# Supplementary material for: A theoretical study of the ligand-controlled palladium-catalysed regiodivergent synthesis of dibenzosilepin derivatives
Source: Royal Society of Chemistry journal article supplement (doi:10.1039/d2dt03767j), 2022-12-13
Supplement: d2dt03767j1.pdf [file d2dt03767j1.pdf]

## *Supporting Information*

# **Computational Exploration of Palladium-Catalyzed Synthesis of Dibenzosilepin Derivatives**

Xueyaun Yan, Miao Yang, Yuan-Bin She\*, and Yun-Fang Yang\*

College of Chemical Engineering, Zhejiang University of Technology, Hangzhou, Zhejiang  
310014, China

\*E-mail: sheyb@zjut.edu.cn

\*E-mail: yangyf@zjut.edu.cn

## **Table of Contents**

|                                                                                                                                                       |     |
|-------------------------------------------------------------------------------------------------------------------------------------------------------|-----|
| Ligand exchange energy. ....                                                                                                                          | S2  |
| Gibbs free energy profiles for the reaction of 1,5-palladium migration and alkyne insertion without the diphosphine ligand. ....                      | S2  |
| Transition state of intramolecular alkyne insertions. ....                                                                                            | S3  |
| The other possible conformations of intramolecular alkyne insertions. ....                                                                            | S4  |
| Gibbs free energy profiles for the reaction of 1,4-palladium migration, C–H activation and reductive elimination without the diphosphine ligand. .... | S5  |
| Gibbs free energy profiles for the formal 1,4-palladium migration without the diphosphine ligand. ....                                                | S6  |
| Gibbs free energy profiles for the reaction of 1,5-palladium migration with the ( <i>R</i> )-BINAP ligand. ....                                       | S7  |
| Gibbs free energy profiles for the reaction of 1,4-palladium migration and C–H activation with the ( <i>R</i> )-BINAP ligand. ....                    | S7  |
| Visual analysis of non-covalent interactions. ....                                                                                                    | S8  |
| The intramolecular alkyne insertion TSs with the ( <i>R</i> )-BINAP ligand. ....                                                                      | S8  |
| Tables of energies. ....                                                                                                                              | S9  |
| Cartesian coordinates of the structures. ....                                                                                                         | S11 |

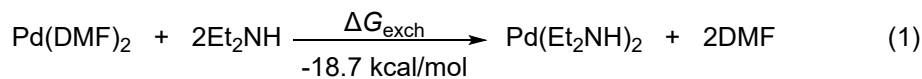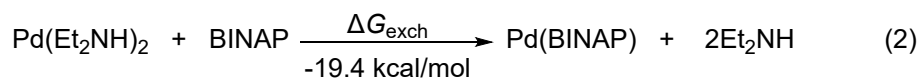

**Scheme S1** Calculated ligand exchange energy  $\Delta G_{\text{exch}}$ .

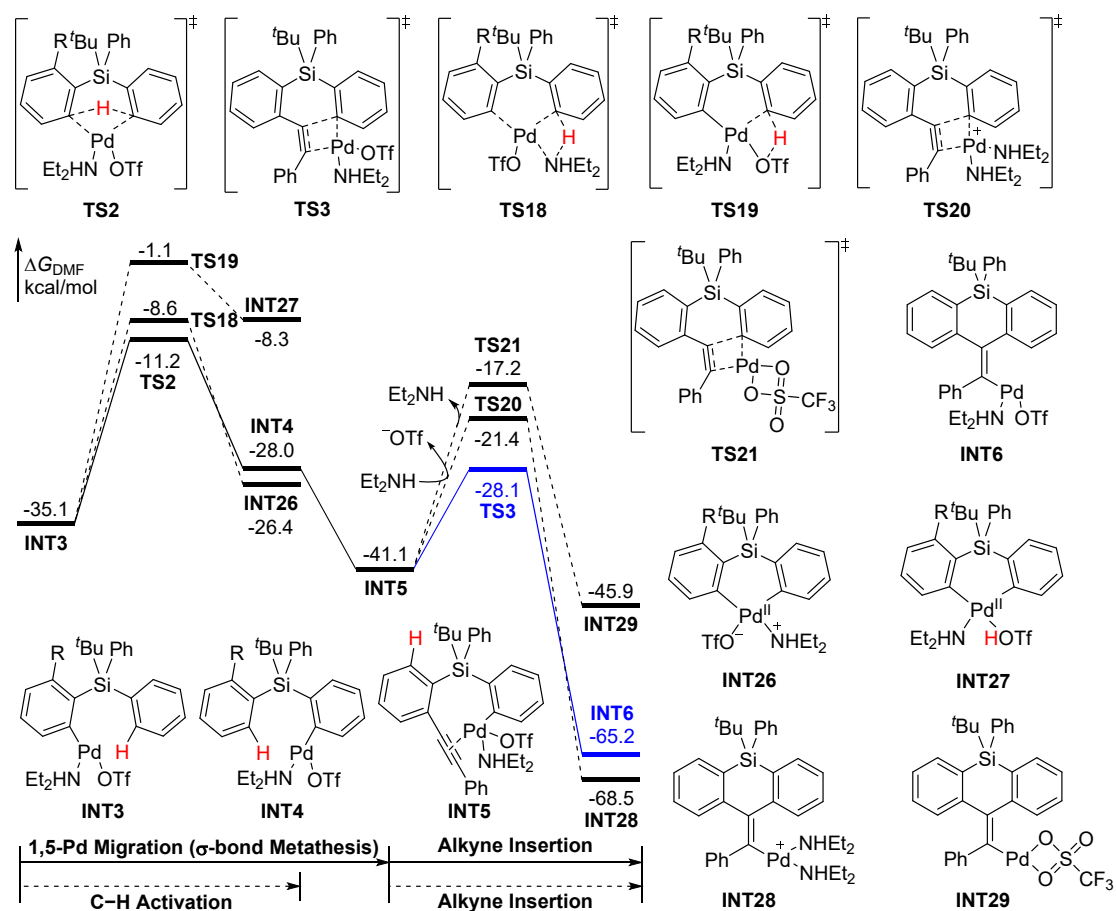

**Fig. S1** Gibbs free energy profiles for the reaction of 1,5-palladium migration and alkyne insertion without the diphosphine ligand.

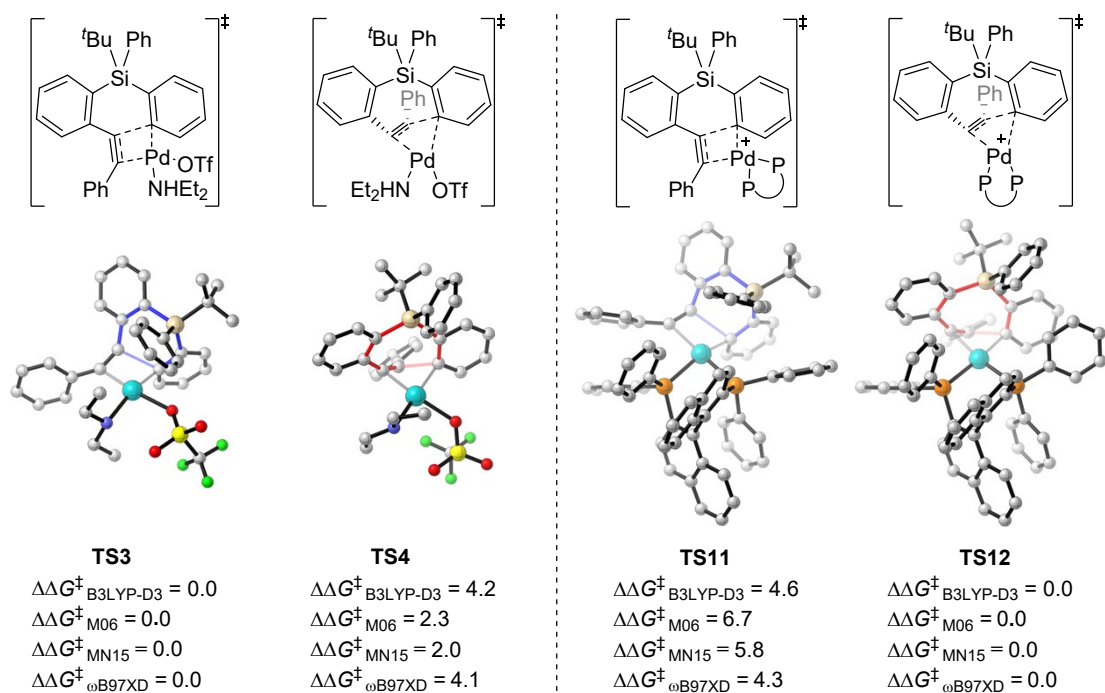

**Fig. S2** Transition states of intramolecular alkyne insertions. Geometry optimization was performed with B3LYP-D3. The LANL2DZ basis set with ECP was used for Pd, and the 6-31G(d) basis set was used for other atoms. The single-point energies from B3LYP-D3, M06, MN15 and  $\omega$ B97XD calculations. The SDD-6-311++G(d,p) basis set by using the SMD solvation model (Solvent = DMF). Gibbs free energies are shown in kcal/mol. Hydrogen atoms omitted for clarity.

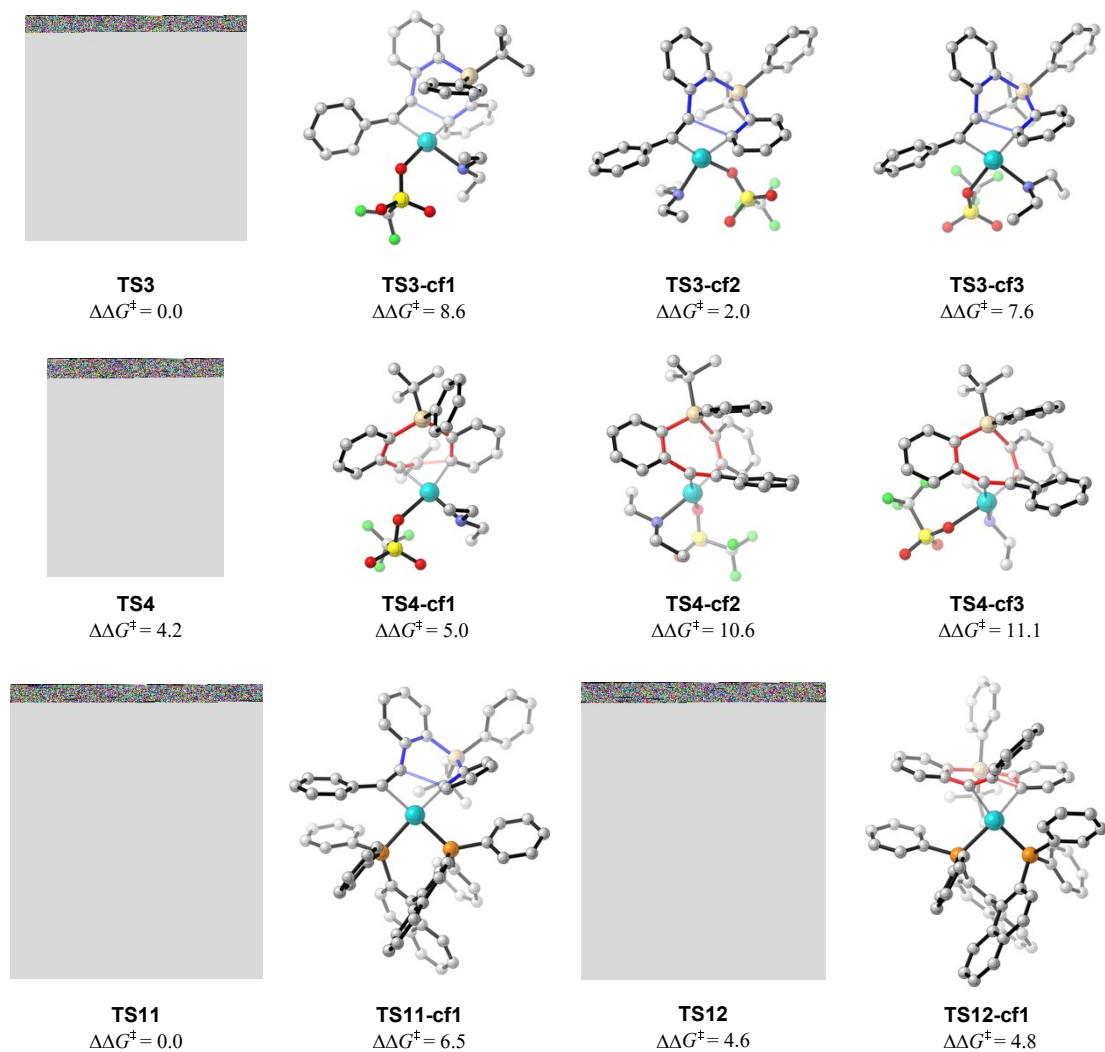

**Fig. S3** The other possible conformations of intramolecular alkyne insertion TSs. Hydrogen atoms omitted for clarity. Gibbs free energies are shown in kcal/mol.

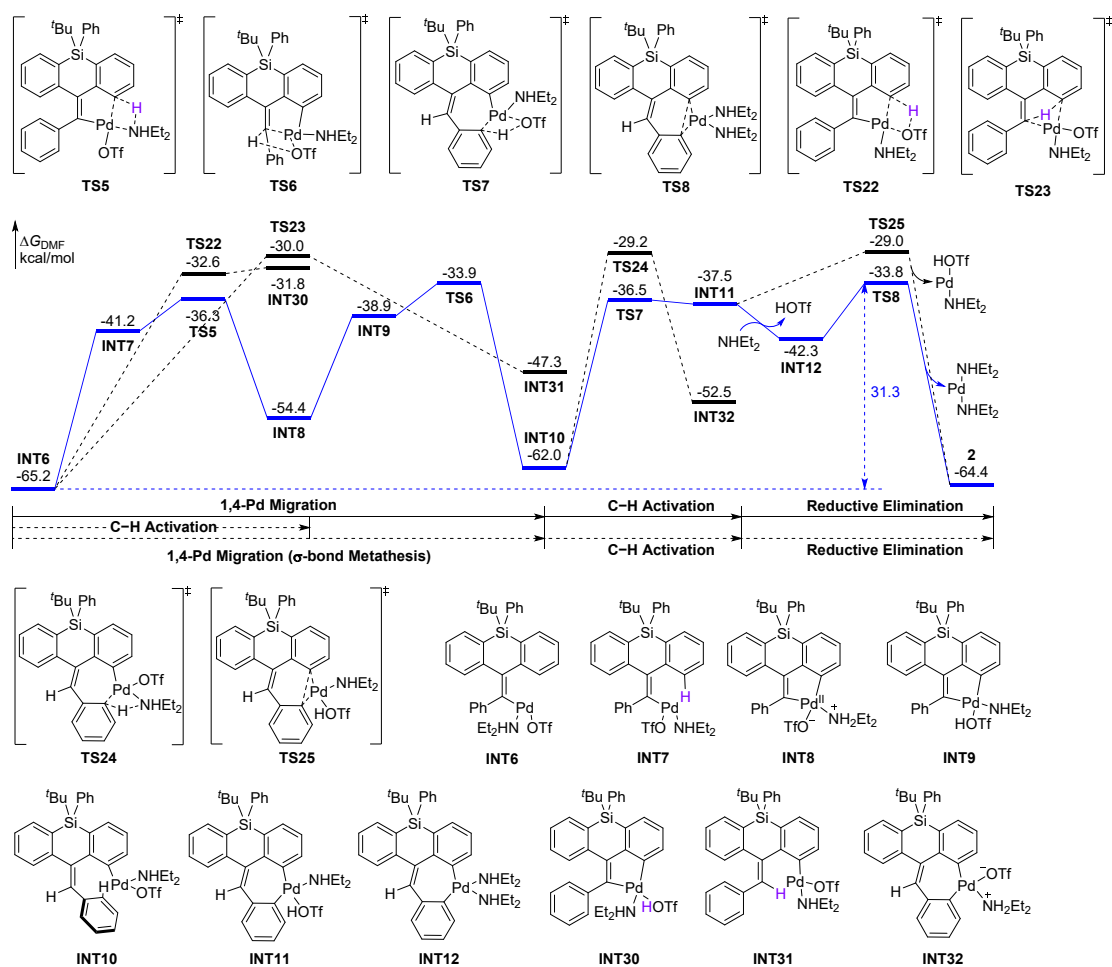

**Fig. S4** Gibbs free energy profiles for the reaction of 1,4-palladium migration, C-H activation and reductive elimination without the diphosphine ligand.

The position of triflate in **INT6** can be exchanged with diethylamine to form the alkenylpalladium intermediate **INT7** to bring the diethylamine close to the reacting C–H bond. The diethylamine-assisted concerted metalation/deprotonation (CMD) process occurs via **TS5** to generate alkenyl(aryl)palladium(II) species **INT8**, which requires a barrier of 28.9 kcal/mol. Then the intramolecular proton exchange generates the arylpalladium intermediate **INT9**, which further shifts the proton via **TS6** to the alkenyl moiety to form the *Z*-alkene arylpalladium intermediate **INT10**. This concerted protodepalladation process is concomitant with the *E*→*Z* alkene isomerization. In addition, the triflic acid can dissociate from **INT9** to form **INT33**, which undergoes an outer-sphere protonation by triflic acid to give intermediate **INT34**. The subsequent depalladation generates intermediate **INT35**, which is then subjected to a *E*→*Z* isomerization via **TS27** through the rotation of the alkene C–C bond to form intermediate **INT10**. Therefore, in the formal 1,4-palladium migration process from **INT6** to **INT10**, the largest energy span for both the concerted mechanism via **TS6** and the stepwise mechanism via **TS26/TS27** is 31.3 kcal/mol.

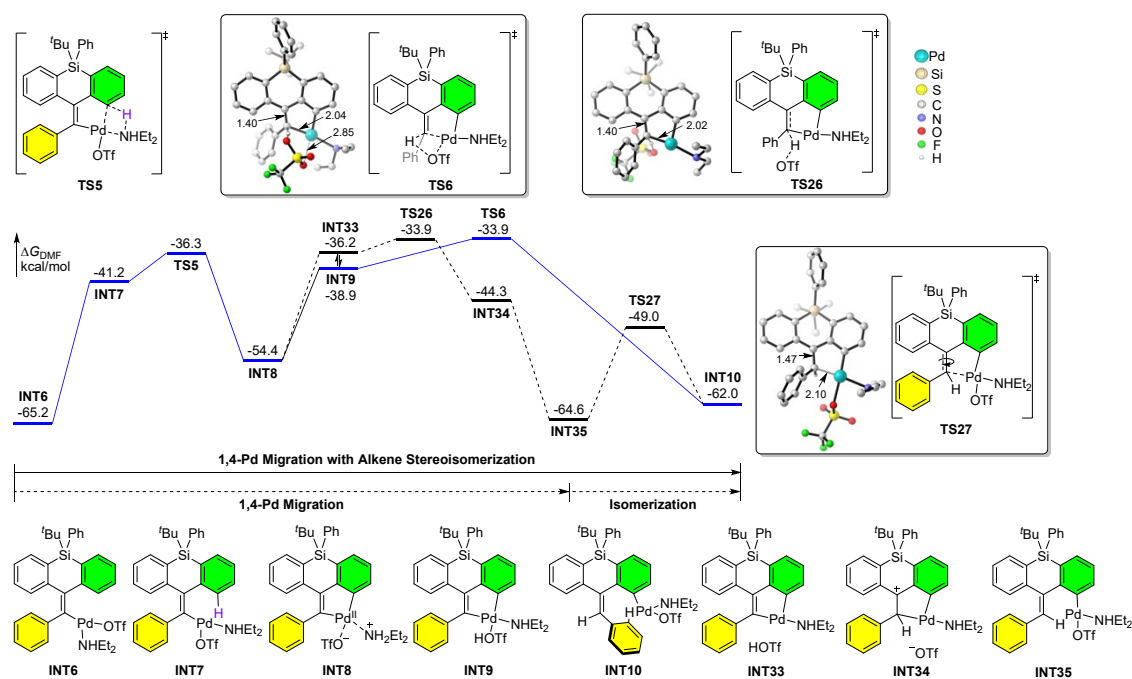

**Fig. S5** Gibbs free energy profiles for the formal 1,4-palladium migration without the diphosphine ligand.

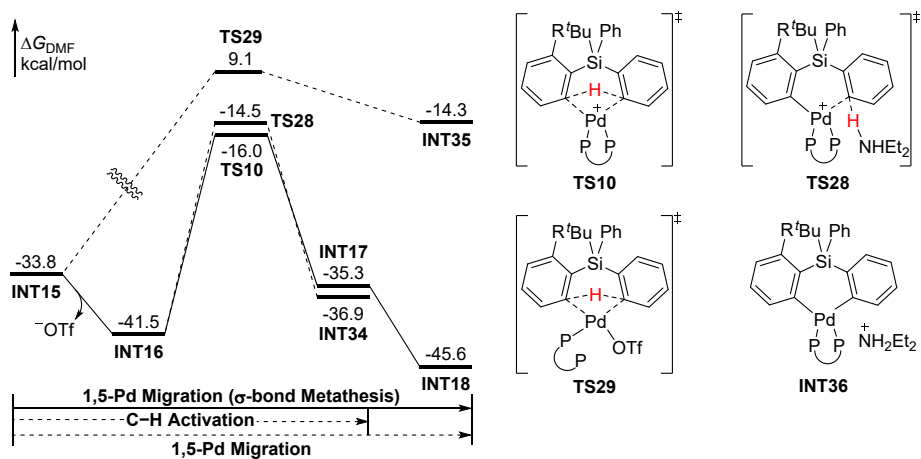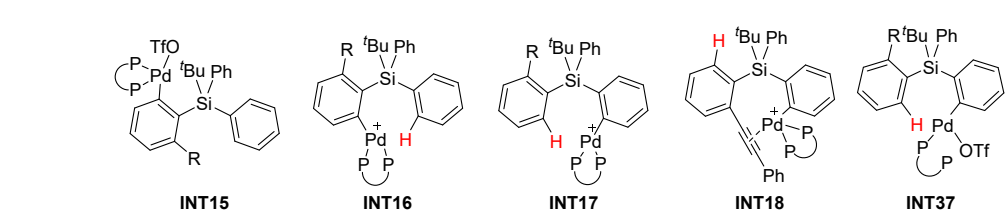

**Fig. S6** Gibbs free energy profiles for the reaction of 1,5-palladium migration with the (*R*)-BINAP ligand.

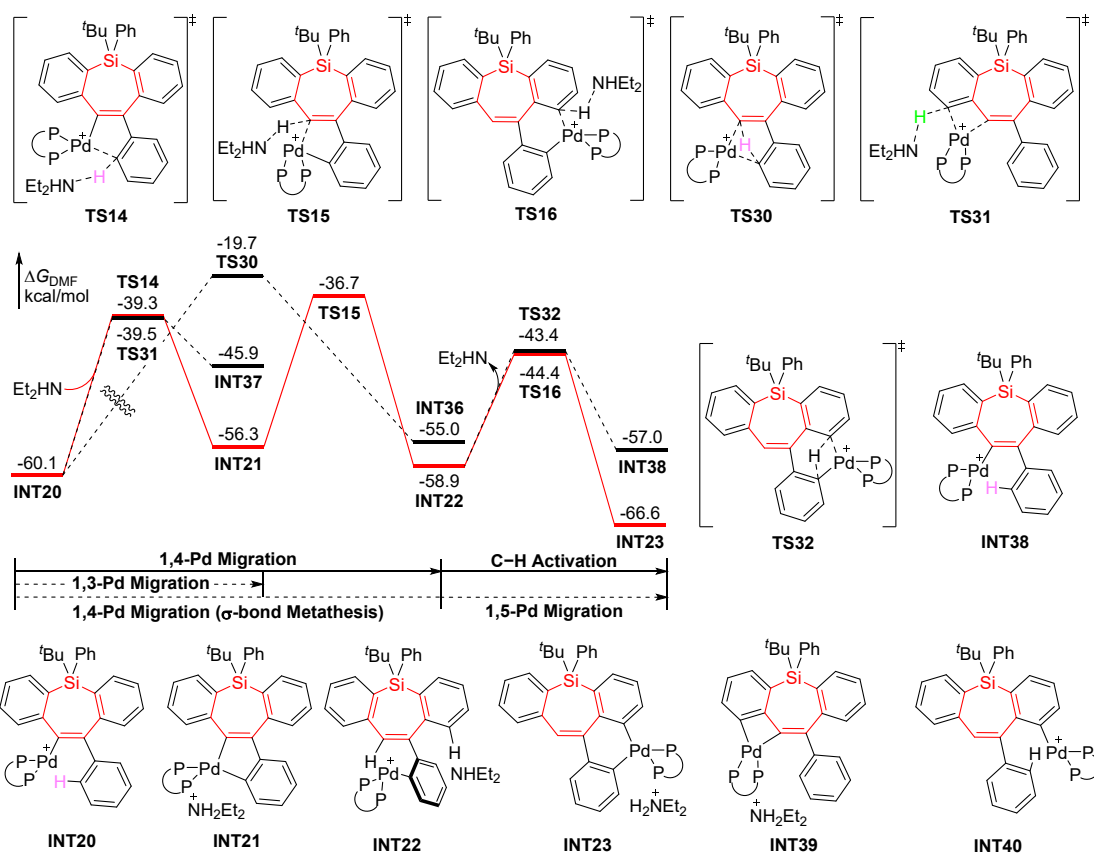

**Fig. S7** Gibbs free energy profiles for the reaction of 1,4-palladium migration and C-H activation with the (*R*)-BINAP ligand.

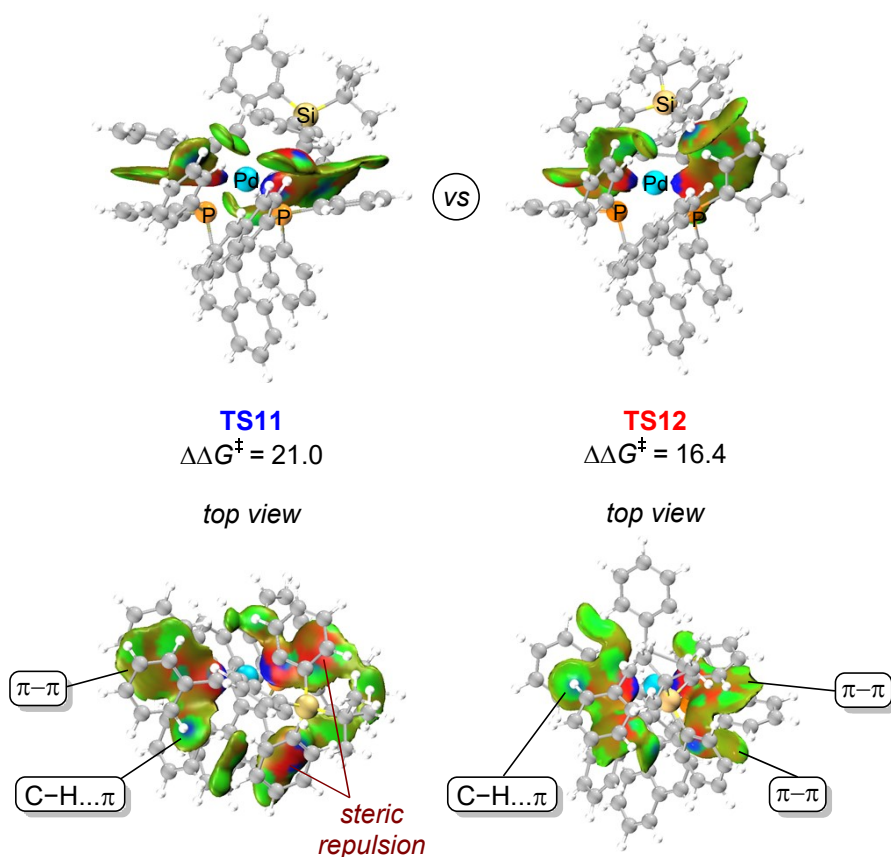

**Fig. S8** Ligand steric effects on divergent alkyne insertion TSs. Visual analysis of non-covalent interactions. For IGM analysis, blue, attraction; green, weak interaction; red, steric effect. Gibbs free energies are shown in kcal/mol.

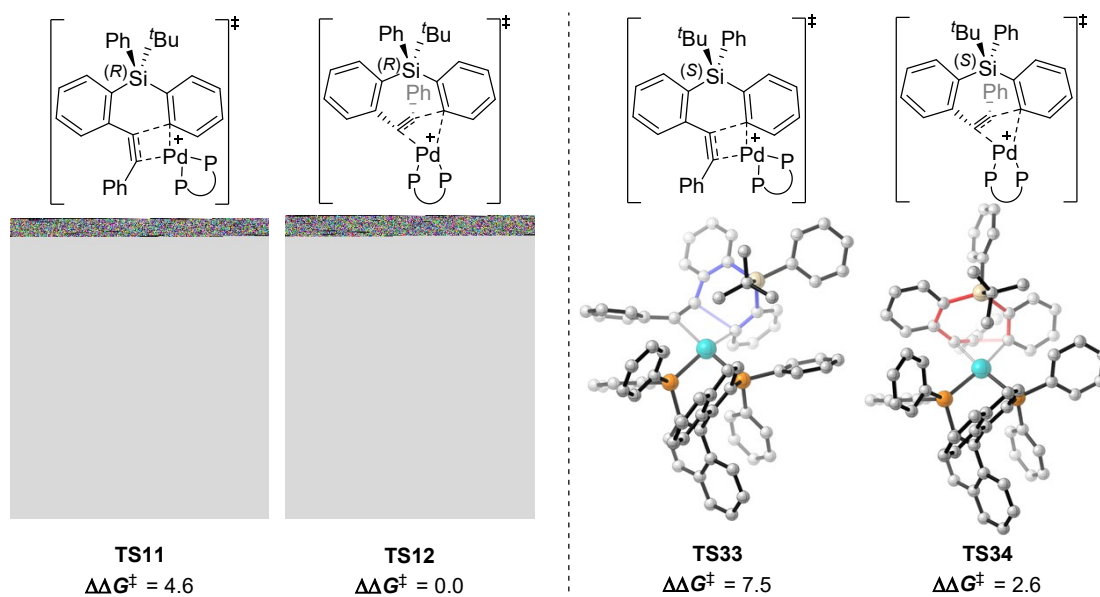

**Fig. S9** The intramolecular alkyne insertion TSs with the (*R*)-BINAP ligand. Hydrogen atoms omitted for clarity. Gibbs free energies are shown in kcal/mol.



**Table S1. Electronic Energies, Enthalpies, and Free Energies (in Hartree) of the Structures Calculated at the SMD<sub>(DMF)</sub>-B3LYP-D3/6-311++G(d,p)-[SDD for Pd]/B3LYP-D3/6-31G(d)[LANL2DZ for Pd] Level of Theory**

| Structures                                      | ZPE      | TCE      | TCH      | TCG       | E <sub>sol</sub> | G <sub>sol</sub> (E <sub>sol</sub> +TCG) | Imaginary Frequency |
|-------------------------------------------------|----------|----------|----------|-----------|------------------|------------------------------------------|---------------------|
| <b>Et<sub>2</sub>NH</b>                         | 0.150542 | 0.157344 | 0.158288 | 0.120568  | -213.879098      | -213.758530                              | —                   |
| <b>DMF</b>                                      | 0.103060 | 0.109129 | 0.110073 | 0.073953  | -248.607783      | -248.533830                              | —                   |
| <b>Pd(Et<sub>2</sub>NH)<sub>2</sub></b>         | 0.305330 | 0.321921 | 0.322865 | 0.258380  | -555.729050      | -555.470670                              | —                   |
| <b>Pd(DMF)<sub>2</sub></b>                      | 0.208114 | 0.223802 | 0.224746 | 0.161026  | -625.152476      | -624.991450                              | —                   |
| <b>Et<sub>2</sub>NH<sub>2</sub><sup>+</sup></b> | 0.165872 | 0.172836 | 0.173780 | 0.135592  | -214.354354      | -214.218762                              | —                   |
| <b>Pd(BINAP)</b>                                | 0.624462 | 0.663420 | 0.664364 | 0.550407  | -2507.258725     | -2506.708318                             | —                   |
| <b>OTf</b>                                      | 0.027217 | 0.034402 | 0.035346 | -0.005344 | -961.809171      | -961.814515                              | —                   |
| <b>HOTf</b>                                     | 0.038558 | 0.046423 | 0.047368 | 0.005380  | -962.233006      | -962.227626                              | —                   |
| <b>1</b>                                        | 0.508168 | 0.544746 | 0.545690 | 0.437008  | -2410.950207     | -2410.513199                             | —                   |
| <b>INT1</b>                                     | 0.813595 | 0.868360 | 0.869305 | 0.720159  | -2966.706451     | -2965.986292                             | —                   |
| <b>TS1</b>                                      | 0.812067 | 0.866703 | 0.867647 | 0.718986  | -2966.690053     | -2965.971067                             | 180.10 <i>i</i>     |
| <b>INT2</b>                                     | 0.817430 | 0.870991 | 0.871935 | 0.728456  | -2966.749858     | -2966.021402                             | —                   |
| <b>INT3</b>                                     | 0.663272 | 0.709342 | 0.710286 | 0.581341  | -2752.862628     | -2752.281287                             | —                   |
| <b>TS2</b>                                      | 0.656510 | 0.702525 | 0.703470 | 0.575531  | -2752.818661     | -2752.243130                             | 1374.31 <i>i</i>    |
| <b>INT4</b>                                     | 0.662591 | 0.708784 | 0.709729 | 0.581003  | -2752.850967     | -2752.269964                             | —                   |
| <b>INT5</b>                                     | 0.662159 | 0.708297 | 0.709241 | 0.579765  | -2752.870576     | -2752.290811                             | —                   |
| <b>TS3</b>                                      | 0.661779 | 0.707151 | 0.708095 | 0.582239  | -2752.852401     | -2752.270162                             | 170.48 <i>i</i>     |
| <b>INT6</b>                                     | 0.664464 | 0.709735 | 0.710679 | 0.584431  | -2752.913739     | -2752.329308                             | —                   |
| <b>TS4</b>                                      | 0.661467 | 0.706729 | 0.707673 | 0.581246  | -2752.844714     | -2752.263468                             | 255.09 <i>i</i>     |
| <b>INT13</b>                                    | 0.663944 | 0.709142 | 0.710086 | 0.584491  | -2752.892308     | -2752.307817                             | —                   |
| <b>INT7</b>                                     | 0.661409 | 0.707735 | 0.708679 | 0.577913  | -2752.868868     | -2752.290955                             | —                   |
| <b>TS5</b>                                      | 0.657815 | 0.703053 | 0.703997 | 0.576705  | -2752.859894     | -2752.283189                             | 1176.58 <i>i</i>    |
| <b>INT8</b>                                     | 0.665756 | 0.710773 | 0.711717 | 0.585395  | -2752.897442     | -2752.312047                             | —                   |
| <b>INT9</b>                                     | 0.661548 | 0.707500 | 0.708444 | 0.578060  | -2752.865393     | -2752.287333                             | —                   |
| <b>TS6</b>                                      | 0.656189 | 0.701778 | 0.702722 | 0.572737  | -2752.852157     | -2752.279420                             | 1415.75 <i>i</i>    |
| <b>INT10</b>                                    | 0.664255 | 0.709427 | 0.710371 | 0.582616  | -2752.906724     | -2752.324108                             | —                   |
| <b>TS7</b>                                      | 0.657051 | 0.701994 | 0.702939 | 0.575348  | -2752.858822     | -2752.283474                             | 1111.52 <i>i</i>    |
| <b>INT11</b>                                    | 0.661577 | 0.707119 | 0.708063 | 0.578726  | -2752.863790     | -2752.285064                             | —                   |
| <b>INT12</b>                                    | 0.775920 | 0.819800 | 0.820744 | 0.698768  | -2004.522380     | -2003.823612                             | —                   |
| <b>TS8</b>                                      | 0.773577 | 0.817493 | 0.818437 | 0.695263  | -2004.505421     | -2003.810158                             | 277.69 <i>i</i>     |
| <b>2</b>                                        | 0.470445 | 0.496408 | 0.497352 | 0.414700  | -1448.802973     | -1448.388273                             | —                   |
| <b>INT14</b>                                    | 1.134164 | 1.211045 | 1.211990 | 1.017685  | -4918.258640     | -4917.240955                             | —                   |
| <b>TS9</b>                                      | 1.132251 | 1.208933 | 1.209877 | 1.016993  | -4918.227115     | -4917.210122                             | 159.08 <i>i</i>     |
| <b>INT15</b>                                    | 1.136583 | 1.212792 | 1.213736 | 1.022982  | -4918.298357     | -4917.275375                             | —                   |
| <b>INT16</b>                                    | 1.107140 | 1.174771 | 1.175715 | 1.003560  | -3956.448295     | -3955.444735                             | —                   |
| <b>TS10</b>                                     | 1.101170 | 1.168406 | 1.169351 | 0.998907  | -3956.435182     | -3955.436275                             | 1273.08 <i>i</i>    |
| <b>INT17</b>                                    | 1.107257 | 1.174777 | 1.175721 | 1.004685  | -3956.471729     | -3955.467044                             | —                   |
| <b>INT18</b>                                    | 1.107624 | 1.174922 | 1.175866 | 1.005698  | -3956.485442     | -3955.479744                             | —                   |

|              |          |          |          |          |              |              |          |
|--------------|----------|----------|----------|----------|--------------|--------------|----------|
| <b>TS12</b>  | 1.106474 | 1.172987 | 1.173931 | 1.006210 | -3956.459789 | -3955.453579 | 318.74i  |
| <b>INT19</b> | 1.109359 | 1.175929 | 1.176873 | 1.008809 | -3956.504317 | -3955.495508 | —        |
| <b>TS11</b>  | 1.106654 | 1.173342 | 1.174286 | 1.007417 | -3956.453601 | -3955.446184 | 75.49    |
| <b>INT25</b> | 1.109125 | 1.175763 | 1.176707 | 1.007836 | -3956.525475 | -3955.517639 | —        |
| <b>TS13</b>  | 1.107881 | 1.174044 | 1.174988 | 1.006081 | -3956.476679 | -3955.470598 | 25.22i   |
| <b>INT20</b> | 1.109413 | 1.175905 | 1.176849 | 1.008204 | -3956.510939 | -3955.502735 | —        |
| <b>TS14</b>  | 1.258688 | 1.332442 | 1.333386 | 1.150204 | -4170.378341 | -4169.228137 | 1415.55i |
| <b>INT21</b> | 1.265003 | 1.339183 | 1.340127 | 1.154974 | -4170.410194 | -4169.255220 | —        |
| <b>TS15</b>  | 1.258256 | 1.331901 | 1.332845 | 1.149861 | -4170.373803 | -4169.223942 | 1311.14i |
| <b>INT22</b> | 1.261937 | 1.336911 | 1.337855 | 1.149556 | -4170.408843 | -4169.259287 | —        |
| <b>TS16</b>  | 1.257876 | 1.331946 | 1.332890 | 1.147408 | -4170.383556 | -4169.236148 | 1425.78i |
| <b>INT23</b> | 1.263942 | 1.338569 | 1.339513 | 1.151878 | -4170.423382 | -4169.271504 | —        |
| <b>INT24</b> | 1.096353 | 1.162379 | 1.163323 | 0.996099 | -3956.043265 | -3955.047166 | 291.81i  |
| <b>TS17</b>  | 1.094299 | 1.160182 | 1.161126 | 0.993436 | -3956.025092 | -3955.031656 | —        |
| <b>3</b>     | 0.470116 | 0.496131 | 0.497075 | 0.414767 | -1448.784762 | -1448.369995 | —        |
| <b>TS18</b>  | 0.655693 | 0.701854 | 0.702798 | 0.572097 | -2752.811219 | -2752.239122 | 984.83i  |
| <b>INT26</b> | 0.662780 | 0.709326 | 0.710270 | 0.579320 | -2752.846756 | -2752.267436 | —        |
| <b>TS19</b>  | 0.653981 | 0.700466 | 0.701410 | 0.570068 | -2752.797138 | -2752.227070 | 1421.95i |
| <b>INT27</b> | 0.658994 | 0.705974 | 0.706918 | 0.574386 | -2752.813014 | -2752.238628 | —        |
| <b>TS20</b>  | 0.788022 | 0.832135 | 0.833079 | 0.713346 | -2004.916765 | -2004.203419 | 215.83i  |
| <b>INT28</b> | 0.790111 | 0.834204 | 0.835148 | 0.714644 | -2004.993127 | -2004.278483 | —        |
| <b>TS21</b>  | 0.506220 | 0.544214 | 0.545158 | 0.434449 | -2538.928608 | -2538.494159 | 325.32i  |
| <b>INT29</b> | 0.509095 | 0.546945 | 0.547890 | 0.436937 | -2538.976910 | -2538.539973 | —        |
| <b>TS22</b>  | 0.657994 | 0.702871 | 0.703815 | 0.578412 | -2752.855635 | -2752.277223 | 795.30i  |
| <b>INT30</b> | 0.661591 | 0.707098 | 0.708042 | 0.580792 | -2752.856729 | -2752.275937 | —        |
| <b>TS23</b>  | 0.658790 | 0.703715 | 0.704659 | 0.579883 | -2752.852966 | -2752.273083 | 1321.40i |
| <b>INT31</b> | 0.663419 | 0.708498 | 0.709442 | 0.583850 | -2752.884643 | -2752.300793 | —        |
| <b>TS24</b>  | 0.657470 | 0.702611 | 0.703556 | 0.576341 | -2752.848266 | -2752.271925 | 897.76i  |
| <b>INT32</b> | 0.664619 | 0.710215 | 0.711159 | 0.582258 | -2752.891334 | -2752.309076 | —        |
| <b>TS25</b>  | 0.660598 | 0.705733 | 0.706677 | 0.579739 | -2752.851277 | -2752.271538 | 259.39i  |
| <b>INT33</b> | 0.661296 | 0.707424 | 0.708368 | 0.576881 | -2752.859867 | -2752.282986 | —        |
| <b>TS26</b>  | 0.656713 | 0.702183 | 0.703127 | 0.573954 | -2752.85337  | -2752.279416 | 1355.68i |
| <b>INT34</b> | 0.661401 | 0.707460 | 0.708404 | 0.575263 | -2752.87112  | -2752.295857 | —        |
| <b>INT35</b> | 0.664186 | 0.709469 | 0.710413 | 0.582948 | -2752.911178 | -2752.328230 | —        |
| <b>TS27</b>  | 0.662683 | 0.707177 | 0.708121 | 0.582328 | -2752.885739 | -2752.303411 | 8.1i     |
| <b>TS28</b>  | 1.255316 | 1.330419 | 1.331363 | 1.143653 | -4170.332209 | -4169.188556 | 1176.49i |
| <b>INT36</b> | 1.262340 | 1.337797 | 1.338741 | 1.150267 | -4170.374461 | -4169.224194 | —        |
| <b>TS29</b>  | 1.127985 | 1.204371 | 1.205316 | 1.014879 | -4918.221923 | -4917.207044 | 1431.67i |
| <b>INT37</b> | 1.134152 | 1.210828 | 1.211772 | 1.019754 | -4918.264033 | -4917.244279 | —        |
| <b>TS30</b>  | 1.103860 | 1.170146 | 1.171090 | 1.002860 | -3956.441262 | -3955.438402 | 1501.31i |
| <b>INT38</b> | 1.108542 | 1.174988 | 1.175933 | 1.006347 | -3956.500960 | -3955.494613 | —        |
| <b>TS31</b>  | 1.258284 | 1.332350 | 1.333294 | 1.148148 | -4170.376501 | -4169.228353 | 943.96i  |
| <b>INT39</b> | 1.264353 | 1.338733 | 1.339677 | 1.153940 | -4170.392451 | -4169.238511 | —        |
| <b>TS32</b>  | 1.103582 | 1.169650 | 1.170595 | 1.003111 | -3956.479304 | -3955.476193 | 1391.57i |

|                 |          |          |          |          |              |              |                 |
|-----------------|----------|----------|----------|----------|--------------|--------------|-----------------|
| <b>INT40</b>    | 1.110096 | 1.176322 | 1.177266 | 1.010449 | -3956.508243 | -3955.497794 | —               |
| <b>TS3-cf1</b>  | 0.662887 | 0.707775 | 0.708719 | 0.585196 | -2752.841675 | -2752.256479 | 172.04 <i>i</i> |
| <b>TS3-cf2</b>  | 0.661145 | 0.706728 | 0.707673 | 0.579653 | -2752.846549 | -2752.266896 | 145.99 <i>i</i> |
| <b>TS3-cf3</b>  | 0.661810 | 0.707094 | 0.708038 | 0.582482 | -2752.840519 | -2752.258037 | 205.71 <i>i</i> |
| <b>TS4-cf1</b>  | 0.661110 | 0.706484 | 0.707428 | 0.581453 | -2752.843721 | -2752.262268 | 373.00 <i>i</i> |
| <b>TS4-cf2</b>  | 0.661405 | 0.706858 | 0.707802 | 0.581313 | -2752.834510 | -2752.253197 | 193.21 <i>i</i> |
| <b>TS4-cf3</b>  | 0.661123 | 0.706472 | 0.707417 | 0.581546 | -2752.834073 | -2752.252527 | 330.00 <i>i</i> |
| <b>TS11-cf1</b> | 1.106392 | 1.172973 | 1.173918 | 1.006039 | -3956.451984 | -3955.445945 | 101.53 <i>i</i> |
| <b>TS12-cf1</b> | 1.105995 | 1.172930 | 1.173875 | 1.003363 | -3956.446641 | -3955.443278 | 244.43 <i>i</i> |
| <b>TS33</b>     | 1.106575 | 1.173084 | 1.174028 | 1.007008 | -3956.448595 | -3955.441587 | 112.47 <i>i</i> |
| <b>TS34</b>     | 1.106108 | 1.173026 | 1.173970 | 1.003413 | -3956.452800 | -3955.449387 | 312.11 <i>i</i> |

**ZPVE** = zero-point vibrational energy; **TCE** = thermal correction to energy; **TCH** = thermal correction to enthalpy; **TCG** = thermal correction to Gibbs free energy.

### Cartesian coordinates of the structures

#### **Et<sub>2</sub>NH**

|   |             |             |             |
|---|-------------|-------------|-------------|
| N | 0.00001700  | -0.27541000 | -0.07360900 |
| H | 0.00007900  | -0.96824300 | 0.67566700  |
| C | 1.22176600  | 0.51995600  | 0.02202300  |
| C | 2.46090200  | -0.37193300 | -0.03206600 |
| H | 1.25338500  | 1.14737800  | 0.93593100  |
| H | 1.23229900  | 1.21701700  | -0.82721200 |
| H | 3.37733600  | 0.22782300  | -0.00225200 |
| H | 2.48710400  | -1.06143300 | 0.82196700  |
| H | 2.46152500  | -0.97068600 | -0.94885100 |
| C | -1.22180500 | 0.51992900  | 0.02222400  |
| C | -2.46088400 | -0.37194300 | -0.03214800 |
| H | -1.23234300 | 1.21713200  | -0.82687600 |
| H | -1.25347700 | 1.14707800  | 0.93628800  |
| H | -3.37730200 | 0.22783700  | -0.00207200 |
| H | -2.46160000 | -0.97035000 | -0.94915800 |
| H | -2.48700000 | -1.06173400 | 0.82163300  |

#### **DMF**

|   |             |             |             |
|---|-------------|-------------|-------------|
| C | -0.82436100 | -0.69305200 | 0.02980800  |
| O | -1.92281200 | -0.15956000 | -0.00014100 |
| N | 0.35778100  | -0.01700700 | 0.04989400  |
| H | -0.68783200 | -1.79387300 | 0.04977400  |
| C | 0.30484700  | 1.44090200  | -0.00988800 |
| H | -0.71692000 | 1.78719800  | 0.58501700  |
| H | 1.32323400  | 1.83662700  | 0.55013500  |
| H | 0.26302300  | 1.82742800  | -1.18465900 |

|   |            |             |             |
|---|------------|-------------|-------------|
| C | 1.64393000 | -0.68792600 | -0.04979000 |
| H | 2.15089800 | -0.44480000 | -0.99969300 |
| H | 2.31016700 | -0.40551900 | 0.78081800  |
| H | 1.48896200 | -1.77108400 | -0.02030100 |

**Pd (Et<sub>2</sub>NH)<sub>2</sub>**

|    |             |             |             |
|----|-------------|-------------|-------------|
| N  | -2.17069300 | 0.04204200  | 0.17550600  |
| H  | -2.31190700 | 0.46355900  | 1.09649800  |
| C  | -2.86637400 | 0.90424300  | -0.81240900 |
| C  | -2.40831900 | 2.35657100  | -0.73492000 |
| H  | -3.95769200 | 0.84813100  | -0.65479700 |
| H  | -2.65709100 | 0.49149500  | -1.80421500 |
| H  | -2.94993400 | 2.96230200  | -1.47066300 |
| H  | -2.60388900 | 2.77939300  | 0.25886400  |
| H  | -1.33273100 | 2.42402700  | -0.92734200 |
| C  | -2.77057100 | -1.31504400 | 0.21896400  |
| C  | -2.21015300 | -2.15712200 | 1.36000000  |
| H  | -2.56135300 | -1.79078000 | -0.74426800 |
| H  | -3.86752800 | -1.23634700 | 0.31682500  |
| H  | -2.67900500 | -3.14795200 | 1.36305000  |
| H  | -1.12600400 | -2.26550700 | 1.25148700  |
| H  | -2.40894000 | -1.68719300 | 2.33164500  |
| Pd | 0.00000100  | 0.04907200  | -0.00000900 |
| N  | 2.17072400  | 0.04216500  | -0.17555300 |
| H  | 2.31191100  | 0.46378400  | -1.09650000 |
| C  | 2.86611100  | 0.90447100  | 0.81249300  |
| C  | 2.40790500  | 2.35674300  | 0.73490500  |
| H  | 3.95747000  | 0.84849700  | 0.65508200  |
| H  | 2.65669600  | 0.49168600  | 1.80425000  |
| H  | 2.94934100  | 2.96253000  | 1.47073500  |
| H  | 2.60359900  | 2.77958300  | -0.25884700 |
| H  | 1.33227600  | 2.42409200  | 0.92714200  |
| C  | 2.77091100  | -1.31475000 | -0.21903100 |
| C  | 2.21046800  | -2.15700400 | -1.35992500 |
| H  | 2.56197500  | -1.79049800 | 0.74426000  |
| H  | 3.86783400  | -1.23580500 | -0.31708000 |
| H  | 2.67955000  | -3.14772500 | -1.36304100 |
| H  | 1.12636500  | -2.26562400 | -1.25118500 |
| H  | 2.40893700  | -1.68705600 | -2.33162700 |

**Pd (DMF)<sub>2</sub>**

|   |            |             |             |
|---|------------|-------------|-------------|
| C | 2.99438700 | -0.95096200 | -0.22436100 |
| O | 1.82458900 | -1.10212600 | -0.58406800 |
| N | 3.53640600 | 0.08756600  | 0.45359500  |

|                                                 |             |             |             |
|-------------------------------------------------|-------------|-------------|-------------|
| H                                               | 3.73093900  | -1.73626300 | -0.45928300 |
| C                                               | 2.77281900  | 1.25219300  | 0.88275000  |
| H                                               | 1.72550900  | 1.14640900  | 0.56178800  |
| H                                               | 2.81210500  | 1.34105200  | 1.97583700  |
| H                                               | 3.19871400  | 2.16035400  | 0.43817700  |
| C                                               | 4.95023400  | 0.08836100  | 0.79037300  |
| H                                               | 5.45357100  | 0.95169900  | 0.33649500  |
| H                                               | 5.08714000  | 0.14289700  | 1.87807900  |
| H                                               | 5.42725800  | -0.82527300 | 0.42424600  |
| Pd                                              | 0.00007300  | -0.00070100 | -0.53676300 |
| C                                               | -2.99413400 | 0.95080400  | -0.22603200 |
| O                                               | -1.82442300 | 1.10066100  | -0.58652800 |
| N                                               | -3.53638300 | -0.08607600 | 0.45427800  |
| H                                               | -3.73039600 | 1.73605500  | -0.46203400 |
| C                                               | -2.77340900 | -1.25068300 | 0.88457500  |
| H                                               | -1.72567300 | -1.14495700 | 0.56506200  |
| H                                               | -2.81433000 | -1.33937800 | 1.97760000  |
| H                                               | -3.19858000 | -2.15896700 | 0.43951400  |
| C                                               | -4.95034800 | -0.08608700 | 0.79045800  |
| H                                               | -5.45399200 | -0.94932000 | 0.33668200  |
| H                                               | -5.08764700 | -0.14020900 | 1.87812300  |
| H                                               | -5.42677700 | 0.82768900  | 0.42391000  |
| <b>Et<sub>2</sub>NH<sub>2</sub><sup>+</sup></b> |             |             |             |
| H                                               | -0.00015700 | -0.88560100 | -0.81694300 |
| N                                               | -0.00002700 | -0.26157400 | -0.00014500 |
| C                                               | 1.28530000  | 0.55098700  | -0.00011200 |
| C                                               | -1.28531000 | 0.55106900  | 0.00011800  |
| H                                               | 0.00006100  | -0.88589600 | 0.81642600  |
| H                                               | 1.24097800  | 1.18732800  | 0.88734500  |
| H                                               | 1.24118000  | 1.18707000  | -0.88777900 |
| H                                               | -1.24114000 | 1.18751000  | -0.88727600 |
| H                                               | -1.24115900 | 1.18703200  | 0.88786200  |
| C                                               | -2.50515100 | -0.35873100 | 0.00000900  |
| H                                               | -2.54009700 | -0.99390500 | 0.89209800  |
| H                                               | -3.40710000 | 0.26005800  | 0.00036600  |
| H                                               | -2.54046000 | -0.99337100 | -0.89245200 |
| C                                               | 2.50518400  | -0.35870700 | 0.00012100  |
| H                                               | 2.54058200  | -0.99363600 | -0.89211000 |
| H                                               | 3.40701600  | 0.26029600  | 0.00025000  |
| H                                               | 2.54034200  | -0.99357100 | 0.89241300  |
| <b>Pd (BINAP)</b>                               |             |             |             |
| P                                               | 0.59886400  | -1.62665800 | -0.12980200 |

|   |             |             |             |
|---|-------------|-------------|-------------|
| P | 0.59896900  | 1.62667400  | 0.12976200  |
| C | -1.50637300 | 5.35347000  | 1.99524800  |
| C | -0.86465700 | 5.46815000  | 0.76681000  |
| C | -0.17775300 | 4.38138300  | 0.22440000  |
| C | -0.12264200 | 3.15590300  | 0.89774700  |
| C | -0.79651300 | 3.04974700  | 2.12591700  |
| C | -1.46839100 | 4.13681700  | 2.67522400  |
| H | 0.30738700  | 4.50273300  | -0.73784900 |
| H | -0.81282300 | 2.09867400  | 2.64969500  |
| C | -1.50719200 | -5.35320600 | -1.99498500 |
| C | -0.86548200 | -5.46790700 | -0.76654400 |
| C | -0.17833000 | -4.38124000 | -0.22424800 |
| C | -0.12294700 | -3.15584000 | -0.89771800 |
| C | -0.79681900 | -3.04965700 | -2.12588800 |
| C | -1.46894900 | -4.13663000 | -2.67508200 |
| H | 0.30678600  | -4.50259900 | 0.73801200  |
| H | -0.81295700 | -2.09862800 | -2.64974900 |
| C | 2.82272700  | -3.34663200 | 3.57483200  |
| C | 3.16703100  | -3.77034400 | 2.29153100  |
| C | 2.49643600  | -3.25868300 | 1.18609600  |
| C | 1.45909300  | -2.33141000 | 1.34632800  |
| C | 1.10754800  | -1.93092500 | 2.63559400  |
| C | 1.79012700  | -2.42858900 | 3.74449600  |
| H | 2.78873300  | -3.57920100 | 0.18877300  |
| H | 0.31045900  | -1.20441800 | 2.76504500  |
| C | 2.82301700  | 3.34649300  | -3.57485900 |
| C | 3.16734200  | 3.77017700  | -2.29155500 |
| C | 2.49668600  | 3.25857600  | -1.18613200 |
| C | 1.45926300  | 2.33139600  | -1.34636600 |
| C | 1.10768400  | 1.93095500  | -2.63564200 |
| C | 1.79033000  | 2.42854700  | -3.74453300 |
| H | 2.78900600  | 3.57904500  | -0.18879800 |
| H | 0.31053200  | 1.20452200  | -2.76510800 |
| H | 6.75320400  | -2.29711600 | 1.67860600  |
| C | 3.00609500  | 0.25491700  | 0.70675000  |
| C | 2.07139100  | 1.17254700  | 1.17216700  |
| C | 2.16291200  | 1.63955200  | 2.50965900  |
| H | 1.45204500  | 2.37272500  | 2.87201900  |
| C | 3.13608000  | 1.19337100  | 3.36079900  |
| H | 3.18427500  | 1.56566400  | 4.38110900  |
| C | 4.10089300  | 0.25380600  | 2.92391900  |
| C | 4.04526000  | -0.21425900 | 1.58281700  |
| H | 5.00325000  | -1.54229400 | 0.15435800  |
| C | 5.03252600  | -1.15092100 | 1.16495800  |

|    |             |             |             |
|----|-------------|-------------|-------------|
| C  | 6.01286300  | -1.58059900 | 2.02286400  |
| H  | 6.83557600  | -1.46722200 | 4.02797900  |
| C  | 6.05823100  | -1.11333500 | 3.35679500  |
| H  | 5.13603300  | 0.14922000  | 4.81933800  |
| C  | 5.11772500  | -0.21816700 | 3.79627600  |
| H  | 6.83572400  | 1.46676600  | -4.02798100 |
| C  | 3.13608700  | -1.19364000 | -3.36079600 |
| H  | 3.18430200  | -1.56599500 | -4.38108300 |
| C  | 2.16287400  | -1.63973000 | -2.50966300 |
| H  | 1.45198200  | -2.37287900 | -2.87201600 |
| C  | 2.07132800  | -1.17265600 | -1.17219500 |
| C  | 3.00609300  | -0.25507300 | -0.70679100 |
| C  | 4.04527500  | 0.21403500  | -1.58286300 |
| C  | 4.10092700  | -0.25409200 | -2.92394000 |
| H  | 5.13614300  | -0.14964600 | -4.81932700 |
| C  | 5.11780700  | 0.21779700  | -3.79628500 |
| C  | 6.05832900  | 1.11295300  | -3.35681400 |
| H  | 6.75326900  | 2.29682900  | -1.67867800 |
| C  | 6.01292600  | 1.58030100  | -2.02291400 |
| H  | 5.00323400  | 1.54212800  | -0.15444000 |
| C  | 5.03254500  | 1.15070200  | -1.16501900 |
| H  | -2.03894000 | 6.20084600  | 2.41760000  |
| H  | -2.03996600 | -6.20050500 | -2.41722900 |
| H  | 3.35999700  | -3.73090600 | 4.43741300  |
| H  | 3.36033100  | 3.73072600  | -4.43743100 |
| H  | -0.89534900 | 6.40645800  | 0.21993300  |
| H  | -1.97373700 | 4.02775300  | 3.63083500  |
| H  | -0.89637600 | -6.40616000 | -0.21958400 |
| H  | -1.97429200 | -4.02754200 | -3.63069100 |
| H  | 1.51804600  | 2.09088800  | -4.74085800 |
| H  | 3.97435300  | 4.48373700  | -2.15113000 |
| H  | 1.51785700  | -2.09091100 | 4.74081700  |
| H  | 3.97397600  | -4.48398000 | 2.15111500  |
| Pd | -0.96158300 | 0.00006000  | -0.00001700 |

**OTf<sup>-</sup>**

|   |              |             |            |
|---|--------------|-------------|------------|
| O | -10.99025166 | 9.85821716  | 4.52273628 |
| S | -11.03590666 | 9.04464316  | 3.29247028 |
| O | -9.88044866  | 8.13324516  | 3.09347628 |
| O | -12.34731266 | 8.44893216  | 2.93847428 |
| C | -10.76090266 | 10.28469116 | 1.93122428 |
| F | -10.86683166 | 9.68401216  | 0.71673028 |
| F | -11.64476166 | 11.29021916 | 1.96489628 |
| F | -9.52032066  | 10.81388216 | 2.00435228 |

**HOTf**

|   |             |             |             |
|---|-------------|-------------|-------------|
| O | -1.27473100 | -0.71859200 | -1.27052900 |
| S | -0.85366500 | -0.14825100 | -0.00049600 |
| O | -1.27775100 | -0.71541900 | 1.27060900  |
| C | 1.01062100  | -0.00099700 | 0.00000400  |
| F | 1.41085800  | 0.64486100  | 1.08993300  |
| F | 1.49800900  | -1.24003200 | 0.00005700  |
| F | 1.41086800  | 0.64477200  | -1.08997400 |
| O | -1.09984000 | 1.47124700  | -0.00160300 |
| H | -2.06413200 | 1.63369400  | 0.04996200  |

**1**

|    |             |             |             |
|----|-------------|-------------|-------------|
| C  | 1.76777200  | -2.62640400 | -1.32347900 |
| C  | 1.44032500  | -1.45743800 | -0.64185400 |
| C  | 0.13383800  | -1.02167300 | -0.37595600 |
| C  | -0.89001400 | -1.93890700 | -0.76662600 |
| C  | -0.57514700 | -3.14794300 | -1.42317500 |
| C  | 0.74020400  | -3.47927800 | -1.71638800 |
| Si | -0.22723900 | 0.70334600  | 0.41787600  |
| C  | -1.72958300 | 1.46874600  | -0.45241900 |
| C  | -2.45842300 | 2.50532600  | 0.15915700  |
| C  | -2.06764500 | 1.14154400  | -1.77893700 |
| C  | -3.09382200 | 1.80193300  | -2.45615500 |
| C  | -3.80967200 | 2.82024600  | -1.82305600 |
| C  | -3.48550100 | 3.17403500  | -0.51235000 |
| H  | 2.80408000  | -2.86540500 | -1.52233200 |
| H  | -1.38615300 | -3.81368400 | -1.69993400 |
| H  | 0.97154900  | -4.40198100 | -2.23977200 |
| H  | -2.22402400 | 2.81018800  | 1.17367300  |
| H  | -1.53017600 | 0.34899300  | -2.29226600 |
| H  | -3.33724800 | 1.51783900  | -3.47662600 |
| H  | -4.61103200 | 3.33391500  | -2.34752900 |
| H  | -4.03107100 | 3.96896300  | -0.01003100 |
| O  | 3.64461600  | -2.55689100 | 0.95547500  |
| S  | 3.72142600  | -1.12357000 | 0.72151000  |
| O  | 3.90760200  | -0.17053300 | 1.80095100  |
| O  | 2.49707500  | -0.60411100 | -0.23365500 |
| C  | 5.07920500  | -0.79152400 | -0.51794800 |
| F  | 5.07672000  | 0.49274300  | -0.85210700 |
| F  | 4.88197900  | -1.54355100 | -1.60535400 |
| F  | 6.24337400  | -1.11653400 | 0.04247400  |
| C  | 1.17869900  | 1.90669400  | -0.00185400 |
| C  | 2.23378500  | 2.22091500  | 0.87259000  |



|   |             |             |             |
|---|-------------|-------------|-------------|
| C | 1.20531700  | 2.49170800  | -1.28210800 |
| C | 3.27769600  | 3.06067500  | 0.48420000  |
| H | 2.27607700  | 1.77827900  | 1.85978000  |
| C | 2.24857800  | 3.33015300  | -1.67959400 |
| H | 0.39911400  | 2.29583500  | -1.98410900 |
| C | 3.29099000  | 3.61606000  | -0.79662600 |
| H | 4.08521500  | 3.27021500  | 1.18078500  |
| H | 2.24421800  | 3.76162000  | -2.67756400 |
| H | 4.10565000  | 4.26748000  | -1.10292500 |
| C | -0.48400300 | 0.43593700  | 2.31407800  |
| C | 0.62071400  | -0.50360300 | 2.85300000  |
| C | -0.43971900 | 1.75814100  | 3.11423300  |
| C | -1.85199600 | -0.23742100 | 2.56575500  |
| H | 0.63031100  | -1.46623200 | 2.32815300  |
| H | 1.62228000  | -0.07156700 | 2.77632100  |
| H | 0.43890400  | -0.71443800 | 3.91643800  |
| H | -1.28585600 | 2.41254300  | 2.88076200  |
| H | -0.49884700 | 1.53505300  | 4.18920400  |
| H | 0.47627400  | 2.33078000  | 2.94579600  |
| H | -2.00597700 | -0.36275300 | 3.64729600  |
| H | -2.68607900 | 0.35670500  | 2.17618000  |
| H | -1.91282300 | -1.22807400 | 2.10631200  |
| C | -2.27038200 | -1.70921000 | -0.50212600 |
| C | -3.46298300 | -1.59067900 | -0.30192800 |
| C | -4.84208300 | -1.34611600 | -0.05294800 |
| C | -5.77113200 | -2.40415100 | -0.00832400 |
| C | -5.29076500 | -0.02484100 | 0.14843100  |
| C | -7.11732700 | -2.14365300 | 0.23568300  |
| H | -5.42514600 | -3.42162700 | -0.16363900 |
| C | -6.63918100 | 0.22352000  | 0.38999900  |
| H | -4.57650000 | 0.78877700  | 0.10502100  |
| C | -7.55568400 | -0.83118700 | 0.43551700  |
| H | -7.82679100 | -2.96596800 | 0.27027800  |
| H | -6.97578300 | 1.24564600  | 0.54130200  |
| H | -8.60699500 | -0.63210700 | 0.62498800  |

**INT1**

|    |             |             |             |
|----|-------------|-------------|-------------|
| C  | 1.85332800  | 0.25503000  | -1.86398400 |
| C  | 1.11240400  | 0.60547500  | -0.68025800 |
| C  | -0.29083300 | 0.30963600  | -0.56633100 |
| C  | -0.90390300 | -0.27392300 | -1.69749500 |
| C  | -0.18128300 | -0.56382100 | -2.89343400 |
| C  | 1.16459900  | -0.30907300 | -2.97326600 |
| Si | -1.37851200 | 0.51357300  | 1.00095200  |

|   |             |             |             |
|---|-------------|-------------|-------------|
| C | -2.69876000 | 1.81115400  | 0.60584800  |
| C | -2.52771200 | 2.66709000  | -0.49891200 |
| C | -3.84928300 | 1.99888100  | 1.39593700  |
| C | -4.78898200 | 2.98761800  | 1.09566200  |
| C | -4.59763000 | 3.82187000  | -0.00728100 |
| C | -3.46124500 | 3.65918400  | -0.80340100 |
| H | 2.80331600  | 0.74775300  | -2.04588500 |
| H | -0.72492900 | -0.97236900 | -3.73911800 |
| H | 1.71078100  | -0.49171600 | -3.89504500 |
| H | -1.65828700 | 2.55382800  | -1.14081400 |
| H | -4.02898100 | 1.36455500  | 2.25838400  |
| H | -5.67078500 | 3.10204700  | 1.72122300  |
| H | -5.32657800 | 4.59284500  | -0.24394600 |
| H | -3.29939800 | 4.30436900  | -1.66296000 |
| O | 1.06621400  | 3.13094600  | -2.02241400 |
| S | 1.47969400  | 3.23242000  | -0.62969800 |
| O | 0.86690100  | 4.17993100  | 0.28701000  |
| O | 1.58621200  | 1.76046200  | 0.07901700  |
| C | 3.31415100  | 3.59584100  | -0.59917100 |
| F | 3.76192000  | 3.54629000  | 0.65626600  |
| F | 3.97915000  | 2.69571900  | -1.33649900 |
| F | 3.52029200  | 4.81199100  | -1.10268100 |
| C | -2.08574200 | -1.23194400 | 1.26654400  |
| C | -1.20019100 | -2.32477800 | 1.21853700  |
| C | -3.44065700 | -1.50831800 | 1.51207500  |
| C | -1.64196000 | -3.63355000 | 1.41735700  |
| H | -0.15034400 | -2.15135100 | 0.99153400  |
| C | -3.89269200 | -2.81560200 | 1.70510600  |
| H | -4.16877000 | -0.70348800 | 1.50836000  |
| C | -2.99379200 | -3.88347000 | 1.66371100  |
| H | -0.93299500 | -4.45743300 | 1.36888900  |
| H | -4.95138800 | -2.99886500 | 1.87029700  |
| H | -3.34538800 | -4.90156000 | 1.81193400  |
| C | -0.55131000 | 0.97947400  | 2.69242900  |
| C | 0.64172100  | 0.05243000  | 2.97725200  |
| C | -1.60953600 | 0.75595600  | 3.80170100  |
| C | -0.09014800 | 2.44610700  | 2.77962300  |
| H | 1.40118000  | 0.12050900  | 2.19248900  |
| H | 0.32636800  | -0.99408800 | 3.05302600  |
| H | 1.11185500  | 0.32667600  | 3.93455500  |
| H | -2.43149900 | 1.47593600  | 3.72942700  |
| H | -1.13875400 | 0.90698900  | 4.78398900  |
| H | -2.03215500 | -0.25432700 | 3.78823500  |
| H | 0.17066700  | 2.68662100  | 3.82127300  |

|    |             |             |             |
|----|-------------|-------------|-------------|
| H  | -0.87084000 | 3.14557400  | 2.46215400  |
| H  | 0.79044800  | 2.63373300  | 2.16875300  |
| C  | -2.30299100 | -0.54372200 | -1.70526400 |
| C  | -3.50438200 | -0.72471200 | -1.69587400 |
| C  | -4.91308100 | -0.84933600 | -1.53197400 |
| C  | -5.67598500 | 0.29343400  | -1.21623600 |
| C  | -5.55179900 | -2.10086000 | -1.61936600 |
| C  | -7.04566100 | 0.17770200  | -0.99189400 |
| H  | -5.18091100 | 1.25530400  | -1.13983100 |
| C  | -6.92302000 | -2.20474000 | -1.39578800 |
| H  | -4.95905100 | -2.98195100 | -1.84454000 |
| C  | -7.67385400 | -1.06810900 | -1.08101600 |
| H  | -7.62291000 | 1.06409300  | -0.74236200 |
| H  | -7.40699000 | -3.17568200 | -1.46184400 |
| H  | -8.74270900 | -1.15388300 | -0.90387500 |
| N  | 3.06114100  | -3.22892000 | -1.09865100 |
| H  | 2.93598700  | -3.86831900 | -0.31505800 |
| C  | 4.48740400  | -3.26665100 | -1.48361600 |
| C  | 4.87628600  | -2.14170400 | -2.44082900 |
| H  | 5.07564900  | -3.17388100 | -0.56172900 |
| H  | 4.74653600  | -4.24205800 | -1.93112400 |
| H  | 4.65958800  | -1.16807000 | -1.98979500 |
| H  | 4.32663100  | -2.20789100 | -3.38527100 |
| H  | 5.94603200  | -2.19782200 | -2.67140900 |
| C  | 2.14934200  | -3.67960300 | -2.17345000 |
| C  | 0.72581000  | -3.85916200 | -1.65677900 |
| H  | 2.15309200  | -2.91980600 | -2.95960600 |
| H  | 2.51690400  | -4.62166500 | -2.61724100 |
| H  | 0.07605000  | -4.22936000 | -2.45670000 |
| H  | 0.31828600  | -2.90987200 | -1.29845500 |
| H  | 0.68768200  | -4.58436700 | -0.83328900 |
| Pd | 2.28813200  | -1.09994900 | -0.24816600 |
| N  | 3.64603800  | -1.55237700 | 1.76586000  |
| H  | 4.35358900  | -2.09686500 | 1.26992900  |
| C  | 3.14193400  | -2.38553100 | 2.87467200  |
| C  | 2.48783200  | -3.66977500 | 2.37649400  |
| H  | 3.95463000  | -2.62927300 | 3.58141100  |
| H  | 2.41092300  | -1.79011600 | 3.42583800  |
| H  | 2.10002200  | -4.25318900 | 3.21814800  |
| H  | 3.21065600  | -4.30394100 | 1.84460300  |
| H  | 1.65521500  | -3.44350300 | 1.70277600  |
| C  | 4.30510700  | -0.32156700 | 2.25622300  |
| C  | 4.98263400  | 0.44777800  | 1.12774500  |
| H  | 3.53217200  | 0.29968900  | 2.71813200  |

|            |             |             |             |
|------------|-------------|-------------|-------------|
| H          | 5.04108100  | -0.56467000 | 3.04251000  |
| H          | 5.45133600  | 1.35848200  | 1.51501200  |
| H          | 4.25019300  | 0.73195500  | 0.36717900  |
| H          | 5.76291200  | -0.15660100 | 0.64638800  |
| <b>TS1</b> |             |             |             |
| C          | 1.60603000  | 0.49750600  | -2.21471500 |
| C          | 1.00128800  | 0.41329700  | -0.94571100 |
| C          | -0.37738100 | 0.29995000  | -0.70086400 |
| C          | -1.14588800 | 0.00382500  | -1.87749100 |
| C          | -0.55144100 | -0.02743800 | -3.15299700 |
| C          | 0.80854800  | 0.23142700  | -3.32044800 |
| Si         | -1.35048500 | 0.46964900  | 0.95453100  |
| C          | -2.61351400 | 1.84565400  | 0.64893000  |
| C          | -2.34535600 | 2.83211300  | -0.31935600 |
| C          | -3.78205300 | 1.99543100  | 1.41918400  |
| C          | -4.65425100 | 3.06850200  | 1.22137100  |
| C          | -4.37353600 | 4.02677600  | 0.24605900  |
| C          | -3.21238400 | 3.90669400  | -0.52179400 |
| H          | 2.64744500  | 0.76601500  | -2.31297500 |
| H          | -1.18410600 | -0.21460100 | -4.01429200 |
| H          | 1.24469800  | 0.24912700  | -4.31545500 |
| H          | -1.44758500 | 2.76422600  | -0.92863600 |
| H          | -4.02782500 | 1.26870500  | 2.18754600  |
| H          | -5.55315100 | 3.15154200  | 1.82717800  |
| H          | -5.04923200 | 4.86388800  | 0.08999200  |
| H          | -2.97731300 | 4.65237400  | -1.27669600 |
| O          | 1.81381400  | 3.35599100  | -1.72282200 |
| S          | 2.20789500  | 3.13098300  | -0.33112600 |
| O          | 2.01170800  | 4.18784100  | 0.65956800  |
| O          | 1.74741000  | 1.76238000  | 0.22246000  |
| C          | 4.05268100  | 2.85880100  | -0.37086400 |
| F          | 4.52395500  | 2.66292700  | 0.86872300  |
| F          | 4.35524500  | 1.76331700  | -1.10461800 |
| F          | 4.66925300  | 3.91109900  | -0.91002700 |
| C          | -2.13024300 | -1.24785600 | 1.18549600  |
| C          | -1.28424900 | -2.37073800 | 1.24025700  |
| C          | -3.51074100 | -1.47447700 | 1.31278400  |
| C          | -1.78782500 | -3.65905800 | 1.42725500  |
| H          | -0.21118100 | -2.23881600 | 1.10832200  |
| C          | -4.02479500 | -2.75996200 | 1.49418300  |
| H          | -4.20657200 | -0.64732500 | 1.22831000  |
| C          | -3.16421200 | -3.85731500 | 1.55747600  |
| H          | -1.10989000 | -4.50814600 | 1.45843500  |

|   |             |             |             |
|---|-------------|-------------|-------------|
| H | -5.09995300 | -2.90140300 | 1.56848400  |
| H | -3.56231200 | -4.85937900 | 1.69639000  |
| C | -0.47183500 | 0.92353500  | 2.62764000  |
| C | 0.83563500  | 0.15530900  | 2.87447900  |
| C | -1.45905100 | 0.53274100  | 3.75815300  |
| C | -0.20987800 | 2.44062600  | 2.73522000  |
| H | 1.59856600  | 0.40661700  | 2.12640900  |
| H | 0.67350300  | -0.92832800 | 2.87927500  |
| H | 1.25128800  | 0.42541700  | 3.85755800  |
| H | -2.40987000 | 1.07070500  | 3.67920900  |
| H | -1.01957500 | 0.80453000  | 4.72849700  |
| H | -1.67491400 | -0.54076800 | 3.77537000  |
| H | 0.23413600  | 2.66500000  | 3.71639700  |
| H | -1.13925000 | 3.01398800  | 2.65637700  |
| H | 0.47807300  | 2.80387700  | 1.97314900  |
| C | -2.55385700 | -0.20388200 | -1.80226000 |
| C | -3.75682300 | -0.35484100 | -1.73347200 |
| C | -5.16126900 | -0.45784500 | -1.52088100 |
| C | -5.90202500 | 0.69789100  | -1.20150600 |
| C | -5.81352800 | -1.70471400 | -1.56766900 |
| C | -7.26607900 | 0.59991600  | -0.93657400 |
| H | -5.39365100 | 1.65468400  | -1.14979700 |
| C | -7.17870300 | -1.79048300 | -1.30289000 |
| H | -5.23625200 | -2.59507200 | -1.79601300 |
| C | -7.90851800 | -0.64061800 | -0.98700600 |
| H | -7.82815300 | 1.49548300  | -0.68561500 |
| H | -7.67417800 | -2.75706100 | -1.33928200 |
| H | -8.97266100 | -0.71197400 | -0.77854300 |
| N | 3.00130300  | -2.88104500 | -1.65347100 |
| H | 2.83868800  | -3.72404200 | -1.10783700 |
| C | 4.44307800  | -2.75951800 | -1.91386700 |
| C | 4.85346600  | -1.33653100 | -2.28737500 |
| H | 4.97245000  | -3.05189000 | -0.99649500 |
| H | 4.77211600  | -3.46188100 | -2.70152900 |
| H | 4.60905500  | -0.64174600 | -1.47912900 |
| H | 4.34000900  | -0.99513900 | -3.19228600 |
| H | 5.93158800  | -1.28732100 | -2.47776800 |
| C | 2.17086400  | -2.97334700 | -2.86088600 |
| C | 0.71774800  | -3.26645500 | -2.49874000 |
| H | 2.22706300  | -2.01756200 | -3.38812100 |
| H | 2.55425500  | -3.74804200 | -3.55092100 |
| H | 0.09966400  | -3.32234200 | -3.40028400 |
| H | 0.31049900  | -2.48053500 | -1.85560100 |
| H | 0.62599700  | -4.22457000 | -1.97020400 |

|    |            |             |            |
|----|------------|-------------|------------|
| Pd | 1.96768300 | -0.91682500 | 0.12792600 |
| N  | 3.16896900 | -2.33406500 | 1.60431900 |
| H  | 3.82144600 | -2.77484200 | 0.95490400 |
| C  | 2.42001000 | -3.40686300 | 2.29441000 |
| C  | 1.85722300 | -4.43400400 | 1.31802900 |
| H  | 3.06518000 | -3.91361200 | 3.03134700 |
| H  | 1.60579900 | -2.93371800 | 2.85254200 |
| H  | 1.27755100 | -5.18986300 | 1.85743200 |
| H  | 2.66378300 | -4.95925100 | 0.78862500 |
| H  | 1.20403700 | -3.96157200 | 0.57843400 |
| C  | 3.96936800 | -1.52196600 | 2.55065400 |
| C  | 4.77436400 | -0.44855700 | 1.82664800 |
| H  | 3.27026800 | -1.05862000 | 3.25363100 |
| H  | 4.63861300 | -2.17191500 | 3.13843600 |
| H  | 5.39098000 | 0.11083800  | 2.53788400 |
| H  | 4.11933100 | 0.26662400  | 1.31995200 |
| H  | 5.44195000 | -0.89034200 | 1.07591900 |

## INT2

|    |             |            |             |
|----|-------------|------------|-------------|
| C  | 1.20984900  | 0.76720500 | -2.32453800 |
| C  | 0.73742000  | 0.32819600 | -1.07892200 |
| C  | -0.63514700 | 0.36736200 | -0.74873100 |
| C  | -1.51888900 | 0.55987100 | -1.86940100 |
| C  | -1.03732000 | 0.90167400 | -3.14586100 |
| C  | 0.32535400  | 1.07579400 | -3.35413100 |
| Si | -1.46061200 | 0.45364900 | 1.01208000  |
| C  | -2.83736300 | 1.75958700 | 0.88012800  |
| C  | -2.67658900 | 2.91706300 | 0.09524600  |
| C  | -3.99453200 | 1.67372900 | 1.67504700  |
| C  | -4.95446100 | 2.68907300 | 1.67996000  |
| C  | -4.77728800 | 3.82311700 | 0.88543300  |
| C  | -3.63214300 | 3.93375800 | 0.09187500  |
| H  | 2.27396500  | 0.86708700 | -2.49339300 |
| H  | -1.74977800 | 1.04342500 | -3.95249300 |
| H  | 0.70059700  | 1.41064200 | -4.31769900 |
| H  | -1.79644700 | 3.02402300 | -0.53310100 |
| H  | -4.15400700 | 0.80310200 | 2.30513200  |
| H  | -5.84062700 | 2.59083400 | 2.30224000  |
| H  | -5.52127600 | 4.61590200 | 0.88725800  |
| H  | -3.48105200 | 4.81394200 | -0.52794700 |
| O  | 2.50602200  | 2.91629000 | -0.62418000 |
| S  | 3.48369500  | 2.32529100 | 0.29257800  |
| O  | 4.07103700  | 3.14065500 | 1.35556700  |
| O  | 3.09211300  | 0.94530900 | 0.83060200  |

|   |             |             |             |
|---|-------------|-------------|-------------|
| C | 4.91376000  | 1.90840800  | -0.82847700 |
| F | 5.93541900  | 1.37007200  | -0.14132500 |
| F | 4.53127000  | 1.00658400  | -1.77137600 |
| F | 5.35054300  | 2.99940700  | -1.45766100 |
| C | -2.25663000 | -1.20197400 | 1.51739300  |
| C | -1.58052500 | -2.15275500 | 2.30534200  |
| C | -3.53887900 | -1.55864600 | 1.05534300  |
| C | -2.13582200 | -3.40143000 | 2.59395900  |
| H | -0.60031300 | -1.92536400 | 2.70156500  |
| C | -4.10307800 | -2.80334800 | 1.33865200  |
| H | -4.11124900 | -0.85529800 | 0.46642900  |
| C | -3.39930900 | -3.73568800 | 2.10371800  |
| H | -1.58139400 | -4.10989200 | 3.20533600  |
| H | -5.09372600 | -3.03874900 | 0.95726200  |
| H | -3.83433000 | -4.70741600 | 2.32376300  |
| C | -0.33164900 | 1.16074500  | 2.41729900  |
| C | 0.81363000  | 0.23250600  | 2.86835700  |
| C | -1.20574300 | 1.44245400  | 3.66310200  |
| C | 0.25002400  | 2.49920700  | 1.90962400  |
| H | 1.30245800  | -0.26433200 | 2.02704500  |
| H | 0.45976400  | -0.53783500 | 3.56201400  |
| H | 1.58980900  | 0.81055300  | 3.38602200  |
| H | -1.98046100 | 2.18923300  | 3.46728600  |
| H | -0.56870800 | 1.82900500  | 4.47152400  |
| H | -1.69631900 | 0.53333500  | 4.03451400  |
| H | 0.95099800  | 2.91178500  | 2.64791600  |
| H | -0.53961400 | 3.24160600  | 1.75326700  |
| H | 0.79211800  | 2.38987100  | 0.97034500  |
| C | -2.92894900 | 0.35389000  | -1.77506700 |
| C | -4.12416100 | 0.13453800  | -1.79867400 |
| C | -5.52579400 | -0.08709800 | -1.66164000 |
| C | -6.35051600 | 0.93115700  | -1.14259600 |
| C | -6.09541900 | -1.33343100 | -1.98828800 |
| C | -7.71232400 | 0.70123600  | -0.96092300 |
| H | -5.90621700 | 1.88335700  | -0.87405600 |
| C | -7.45886200 | -1.55271300 | -1.80253900 |
| H | -5.45720100 | -2.11990500 | -2.37985500 |
| C | -8.27103000 | -0.53726400 | -1.28947600 |
| H | -8.33935500 | 1.49123000  | -0.55628300 |
| H | -7.88868800 | -2.51783200 | -2.05728200 |
| H | -9.33369800 | -0.71169800 | -1.14406300 |
| N | 1.62346300  | -2.54365200 | -1.25787300 |
| H | 1.54618400  | -3.22723400 | -0.50295100 |
| C | 2.78680800  | -2.96753000 | -2.09575400 |

|    |             |             |             |
|----|-------------|-------------|-------------|
| C  | 3.12242600  | -1.99142300 | -3.21691700 |
| H  | 3.65396500  | -3.07832000 | -1.44144700 |
| H  | 2.56642500  | -3.96050500 | -2.51610100 |
| H  | 3.47281500  | -1.03860300 | -2.81520700 |
| H  | 2.25672400  | -1.79282200 | -3.85531600 |
| H  | 3.91683100  | -2.41659300 | -3.83981300 |
| C  | 0.34134000  | -2.63179300 | -2.02999100 |
| C  | -0.81662500 | -3.02046100 | -1.12707300 |
| H  | 0.16212400  | -1.66950700 | -2.50702200 |
| H  | 0.46780200  | -3.37925100 | -2.82565300 |
| H  | -1.76135900 | -2.96803800 | -1.67611000 |
| H  | -0.89756700 | -2.34053600 | -0.28104600 |
| H  | -0.70172700 | -4.04159400 | -0.74075900 |
| Pd | 2.15590000  | -0.70877500 | -0.10896700 |
| N  | 3.73630500  | -2.03958600 | 1.05552300  |
| H  | 3.81092700  | -2.94870000 | 0.59458400  |
| C  | 3.24559100  | -2.30720000 | 2.43014900  |
| C  | 2.00548300  | -3.19470300 | 2.41266600  |
| H  | 4.03764600  | -2.79238100 | 3.02186900  |
| H  | 3.03578600  | -1.34222400 | 2.89775300  |
| H  | 1.64046100  | -3.36398600 | 3.43073100  |
| H  | 2.23000700  | -4.17773900 | 1.97535700  |
| H  | 1.19402300  | -2.73868600 | 1.83947000  |
| C  | 5.10138200  | -1.44939500 | 1.06119800  |
| C  | 5.78958700  | -1.62417500 | -0.28730000 |
| H  | 4.99664500  | -0.39285200 | 1.30999400  |
| H  | 5.70525400  | -1.92721900 | 1.84808000  |
| H  | 6.77502700  | -1.15083800 | -0.26788800 |
| H  | 5.21461900  | -1.15538100 | -1.08794000 |
| H  | 5.93171300  | -2.68690600 | -0.52655600 |

### INT3

|    |             |             |             |
|----|-------------|-------------|-------------|
| C  | -0.27034800 | -2.65558100 | -1.75256900 |
| C  | -0.08231400 | -1.53322000 | -0.93558900 |
| C  | 1.21951000  | -1.10368400 | -0.58623600 |
| C  | 2.32011000  | -1.90436500 | -1.01485400 |
| C  | 2.10823500  | -3.05498800 | -1.80146100 |
| C  | 0.82363600  | -3.41234200 | -2.18318100 |
| Si | 1.39819600  | 0.51291800  | 0.40212500  |
| H  | -1.26127600 | -2.94188900 | -2.08251000 |
| H  | 2.96554400  | -3.64205700 | -2.11557300 |
| H  | 0.66449300  | -4.28050300 | -2.81802000 |
| C  | -0.17406500 | 1.48274800  | -0.08443400 |
| C  | -0.73035800 | 2.51215400  | 0.71770000  |



|    |             |             |             |
|----|-------------|-------------|-------------|
| C  | -0.68805600 | 1.35680900  | -1.41207100 |
| C  | -1.73786900 | 3.33595900  | 0.24525400  |
| H  | -0.36732300 | 2.66556400  | 1.72551900  |
| C  | -1.71772700 | 2.20280200  | -1.88382600 |
| H  | -0.18234100 | 0.72117800  | -2.13297300 |
| C  | -2.23989200 | 3.18211900  | -1.05826800 |
| H  | -2.15936600 | 4.09757300  | 0.89423400  |
| H  | -2.08255700 | 2.08060300  | -2.89943900 |
| H  | -3.03839800 | 3.82626300  | -1.40857300 |
| C  | 3.66676300  | -1.58299900 | -0.68079600 |
| C  | 4.83084700  | -1.34591600 | -0.42323800 |
| C  | 6.16984200  | -0.98784500 | -0.10152100 |
| C  | 7.20053300  | -1.94834100 | -0.11368000 |
| C  | 6.47606300  | 0.34734100  | 0.23159800  |
| C  | 8.50540000  | -1.57932800 | 0.20385500  |
| H  | 6.96486800  | -2.97660900 | -0.37099000 |
| C  | 7.78434800  | 0.70485200  | 0.54610900  |
| H  | 5.68478200  | 1.08741900  | 0.23225800  |
| C  | 8.80190900  | -0.25370100 | 0.53468900  |
| H  | 9.29359100  | -2.32726300 | 0.19337500  |
| H  | 8.01021700  | 1.73733600  | 0.79899900  |
| H  | 9.82139200  | 0.03023900  | 0.78121600  |
| Pd | -1.66645700 | -0.52311500 | -0.22932700 |
| O  | -5.32460400 | -0.37910000 | 1.43000300  |
| S  | -4.66521900 | 0.87536000  | 1.01484400  |
| O  | -3.17459200 | 0.73046000  | 0.82635600  |
| O  | -5.02774600 | 2.11134100  | 1.71027500  |
| C  | -5.27216300 | 1.11694600  | -0.73789200 |
| F  | -5.07410100 | 2.37427100  | -1.15878900 |
| F  | -6.57681600 | 0.84060600  | -0.82668700 |
| F  | -4.61109800 | 0.28933100  | -1.58341400 |
| C  | 2.80727000  | 1.58736200  | -0.26119000 |
| C  | 3.43054600  | 2.58261600  | 0.51297700  |
| C  | 3.18574300  | 1.48680400  | -1.61337000 |
| C  | 4.39126300  | 3.43780200  | -0.03399600 |
| H  | 3.17382700  | 2.70033500  | 1.56065300  |
| C  | 4.14978000  | 2.33079900  | -2.16456100 |
| H  | 2.73386900  | 0.72437800  | -2.24278000 |
| C  | 4.75640100  | 3.31094600  | -1.37514700 |
| H  | 4.85641700  | 4.19704300  | 0.58962700  |
| H  | 4.43192800  | 2.22036800  | -3.20827100 |
| H  | 5.50842000  | 3.96895700  | -1.80233200 |
| C  | 1.56180800  | 0.11010200  | 2.28695400  |
| C  | 1.31002100  | 1.29754000  | 3.24434800  |

|   |             |             |             |
|---|-------------|-------------|-------------|
| C | 0.54423100  | -0.99117600 | 2.65343900  |
| C | 2.98994800  | -0.43058600 | 2.53227900  |
| H | 1.90370500  | 2.18644000  | 3.00940200  |
| H | 0.25532900  | 1.58797400  | 3.26244000  |
| H | 1.57268200  | 0.99764800  | 4.26868700  |
| H | 0.67158700  | -1.88980000 | 2.03973900  |
| H | 0.66910000  | -1.28144000 | 3.70653200  |
| H | -0.48498800 | -0.63441800 | 2.52986600  |
| H | 3.10275200  | -0.70377900 | 3.59116500  |
| H | 3.20042100  | -1.32236400 | 1.93499100  |
| H | 3.76120700  | 0.31036700  | 2.29515000  |
| N | -2.66144500 | -2.40014800 | 0.26784400  |
| H | -2.00796900 | -3.12520000 | -0.03368300 |
| C | -2.79190600 | -2.49848800 | 1.75766500  |
| C | -3.30383200 | -3.85030500 | 2.26151500  |
| H | -3.45096500 | -1.68742300 | 2.07061500  |
| H | -1.79700000 | -2.31127600 | 2.16498200  |
| H | -3.20400400 | -3.88337700 | 3.35175300  |
| H | -4.35895800 | -4.01233700 | 2.02479400  |
| H | -2.71925600 | -4.68258000 | 1.84772400  |
| C | -3.96286300 | -2.61034900 | -0.43876300 |
| C | -3.84401400 | -2.60677000 | -1.95759800 |
| H | -4.63354200 | -1.82557000 | -0.09308600 |
| H | -4.38607300 | -3.56879400 | -0.11479700 |
| H | -4.84821200 | -2.63643500 | -2.39255000 |
| H | -3.34949500 | -1.70090200 | -2.32002500 |
| H | -3.29760800 | -3.48174800 | -2.32914500 |

**TS2**

|    |             |             |             |
|----|-------------|-------------|-------------|
| C  | -0.38197800 | -1.90539200 | -2.59179700 |
| C  | -0.16504700 | -0.94248400 | -1.59618100 |
| C  | 1.09939500  | -0.74747900 | -0.99552800 |
| C  | 2.12267000  | -1.67822900 | -1.34114200 |
| C  | 1.87550600  | -2.69067600 | -2.29193400 |
| C  | 0.64476800  | -2.78536600 | -2.93385900 |
| Si | 1.42586900  | 0.78750900  | 0.11341900  |
| H  | -1.34635100 | -1.97291100 | -3.08115000 |
| H  | 2.67631500  | -3.38217700 | -2.53544500 |
| H  | 0.48428800  | -3.54475600 | -3.69441000 |
| C  | 0.02533900  | 1.98142400  | -0.34117200 |
| C  | 0.17277300  | 3.37364400  | -0.19661200 |
| C  | -1.17262800 | 1.51743300  | -0.90393900 |
| C  | -0.83874900 | 4.24636800  | -0.59744300 |
| H  | 1.09149900  | 3.77960700  | 0.21881000  |

|    |             |             |             |
|----|-------------|-------------|-------------|
| C  | -2.17617900 | 2.38217300  | -1.35575900 |
| H  | -0.82129700 | 0.33626600  | -1.67610700 |
| C  | -2.01051500 | 3.75491300  | -1.18291600 |
| H  | -0.70780200 | 5.31757500  | -0.46841000 |
| H  | -3.08454200 | 1.99149700  | -1.79900200 |
| H  | -2.79285300 | 4.43814400  | -1.50150200 |
| C  | 3.41987200  | -1.61190800 | -0.75783900 |
| C  | 4.54115100  | -1.55702900 | -0.29226600 |
| C  | 5.83971100  | -1.39727600 | 0.26873300  |
| C  | 6.66537300  | -2.51023200 | 0.51969100  |
| C  | 6.30908400  | -0.10404100 | 0.57659500  |
| C  | 7.93152700  | -2.33080900 | 1.07155200  |
| H  | 6.30284200  | -3.50574700 | 0.28191600  |
| C  | 7.57701700  | 0.06269300  | 1.12681300  |
| H  | 5.67599800  | 0.75196000  | 0.37450300  |
| C  | 8.39074400  | -1.04622900 | 1.37701500  |
| H  | 8.56168600  | -3.19464900 | 1.26446900  |
| H  | 7.93136400  | 1.06318100  | 1.35961800  |
| H  | 9.37916000  | -0.91067100 | 1.80746200  |
| Pd | -1.83040600 | -0.42062000 | -0.40120100 |
| O  | -5.07733100 | -0.97633300 | 1.65193300  |
| S  | -4.53594300 | 0.39170600  | 1.53972200  |
| O  | -3.06152500 | 0.43233000  | 1.18443400  |
| O  | -4.88814200 | 1.36257800  | 2.57426000  |
| C  | -5.32381400 | 1.03739200  | -0.02151100 |
| F  | -5.01955300 | 2.32636800  | -0.22614300 |
| F  | -6.65173600 | 0.91119900  | 0.02917700  |
| F  | -4.87843100 | 0.33379600  | -1.09758300 |
| C  | 3.00773700  | 1.66330000  | -0.44546900 |
| C  | 3.66831000  | 2.59194400  | 0.38114800  |
| C  | 3.51005300  | 1.48693800  | -1.74802300 |
| C  | 4.78448300  | 3.30447300  | -0.06589600 |
| H  | 3.31815000  | 2.76707100  | 1.39362500  |
| C  | 4.62948200  | 2.18726600  | -2.19853500 |
| H  | 3.02951600  | 0.78124500  | -2.42017200 |
| C  | 5.27254500  | 3.09824700  | -1.35719600 |
| H  | 5.27379300  | 4.01353100  | 0.59700900  |
| H  | 5.00194600  | 2.01976100  | -3.20569800 |
| H  | 6.14542900  | 3.64343800  | -1.70623800 |
| C  | 1.41679800  | 0.39316000  | 2.00391400  |
| C  | 1.01791900  | 1.65572000  | 2.80295300  |
| C  | 0.36958700  | -0.69852000 | 2.29908000  |
| C  | 2.79653700  | -0.11302100 | 2.47799100  |
| H  | 1.72145100  | 2.48566700  | 2.67044000  |

|   |             |             |             |
|---|-------------|-------------|-------------|
| H | 0.02140000  | 2.01373600  | 2.52393900  |
| H | 0.99911400  | 1.41868100  | 3.87583600  |
| H | 0.58819300  | -1.62236800 | 1.75045400  |
| H | 0.37364600  | -0.93854600 | 3.37196600  |
| H | -0.64625300 | -0.37346400 | 2.04578000  |
| H | 2.76648400  | -0.29806200 | 3.56117900  |
| H | 3.07430200  | -1.05074100 | 1.98738900  |
| H | 3.60053600  | 0.60467800  | 2.28755400  |
| N | -2.49701900 | -2.51838500 | -0.06497700 |
| H | -1.80550500 | -3.06944700 | -0.57847600 |
| C | -2.40377300 | -2.89594900 | 1.37726100  |
| C | -2.60347300 | -4.38603800 | 1.66661300  |
| H | -3.13849100 | -2.28803600 | 1.90752200  |
| H | -1.41174800 | -2.59191800 | 1.71543200  |
| H | -2.37831600 | -4.58182200 | 2.72068700  |
| H | -3.63089400 | -4.71484200 | 1.48564300  |
| H | -1.92886500 | -5.00604300 | 1.06101000  |
| C | -3.83977500 | -2.80432500 | -0.65003400 |
| C | -3.90609100 | -2.52658200 | -2.14718000 |
| H | -4.55430300 | -2.18600500 | -0.10635300 |
| H | -4.10253800 | -3.85451100 | -0.46993900 |
| H | -4.92155200 | -2.72136700 | -2.50793200 |
| H | -3.66629500 | -1.48228000 | -2.37111300 |
| H | -3.22346600 | -3.17478300 | -2.71049100 |

#### **INT4**

|    |             |             |             |
|----|-------------|-------------|-------------|
| C  | -0.40199700 | -0.58935500 | -3.43221000 |
| C  | -0.09660400 | 0.29686400  | -2.37269800 |
| C  | 0.84877400  | -0.03519900 | -1.35291900 |
| C  | 1.52191600  | -1.29432700 | -1.49848200 |
| C  | 1.18070200  | -2.17115800 | -2.54061400 |
| C  | 0.21460800  | -1.82910200 | -3.49766400 |
| Si | 1.31192100  | 1.29100300  | -0.02255000 |
| H  | -1.11340400 | -0.28079200 | -4.19162000 |
| H  | 1.71222500  | -3.11474000 | -2.62126300 |
| H  | -0.01586600 | -2.52138100 | -4.30240100 |
| C  | -0.12028200 | 2.49488000  | -0.21137100 |
| C  | -0.02273300 | 3.89743300  | -0.16935200 |
| C  | -1.39677300 | 1.92757800  | -0.33379500 |
| C  | -1.16603400 | 4.69499200  | -0.23289500 |
| H  | 0.95469800  | 4.36819600  | -0.09644200 |
| C  | -2.55016600 | 2.70759700  | -0.39003100 |
| H  | -0.44400200 | 1.32052200  | -2.46490900 |
| C  | -2.42580100 | 4.10105100  | -0.33799500 |

|    |             |             |             |
|----|-------------|-------------|-------------|
| H  | -1.07587300 | 5.77762900  | -0.20006100 |
| H  | -3.53242500 | 2.25670800  | -0.46287300 |
| H  | -3.32000200 | 4.71839500  | -0.37753600 |
| C  | 2.65032200  | -1.61138200 | -0.69007200 |
| C  | 3.70550400  | -1.82690400 | -0.12535800 |
| C  | 4.95920900  | -1.98590400 | 0.53119900  |
| C  | 5.36214100  | -3.23493400 | 1.04060400  |
| C  | 5.81226600  | -0.87089000 | 0.67098800  |
| C  | 6.59212900  | -3.36284300 | 1.68135900  |
| H  | 4.70304200  | -4.09102800 | 0.93362100  |
| C  | 7.03956900  | -1.01192000 | 1.31272500  |
| H  | 5.50078100  | 0.08936100  | 0.27106400  |
| C  | 7.43226600  | -2.25427400 | 1.81980200  |
| H  | 6.89532100  | -4.32860600 | 2.07582100  |
| H  | 7.69138400  | -0.14923300 | 1.41832300  |
| H  | 8.39007400  | -2.35843300 | 2.32195300  |
| Pd | -1.58958200 | -0.06005300 | -0.54928900 |
| O  | -4.06655400 | -1.96723500 | 1.59479100  |
| S  | -3.93006300 | -0.52707800 | 1.87396900  |
| O  | -2.64060100 | 0.08598000  | 1.34170200  |
| O  | -4.24226400 | -0.04381400 | 3.21694500  |
| C  | -5.20455600 | 0.25113100  | 0.75923500  |
| F  | -5.31015300 | 1.56701900  | 0.98416600  |
| F  | -6.39944300 | -0.31600500 | 0.93689000  |
| F  | -4.84786100 | 0.08209200  | -0.54083900 |
| C  | 2.95189700  | 2.07514500  | -0.53563900 |
| C  | 3.46873100  | 3.17559000  | 0.17686500  |
| C  | 3.71417900  | 1.58132000  | -1.60893800 |
| C  | 4.69337500  | 3.75268200  | -0.16174900 |
| H  | 2.91498100  | 3.58619400  | 1.01838000  |
| C  | 4.94433100  | 2.14966600  | -1.94968600 |
| H  | 3.35318200  | 0.73461900  | -2.18588600 |
| C  | 5.43797800  | 3.23620300  | -1.22505800 |
| H  | 5.06826200  | 4.60025500  | 0.40612900  |
| H  | 5.51601200  | 1.74300800  | -2.78003900 |
| H  | 6.39474600  | 3.67964600  | -1.48815300 |
| C  | 1.37173900  | 0.69792600  | 1.83712300  |
| C  | 0.58260600  | 1.72371600  | 2.68760600  |
| C  | 0.72243000  | -0.68467900 | 2.04861300  |
| C  | 2.82180800  | 0.63937800  | 2.36325000  |
| H  | 0.96730900  | 2.74548500  | 2.57626500  |
| H  | -0.48082500 | 1.73489000  | 2.43057300  |
| H  | 0.66795000  | 1.45334600  | 3.74921400  |
| H  | 1.24132600  | -1.47032300 | 1.49108300  |

|   |             |             |             |
|---|-------------|-------------|-------------|
| H | 0.77389900  | -0.95013800 | 3.11427600  |
| H | -0.33625500 | -0.68756100 | 1.77545400  |
| H | 2.81326600  | 0.30998000  | 3.41166300  |
| H | 3.43680300  | -0.06716600 | 1.80280200  |
| H | 3.32090400  | 1.61259900  | 2.33077400  |
| N | -1.86527200 | -2.29607700 | -0.92955900 |
| H | -1.22340400 | -2.46977500 | -1.70343200 |
| C | -1.38588100 | -3.10837200 | 0.22321700  |
| C | -1.25105300 | -4.60729600 | -0.05964900 |
| H | -2.06863900 | -2.92085700 | 1.05325900  |
| H | -0.40797900 | -2.70571200 | 0.49709500  |
| H | -0.77890000 | -5.09956900 | 0.79772700  |
| H | -2.21819900 | -5.09170300 | -0.22417900 |
| H | -0.61922800 | -4.78979000 | -0.93952200 |
| C | -3.23058200 | -2.65610300 | -1.39908400 |
| C | -3.61196000 | -1.89509100 | -2.66570400 |
| H | -3.91823200 | -2.42984600 | -0.58434100 |
| H | -3.29048900 | -3.73496800 | -1.59625600 |
| H | -4.62489300 | -2.17471500 | -2.97414900 |
| H | -3.59715500 | -0.81306400 | -2.50146500 |
| H | -2.93050500 | -2.12513300 | -3.49376700 |

#### INT5

|   |             |             |             |
|---|-------------|-------------|-------------|
| C | 1.38295900  | -0.27829400 | -1.60137800 |
| C | 1.86641700  | -0.74722900 | -2.84968500 |
| C | -0.00672200 | -0.26992800 | -1.42612100 |
| C | 1.01522700  | -1.11238700 | -3.88801500 |
| H | 2.93802900  | -0.84524500 | -3.00181100 |
| C | -0.87216600 | -0.62915400 | -2.46782400 |
| C | -0.36556800 | -1.03546900 | -3.70228600 |
| H | 1.42691500  | -1.46335600 | -4.83048400 |
| H | -1.94509200 | -0.62683100 | -2.31558700 |
| H | -1.04895400 | -1.31957700 | -4.49871300 |
| C | 2.37124600  | 0.75791000  | 1.35237600  |
| C | 1.27626100  | 1.56894100  | 1.74699700  |
| C | 3.33867000  | 0.48213600  | 2.33216500  |
| C | 1.21194000  | 2.13294700  | 3.03522800  |
| C | 3.25940300  | 1.01125200  | 3.62311300  |
| C | 2.20643800  | 1.85968300  | 3.96933600  |
| H | 0.37113100  | 2.76990500  | 3.29343600  |
| H | 4.02818300  | 0.77149800  | 4.35251600  |
| H | 2.15120600  | 2.29441800  | 4.96321300  |
| C | 0.17101000  | 1.78092600  | 0.86231900  |
| C | -0.75798500 | 2.15044000  | 0.12120300  |

|    |             |             |             |
|----|-------------|-------------|-------------|
| H  | 4.18374200  | -0.15089600 | 2.07838900  |
| Pd | -0.94343600 | -0.03486600 | 0.33327500  |
| O  | -2.38921900 | -4.39726500 | 0.28915200  |
| S  | -2.57771800 | -2.96072600 | 0.46243400  |
| O  | -3.29565800 | -2.49202200 | 1.67104400  |
| O  | -1.31655500 | -2.16364800 | 0.17298600  |
| C  | -3.69635700 | -2.42738700 | -0.92620400 |
| F  | -4.91267400 | -2.95639900 | -0.77992400 |
| F  | -3.81935700 | -1.07632900 | -0.91974500 |
| F  | -3.20108300 | -2.79142400 | -2.11415800 |
| Si | 2.77628600  | 0.29492700  | -0.45189000 |
| C  | -1.65348900 | 3.00087200  | -0.61263900 |
| C  | -2.19258900 | 4.13246000  | 0.02892000  |
| C  | -2.00522900 | 2.72288400  | -1.94524000 |
| C  | -3.06843800 | 4.97040000  | -0.65634200 |
| H  | -1.92149800 | 4.33998400  | 1.05960800  |
| C  | -2.87987200 | 3.56988400  | -2.62124600 |
| H  | -1.58794400 | 1.84921000  | -2.43255500 |
| C  | -3.41583900 | 4.69098100  | -1.98110900 |
| H  | -3.48221500 | 5.84085600  | -0.15518100 |
| H  | -3.14658900 | 3.35120800  | -3.65125600 |
| H  | -4.10295600 | 5.34394300  | -2.51173000 |
| C  | 3.97296800  | -1.16635200 | -0.35933200 |
| C  | 5.37449600  | -1.05551800 | -0.31571400 |
| C  | 3.41705900  | -2.45859600 | -0.26819000 |
| C  | 6.18909100  | -2.18373000 | -0.18907000 |
| H  | 5.84733000  | -0.08039500 | -0.38358900 |
| C  | 4.22547200  | -3.58811700 | -0.13534700 |
| H  | 2.33754800  | -2.58595300 | -0.31171700 |
| C  | 5.61534700  | -3.45287100 | -0.09696100 |
| H  | 7.27001800  | -2.07031400 | -0.16385700 |
| H  | 3.76995600  | -4.57247200 | -0.06682200 |
| H  | 6.24726800  | -4.33172700 | 0.00187800  |
| C  | 3.55919700  | 1.91024600  | -1.19535100 |
| C  | 4.55428400  | 2.55768000  | -0.20571900 |
| H  | 4.97162000  | 3.47406700  | -0.64715500 |
| H  | 4.07182200  | 2.83479000  | 0.73739400  |
| H  | 5.39864900  | 1.90331600  | 0.03779500  |
| C  | 4.28969800  | 1.62040800  | -2.52498000 |
| H  | 3.59471400  | 1.29362000  | -3.30476200 |
| H  | 4.77578900  | 2.53768100  | -2.88753800 |
| H  | 5.06570000  | 0.85387500  | -2.42125800 |
| C  | 2.43292700  | 2.93103900  | -1.47566600 |
| H  | 1.66867500  | 2.52541500  | -2.14792400 |

|   |             |             |             |
|---|-------------|-------------|-------------|
| H | 1.93314500  | 3.25307100  | -0.55580400 |
| H | 2.85472400  | 3.82947800  | -1.94900900 |
| N | -2.13242000 | 0.04128500  | 2.28010700  |
| H | -2.69655500 | -0.80617300 | 2.14211300  |
| C | -1.34969900 | -0.17234000 | 3.52042400  |
| C | -0.38694400 | -1.35034400 | 3.40548300  |
| H | -2.04481100 | -0.33579500 | 4.35911700  |
| H | -0.79880100 | 0.74764100  | 3.73393400  |
| H | 0.09544700  | -1.53090700 | 4.37223800  |
| H | -0.91932300 | -2.25710800 | 3.10463100  |
| H | 0.39764400  | -1.15382200 | 2.66770500  |
| C | -3.05247000 | 1.19227400  | 2.39691600  |
| C | -4.10511900 | 1.19250600  | 1.29174600  |
| H | -2.45204100 | 2.10948900  | 2.35838000  |
| H | -3.54814900 | 1.17152600  | 3.38047900  |
| H | -4.78632500 | 2.04004600  | 1.42174000  |
| H | -3.64653300 | 1.27691700  | 0.30298100  |
| H | -4.69124000 | 0.26801100  | 1.31349100  |

### TS3

|    |             |             |             |
|----|-------------|-------------|-------------|
| C  | -1.52958900 | 0.94301300  | -1.55937200 |
| C  | -1.82475100 | 1.75580700  | -2.66972600 |
| C  | -0.44651400 | 0.06322500  | -1.71210800 |
| C  | -1.10953100 | 1.66592100  | -3.86624700 |
| H  | -2.63471700 | 2.47271800  | -2.61087100 |
| C  | 0.21795200  | -0.11381800 | -2.92807500 |
| C  | -0.10246300 | 0.71291100  | -4.00805200 |
| H  | -1.36310900 | 2.32067000  | -4.69546800 |
| H  | 0.99802200  | -0.86265700 | -3.03049500 |
| H  | 0.43371400  | 0.60899800  | -4.94767200 |
| C  | -3.21250700 | -1.10924600 | -0.32605800 |
| C  | -2.23196300 | -2.09509700 | -0.59747700 |
| C  | -4.54701200 | -1.54328400 | -0.26317000 |
| C  | -2.60039600 | -3.43798100 | -0.81896500 |
| C  | -4.91443700 | -2.87307500 | -0.47608600 |
| C  | -3.93487900 | -3.82437100 | -0.76217300 |
| H  | -1.82661000 | -4.17206600 | -1.02555100 |
| H  | -5.96065900 | -3.16147200 | -0.42196900 |
| H  | -4.20519500 | -4.86195700 | -0.93804400 |
| H  | -5.33058200 | -0.82812600 | -0.04368600 |
| Pd | 0.87068500  | -0.44030700 | -0.20910500 |
| O  | 1.24220400  | 1.76433800  | -0.15269500 |
| S  | 2.18288800  | 2.69191800  | 0.57689300  |
| O  | 3.27249100  | 1.97599100  | 1.28731500  |



|    |             |             |             |
|----|-------------|-------------|-------------|
| O  | 1.51202200  | 3.77345200  | 1.30528100  |
| C  | 3.02854600  | 3.52500000  | -0.85592800 |
| F  | 3.60906300  | 2.60680200  | -1.65112700 |
| F  | 3.97214700  | 4.36449800  | -0.41624600 |
| F  | 2.13869200  | 4.20974500  | -1.58297200 |
| Si | -2.70514300 | 0.71127300  | -0.09131100 |
| C  | -0.79769200 | -1.86276900 | -0.59382400 |
| C  | 0.34720500  | -2.40680600 | -0.45532700 |
| C  | 1.11268000  | -3.62493400 | -0.29618000 |
| C  | 0.77982600  | -4.52762800 | 0.73071900  |
| C  | 2.17390300  | -3.93055800 | -1.16472000 |
| C  | 1.49976700  | -5.71181800 | 0.88140000  |
| H  | -0.03920100 | -4.28657300 | 1.40177600  |
| C  | 2.88550500  | -5.11925100 | -1.01143300 |
| H  | 2.43376800  | -3.22800000 | -1.95083000 |
| C  | 2.55326200  | -6.01035100 | 0.01277500  |
| H  | 1.23862300  | -6.40145100 | 1.67922200  |
| H  | 3.70270500  | -5.34817500 | -1.68961000 |
| H  | 3.11321000  | -6.93328300 | 0.13372300  |
| N  | 2.67454000  | -0.79837000 | 1.04976300  |
| H  | 2.89492400  | 0.18111000  | 1.27624200  |
| C  | 3.86070700  | -1.33930700 | 0.34149000  |
| C  | 4.13069500  | -0.62046500 | -0.97511400 |
| H  | 4.73596800  | -1.24474300 | 1.00207500  |
| H  | 3.69505300  | -2.40727200 | 0.17498500  |
| H  | 5.05059000  | -1.00529600 | -1.42974800 |
| H  | 4.24321200  | 0.45462400  | -0.81858500 |
| H  | 3.30862900  | -0.77214300 | -1.68489800 |
| C  | 2.43395700  | -1.51496700 | 2.32521300  |
| C  | 1.37221400  | -0.82050900 | 3.16585500  |
| H  | 2.13635200  | -2.54048700 | 2.08279900  |
| H  | 3.38060400  | -1.57418000 | 2.88463300  |
| H  | 1.24321800  | -1.34138100 | 4.12078500  |
| H  | 0.40480300  | -0.80111300 | 2.65628200  |
| H  | 1.65408600  | 0.21535200  | 3.37791700  |
| C  | -4.20037600 | 1.93629000  | -0.11929000 |
| C  | -5.05665700 | 1.74137400  | 1.15658300  |
| C  | -3.64427000 | 3.38116300  | -0.06685900 |
| C  | -5.11311300 | 1.78278400  | -1.35650000 |
| H  | -5.51663000 | 0.74917300  | 1.21847300  |
| H  | -4.46697100 | 1.88698400  | 2.06709500  |
| H  | -5.87320300 | 2.47746000  | 1.16562600  |
| H  | -3.01928900 | 3.63481700  | -0.92869600 |
| H  | -4.47858200 | 4.09681300  | -0.04445100 |

|   |             |             |             |
|---|-------------|-------------|-------------|
| H | -3.04501900 | 3.54860000  | 0.83451100  |
| H | -5.92982000 | 2.51733200  | -1.30695800 |
| H | -4.58314700 | 1.94939700  | -2.29858900 |
| H | -5.57047400 | 0.79035600  | -1.41843300 |
| C | -1.91094100 | 0.87885200  | 1.60451200  |
| C | -1.05600600 | 1.95413800  | 1.90349300  |
| C | -2.30282100 | 0.03089500  | 2.65826400  |
| C | -0.60878900 | 2.18071000  | 3.20640600  |
| H | -0.71307200 | 2.61471700  | 1.11702400  |
| C | -1.87105300 | 0.26248800  | 3.96591500  |
| H | -2.95942400 | -0.81324200 | 2.45761800  |
| C | -1.02566900 | 1.34096300  | 4.24163700  |
| H | 0.07275200  | 3.00528400  | 3.39092000  |
| H | -2.18909300 | -0.40019800 | 4.76723400  |
| H | -0.68453100 | 1.51817400  | 5.25859700  |

#### INT6

|    |             |             |             |
|----|-------------|-------------|-------------|
| C  | 1.11521800  | -1.73146400 | -1.33889900 |
| C  | 0.36252100  | -2.77520700 | -1.86663200 |
| C  | 0.82384600  | -0.40865500 | -1.79143700 |
| C  | -0.66346900 | -2.55752600 | -2.80741100 |
| H  | 0.54842000  | -3.79405000 | -1.54592200 |
| C  | -0.16844600 | -0.19556000 | -2.78645300 |
| C  | -0.92121500 | -1.28334700 | -3.27574900 |
| H  | -1.24186500 | -3.40123200 | -3.17213800 |
| H  | -0.23401700 | 0.77198700  | -3.27646000 |
| H  | -1.69030600 | -1.10953200 | -4.02194600 |
| C  | 3.65410600  | -0.43150000 | -0.62460000 |
| C  | 3.04912700  | 0.73730300  | -1.15736200 |
| C  | 5.05499700  | -0.45472100 | -0.53219300 |
| C  | 3.83285600  | 1.83169200  | -1.54838500 |
| C  | 5.83472700  | 0.63350000  | -0.93022700 |
| C  | 5.22057200  | 1.78181000  | -1.43272600 |
| H  | 3.34694500  | 2.71693300  | -1.94754500 |
| H  | 6.91715800  | 0.58390700  | -0.84649500 |
| H  | 5.82036800  | 2.63325400  | -1.74324900 |
| H  | 5.55814800  | -1.33357800 | -0.14392500 |
| Pd | -1.01335800 | 0.79598600  | -0.76687300 |
| O  | -2.67441000 | -0.68899400 | -0.72320600 |
| S  | -3.26956100 | -1.24379800 | 0.55173800  |
| O  | -3.46772500 | -0.19549000 | 1.58451900  |
| O  | -2.69641800 | -2.51802600 | 0.99919400  |
| C  | -4.98884500 | -1.63978400 | -0.03644900 |
| F  | -5.60233200 | -0.51429200 | -0.44620300 |

|    |             |             |             |
|----|-------------|-------------|-------------|
| F  | -5.70546700 | -2.17750000 | 0.95576400  |
| F  | -4.94723300 | -2.49968200 | -1.06060400 |
| Si | 2.47980900  | -1.79816400 | -0.03200600 |
| C  | 1.57280800  | 0.78242600  | -1.27357100 |
| C  | 0.73801300  | 1.75097500  | -0.84407400 |
| C  | 1.04997300  | 3.04822600  | -0.24686100 |
| C  | 1.80090500  | 3.12523800  | 0.94050900  |
| C  | 0.57281100  | 4.23555300  | -0.82921700 |
| C  | 2.05613000  | 4.36079400  | 1.53208300  |
| H  | 2.16283900  | 2.20847300  | 1.39566600  |
| C  | 0.83745100  | 5.47095200  | -0.23842600 |
| H  | -0.00743200 | 4.17604500  | -1.74624500 |
| C  | 1.57444900  | 5.53622100  | 0.94750300  |
| H  | 2.63015100  | 4.40712700  | 2.45366500  |
| H  | 0.46515900  | 6.38169800  | -0.69983400 |
| H  | 1.77286300  | 6.49763000  | 1.41317800  |
| N  | -2.20969600 | 2.13424600  | 0.44146700  |
| H  | -2.84845800 | 1.41463500  | 0.80918300  |
| C  | -2.99466200 | 3.08839000  | -0.38359100 |
| C  | -3.76578700 | 2.40757800  | -1.51088000 |
| H  | -3.69637200 | 3.61783300  | 0.27853400  |
| H  | -2.29431600 | 3.83292700  | -0.77616000 |
| H  | -4.41269300 | 3.13970100  | -2.00685300 |
| H  | -4.38872200 | 1.59217300  | -1.13166700 |
| H  | -3.08602200 | 1.98518300  | -2.25843700 |
| C  | -1.61352900 | 2.80409300  | 1.62761900  |
| C  | -0.92319800 | 1.81318800  | 2.55002700  |
| H  | -0.92202600 | 3.57031600  | 1.27414800  |
| H  | -2.42522700 | 3.31742300  | 2.16492500  |
| H  | -0.50663200 | 2.33728700  | 3.41643000  |
| H  | -0.10374400 | 1.29820200  | 2.04184000  |
| H  | -1.62466000 | 1.05260600  | 2.90037100  |
| C  | 3.30169100  | -3.51915500 | 0.19966700  |
| C  | 4.34390200  | -3.45136400 | 1.34085600  |
| C  | 2.24094700  | -4.55997800 | 0.62854000  |
| C  | 3.97733700  | -3.97674300 | -1.10874800 |
| H  | 5.17948400  | -2.77980000 | 1.12204900  |
| H  | 3.88849500  | -3.12067500 | 2.28128200  |
| H  | 4.77019600  | -4.45033100 | 1.51127100  |
| H  | 1.50513800  | -4.76528400 | -0.15430400 |
| H  | 2.73464300  | -5.51475400 | 0.85964100  |
| H  | 1.69571700  | -4.24285000 | 1.52435400  |
| H  | 4.44292800  | -4.96375700 | -0.97409400 |
| H  | 3.25356500  | -4.06212300 | -1.92855900 |

|   |             |             |             |
|---|-------------|-------------|-------------|
| H | 4.76096300  | -3.28147100 | -1.43142500 |
| C | 1.67046000  | -1.29218600 | 1.59119000  |
| C | 0.35278200  | -1.70411700 | 1.86640600  |
| C | 2.37230000  | -0.59745700 | 2.59280700  |
| C | -0.23489900 | -1.46086100 | 3.10884700  |
| H | -0.23890100 | -2.21308700 | 1.11101300  |
| C | 1.78594800  | -0.34667000 | 3.83630300  |
| H | 3.38686900  | -0.25229900 | 2.40096700  |
| C | 0.48616900  | -0.78914100 | 4.09873700  |
| H | -1.25902400 | -1.77909200 | 3.27844600  |
| H | 2.34290200  | 0.19088200  | 4.60006500  |
| H | 0.03120500  | -0.59398900 | 5.06652800  |

**TS4**

|    |             |             |             |
|----|-------------|-------------|-------------|
| C  | 1.22072200  | 0.50217700  | -1.48499000 |
| C  | 1.60511400  | 0.50963700  | -2.84423400 |
| C  | -0.15239100 | 0.71501900  | -1.23250000 |
| C  | 0.70260400  | 0.79397000  | -3.86909100 |
| H  | 2.63762700  | 0.29721100  | -3.10830900 |
| C  | -1.06706100 | 1.02160800  | -2.24883900 |
| C  | -0.63547500 | 1.06554500  | -3.57182000 |
| H  | 1.04556800  | 0.80415600  | -4.90012200 |
| H  | -2.11159700 | 1.18006700  | -2.01058200 |
| H  | -1.34623700 | 1.27940500  | -4.36518900 |
| C  | 2.35907500  | -0.09027400 | 1.56822500  |
| C  | 1.20141300  | 0.35883500  | 2.25539800  |
| C  | 3.36265700  | -0.70210000 | 2.33562400  |
| C  | 1.08869900  | 0.24117800  | 3.64749300  |
| C  | 3.24553800  | -0.84091600 | 3.72256200  |
| C  | 2.11575100  | -0.35292600 | 4.38062500  |
| H  | 0.19902400  | 0.61671000  | 4.14338700  |
| H  | 4.03959900  | -1.32248700 | 4.28644400  |
| H  | 2.02807500  | -0.44135000 | 5.45984700  |
| C  | 0.13310200  | 0.85998700  | 1.42578800  |
| C  | -0.32862400 | 1.70336800  | 0.57358600  |
| H  | 4.25311700  | -1.08157400 | 1.84205500  |
| Pd | -0.93732500 | -0.44571700 | 0.26900200  |
| O  | -4.21169200 | -2.65452500 | -2.17412200 |
| S  | -3.61530500 | -1.99486200 | -1.01519200 |
| O  | -3.84707400 | -2.59828500 | 0.32127200  |
| O  | -2.17498300 | -1.58271900 | -1.22294200 |
| C  | -4.48242400 | -0.34854300 | -0.89819000 |
| F  | -5.78455700 | -0.51313000 | -0.65517100 |
| F  | -3.95523600 | 0.39663400  | 0.10079300  |

|    |             |             |             |
|----|-------------|-------------|-------------|
| F  | -4.34113400 | 0.34662900  | -2.04064400 |
| Si | 2.69376300  | 0.29447500  | -0.27168500 |
| C  | -0.81865900 | 3.05914900  | 0.41025200  |
| C  | -1.51754500 | 3.63667600  | 1.48855000  |
| C  | -0.58649600 | 3.82482200  | -0.74582600 |
| C  | -1.96733100 | 4.95212200  | 1.41162700  |
| H  | -1.70713500 | 3.03578000  | 2.37268200  |
| C  | -1.03447800 | 5.14193000  | -0.81235600 |
| H  | -0.04972500 | 3.38704800  | -1.57893600 |
| C  | -1.72716700 | 5.70833200  | 0.26117700  |
| H  | -2.51017400 | 5.38497000  | 2.24710500  |
| H  | -0.84292300 | 5.72772800  | -1.70685100 |
| H  | -2.08196700 | 6.73332700  | 0.19990200  |
| C  | 3.67525900  | -1.18590300 | -0.92218600 |
| C  | 4.75864100  | -1.09721300 | -1.81421200 |
| C  | 3.25022300  | -2.47481400 | -0.54476100 |
| C  | 5.38887600  | -2.24150900 | -2.30959300 |
| H  | 5.12529700  | -0.12632900 | -2.13297300 |
| C  | 3.87124300  | -3.62202500 | -1.03848200 |
| H  | 2.42362500  | -2.58498500 | 0.15163200  |
| C  | 4.94493300  | -3.50744000 | -1.92454800 |
| H  | 6.22576700  | -2.14286700 | -2.99621800 |
| H  | 3.51694400  | -4.60319900 | -0.73294400 |
| H  | 5.43213100  | -4.39849000 | -2.31152400 |
| C  | 3.71232200  | 1.94517000  | -0.25274900 |
| C  | 5.07229600  | 1.69931400  | 0.43780000  |
| H  | 5.64867900  | 2.63502900  | 0.46729400  |
| H  | 4.94624300  | 1.36197800  | 1.47245800  |
| H  | 5.67931500  | 0.95317700  | -0.08635700 |
| C  | 3.95605300  | 2.51964000  | -1.66460500 |
| H  | 3.01756600  | 2.74411500  | -2.18180400 |
| H  | 4.52494400  | 3.45711100  | -1.58652100 |
| H  | 4.53452700  | 1.84613400  | -2.30629900 |
| C  | 2.93740800  | 3.00795600  | 0.55847800  |
| H  | 1.98251900  | 3.26598900  | 0.09018000  |
| H  | 2.73290200  | 2.67963400  | 1.58338100  |
| H  | 3.53020200  | 3.93185900  | 0.62031200  |
| N  | -1.40787100 | -2.06126800 | 1.74263100  |
| H  | -2.23327700 | -2.45651600 | 1.27327500  |
| C  | -0.34228800 | -3.09030900 | 1.77900300  |
| C  | -0.15228600 | -3.75694200 | 0.41815100  |
| H  | -0.59716400 | -3.85405000 | 2.53077300  |
| H  | 0.58208400  | -2.60310900 | 2.11336700  |
| H  | 0.62851600  | -4.52294900 | 0.48269500  |

|   |             |             |             |
|---|-------------|-------------|-------------|
| H | -1.07948300 | -4.23514700 | 0.08556200  |
| H | 0.13486200  | -3.03370900 | -0.35158300 |
| C | -1.84006300 | -1.66102800 | 3.10002900  |
| C | -2.92408600 | -0.58809400 | 3.06131400  |
| H | -0.95700200 | -1.30875900 | 3.64080000  |
| H | -2.21006200 | -2.55046600 | 3.63378500  |
| H | -3.30513100 | -0.40087800 | 4.07153500  |
| H | -2.53205300 | 0.35140100  | 2.65773600  |
| H | -3.75597800 | -0.90434100 | 2.42550900  |

### INT13

|    |             |             |             |
|----|-------------|-------------|-------------|
| C  | 0.46160100  | -0.12324000 | -1.44778100 |
| C  | -0.40289500 | -0.55022800 | -2.49541700 |
| C  | 0.60662000  | 1.30544000  | -1.27055600 |
| C  | -1.01535000 | 0.35386800  | -3.34692000 |
| H  | -0.59878400 | -1.60935600 | -2.62129200 |
| C  | -0.02387800 | 2.20896500  | -2.14786900 |
| C  | -0.81148100 | 1.73434500  | -3.18503800 |
| H  | -1.67368900 | -0.00500700 | -4.13199400 |
| H  | 0.10002200  | 3.27512000  | -1.98369400 |
| H  | -1.30760000 | 2.43388300  | -3.85144700 |
| C  | 2.11727400  | -1.15869000 | 1.21646600  |
| C  | 1.79648400  | 0.07242900  | 1.85730300  |
| C  | 2.78770200  | -2.13265800 | 1.96755700  |
| C  | 2.14596500  | 0.29833400  | 3.19196500  |
| C  | 3.14037000  | -1.90441500 | 3.30323600  |
| C  | 2.82476800  | -0.68931400 | 3.91127300  |
| H  | 1.90095400  | 1.24560000  | 3.66317900  |
| H  | 3.65666200  | -2.67707600 | 3.86629500  |
| H  | 3.10160100  | -0.50851100 | 4.94637000  |
| C  | 1.04869200  | 0.94755200  | 0.95236000  |
| C  | 1.47092300  | 1.68518300  | -0.10243500 |
| H  | 3.02250400  | -3.09475000 | 1.51950500  |
| Pd | -0.76758700 | 0.29078500  | 0.45435300  |
| O  | -5.16863600 | -0.58940300 | -0.74617600 |
| S  | -4.06460000 | 0.14389600  | -0.13263100 |
| O  | -4.23964000 | 0.60746100  | 1.26961500  |
| O  | -2.70774700 | -0.47708400 | -0.37174300 |
| C  | -3.93775200 | 1.73854000  | -1.08469800 |
| F  | -5.04152600 | 2.47465200  | -0.92464000 |
| F  | -2.88189400 | 2.45922500  | -0.64329700 |
| F  | -3.76323400 | 1.50321900  | -2.39342400 |
| Si | 1.61955100  | -1.46078900 | -0.61581600 |
| C  | 2.66546700  | 2.52892300  | -0.21843800 |

|   |             |             |             |
|---|-------------|-------------|-------------|
| C | 3.36227500  | 2.94870400  | 0.93117700  |
| C | 3.14656200  | 2.94120100  | -1.47621600 |
| C | 4.51520000  | 3.72042400  | 0.82439900  |
| H | 2.98614200  | 2.66950700  | 1.90958500  |
| C | 4.29626600  | 3.72257900  | -1.57961600 |
| H | 2.62780500  | 2.62930900  | -2.37737200 |
| C | 4.98897600  | 4.11232100  | -0.43162500 |
| H | 5.04076900  | 4.02806900  | 1.72448200  |
| H | 4.65332000  | 4.02364400  | -2.56080100 |
| H | 5.88396800  | 4.72279200  | -0.51274200 |
| C | 0.62570600  | -3.06971900 | -0.62660100 |
| C | 0.44780000  | -3.85178900 | -1.78437800 |
| C | -0.02445400 | -3.49588200 | 0.54567400  |
| C | -0.34927500 | -4.99768900 | -1.77530300 |
| H | 0.93416900  | -3.56852500 | -2.71393800 |
| C | -0.82644400 | -4.63820500 | 0.56202700  |
| H | 0.09586000  | -2.92712600 | 1.46243500  |
| C | -0.99290300 | -5.39195100 | -0.60045800 |
| H | -0.46962700 | -5.57998400 | -2.68512500 |
| H | -1.32510700 | -4.93418400 | 1.48116800  |
| H | -1.61959800 | -6.27963200 | -0.59224800 |
| C | 3.23462100  | -1.60807000 | -1.67568600 |
| C | 3.85974400  | -3.00901800 | -1.49062000 |
| H | 4.77852300  | -3.08576700 | -2.08975700 |
| H | 4.14187100  | -3.19286600 | -0.44736900 |
| H | 3.18951600  | -3.81586100 | -1.80245700 |
| C | 2.93528600  | -1.37564200 | -3.17216400 |
| H | 2.52763100  | -0.37495600 | -3.35453800 |
| H | 3.86160500  | -1.46923600 | -3.75677800 |
| H | 2.22110100  | -2.10015900 | -3.58034300 |
| C | 4.26733600  | -0.55595000 | -1.21792400 |
| H | 3.91348700  | 0.46645300  | -1.37124400 |
| H | 4.52170200  | -0.66354800 | -0.15791500 |
| H | 5.19506100  | -0.67009100 | -1.79726500 |
| N | -1.64941600 | 0.46865700  | 2.42761700  |
| H | -2.63987000 | 0.53654700  | 2.14603000  |
| C | -1.49297800 | -0.75913000 | 3.25216400  |
| C | -2.35601000 | -1.90048500 | 2.71838400  |
| H | -1.78665400 | -0.52883200 | 4.28747700  |
| H | -0.43032500 | -1.02381600 | 3.27007100  |
| H | -2.17853300 | -2.80663300 | 3.30800000  |
| H | -3.41825800 | -1.64430200 | 2.78345100  |
| H | -2.13619100 | -2.11636800 | 1.67009800  |
| C | -1.31406000 | 1.70827900  | 3.16748800  |

|   |             |            |            |
|---|-------------|------------|------------|
| C | -1.58445100 | 2.96143800 | 2.34115900 |
| H | -0.26219200 | 1.65055400 | 3.46102600 |
| H | -1.91044600 | 1.73052400 | 4.09221800 |
| H | -1.46667600 | 3.85269100 | 2.96724800 |
| H | -0.88760000 | 3.03417500 | 1.50081500 |
| H | -2.60253600 | 2.94938100 | 1.94017500 |

**INT7**

|    |             |             |             |
|----|-------------|-------------|-------------|
| C  | -2.10565700 | -1.90077400 | -0.47824800 |
| C  | -1.94171200 | -3.05298700 | -1.24653100 |
| C  | -1.02987600 | -1.51933700 | 0.36807300  |
| C  | -0.74546400 | -3.79840600 | -1.23863100 |
| H  | -2.74336100 | -3.38609000 | -1.89806500 |
| C  | 0.17017900  | -2.28374200 | 0.41761400  |
| C  | 0.30336000  | -3.41670600 | -0.42097400 |
| H  | -0.65581500 | -4.67495900 | -1.87386200 |
| H  | 1.22744700  | -3.98630100 | -0.39519500 |
| C  | -3.55879900 | -0.08491300 | 1.30629400  |
| C  | -2.28385100 | 0.13316000  | 1.89292800  |
| C  | -4.69423200 | 0.22632500  | 2.06842800  |
| C  | -2.17689500 | 0.68049600  | 3.17823200  |
| C  | -4.58481000 | 0.75814600  | 3.35574800  |
| C  | -3.32354800 | 0.99694700  | 3.90494500  |
| H  | -1.19177300 | 0.84739200  | 3.60427100  |
| H  | -5.48122700 | 0.98942100  | 3.92499600  |
| H  | -3.23207100 | 1.41766700  | 4.90276600  |
| H  | -5.68557000 | 0.05717300  | 1.65971400  |
| Pd | 1.24465700  | -0.40936600 | -0.36693000 |
| O  | 2.31366900  | 1.31884400  | -1.31086000 |
| S  | 3.34534400  | 0.46935500  | -2.02800700 |
| O  | 3.84337000  | 0.97709800  | -3.29869800 |
| O  | 2.89555500  | -0.96357300 | -1.96793300 |
| C  | 4.78859400  | 0.53368500  | -0.84539800 |
| F  | 5.34554700  | 1.74459600  | -0.85835300 |
| F  | 5.70710300  | -0.38036900 | -1.17211000 |
| F  | 4.36474000  | 0.27596700  | 0.41439600  |
| Si | -3.51482600 | -0.63558700 | -0.50417700 |
| C  | -1.07184800 | -0.24336300 | 1.12790700  |
| C  | 0.03570200  | 0.49591600  | 0.90757400  |
| C  | 0.34330000  | 1.89219300  | 1.18756400  |
| C  | 1.61383700  | 2.27743900  | 1.65782900  |
| C  | -0.62186100 | 2.88597200  | 0.93019400  |
| C  | 1.89828700  | 3.61832800  | 1.89897700  |
| H  | 2.37538300  | 1.52010900  | 1.81007400  |



|   |             |             |             |
|---|-------------|-------------|-------------|
| C | -0.32937700 | 4.22515000  | 1.16838600  |
| H | -1.58722500 | 2.59576000  | 0.53262600  |
| C | 0.92725700  | 4.59484200  | 1.65802000  |
| H | 2.88064000  | 3.90448400  | 2.26419700  |
| H | -1.08016300 | 4.98297300  | 0.96176100  |
| H | 1.15365300  | 5.64202700  | 1.84005100  |
| C | -2.84962600 | 0.85487800  | -1.46231100 |
| C | -1.65984900 | 0.78223900  | -2.20959500 |
| C | -3.46886900 | 2.11385600  | -1.33929200 |
| C | -1.09245400 | 1.91952600  | -2.78779800 |
| H | -1.14662400 | -0.16997800 | -2.31829200 |
| C | -2.92222900 | 3.25069700  | -1.93870500 |
| H | -4.37215400 | 2.21800000  | -0.74191300 |
| C | -1.72597500 | 3.15657900  | -2.65458300 |
| H | -0.14777400 | 1.84100100  | -3.31819100 |
| H | -3.41718000 | 4.21243200  | -1.82823200 |
| H | -1.28300000 | 4.04484200  | -3.09664500 |
| C | -5.16595300 | -1.27421400 | -1.23359000 |
| C | -4.95821600 | -1.67140000 | -2.71363900 |
| H | -5.92003700 | -1.96420600 | -3.15836200 |
| H | -4.55950000 | -0.83798400 | -3.30373000 |
| H | -4.27885500 | -2.52058200 | -2.83536400 |
| C | -6.23836100 | -0.16077800 | -1.21098100 |
| H | -7.17442200 | -0.54121800 | -1.64434400 |
| H | -6.47007800 | 0.19125100  | -0.20097100 |
| H | -5.93058800 | 0.70603500  | -1.80621200 |
| C | -5.66118300 | -2.49265600 | -0.42744700 |
| H | -6.60134600 | -2.87445700 | -0.85075700 |
| H | -4.93440000 | -3.31391500 | -0.44239000 |
| H | -5.84946900 | -2.23836800 | 0.62230900  |
| H | 0.89561200  | -2.13737700 | 1.22471500  |
| N | 2.92005800  | -2.01886600 | 2.20986500  |
| H | 3.51360600  | -1.21386300 | 2.01840300  |
| C | 2.51275300  | -2.01018000 | 3.61458300  |
| C | 1.82077100  | -0.69869000 | 3.98106400  |
| H | 3.36427200  | -2.19139800 | 4.29856300  |
| H | 1.81689500  | -2.84773500 | 3.76231200  |
| H | 1.49673200  | -0.70911300 | 5.02751300  |
| H | 2.49750900  | 0.15492600  | 3.85080100  |
| H | 0.94728700  | -0.53070300 | 3.34341600  |
| C | 3.62087700  | -3.23998600 | 1.80673200  |
| C | 4.18389000  | -3.11988300 | 0.39200800  |
| H | 2.89835100  | -4.06746600 | 1.85593900  |
| H | 4.43547300  | -3.50060100 | 2.50969300  |

|   |            |             |             |
|---|------------|-------------|-------------|
| H | 4.65008000 | -4.06194100 | 0.08306800  |
| H | 3.40459800 | -2.86036000 | -0.33029600 |
| H | 4.94630400 | -2.33625900 | 0.33423700  |

**TS5**

|    |             |             |             |
|----|-------------|-------------|-------------|
| C  | -2.11786000 | -1.80231700 | -0.41999500 |
| C  | -2.01322300 | -2.98985500 | -1.15809200 |
| C  | -0.91772900 | -1.14531300 | -0.05948100 |
| C  | -0.77984500 | -3.48601200 | -1.60402600 |
| H  | -2.91210000 | -3.53431500 | -1.43045700 |
| C  | 0.35276600  | -1.63870400 | -0.49301600 |
| C  | 0.38787000  | -2.78574000 | -1.31807500 |
| H  | -0.74457400 | -4.39766000 | -2.19470400 |
| H  | 1.34328000  | -3.13468100 | -1.70132400 |
| C  | -3.23994900 | 0.08800300  | 1.51008600  |
| C  | -1.89995800 | 0.54831200  | 1.62456800  |
| C  | -4.14410700 | 0.38281200  | 2.54195800  |
| C  | -1.53517300 | 1.31311400  | 2.74792000  |
| C  | -3.76613900 | 1.13201600  | 3.65650900  |
| C  | -2.45740200 | 1.60875300  | 3.74809100  |
| H  | -0.51802700 | 1.67585700  | 2.84013300  |
| H  | -4.48665900 | 1.34568800  | 4.44153600  |
| H  | -2.14845700 | 2.20223100  | 4.60474200  |
| H  | -5.16678300 | 0.02476100  | 2.48152100  |
| Pd | 1.65885000  | -0.04403100 | -0.74570800 |
| O  | 3.44048600  | 1.42316400  | -1.11939300 |
| S  | 4.39022100  | 0.29584500  | -1.42207400 |
| O  | 5.49434700  | 0.56025300  | -2.33365000 |
| O  | 3.58664700  | -0.95985300 | -1.65562800 |
| C  | 5.18594800  | -0.03076500 | 0.23782000  |
| F  | 6.01805700  | 0.95628300  | 0.56443800  |
| F  | 5.85632900  | -1.18923100 | 0.22277600  |
| F  | 4.23786500  | -0.11595200 | 1.21083300  |
| Si | -3.65719900 | -0.75842700 | -0.11584900 |
| C  | -0.86987000 | 0.15630400  | 0.62448900  |
| C  | 0.23616500  | 0.88408000  | 0.28566400  |
| C  | 0.44443400  | 2.31805200  | 0.47545500  |
| C  | 1.65142600  | 2.82533900  | 0.99630300  |
| C  | -0.57186400 | 3.22311200  | 0.10036700  |
| C  | 1.82269900  | 4.19707600  | 1.16797700  |
| H  | 2.45013200  | 2.13754000  | 1.25429200  |
| C  | -0.38826600 | 4.59229800  | 0.26312500  |
| H  | -1.49478500 | 2.83536100  | -0.32046100 |
| C  | 0.80578500  | 5.08327300  | 0.80268400  |

|   |             |             |             |
|---|-------------|-------------|-------------|
| H | 2.75576100  | 4.57591800  | 1.57567000  |
| H | -1.17648000 | 5.27952200  | -0.03280000 |
| H | 0.94659600  | 6.15353100  | 0.92823400  |
| C | -3.59220100 | 0.60923000  | -1.42285100 |
| C | -2.99189700 | 0.40437500  | -2.67763200 |
| C | -4.09700700 | 1.89149100  | -1.13639800 |
| C | -2.90010100 | 1.43781000  | -3.61277300 |
| H | -2.56803800 | -0.56746700 | -2.92048500 |
| C | -4.01035700 | 2.92817900  | -2.06796800 |
| H | -4.54208500 | 2.08956900  | -0.16353600 |
| C | -3.40885400 | 2.70245100  | -3.30880200 |
| H | -2.42259200 | 1.25917700  | -4.57273300 |
| H | -4.40267200 | 3.91223800  | -1.82331100 |
| H | -3.33029200 | 3.50997100  | -4.03197600 |
| C | -5.34099800 | -1.67075700 | -0.19636200 |
| C | -5.52922200 | -2.29336900 | -1.59931200 |
| H | -6.53621200 | -2.72709100 | -1.68129600 |
| H | -5.42554200 | -1.54430400 | -2.39309200 |
| H | -4.81763300 | -3.09915900 | -1.80384100 |
| C | -6.49493100 | -0.66174900 | 0.00816000  |
| H | -7.46081600 | -1.17673000 | -0.09565800 |
| H | -6.48394100 | -0.19376100 | 0.99709000  |
| H | -6.46482200 | 0.13952400  | -0.73917000 |
| C | -5.40784400 | -2.77598500 | 0.87655500  |
| H | -6.37061900 | -3.30470700 | 0.82387600  |
| H | -4.61394300 | -3.52079600 | 0.73994600  |
| H | -5.30831100 | -2.36928300 | 1.88984700  |
| H | 1.24390400  | -1.78681200 | 0.51157100  |
| N | 1.94010700  | -2.29809800 | 1.64180500  |
| H | 2.77005800  | -1.71267300 | 1.73795600  |
| C | 1.03782600  | -2.12554100 | 2.80119900  |
| C | 1.23332700  | -0.75085200 | 3.43269700  |
| H | 1.22175300  | -2.91995600 | 3.53731200  |
| H | 0.00957200  | -2.24356800 | 2.43692000  |
| H | 0.46945200  | -0.56704500 | 4.19330200  |
| H | 2.22002300  | -0.67229700 | 3.90487500  |
| H | 1.14711400  | 0.02972000  | 2.67260100  |
| C | 2.32726500  | -3.68276700 | 1.30887500  |
| C | 3.52197100  | -3.69556900 | 0.35876000  |
| H | 1.45253000  | -4.15877000 | 0.84825600  |
| H | 2.55731800  | -4.23730600 | 2.22977900  |
| H | 3.75616400  | -4.72319500 | 0.06353600  |
| H | 3.33238300  | -3.10542700 | -0.54152100 |
| H | 4.41053200  | -3.27012300 | 0.83845200  |

**INT8**

|    |             |             |             |
|----|-------------|-------------|-------------|
| C  | -2.04889700 | -1.25134700 | -0.57540000 |
| C  | -2.07827900 | -2.50027200 | -1.23662000 |
| C  | -0.83752300 | -0.52850700 | -0.57403100 |
| C  | -0.95777400 | -3.02178600 | -1.87431000 |
| H  | -3.00533700 | -3.06469100 | -1.27715600 |
| C  | 0.30636200  | -1.07440400 | -1.21475400 |
| C  | 0.24653900  | -2.29790000 | -1.86901900 |
| H  | -1.01409800 | -3.98157700 | -2.38236800 |
| H  | 1.12756400  | -2.69581500 | -2.36708300 |
| C  | -2.95565900 | 1.16408100  | 0.87579300  |
| C  | -1.59541700 | 1.57411600  | 0.77910400  |
| C  | -3.85385600 | 1.96989700  | 1.60488200  |
| C  | -1.19009600 | 2.69416500  | 1.54262200  |
| C  | -3.44718400 | 3.11127400  | 2.28904400  |
| C  | -2.09244500 | 3.45029900  | 2.27967000  |
| H  | -0.14880700 | 2.98623200  | 1.55173700  |
| H  | -4.16782000 | 3.71182600  | 2.83751000  |
| H  | -1.73544800 | 4.30939000  | 2.84197900  |
| H  | -4.90453200 | 1.69507100  | 1.63600500  |
| Pd | 1.96473700  | -0.00349200 | -1.10979400 |
| O  | 4.25531000  | 0.77068300  | -1.01394200 |
| S  | 4.79251000  | -0.62532300 | -1.08737400 |
| O  | 6.06059500  | -0.84518200 | -1.77012900 |
| O  | 3.66569400  | -1.57236300 | -1.41665000 |
| C  | 5.14208400  | -1.02003100 | 0.71084700  |
| F  | 6.30421700  | -0.50820100 | 1.10171200  |
| F  | 5.14438900  | -2.34376400 | 0.92822800  |
| F  | 4.16637500  | -0.48855400 | 1.51031200  |
| Si | -3.55806100 | -0.49635700 | 0.23319200  |
| C  | -0.59892400 | 0.83670800  | -0.04345500 |
| C  | 0.64052100  | 1.31227200  | -0.40517900 |
| C  | 1.13127200  | 2.69475300  | -0.42599300 |
| C  | 2.38107500  | 3.05125300  | 0.11861800  |
| C  | 0.37416900  | 3.69403000  | -1.07523200 |
| C  | 2.83860600  | 4.36692700  | 0.04803700  |
| H  | 3.00244800  | 2.28998400  | 0.57899800  |
| C  | 0.83911100  | 5.00255400  | -1.15092700 |
| H  | -0.58342100 | 3.42284800  | -1.50929100 |
| C  | 2.07130500  | 5.34724100  | -0.58361900 |
| H  | 3.80437100  | 4.62133400  | 0.47621500  |
| H  | 0.24201000  | 5.75745100  | -1.65587700 |
| H  | 2.43417400  | 6.36958400  | -0.64586100 |

|             |             |             |             |
|-------------|-------------|-------------|-------------|
| C           | -4.98260600 | -0.27304600 | -0.99041700 |
| C           | -5.57765900 | -1.36890500 | -1.64699800 |
| C           | -5.47095600 | 1.00956200  | -1.30315300 |
| C           | -6.61899300 | -1.19528400 | -2.55927000 |
| H           | -5.22177100 | -2.37775600 | -1.45903100 |
| C           | -6.51440700 | 1.19001800  | -2.21406000 |
| H           | -5.02583300 | 1.88378100  | -0.83693600 |
| C           | -7.09418400 | 0.08723600  | -2.84236500 |
| H           | -7.05688500 | -2.06005700 | -3.05145300 |
| H           | -6.87020300 | 2.19312300  | -2.43559600 |
| H           | -7.90549800 | 0.22514000  | -3.55243200 |
| C           | -4.10340700 | -1.58992700 | 1.74351000  |
| C           | -4.45594700 | -3.02717000 | 1.30513100  |
| H           | -4.71867300 | -3.63109300 | 2.18631900  |
| H           | -5.32034500 | -3.04996400 | 0.63287800  |
| H           | -3.61682000 | -3.52655300 | 0.80918300  |
| C           | -5.33372500 | -0.99187900 | 2.45690200  |
| H           | -5.67736800 | -1.67312500 | 3.24917000  |
| H           | -5.10510200 | -0.03385300 | 2.93377300  |
| H           | -6.17157900 | -0.84001500 | 1.76567700  |
| C           | -2.92760400 | -1.66158200 | 2.73989100  |
| H           | -3.20801900 | -2.25423200 | 3.62313100  |
| H           | -2.05246400 | -2.14281600 | 2.28514900  |
| H           | -2.62877800 | -0.66537600 | 3.08814500  |
| H           | 1.58439100  | -1.03341600 | 0.81015500  |
| N           | 1.52062100  | -1.54847800 | 1.73438300  |
| H           | 2.48903400  | -1.58741700 | 2.06567000  |
| C           | 0.69155800  | -0.73116400 | 2.68395500  |
| C           | 1.38106500  | 0.58434000  | 3.01363000  |
| H           | 0.52730500  | -1.34350300 | 3.57585000  |
| H           | -0.26715400 | -0.56758700 | 2.19223000  |
| H           | 0.73487300  | 1.17140200  | 3.67206300  |
| H           | 2.34002500  | 0.42436800  | 3.51932400  |
| H           | 1.55258200  | 1.16612700  | 2.10554800  |
| C           | 1.02027200  | -2.94087000 | 1.46334800  |
| C           | 2.07254400  | -3.73974200 | 0.70578700  |
| H           | 0.09895600  | -2.82994500 | 0.88841800  |
| H           | 0.78387800  | -3.38995500 | 2.43299000  |
| H           | 1.66456200  | -4.72331800 | 0.45541500  |
| H           | 2.36218600  | -3.23744900 | -0.21994100 |
| H           | 2.97478700  | -3.88590500 | 1.31032300  |
| <b>INT9</b> |             |             |             |
| C           | 2.11056600  | -1.20339800 | -0.70951100 |

|    |             |             |             |
|----|-------------|-------------|-------------|
| C  | 2.28043100  | -2.54852100 | -1.09596500 |
| C  | 0.81018300  | -0.66842700 | -0.67288000 |
| C  | 1.19704400  | -3.33329300 | -1.47352300 |
| H  | 3.27954700  | -2.97881100 | -1.10073100 |
| C  | -0.28728400 | -1.45367700 | -1.11915500 |
| C  | -0.09108700 | -2.77071500 | -1.51305600 |
| H  | 1.34151900  | -4.37361900 | -1.75511800 |
| H  | -0.92490100 | -3.38013000 | -1.84701600 |
| C  | 2.77203300  | 1.43523400  | 0.40987300  |
| C  | 1.36630200  | 1.63859900  | 0.41743600  |
| C  | 3.59830300  | 2.32274700  | 1.12083100  |
| C  | 0.85324200  | 2.71214900  | 1.17641400  |
| C  | 3.07698200  | 3.40081800  | 1.83124000  |
| C  | 1.69218600  | 3.58545700  | 1.85952200  |
| H  | -0.21711100 | 2.85471000  | 1.24884900  |
| H  | 3.73575600  | 4.07485300  | 2.37246500  |
| H  | 1.26040800  | 4.40294600  | 2.43153900  |
| H  | 4.67319900  | 2.15252200  | 1.12978500  |
| Si | 3.53402900  | -0.00971700 | -0.50693000 |
| C  | 0.43985100  | 0.71168100  | -0.28398300 |
| C  | -0.86154800 | 0.97804000  | -0.58927200 |
| C  | -1.59180300 | 2.24090900  | -0.68918800 |
| C  | -1.10191400 | 3.27517800  | -1.51804800 |
| C  | -1.83304300 | 4.44310300  | -1.70472800 |
| H  | -0.13901800 | 3.14092300  | -2.00191100 |
| C  | -3.57659000 | 3.59304100  | -0.26148600 |
| C  | -3.07570300 | 4.60704500  | -1.07935600 |
| H  | -1.43739100 | 5.23019700  | -2.34139800 |
| H  | -4.53684800 | 3.71510100  | 0.23293700  |
| H  | -3.64535200 | 5.52007500  | -1.22962400 |
| Pd | -2.04687600 | -0.47490600 | -1.26430300 |
| H  | -1.48414400 | -1.30689800 | 0.73410300  |
| C  | 4.91160500  | -0.80970800 | 0.50674700  |
| C  | 4.56356000  | -1.79004300 | 1.45700200  |
| C  | 6.27127600  | -0.46282000 | 0.40243400  |
| C  | 5.52689600  | -2.39434500 | 2.26628000  |
| H  | 3.52351300  | -2.08942500 | 1.56118200  |
| C  | 7.24048400  | -1.06338900 | 1.20906300  |
| H  | 6.58885000  | 0.28439500  | -0.31818900 |
| C  | 6.86997200  | -2.03171200 | 2.14388500  |
| H  | 5.22951300  | -3.14863600 | 2.99049600  |
| H  | 8.28402600  | -0.77633700 | 1.10571600  |
| H  | 7.62285700  | -2.50150800 | 2.77169900  |
| C  | 4.09688900  | 0.56400600  | -2.26034300 |

|   |             |             |             |
|---|-------------|-------------|-------------|
| C | 4.83845300  | -0.57891800 | -2.98142900 |
| C | 2.82816500  | 0.93189500  | -3.06377700 |
| C | 4.99616900  | 1.81628600  | -2.19072300 |
| H | 5.75684200  | -0.86737600 | -2.45686600 |
| H | 4.20796300  | -1.47247000 | -3.06910300 |
| H | 5.11790500  | -0.27197000 | -4.00016400 |
| H | 2.24973100  | 1.72195300  | -2.56840100 |
| H | 3.10952800  | 1.30175800  | -4.06060000 |
| H | 2.16495900  | 0.07105300  | -3.19999200 |
| H | 5.23412200  | 2.16445900  | -3.20669500 |
| H | 4.50159600  | 2.64061400  | -1.66426500 |
| H | 5.95077800  | 1.62502100  | -1.68822100 |
| S | -2.91712900 | -1.14725200 | 2.36052100  |
| C | -2.20963700 | 0.28334900  | 3.32994800  |
| F | -1.54576400 | 1.09333400  | 2.50148600  |
| F | -1.38650900 | -0.16951000 | 4.26927300  |
| F | -3.21708200 | 0.95311000  | 3.89244000  |
| O | -3.82489100 | -0.56347000 | 1.37021000  |
| O | -1.58299300 | -1.68399000 | 1.66800300  |
| O | -3.37318100 | -2.14078200 | 3.31415600  |
| C | -2.84700500 | 2.41867700  | -0.06686900 |
| H | -3.23373900 | 1.64131000  | 0.58351700  |
| N | -3.76802600 | -1.76705500 | -2.09267000 |
| H | -3.67729400 | -1.62342400 | -3.10014300 |
| C | -3.74519400 | -3.23865300 | -1.87230400 |
| C | -3.59247600 | -3.63305300 | -0.40707300 |
| H | -2.90646600 | -3.63322100 | -2.45418800 |
| H | -4.66428600 | -3.68244800 | -2.28722400 |
| H | -3.64472500 | -4.72315400 | -0.31351500 |
| H | -2.62995700 | -3.30400000 | -0.00967700 |
| H | -4.38300800 | -3.20575000 | 0.21662800  |
| C | -5.06133800 | -1.15129000 | -1.68442100 |
| C | -5.18307800 | 0.28532600  | -2.18589400 |
| H | -5.11160300 | -1.17267800 | -0.59417400 |
| H | -5.89558900 | -1.75488000 | -2.07563200 |
| H | -6.15802000 | 0.69644200  | -1.90419400 |
| H | -4.41865700 | 0.94089600  | -1.75166300 |
| H | -5.09897200 | 0.33871900  | -3.27878600 |

**TS6**

|   |            |             |             |
|---|------------|-------------|-------------|
| C | 2.33969700 | -1.33142500 | 0.00739600  |
| C | 2.58874300 | -2.70740300 | 0.12811400  |
| C | 1.01142000 | -0.89808100 | -0.21407400 |
| C | 1.56104400 | -3.63740400 | -0.01887600 |

|    |             |             |             |
|----|-------------|-------------|-------------|
| H  | 3.60030700  | -3.05449100 | 0.32530200  |
| C  | -0.02582700 | -1.85130000 | -0.42761200 |
| C  | 0.26498800  | -3.20924600 | -0.34006400 |
| H  | 1.76542500  | -4.69981000 | 0.09339800  |
| H  | -0.50900400 | -3.95089400 | -0.50530600 |
| C  | 2.86091500  | 1.55729900  | -0.00852300 |
| C  | 1.44704300  | 1.66414000  | -0.09859900 |
| C  | 3.61440900  | 2.70380700  | 0.28804300  |
| C  | 0.84908900  | 2.91592900  | 0.16968000  |
| C  | 3.01028700  | 3.94012000  | 0.50728200  |
| C  | 1.61710600  | 4.03683300  | 0.45890600  |
| H  | -0.22961600 | 3.00599800  | 0.17601100  |
| H  | 3.61495900  | 4.81291300  | 0.73903000  |
| H  | 1.12546300  | 4.98408900  | 0.66256000  |
| H  | 4.69584700  | 2.62060500  | 0.37294600  |
| Si | 3.72035700  | -0.09329200 | -0.22485600 |
| C  | 0.58074700  | 0.49308700  | -0.36451900 |
| C  | -0.78178500 | 0.59415200  | -0.67628300 |
| C  | -1.39720100 | 1.65476000  | -1.49732800 |
| C  | -0.74080700 | 2.10277200  | -2.66524700 |
| C  | -1.33541500 | 3.03561600  | -3.50757100 |
| H  | 0.24068800  | 1.70084200  | -2.89993700 |
| C  | -3.27150400 | 3.10595600  | -2.06593800 |
| C  | -2.60619200 | 3.54349500  | -3.21221500 |
| H  | -0.81075700 | 3.36610300  | -4.40041400 |
| H  | -4.25729400 | 3.49515400  | -1.82489500 |
| H  | -3.07096000 | 4.27091300  | -3.87224900 |
| Pd | -1.82751500 | -1.13963000 | -0.89538200 |
| H  | -1.31237100 | 0.54581800  | 0.62994800  |
| C  | 5.04772500  | -0.34525900 | 1.08932800  |
| C  | 4.66797200  | -0.88386800 | 2.33460600  |
| C  | 6.39918800  | 0.00751700  | 0.91807000  |
| C  | 5.59499700  | -1.05988400 | 3.36302000  |
| H  | 3.63366100  | -1.17479000 | 2.50069600  |
| C  | 7.33140400  | -0.16685400 | 1.94307000  |
| H  | 6.73950200  | 0.42166600  | -0.02603900 |
| C  | 6.93063600  | -0.70126800 | 3.16901800  |
| H  | 5.27493400  | -1.47783300 | 4.31401200  |
| H  | 8.36975000  | 0.11262800  | 1.78329800  |
| H  | 7.65500600  | -0.83869800 | 3.96768300  |
| C  | 4.36788200  | -0.24487900 | -2.03560700 |
| C  | 5.19473500  | -1.53583400 | -2.19841800 |
| C  | 3.14182700  | -0.30501500 | -2.97506000 |
| C  | 5.21832600  | 0.97876700  | -2.43833800 |



|   |             |             |             |
|---|-------------|-------------|-------------|
| H | 6.08314000  | -1.53781200 | -1.55636400 |
| H | 4.60192700  | -2.42575900 | -1.95445100 |
| H | 5.53415900  | -1.64216000 | -3.23909800 |
| H | 2.51097900  | 0.58752700  | -2.87492300 |
| H | 3.47411900  | -0.35711300 | -4.02182000 |
| H | 2.51452000  | -1.18090200 | -2.77840800 |
| H | 5.51323800  | 0.89752300  | -3.49466400 |
| H | 4.66235100  | 1.91582400  | -2.32049100 |
| H | 6.14221500  | 1.06294500  | -1.85558700 |
| S | -3.15225300 | 0.12094900  | 2.06219400  |
| C | -4.00374100 | 1.61580100  | 2.77840500  |
| F | -3.99355800 | 2.61722900  | 1.88627300  |
| F | -3.38624000 | 2.01634500  | 3.89032400  |
| F | -5.27186200 | 1.30347300  | 3.06338700  |
| O | -3.89149800 | -0.15431500 | 0.80972600  |
| O | -1.75667200 | 0.71853300  | 1.77882600  |
| O | -3.14842300 | -0.89574800 | 3.10899600  |
| C | -2.67849100 | 2.17063900  | -1.21659400 |
| H | -3.20670400 | 1.84299600  | -0.33115900 |
| N | -3.25686900 | -2.85564700 | -1.31655800 |
| H | -2.96602800 | -3.21883600 | -2.22513800 |
| C | -3.28686900 | -4.00300600 | -0.36498300 |
| C | -3.25754400 | -3.56919300 | 1.09643600  |
| H | -2.41701100 | -4.62891700 | -0.58696500 |
| H | -4.17923000 | -4.61570000 | -0.56782100 |
| H | -3.35022700 | -4.44766500 | 1.74472300  |
| H | -2.31955600 | -3.06049500 | 1.33432600  |
| H | -4.06954700 | -2.88019400 | 1.33888500  |
| C | -4.60536000 | -2.24862800 | -1.50092000 |
| C | -4.58173800 | -1.10876800 | -2.51616300 |
| H | -4.93026200 | -1.87087400 | -0.53019600 |
| H | -5.31485100 | -3.02727100 | -1.82160800 |
| H | -5.59960900 | -0.74192700 | -2.68573700 |
| H | -3.98901500 | -0.25536000 | -2.16288600 |
| H | -4.17389500 | -1.43403200 | -3.48117500 |

#### INT10

|   |            |            |             |
|---|------------|------------|-------------|
| C | 2.40282100 | 0.72476400 | -0.74400100 |
| C | 2.63850100 | 1.10923700 | -2.07280200 |
| C | 1.07450900 | 0.69859600 | -0.24758700 |
| C | 1.58763000 | 1.48860800 | -2.90474200 |
| H | 3.65560100 | 1.10894200 | -2.45813300 |
| C | 0.00783500 | 0.96863500 | -1.13308400 |
| C | 0.27345100 | 1.40533200 | -2.43307800 |

|    |             |             |             |
|----|-------------|-------------|-------------|
| H  | 1.77958500  | 1.81610700  | -3.92373200 |
| H  | -0.54730600 | 1.66034700  | -3.09916000 |
| C  | 2.94183000  | -0.89091700 | 1.64517600  |
| C  | 1.57603900  | -0.63971000 | 1.91271300  |
| C  | 3.58912500  | -1.92015400 | 2.34737600  |
| C  | 0.89316900  | -1.43859900 | 2.84630500  |
| C  | 2.91122200  | -2.69498500 | 3.28920600  |
| C  | 1.55696700  | -2.45439700 | 3.53201900  |
| H  | -0.17113400 | -1.28635100 | 3.00361800  |
| H  | 3.42966900  | -3.49074500 | 3.81749700  |
| H  | 1.01033900  | -3.06864200 | 4.24250500  |
| H  | 4.63641300  | -2.12940000 | 2.14071900  |
| Si | 3.81633300  | 0.17268500  | 0.36998400  |
| C  | 0.83970600  | 0.45066600  | 1.21077700  |
| C  | -0.01868800 | 1.23128700  | 1.90227600  |
| C  | -0.84061700 | 2.29090400  | 1.27031500  |
| C  | -0.28253500 | 3.48389000  | 0.78767900  |
| C  | -1.07344800 | 4.41271900  | 0.11403200  |
| H  | 0.77946900  | 3.66273400  | 0.92059300  |
| C  | -3.01043400 | 2.99429400  | 0.36940600  |
| C  | -2.43086600 | 4.16306000  | -0.12060700 |
| H  | -0.62217200 | 5.32960400  | -0.25591100 |
| H  | -4.06420100 | 2.78128800  | 0.22112500  |
| H  | -3.03155300 | 4.88052800  | -0.67189300 |
| Pd | -1.90011300 | 0.57894000  | -0.69068200 |
| H  | -0.16824100 | 1.05497400  | 2.96547300  |
| C  | 4.98398000  | -0.92062300 | -0.63429800 |
| C  | 4.54721400  | -2.22084000 | -0.95987900 |
| C  | 6.23739800  | -0.51654900 | -1.12737600 |
| C  | 5.32473400  | -3.07677400 | -1.74005000 |
| H  | 3.58674000  | -2.57204200 | -0.58957300 |
| C  | 7.02189800  | -1.36875800 | -1.90875800 |
| H  | 6.61888500  | 0.47422300  | -0.90220300 |
| C  | 6.56705000  | -2.65145400 | -2.21718100 |
| H  | 4.96387200  | -4.07532700 | -1.97339900 |
| H  | 7.98814300  | -1.03026300 | -2.27420300 |
| H  | 7.17650600  | -3.31629100 | -2.82381100 |
| C  | 4.66832800  | 1.67399400  | 1.21390700  |
| C  | 5.10989100  | 2.72646700  | 0.17510100  |
| C  | 3.64584600  | 2.33631600  | 2.16389200  |
| C  | 5.87812200  | 1.19672700  | 2.04391400  |
| H  | 5.87101600  | 2.34888400  | -0.51627800 |
| H  | 4.26227700  | 3.07681800  | -0.42583600 |
| H  | 5.54129400  | 3.60037400  | 0.68458800  |

|   |             |             |             |
|---|-------------|-------------|-------------|
| H | 3.30381200  | 1.64764300  | 2.94394200  |
| H | 4.10231800  | 3.20539100  | 2.65922500  |
| H | 2.76081800  | 2.68912800  | 1.62276500  |
| H | 6.33656700  | 2.04633700  | 2.57056400  |
| H | 5.57761200  | 0.46364800  | 2.80292700  |
| H | 6.65370800  | 0.73435100  | 1.42363400  |
| S | -4.21198000 | -1.14217800 | 0.53894500  |
| C | -6.04908700 | -1.14771800 | 0.82477100  |
| F | -6.41404800 | -0.03041000 | 1.46694700  |
| F | -6.38962900 | -2.20686400 | 1.56588700  |
| F | -6.69768500 | -1.20645600 | -0.34477600 |
| O | -4.06099300 | 0.10443700  | -0.31430500 |
| O | -3.59305800 | -1.02288000 | 1.86902200  |
| O | -3.93039100 | -2.37595100 | -0.23160400 |
| C | -2.22911500 | 2.06273300  | 1.09095500  |
| H | -2.70959300 | 1.24026800  | 1.61716300  |
| N | -1.82325200 | -1.16874100 | -1.97266900 |
| H | -2.64791800 | -1.64947400 | -1.58972100 |
| C | -2.07439700 | -0.89383900 | -3.40913300 |
| C | -3.27520100 | 0.02144600  | -3.62585600 |
| H | -2.23405400 | -1.85482100 | -3.92016900 |
| H | -1.16238700 | -0.45382500 | -3.82317400 |
| H | -3.49914500 | 0.09459500  | -4.69559500 |
| H | -4.15972500 | -0.35946300 | -3.10578400 |
| H | -3.07818900 | 1.02942600  | -3.24348500 |
| C | -0.65695900 | -2.07348600 | -1.77216700 |
| C | -0.57785800 | -2.58581000 | -0.33962100 |
| H | 0.24343600  | -1.51664000 | -2.04470400 |
| H | -0.75460300 | -2.91790700 | -2.47051600 |
| H | 0.30706000  | -3.21939100 | -0.21887900 |
| H | -0.49512200 | -1.75766300 | 0.36796200  |
| H | -1.46940500 | -3.16179100 | -0.07601200 |

**TS7**

|   |             |             |             |
|---|-------------|-------------|-------------|
| C | 2.34307100  | 0.05408500  | -1.08996500 |
| C | 2.58151900  | -0.49860100 | -2.35672300 |
| C | 1.00982900  | 0.17113100  | -0.61757100 |
| C | 1.52530800  | -0.92000800 | -3.16267000 |
| H | 3.60417600  | -0.60169100 | -2.71291700 |
| C | -0.04227800 | -0.35418000 | -1.39109300 |
| C | 0.21809000  | -0.85356100 | -2.67355500 |
| H | 1.71455000  | -1.31661900 | -4.15755200 |
| H | -0.60020700 | -1.21102900 | -3.29335300 |
| C | 3.00923100  | 0.46236700  | 1.72876100  |

|    |             |             |             |
|----|-------------|-------------|-------------|
| C  | 1.61000700  | 0.62843400  | 1.85680300  |
| C  | 3.77302800  | 0.23270200  | 2.88376400  |
| C  | 1.02089200  | 0.55508200  | 3.13124300  |
| C  | 3.18104700  | 0.16741900  | 4.14586900  |
| C  | 1.79892500  | 0.32943900  | 4.26574100  |
| H  | -0.05738200 | 0.65143600  | 3.22464300  |
| H  | 3.79002500  | -0.01610100 | 5.02721200  |
| H  | 1.32287400  | 0.26721900  | 5.24088900  |
| H  | 4.84769200  | 0.09116200  | 2.79155500  |
| Si | 3.76275400  | 0.59267700  | 0.01437000  |
| C  | 0.74642600  | 0.89313300  | 0.66894300  |
| C  | -0.17858600 | 1.87839300  | 0.75093200  |
| C  | -1.10761400 | 2.30158700  | -0.31503700 |
| C  | -1.04997800 | 3.62496200  | -0.77890000 |
| C  | -1.90308300 | 4.05714300  | -1.79279100 |
| H  | -0.31438600 | 4.30704100  | -0.35902800 |
| C  | -2.94650600 | 1.88383200  | -1.84814500 |
| C  | -2.85481300 | 3.18489500  | -2.33438400 |
| H  | -1.83303300 | 5.07908100  | -2.15697500 |
| H  | -3.71857800 | 1.22432800  | -2.23573700 |
| H  | -3.52642200 | 3.52820900  | -3.11707900 |
| Pd | -1.83634000 | -0.67405100 | -0.62224700 |
| H  | -0.19979900 | 2.47886000  | 1.65962100  |
| C  | 5.16618100  | -0.66603500 | -0.11776100 |
| C  | 4.93153500  | -1.95148900 | 0.41166500  |
| C  | 6.41065200  | -0.43690700 | -0.73006700 |
| C  | 5.89155300  | -2.96000300 | 0.33208600  |
| H  | 3.98360200  | -2.16340200 | 0.90161700  |
| C  | 7.37812100  | -1.44199800 | -0.81293100 |
| H  | 6.64098300  | 0.53691300  | -1.14966900 |
| C  | 7.12062100  | -2.70652200 | -0.28244900 |
| H  | 5.68357100  | -3.94157500 | 0.75071100  |
| H  | 8.33239500  | -1.23520900 | -1.29089900 |
| H  | 7.87227200  | -3.48924400 | -0.34530400 |
| C  | 4.27696000  | 2.40409800  | -0.36800100 |
| C  | 4.66277600  | 2.56754900  | -1.85359600 |
| C  | 3.06496800  | 3.32082000  | -0.08530600 |
| C  | 5.44559100  | 2.83123500  | 0.54374900  |
| H  | 5.54485400  | 1.98081000  | -2.13194800 |
| H  | 3.84184000  | 2.26610600  | -2.51485400 |
| H  | 4.89344300  | 3.62119600  | -2.06853700 |
| H  | 2.74275600  | 3.26119000  | 0.96004500  |
| H  | 3.33369700  | 4.36676800  | -0.29407200 |
| H  | 2.20498600  | 3.06550000  | -0.71465700 |

|   |             |             |             |
|---|-------------|-------------|-------------|
| H | 5.70964600  | 3.88237800  | 0.35667100  |
| H | 5.17712900  | 2.74310700  | 1.60386900  |
| H | 6.34693400  | 2.23055000  | 0.37844300  |
| S | -4.44694200 | -0.27508500 | 1.31886600  |
| C | -6.04036800 | 0.27560800  | 0.52815100  |
| F | -5.77139300 | 0.80785500  | -0.67046700 |
| F | -6.64005400 | 1.18658200  | 1.29171800  |
| F | -6.84241300 | -0.77895300 | 0.37198900  |
| O | -3.88268900 | -1.23649100 | 0.32747200  |
| O | -3.62243400 | 1.02941600  | 1.31369300  |
| O | -4.75698200 | -0.75735700 | 2.65476800  |
| C | -2.08910900 | 1.40799900  | -0.82714000 |
| H | -2.90474700 | 1.09463300  | 0.35519200  |
| N | -1.46540300 | -2.84970900 | -0.37743500 |
| H | -2.30146700 | -3.09487800 | 0.15880500  |
| C | -1.47460400 | -3.64194900 | -1.62946900 |
| C | -2.73612300 | -3.39364300 | -2.45010200 |
| H | -1.38229400 | -4.71222400 | -1.38740900 |
| H | -0.58240000 | -3.35683900 | -2.19464800 |
| H | -2.73712000 | -4.02911800 | -3.34212000 |
| H | -3.63806000 | -3.61920000 | -1.86890400 |
| H | -2.79745200 | -2.34677600 | -2.76710400 |
| C | -0.27401100 | -3.14295100 | 0.46073900  |
| C | -0.40027200 | -2.53278800 | 1.85189400  |
| H | 0.59509200  | -2.73142300 | -0.06145400 |
| H | -0.13767900 | -4.23319900 | 0.53379500  |
| H | 0.49341800  | -2.75290300 | 2.44434700  |
| H | -0.50314800 | -1.44637400 | 1.79159300  |
| H | -1.27211000 | -2.93206300 | 2.38484600  |

**INT11**

|   |             |             |             |
|---|-------------|-------------|-------------|
| C | 2.41183000  | -0.09809500 | -1.09363400 |
| C | 2.71165800  | -0.79391100 | -2.27298800 |
| C | 1.06151100  | 0.00943500  | -0.66346400 |
| C | 1.70062400  | -1.37571900 | -3.03561800 |
| H | 3.74742400  | -0.88518600 | -2.59290900 |
| C | 0.05174500  | -0.64621800 | -1.39702000 |
| C | 0.37834100  | -1.30141400 | -2.59336500 |
| H | 1.93740500  | -1.89584200 | -3.96112300 |
| H | -0.40392400 | -1.77390900 | -3.18153000 |
| C | 3.01816900  | 0.65593100  | 1.65701400  |
| C | 1.60858800  | 0.74293600  | 1.75429000  |
| C | 3.77998500  | 0.59317500  | 2.83395400  |
| C | 1.01211100  | 0.75716600  | 3.02840000  |

|    |             |             |             |
|----|-------------|-------------|-------------|
| C  | 3.17850600  | 0.61500700  | 4.09294400  |
| C  | 1.78763000  | 0.69717000  | 4.18543900  |
| H  | -0.07015300 | 0.79535700  | 3.10862600  |
| H  | 3.78665500  | 0.56086200  | 4.99215700  |
| H  | 1.30280900  | 0.70258700  | 5.15844200  |
| H  | 4.86259800  | 0.51411200  | 2.76236000  |
| Si | 3.77966800  | 0.65828400  | -0.05728200 |
| C  | 0.74142200  | 0.84048500  | 0.54074800  |
| C  | -0.24721000 | 1.77022900  | 0.55141600  |
| C  | -1.23363000 | 2.08402600  | -0.49802600 |
| C  | -1.50538100 | 3.44495300  | -0.75714700 |
| C  | -2.43140800 | 3.82121100  | -1.72378900 |
| H  | -0.96475900 | 4.20590700  | -0.19799800 |
| C  | -2.88852700 | 1.48891200  | -2.16965500 |
| C  | -3.12412000 | 2.83778800  | -2.43841900 |
| H  | -2.61756400 | 4.87419900  | -1.91807900 |
| H  | -3.45084200 | 0.73620500  | -2.71702400 |
| H  | -3.85409900 | 3.12312100  | -3.19229000 |
| Pd | -1.78446700 | -0.86852800 | -0.68416900 |
| H  | -0.28142500 | 2.43487700  | 1.41395900  |
| C  | 5.27714900  | -0.49644400 | -0.05105600 |
| C  | 5.15448200  | -1.71622500 | 0.64512700  |
| C  | 6.49088300  | -0.25374500 | -0.71795100 |
| C  | 6.19180300  | -2.64825100 | 0.67386500  |
| H  | 4.23352800  | -1.93626700 | 1.18033800  |
| C  | 7.53507000  | -1.18218600 | -0.69349400 |
| H  | 6.63621700  | 0.67130200  | -1.26618800 |
| C  | 7.38800100  | -2.38245100 | 0.00259400  |
| H  | 6.06894000  | -3.57987500 | 1.22071400  |
| H  | 8.46270600  | -0.96584400 | -1.21755700 |
| H  | 8.19942200  | -3.10552800 | 0.02357300  |
| C  | 4.16912100  | 2.45212300  | -0.62831900 |
| C  | 4.53175500  | 2.48794000  | -2.12831800 |
| C  | 2.90347900  | 3.31505300  | -0.42276100 |
| C  | 5.31469200  | 3.04370600  | 0.21861700  |
| H  | 5.44751600  | 1.93300100  | -2.35940000 |
| H  | 3.72666600  | 2.06925400  | -2.74347600 |
| H  | 4.69230800  | 3.52683900  | -2.45174200 |
| H  | 2.59573400  | 3.34465100  | 0.62825800  |
| H  | 3.10305500  | 4.34834800  | -0.74264600 |
| H  | 2.05509300  | 2.94329800  | -1.00773400 |
| H  | 5.50720500  | 4.08560900  | -0.07665800 |
| H  | 5.06091200  | 3.04618000  | 1.28611500  |
| H  | 6.25231800  | 2.48906600  | 0.10168900  |

|   |             |             |             |
|---|-------------|-------------|-------------|
| S | -4.50413800 | -0.16971000 | 1.23265800  |
| C | -6.02153800 | 0.53456500  | 0.40191700  |
| F | -5.66510300 | 1.07849400  | -0.76044900 |
| F | -6.57007400 | 1.45726100  | 1.18527000  |
| F | -6.88421100 | -0.45813300 | 0.19205100  |
| O | -3.95234000 | -1.14266300 | 0.27146400  |
| O | -3.58418800 | 1.12564500  | 1.30762600  |
| O | -4.86224800 | -0.57556100 | 2.57622700  |
| C | -1.95915700 | 1.07908300  | -1.19216700 |
| H | -2.99613900 | 1.20112700  | 0.49117300  |
| N | -1.49430500 | -2.98196900 | 0.04527200  |
| H | -2.41293200 | -3.21705600 | 0.42833400  |
| C | -1.16653400 | -3.96836100 | -1.00816300 |
| C | -2.25999500 | -4.03706200 | -2.06930800 |
| H | -1.01063500 | -4.96216500 | -0.55868000 |
| H | -0.21800000 | -3.65614900 | -1.45572400 |
| H | -1.99677600 | -4.76998400 | -2.83930900 |
| H | -3.22010300 | -4.33759700 | -1.63134500 |
| H | -2.39891900 | -3.06159600 | -2.54812000 |
| C | -0.51392200 | -3.00014500 | 1.16000700  |
| C | -0.98354100 | -2.14698000 | 2.33412500  |
| H | 0.43066900  | -2.61362100 | 0.76357400  |
| H | -0.34076100 | -4.03735500 | 1.48871900  |
| H | -0.24269600 | -2.17054500 | 3.13930500  |
| H | -1.10983200 | -1.10554800 | 2.02327800  |
| H | -1.93997900 | -2.50646500 | 2.73406500  |

## INT12

|   |             |             |             |
|---|-------------|-------------|-------------|
| C | -1.72248000 | 0.16744100  | -1.11905800 |
| C | -1.82618700 | 0.87966900  | -2.32359400 |
| C | -0.44290200 | -0.06810200 | -0.54621400 |
| C | -0.68840200 | 1.36076700  | -2.96670200 |
| H | -2.80780900 | 1.06769200  | -2.75300700 |
| C | 0.71188600  | 0.46381400  | -1.16998700 |
| C | 0.56460700  | 1.15201800  | -2.38597400 |
| H | -0.77382600 | 1.90108300  | -3.90748600 |
| H | 1.44716600  | 1.53887700  | -2.89033900 |
| C | -2.71524000 | -0.47722700 | 1.54135100  |
| C | -1.33886300 | -0.67358100 | 1.80629300  |
| C | -3.60299100 | -0.30351200 | 2.61378700  |
| C | -0.90270400 | -0.68387600 | 3.14447100  |
| C | -3.15978100 | -0.32614500 | 3.93661000  |
| C | -1.80126400 | -0.51734800 | 4.19729900  |
| H | 0.15548200  | -0.80489400 | 3.35729900  |

|    |             |             |             |
|----|-------------|-------------|-------------|
| H  | -3.86253800 | -0.18694600 | 4.75411300  |
| H  | -1.43644800 | -0.52297900 | 5.22169800  |
| H  | -4.65886600 | -0.13998000 | 2.40745900  |
| Si | -3.26055500 | -0.45855800 | -0.25128300 |
| C  | -0.34690800 | -0.88858000 | 0.70660700  |
| C  | 0.54066800  | -1.90474200 | 0.86967900  |
| C  | 1.58041600  | -2.38091500 | -0.05538700 |
| C  | 1.71006600  | -3.77445500 | -0.22681800 |
| C  | 2.44560500  | -1.50651700 | -0.75241300 |
| C  | 2.62570500  | -4.30821400 | -1.12956900 |
| H  | 1.06030800  | -4.43859900 | 0.34091000  |
| C  | 3.33999400  | -2.06313600 | -1.68180700 |
| C  | 3.43474400  | -3.44507400 | -1.87341100 |
| H  | 2.70040600  | -5.38474900 | -1.26056400 |
| H  | 3.98648900  | -1.40929000 | -2.26369400 |
| H  | 4.14351000  | -3.84605600 | -2.59513100 |
| Pd | 2.50678600  | 0.44183000  | -0.27201200 |
| H  | 0.40372100  | -2.52630100 | 1.75474800  |
| C  | -4.64075400 | 0.82058400  | -0.45784200 |
| C  | -4.29932900 | 2.17399300  | -0.25917600 |
| C  | -5.98374400 | 0.53252300  | -0.75667300 |
| C  | -5.25093700 | 3.18923400  | -0.35240200 |
| H  | -3.26754700 | 2.43637600  | -0.03595800 |
| C  | -6.94360600 | 1.54403600  | -0.85305400 |
| H  | -6.29732400 | -0.49307900 | -0.92168600 |
| C  | -6.57963200 | 2.87552300  | -0.65056500 |
| H  | -4.95748100 | 4.22438200  | -0.19534700 |
| H  | -7.97447100 | 1.29005700  | -1.08749300 |
| H  | -7.32444800 | 3.66387600  | -0.72564000 |
| C  | -3.72579500 | -2.22433700 | -0.85163300 |
| C  | -4.16707900 | -2.17913700 | -2.32950800 |
| C  | -2.47173300 | -3.12107200 | -0.74078800 |
| C  | -4.83564000 | -2.83929900 | 0.02653700  |
| H  | -5.06762400 | -1.57378300 | -2.48181500 |
| H  | -3.37635000 | -1.76517800 | -2.96714200 |
| H  | -4.38604300 | -3.19453700 | -2.69151600 |
| H  | -2.12434700 | -3.20749100 | 0.29439400  |
| H  | -2.70655600 | -4.13379700 | -1.10043000 |
| H  | -1.63650200 | -2.73895900 | -1.33747200 |
| H  | -5.04681500 | -3.86910700 | -0.29752000 |
| H  | -4.53380900 | -2.87908100 | 1.08011300  |
| H  | -5.77841100 | -2.28385000 | -0.02584500 |
| N  | 4.48161600  | 0.19769400  | 0.91447000  |
| H  | 4.69750400  | 1.11897900  | 1.30082500  |



|   |             |             |             |
|---|-------------|-------------|-------------|
| C | 4.26164000  | -0.73088400 | 2.05259200  |
| C | 3.20581200  | -0.21724500 | 3.02359300  |
| H | 5.21207500  | -0.90415800 | 2.58356700  |
| H | 3.94014200  | -1.68433000 | 1.62283600  |
| H | 3.08032300  | -0.92537600 | 3.84987500  |
| H | 3.49056300  | 0.75117900  | 3.45493100  |
| H | 2.24513400  | -0.10514300 | 2.51452700  |
| C | 5.64594200  | -0.23851600 | 0.10834400  |
| C | 5.94458900  | 0.71121500  | -1.04442600 |
| H | 5.40416900  | -1.23203900 | -0.27956200 |
| H | 6.53311500  | -0.34218700 | 0.75455600  |
| H | 6.83305700  | 0.37477100  | -1.58967300 |
| H | 5.10182400  | 0.74593800  | -1.74051900 |
| H | 6.13746500  | 1.73091700  | -0.68796300 |
| N | 2.31512100  | 2.70968600  | 0.14241400  |
| H | 1.49282500  | 2.88311500  | -0.43920100 |
| C | 1.96187400  | 3.05351500  | 1.53876600  |
| C | 0.62753400  | 2.44691900  | 1.95763200  |
| H | 1.92941200  | 4.14926200  | 1.65952900  |
| H | 2.76909000  | 2.68647000  | 2.18375100  |
| H | 0.39632600  | 2.71582900  | 2.99356900  |
| H | -0.18893100 | 2.81025600  | 1.32237100  |
| H | 0.64012500  | 1.35979900  | 1.87649700  |
| C | 3.42559800  | 3.53660500  | -0.37449600 |
| C | 3.55065900  | 3.43890800  | -1.89158200 |
| H | 4.34910100  | 3.19492800  | 0.10849300  |
| H | 3.28561800  | 4.59048600  | -0.08191200 |
| H | 4.40687700  | 4.02526900  | -2.24146900 |
| H | 3.68425000  | 2.40044700  | -2.20578800 |
| H | 2.65030600  | 3.82675900  | -2.38243000 |

**TS8**

|   |             |             |             |
|---|-------------|-------------|-------------|
| C | -1.65487700 | 0.02370900  | -1.14787600 |
| C | -1.70832500 | 0.62830000  | -2.40881900 |
| C | -0.39255400 | -0.31470900 | -0.58054100 |
| C | -0.54103000 | 0.88068800  | -3.14102600 |
| H | -2.67338800 | 0.89332400  | -2.83532400 |
| C | 0.79842200  | 0.02551500  | -1.28677300 |
| C | 0.69297900  | 0.56680000  | -2.58729200 |
| H | -0.60123000 | 1.32456800  | -4.13256100 |
| H | 1.60199900  | 0.75934800  | -3.15232600 |
| C | -2.67300100 | -0.61086900 | 1.51802900  |
| C | -1.31108300 | -0.90565400 | 1.77091000  |
| C | -3.55336400 | -0.44019100 | 2.59747500  |

|    |             |             |             |
|----|-------------|-------------|-------------|
| C  | -0.88506700 | -1.00449400 | 3.11122500  |
| C  | -3.12147200 | -0.56099500 | 3.91789900  |
| C  | -1.77696500 | -0.84355400 | 4.16918200  |
| H  | 0.16482800  | -1.18194300 | 3.32415800  |
| H  | -3.81890700 | -0.42352100 | 4.74014900  |
| H  | -1.41613300 | -0.92133200 | 5.19201600  |
| H  | -4.59581200 | -0.19952500 | 2.39771200  |
| Si | -3.22795300 | -0.46631100 | -0.26222500 |
| C  | -0.30909500 | -1.08695400 | 0.68027600  |
| C  | 0.65123300  | -2.05185200 | 0.84810100  |
| C  | 1.71270700  | -2.37340600 | -0.08248500 |
| C  | 2.18254800  | -3.70371500 | -0.17477800 |
| C  | 2.26143400  | -1.37878800 | -0.94012800 |
| C  | 3.10267800  | -4.07273000 | -1.14566100 |
| H  | 1.78432800  | -4.45057400 | 0.51006100  |
| C  | 3.14237900  | -1.79192000 | -1.96622200 |
| C  | 3.56616000  | -3.11297700 | -2.06287200 |
| H  | 3.44258500  | -5.10277200 | -1.21359000 |
| H  | 3.51796600  | -1.05531400 | -2.67305200 |
| H  | 4.26924400  | -3.40188300 | -2.84125200 |
| Pd | 2.45884000  | 0.50954300  | -0.21887500 |
| H  | 0.54525700  | -2.72033600 | 1.70071000  |
| C  | -4.50245900 | 0.92211600  | -0.42912100 |
| C  | -4.04018800 | 2.25279000  | -0.46876000 |
| C  | -5.89442900 | 0.72216700  | -0.46062000 |
| C  | -4.92322300 | 3.33106600  | -0.53571300 |
| H  | -2.97004400 | 2.44544900  | -0.45754700 |
| C  | -6.78522600 | 1.79646900  | -0.52791500 |
| H  | -6.30001300 | -0.28427400 | -0.43583500 |
| C  | -6.30135500 | 3.10496400  | -0.56553900 |
| H  | -4.53715000 | 4.34710100  | -0.56754300 |
| H  | -7.85612800 | 1.61021800  | -0.55291000 |
| H  | -6.99245700 | 3.94240400  | -0.61942700 |
| C  | -3.84348700 | -2.17096700 | -0.91208000 |
| C  | -4.41050500 | -2.01972000 | -2.33811200 |
| C  | -2.62975500 | -3.12759200 | -0.95498800 |
| C  | -4.90558700 | -2.78629700 | 0.02288100  |
| H  | -5.28905900 | -1.36494300 | -2.36850800 |
| H  | -3.66058500 | -1.60488300 | -3.02301200 |
| H  | -4.71219100 | -3.00050500 | -2.73450000 |
| H  | -2.18448000 | -3.26649200 | 0.03668900  |
| H  | -2.94650100 | -4.11581600 | -1.31973200 |
| H  | -1.84186700 | -2.76086500 | -1.62151700 |
| H  | -5.18465500 | -3.78914500 | -0.33277700 |

|   |             |             |             |
|---|-------------|-------------|-------------|
| H | -4.52752200 | -2.89016500 | 1.04663400  |
| H | -5.82686800 | -2.19481200 | 0.06817600  |
| N | 4.43712100  | 0.30402500  | 1.01846500  |
| H | 4.66531100  | 1.19758200  | 1.45859400  |
| C | 4.21980000  | -0.69232100 | 2.09252700  |
| C | 3.14807600  | -0.24300800 | 3.07868900  |
| H | 5.16546100  | -0.89244000 | 2.62445800  |
| H | 3.90967200  | -1.62310700 | 1.60607200  |
| H | 3.02474000  | -0.99045000 | 3.87013400  |
| H | 3.41469300  | 0.70872000  | 3.55686500  |
| H | 2.19015500  | -0.11875000 | 2.56666800  |
| C | 5.57200100  | -0.08303100 | 0.15246600  |
| C | 5.88719900  | 0.98714400  | -0.88585800 |
| H | 5.28738500  | -1.01478300 | -0.34779500 |
| H | 6.46651400  | -0.29253000 | 0.76352500  |
| H | 6.75321000  | 0.69008400  | -1.48726200 |
| H | 5.03248200  | 1.13339100  | -1.55265200 |
| H | 6.12287200  | 1.94938100  | -0.41245400 |
| N | 2.05387700  | 2.77106300  | 0.24981600  |
| H | 1.21370400  | 2.89271800  | -0.31766900 |
| C | 1.69683300  | 3.04721900  | 1.65682300  |
| C | 0.41389100  | 2.32856400  | 2.06060800  |
| H | 1.58678700  | 4.13332100  | 1.81990400  |
| H | 2.53450500  | 2.71354000  | 2.28151700  |
| H | 0.17874800  | 2.52140500  | 3.11239100  |
| H | -0.43687900 | 2.66918100  | 1.45747300  |
| H | 0.50163500  | 1.25060200  | 1.91714700  |
| C | 3.09495900  | 3.67906800  | -0.26804200 |
| C | 3.19520200  | 3.60690900  | -1.78897300 |
| H | 4.04764200  | 3.38668400  | 0.19048600  |
| H | 2.89458800  | 4.71913100  | 0.04221800  |
| H | 4.00659500  | 4.24749400  | -2.15061300 |
| H | 3.38160000  | 2.57982400  | -2.11569100 |
| H | 2.26237500  | 3.94297500  | -2.25816600 |

**2**

|   |             |             |             |
|---|-------------|-------------|-------------|
| C | -1.60413000 | 3.97782900  | -0.46598300 |
| C | -1.94849100 | 2.68209300  | -0.08860200 |
| C | -0.98905500 | 1.66034900  | 0.00515400  |
| C | 0.36868900  | 1.94691900  | -0.28160900 |
| C | 0.68815200  | 3.25184300  | -0.71490600 |
| C | -0.27509700 | 4.25333900  | -0.79267900 |
| C | 1.46265300  | 0.93009600  | -0.18297200 |
| C | 1.24582700  | -0.51088400 | -0.32571800 |

|    |             |             |             |
|----|-------------|-------------|-------------|
| C  | -0.05765300 | -1.09075400 | -0.25249500 |
| C  | -0.22991800 | -2.44762500 | -0.50772200 |
| H  | -1.22817700 | -2.87833500 | -0.46461900 |
| C  | 0.86371100  | -3.27288400 | -0.80597700 |
| C  | 2.37443800  | -1.37302000 | -0.52173500 |
| H  | -2.36203300 | 4.75394000  | -0.53073300 |
| H  | -2.99054400 | 2.44870200  | 0.11874800  |
| H  | 1.69932700  | 3.48468200  | -1.03085000 |
| H  | 0.01194900  | 5.24611600  | -1.12973300 |
| H  | 0.71513500  | -4.32798500 | -1.01974900 |
| C  | 3.73031700  | -0.85168900 | -0.41255300 |
| C  | 2.75141700  | 1.36939200  | -0.00710300 |
| C  | 3.89728600  | 0.52369000  | -0.09352700 |
| H  | 2.93838100  | 2.41973400  | 0.19249300  |
| C  | 5.19776600  | 1.05419400  | 0.08505300  |
| C  | 6.31516000  | 0.25654800  | -0.05987500 |
| H  | 7.30922300  | 0.67302200  | 0.07713900  |
| C  | 4.89408600  | -1.64159000 | -0.56401400 |
| C  | 6.15740200  | -1.10276200 | -0.39261200 |
| H  | 7.03230200  | -1.73582500 | -0.51310900 |
| H  | 5.30168800  | 2.10841200  | 0.33136300  |
| H  | 4.81179800  | -2.69354900 | -0.81343200 |
| Si | -1.47868100 | -0.08840700 | 0.43506100  |
| C  | -3.09310000 | -0.51739300 | -0.44625300 |
| C  | -4.10865600 | -1.32517100 | 0.09611900  |
| C  | -3.28040300 | -0.03276200 | -1.75667300 |
| C  | -5.25880100 | -1.63766000 | -0.63317900 |
| H  | -4.01276000 | -1.71894800 | 1.10275200  |
| C  | -4.42577900 | -0.34114700 | -2.49078600 |
| H  | -2.52135900 | 0.60245600  | -2.20697600 |
| C  | -5.41996300 | -1.14621400 | -1.92920200 |
| H  | -6.02816100 | -2.26312800 | -0.18735700 |
| H  | -4.54405400 | 0.04775400  | -3.49903600 |
| H  | -6.31443100 | -1.38720800 | -2.49792700 |
| C  | -1.53754700 | -0.30932100 | 2.34647600  |
| C  | -1.63066900 | -1.79400500 | 2.75545800  |
| C  | -0.22624900 | 0.26693900  | 2.92809700  |
| C  | -2.72888400 | 0.48121800  | 2.92650600  |
| H  | -2.55766900 | -2.27136000 | 2.41941100  |
| H  | -0.79362500 | -2.37504200 | 2.35163300  |
| H  | -1.60012600 | -1.88409100 | 3.85113100  |
| H  | -0.10719400 | 1.33049900  | 2.69347500  |
| H  | -0.22657300 | 0.16426900  | 4.02293200  |
| H  | 0.65561600  | -0.26048800 | 2.54654800  |

|   |             |             |             |
|---|-------------|-------------|-------------|
| H | -2.73566300 | 0.40840100  | 4.02388900  |
| H | -2.66585200 | 1.54598500  | 2.66927600  |
| H | -3.69316000 | 0.10752700  | 2.56419200  |
| C | 2.13910500  | -2.74320900 | -0.78313600 |
| H | 2.97781800  | -3.40600000 | -0.96364500 |

**INT14**

|    |             |             |             |
|----|-------------|-------------|-------------|
| C  | -0.68972000 | -1.49659500 | -2.29566000 |
| C  | -1.60949300 | -1.68829200 | -1.22978600 |
| C  | -2.68734900 | -0.85765400 | -0.93093100 |
| C  | -2.93071800 | 0.20930100  | -1.87493900 |
| C  | -2.07259800 | 0.40577900  | -2.96444600 |
| C  | -0.94236200 | -0.39726600 | -3.15773400 |
| Si | -3.76160000 | -1.08024400 | 0.64779900  |
| C  | -3.96089600 | 0.60771700  | 1.48985700  |
| C  | -3.07038900 | 1.66586900  | 1.23692400  |
| C  | -4.90259000 | 0.78966100  | 2.52028800  |
| C  | -4.97179700 | 1.98283900  | 3.24468100  |
| C  | -4.08840200 | 3.02538200  | 2.95907300  |
| C  | -3.13271100 | 2.86148900  | 1.95439100  |
| H  | -0.00209300 | -2.27689100 | -2.58802800 |
| H  | -2.27828700 | 1.21811800  | -3.65470700 |
| H  | -0.33919300 | -0.27869800 | -4.05265300 |
| H  | -2.31868500 | 1.56747300  | 0.46099900  |
| H  | -5.58333200 | -0.01307900 | 2.78458600  |
| H  | -5.71340900 | 2.09416200  | 4.03202300  |
| H  | -4.14267000 | 3.95806100  | 3.51484800  |
| H  | -2.44440200 | 3.66559900  | 1.71688100  |
| O  | -0.74331900 | -4.88775600 | 0.67607600  |
| S  | -0.69599300 | -4.19569800 | -0.59515600 |
| O  | 0.53085600  | -4.05898100 | -1.36602900 |
| O  | -1.43059500 | -2.77682900 | -0.32692200 |
| C  | -1.93408600 | -5.02920900 | -1.73677200 |
| F  | -2.37291400 | -4.15731200 | -2.65090500 |
| F  | -2.96169400 | -5.49372900 | -1.03109600 |
| F  | -1.31861300 | -6.04050500 | -2.34646300 |
| C  | -2.83033100 | -2.05893000 | 1.98200200  |
| C  | -3.15574100 | -3.35410100 | 2.41598600  |
| C  | -1.74905000 | -1.41669000 | 2.61806300  |
| C  | -2.45379200 | -3.97553700 | 3.45120600  |
| H  | -3.96203000 | -3.90433500 | 1.94376900  |
| C  | -1.03425000 | -2.03501400 | 3.64284800  |
| H  | -1.45468100 | -0.41532400 | 2.31538400  |
| C  | -1.39477900 | -3.31516900 | 4.07226300  |

|   |             |             |             |
|---|-------------|-------------|-------------|
| H | -2.73150300 | -4.97869000 | 3.76415400  |
| H | -0.19033600 | -1.52387000 | 4.09585400  |
| H | -0.84663600 | -3.79555500 | 4.87932300  |
| C | -5.42284500 | -1.92033400 | 0.12835100  |
| C | -6.32782800 | -2.25302300 | 1.33716800  |
| C | -6.22901400 | -1.00939900 | -0.82218600 |
| C | -5.08814700 | -3.22294300 | -0.63311400 |
| H | -7.16908700 | -2.87863700 | 1.00511900  |
| H | -5.81002900 | -2.79228300 | 2.13569200  |
| H | -6.76159300 | -1.34652000 | 1.77179900  |
| H | -5.69737400 | -0.81750200 | -1.75843000 |
| H | -7.18178600 | -1.49757100 | -1.07546200 |
| H | -6.45899900 | -0.03912200 | -0.36931900 |
| H | -6.01484100 | -3.69433400 | -0.99145700 |
| H | -4.45822000 | -3.02943900 | -1.50827300 |
| H | -4.56968400 | -3.95726700 | -0.01169800 |
| C | -3.96219500 | 1.17016300  | -1.71246600 |
| C | -4.76573500 | 2.07773400  | -1.60819700 |
| C | -5.66254700 | 3.14839600  | -1.34987400 |
| C | -6.19254200 | 3.31896400  | -0.05332200 |
| C | -6.00281900 | 4.07500900  | -2.35679300 |
| C | -7.03847700 | 4.39014100  | 0.21936000  |
| H | -5.92040200 | 2.61627100  | 0.72567600  |
| C | -6.84901000 | 5.14402900  | -2.07093600 |
| H | -5.59726500 | 3.94446000  | -3.35595800 |
| C | -7.37023700 | 5.30626100  | -0.78381500 |
| H | -7.43557500 | 4.51343100  | 1.22352900  |
| H | -7.10382900 | 5.85221100  | -2.85500500 |
| H | -8.02967900 | 6.14164400  | -0.56444600 |
| P | 1.14513300  | 2.23580400  | -0.52443700 |
| P | 2.60272300  | -1.12746200 | -0.74058000 |
| C | 3.68720100  | -3.45724800 | -4.62737000 |
| C | 3.67982200  | -4.13621100 | -3.40923600 |
| C | 3.40514900  | -3.45680600 | -2.21926100 |
| C | 3.12553000  | -2.08362100 | -2.23230400 |
| C | 3.11542700  | -1.41242300 | -3.47045200 |
| C | 3.40548400  | -2.08747800 | -4.65406200 |
| H | 3.38674300  | -4.00605300 | -1.28551500 |
| H | 2.87805400  | -0.35204700 | -3.50069300 |
| C | -2.05746600 | 5.60878000  | -0.26801400 |
| C | -0.95561400 | 5.66318400  | 0.59312000  |
| C | 0.00510600  | 4.65256400  | 0.56662300  |
| C | -0.11288000 | 3.57870700  | -0.33372200 |
| C | -1.22798400 | 3.53046500  | -1.18162900 |

|   |             |             |             |
|---|-------------|-------------|-------------|
| C | -2.19721700 | 4.53659300  | -1.14847300 |
| H | 0.83541900  | 4.68809300  | 1.26520900  |
| H | -1.34446600 | 2.68600700  | -1.85267700 |
| C | 4.74305900  | 4.48986200  | -2.42654600 |
| C | 4.26340400  | 4.91097700  | -1.18355200 |
| C | 3.18904600  | 4.25312000  | -0.58883200 |
| C | 2.58093600  | 3.16019200  | -1.22487100 |
| C | 3.06711400  | 2.74915400  | -2.47312800 |
| C | 4.14221400  | 3.40867000  | -3.07180500 |
| H | 2.84775700  | 4.57538700  | 0.38835400  |
| H | 2.60165200  | 1.89946200  | -2.96488500 |
| C | 3.13060100  | -4.11698800 | 2.76767800  |
| C | 4.24404700  | -3.74116200 | 2.00994800  |
| C | 4.09596600  | -2.83919000 | 0.95851800  |
| C | 2.83214000  | -2.30705500 | 0.65077100  |
| C | 1.72784100  | -2.67357800 | 1.42713500  |
| C | 1.87583500  | -3.58283600 | 2.47664900  |
| H | 4.96223100  | -2.54415400 | 0.37196800  |
| H | 0.75144800  | -2.24503100 | 1.22036900  |
| H | 5.90993100  | 4.57976800  | 2.74334500  |
| C | 3.91934300  | 0.99500600  | 0.57894400  |
| C | 4.01307400  | 0.04481000  | -0.43998700 |
| C | 5.16287100  | 0.02912400  | -1.27731800 |
| H | 5.23914400  | -0.71617500 | -2.06058300 |
| C | 6.17185900  | 0.94772400  | -1.12466700 |
| H | 7.03441000  | 0.92803100  | -1.78693600 |
| C | 6.11062000  | 1.92974700  | -0.10619400 |
| C | 4.98359500  | 1.93668400  | 0.77696700  |
| H | 4.10782200  | 2.92986700  | 2.49347300  |
| C | 4.94974400  | 2.91507700  | 1.81078400  |
| C | 5.95941600  | 3.84152200  | 1.94729400  |
| H | 7.84955700  | 4.58147300  | 1.17419500  |
| C | 7.06154800  | 3.84215900  | 1.05884100  |
| H | 7.97606100  | 2.88830700  | -0.63021000 |
| C | 7.13276400  | 2.90191000  | 0.05635200  |
| H | 3.20367000  | -1.28051800 | 6.31742700  |
| C | 0.65098500  | 1.24095000  | 3.41276000  |
| H | -0.16846900 | 1.30348100  | 4.12497400  |
| C | 0.52809800  | 1.82163600  | 2.17560000  |
| H | -0.39593700 | 2.32804500  | 1.92713600  |
| C | 1.57579400  | 1.75510800  | 1.21171300  |
| C | 2.75140300  | 1.06684000  | 1.52478600  |
| C | 2.89322400  | 0.44963700  | 2.81366700  |
| C | 1.82833500  | 0.53684800  | 3.76834500  |

|    |             |             |             |
|----|-------------|-------------|-------------|
| H  | 1.15265000  | -0.00997300 | 5.74832800  |
| C  | 1.96948600  | -0.09123100 | 5.03466700  |
| C  | 3.10946800  | -0.79481200 | 5.35001600  |
| H  | 5.05702200  | -1.45228700 | 4.65610400  |
| C  | 4.16316700  | -0.88643500 | 4.40944300  |
| H  | 4.87225100  | -0.36067100 | 2.46673300  |
| C  | 4.06237400  | -0.27405200 | 3.18101200  |
| H  | 3.90278300  | -3.98912100 | -5.55022500 |
| H  | -2.81448200 | 6.38756600  | -0.23539300 |
| H  | 5.58706300  | 4.99884700  | -2.88433200 |
| H  | 3.24384000  | -4.82363600 | 3.58576800  |
| H  | 3.88434100  | -5.20323400 | -3.37876700 |
| H  | 3.40354300  | -1.54763500 | -5.59771000 |
| H  | -0.85146300 | 6.48758600  | 1.29398300  |
| H  | -3.06979300 | 4.46613800  | -1.78992300 |
| H  | 1.00392700  | -3.87173000 | 3.05164800  |
| H  | 5.22531400  | -4.14902600 | 2.23947100  |
| H  | 4.51400800  | 3.07053000  | -4.03542100 |
| H  | 4.74074900  | 5.73804300  | -0.66616900 |
| Pd | 0.64904100  | 0.09341800  | -1.37747200 |

**TS9**

|    |             |             |             |
|----|-------------|-------------|-------------|
| C  | 0.24542800  | 1.50695600  | -2.56982900 |
| C  | 0.86656700  | 1.79455300  | -1.33633500 |
| C  | 2.19818300  | 1.49970000  | -0.99006300 |
| C  | 2.85723400  | 0.66065100  | -1.93408200 |
| C  | 2.21241600  | 0.23061400  | -3.12353700 |
| C  | 0.93217600  | 0.65431800  | -3.44397000 |
| Si | 2.95217200  | 2.14806400  | 0.65035200  |
| C  | 3.83822500  | 0.72487300  | 1.55007700  |
| C  | 3.57700000  | -0.61794300 | 1.22957200  |
| C  | 4.68638400  | 0.96527200  | 2.64819500  |
| C  | 5.26449100  | -0.08312600 | 3.36978200  |
| C  | 5.00273600  | -1.40757900 | 3.01370300  |
| C  | 4.15161300  | -1.67389800 | 1.93973000  |
| H  | -0.68009500 | 1.98884500  | -2.85557700 |
| H  | 2.76481700  | -0.40776900 | -3.80548400 |
| H  | 0.47597400  | 0.36413000  | -4.38617500 |
| H  | 2.92015900  | -0.84908800 | 0.40067400  |
| H  | 4.89129900  | 1.98118900  | 2.96805000  |
| H  | 5.91708900  | 0.13790600  | 4.21093800  |
| H  | 5.45813200  | -2.22488600 | 3.56709400  |
| H  | 3.94061000  | -2.69717300 | 1.64391700  |
| O  | -0.35247700 | 5.59232400  | 0.28592100  |



|   |             |             |             |
|---|-------------|-------------|-------------|
| S | -0.67336300 | 4.37279600  | -0.45721200 |
| O | -1.61231800 | 3.39575800  | 0.14354900  |
| O | 0.56779600  | 3.69722900  | -1.05600400 |
| C | -1.55836200 | 4.96962100  | -1.98547700 |
| F | -1.78166100 | 3.94726100  | -2.82845700 |
| F | -0.82679500 | 5.89036600  | -2.61815500 |
| F | -2.73607500 | 5.50383800  | -1.64290600 |
| C | 1.51605900  | 2.55481900  | 1.81351500  |
| C | 1.16470000  | 3.83984900  | 2.24870300  |
| C | 0.76819800  | 1.46713300  | 2.31846100  |
| C | 0.11929700  | 4.03823300  | 3.15518300  |
| H | 1.67450700  | 4.71087100  | 1.85588600  |
| C | -0.27694700 | 1.65888300  | 3.22461800  |
| H | 1.03865300  | 0.44985200  | 2.05215800  |
| C | -0.59773200 | 2.95063800  | 3.64992200  |
| H | -0.14288400 | 5.04935300  | 3.45261600  |
| H | -0.83666200 | 0.80344800  | 3.58948300  |
| H | -1.41105300 | 3.10503600  | 4.35484700  |
| C | 4.13478000  | 3.62579700  | 0.26649500  |
| C | 4.62934800  | 4.33707100  | 1.54822100  |
| C | 5.37326700  | 3.10039800  | -0.49450200 |
| C | 3.42289400  | 4.66415100  | -0.63027500 |
| H | 5.18204000  | 5.24515300  | 1.26779100  |
| H | 3.81702400  | 4.64076500  | 2.21502300  |
| H | 5.32159800  | 3.71343900  | 2.12234100  |
| H | 5.10692900  | 2.66965600  | -1.46438000 |
| H | 6.06911700  | 3.93123000  | -0.68133300 |
| H | 5.91366700  | 2.33296500  | 0.07151700  |
| H | 4.12903300  | 5.46960900  | -0.88005600 |
| H | 3.07311800  | 4.22040400  | -1.56717600 |
| H | 2.55082700  | 5.11722800  | -0.15157600 |
| C | 4.17394100  | 0.16767100  | -1.71943100 |
| C | 5.26266300  | -0.34461200 | -1.54829900 |
| C | 6.49946800  | -0.96016900 | -1.21548200 |
| C | 7.02684600  | -0.80586800 | 0.08322400  |
| C | 7.18915100  | -1.75926800 | -2.14935800 |
| C | 8.21518300  | -1.44180600 | 0.43161100  |
| H | 6.48910700  | -0.20266600 | 0.80582600  |
| C | 8.37746000  | -2.39040900 | -1.78895500 |
| H | 6.78304900  | -1.87563700 | -3.14996900 |
| C | 8.89376600  | -2.23454300 | -0.49887300 |
| H | 8.60945100  | -1.32175800 | 1.43701000  |
| H | 8.90264000  | -3.00451400 | -2.51554800 |
| H | 9.82037500  | -2.72937200 | -0.22077400 |

|   |             |             |             |
|---|-------------|-------------|-------------|
| P | 0.42704000  | -2.15551400 | -0.55940600 |
| P | -2.96799900 | 0.26913300  | -0.12704100 |
| C | -4.55427300 | 2.80169700  | -3.70671900 |
| C | -4.82471800 | 3.19313300  | -2.39602500 |
| C | -4.39408200 | 2.41258900  | -1.32126200 |
| C | -3.68204100 | 1.22583500  | -1.54397300 |
| C | -3.39865800 | 0.84893400  | -2.86856400 |
| C | -3.83875100 | 1.62421000  | -3.94004000 |
| H | -4.60186800 | 2.73911000  | -0.30855100 |
| H | -2.85142000 | -0.06693400 | -3.06329700 |
| C | 4.06108600  | -5.04577800 | -0.10226800 |
| C | 2.91629500  | -5.28553000 | 0.66330600  |
| C | 1.80728200  | -4.44458800 | 0.55169000  |
| C | 1.82615800  | -3.34986600 | -0.32872900 |
| C | 2.97859000  | -3.12770700 | -1.09899800 |
| C | 4.08936900  | -3.96520100 | -0.98613400 |
| H | 0.92960200  | -4.63043700 | 1.16399500  |
| H | 3.02124700  | -2.27340000 | -1.76696100 |
| C | -1.96720400 | -4.19904600 | -3.98394800 |
| C | -1.32227800 | -5.00745000 | -3.04430300 |
| C | -0.61135900 | -4.43136300 | -1.99219800 |
| C | -0.54442000 | -3.03580200 | -1.86001900 |
| C | -1.17140300 | -2.23476300 | -2.82453500 |
| C | -1.88823100 | -2.80972700 | -3.87460500 |
| H | -0.11480300 | -5.07020000 | -1.27009200 |
| H | -1.08686900 | -1.15603300 | -2.74220500 |
| C | -5.67691800 | 1.60160200  | 3.39757900  |
| C | -6.17170700 | 0.68560300  | 2.46399800  |
| C | -5.37176200 | 0.27106300  | 1.40072400  |
| C | -4.06557200 | 0.76612200  | 1.26341800  |
| C | -3.58271000 | 1.70037500  | 2.18772800  |
| C | -4.38658700 | 2.11273800  | 3.25278400  |
| H | -5.75869400 | -0.44824000 | 0.68443300  |
| H | -2.59009600 | 2.11594400  | 2.06420900  |
| H | -2.41167700 | -7.09611500 | 0.78835800  |
| C | -2.82968600 | -2.51883000 | 0.20862100  |
| C | -3.47088200 | -1.47913000 | -0.46176400 |
| C | -4.49633300 | -1.77756900 | -1.40332000 |
| H | -5.00752500 | -0.96616800 | -1.90848100 |
| C | -4.83536600 | -3.07399200 | -1.70013700 |
| H | -5.60827300 | -3.28278500 | -2.43602800 |
| C | -4.18539000 | -4.15785000 | -1.05960000 |
| C | -3.19275900 | -3.87766900 | -0.06691800 |
| H | -1.83654000 | -4.77377100 | 1.36464300  |

|    |             |             |             |
|----|-------------|-------------|-------------|
| C  | -2.57607900 | -4.97423600 | 0.59750500  |
| C  | -2.89865900 | -6.27299600 | 0.27249600  |
| H  | -4.10315700 | -7.57456700 | -0.98037500 |
| C  | -3.86092700 | -6.54541800 | -0.72950900 |
| H  | -5.24005200 | -5.70510900 | -2.14066100 |
| C  | -4.49337900 | -5.50721400 | -1.37533500 |
| H  | -3.70498100 | -1.52670200 | 6.26130900  |
| C  | -0.05078300 | -1.89869300 | 3.46367100  |
| H  | 0.64479900  | -1.74072500 | 4.28436300  |
| C  | 0.42245800  | -2.07402400 | 2.19052700  |
| H  | 1.49337300  | -2.05270200 | 2.03050600  |
| C  | -0.45038200 | -2.26645100 | 1.07402500  |
| C  | -1.82570600 | -2.27240000 | 1.29536000  |
| C  | -2.34326500 | -2.11084900 | 2.63039800  |
| C  | -1.44431300 | -1.89946400 | 3.72423100  |
| H  | -1.26008400 | -1.51771300 | 5.84353100  |
| C  | -1.96054800 | -1.68940700 | 5.02959400  |
| C  | -3.31790400 | -1.69792800 | 5.26062800  |
| H  | -5.28127500 | -1.94446500 | 4.37222800  |
| C  | -4.21058400 | -1.93750600 | 4.19043600  |
| H  | -4.43524600 | -2.32295200 | 2.10626300  |
| C  | -3.73639500 | -2.14724200 | 2.91447300  |
| H  | -4.88910200 | 3.41210300  | -4.54092800 |
| H  | 4.92923100  | -5.69170800 | -0.00225900 |
| H  | -2.52492300 | -4.65136100 | -4.79978500 |
| H  | -6.29967500 | 1.91948800  | 4.22973700  |
| H  | -5.36332000 | 4.11636300  | -2.20234600 |
| H  | -3.62059600 | 1.30910700  | -4.95742900 |
| H  | 2.88779700  | -6.12524100 | 1.35315400  |
| H  | 4.98388400  | -3.75324500 | -1.56498000 |
| H  | -4.00016300 | 2.83601000  | 3.96593900  |
| H  | -7.17993700 | 0.29246700  | 2.56677700  |
| H  | -2.38130300 | -2.17390300 | -4.60586000 |
| H  | -1.38256400 | -6.08916200 | -3.12343800 |
| Pd | -0.65464600 | 1.06643600  | -0.26606000 |

#### INT15

|    |             |             |             |
|----|-------------|-------------|-------------|
| C  | -1.03782600 | -2.20744900 | -2.31660400 |
| C  | -1.26736100 | -1.51604800 | -1.11660100 |
| C  | -2.57412400 | -1.22619500 | -0.67837100 |
| C  | -3.62385500 | -1.46455500 | -1.62675900 |
| C  | -3.37910900 | -2.11868400 | -2.84799500 |
| C  | -2.09384900 | -2.54199300 | -3.16420300 |
| Si | -3.04526000 | -0.82359600 | 1.13763600  |

|   |             |             |             |
|---|-------------|-------------|-------------|
| C | -3.85135700 | 0.88569300  | 1.30643400  |
| C | -3.99722200 | 1.77145500  | 0.22506400  |
| C | -4.31990500 | 1.31844500  | 2.56387900  |
| C | -4.90378700 | 2.57570200  | 2.73523600  |
| C | -5.03340800 | 3.43850500  | 1.64355500  |
| C | -4.57809200 | 3.03182400  | 0.38863600  |
| H | -0.02928400 | -2.49574500 | -2.59559100 |
| H | -4.20645000 | -2.28620800 | -3.53085900 |
| H | -1.90412500 | -3.08932100 | -4.08394000 |
| H | -3.67108600 | 1.47088100  | -0.76307300 |
| H | -4.22613100 | 0.66581100  | 3.42827000  |
| H | -5.25902600 | 2.87882500  | 3.71718500  |
| H | -5.49226100 | 4.41593000  | 1.76998200  |
| H | -4.68152600 | 3.68663700  | -0.47121600 |
| O | 1.26500300  | -4.99866100 | 1.49415000  |
| S | 0.68331400  | -4.39976300 | 0.28338400  |
| O | 1.24468900  | -3.01825500 | 0.01718300  |
| O | -0.76582100 | -4.51855000 | 0.07154500  |
| C | 1.43997200  | -5.34130200 | -1.13801000 |
| F | 1.23780600  | -4.68016300 | -2.29995600 |
| F | 0.88838800  | -6.55380500 | -1.24520900 |
| F | 2.76108500  | -5.48177900 | -0.96500700 |
| C | -1.50670800 | -0.82671400 | 2.23271500  |
| C | -0.74255700 | -2.00703200 | 2.32003100  |
| C | -1.17064900 | 0.22358500  | 3.10013800  |
| C | 0.31827100  | -2.12700800 | 3.21547000  |
| H | -1.00237400 | -2.85425500 | 1.69824500  |
| C | -0.09345500 | 0.12254800  | 3.98411000  |
| H | -1.75787000 | 1.13339100  | 3.09375500  |
| C | 0.65462900  | -1.05283300 | 4.04271000  |
| H | 0.87864000  | -3.05493400 | 3.24657700  |
| H | 0.16239500  | 0.96518200  | 4.62215300  |
| H | 1.49991400  | -1.13120100 | 4.71915000  |
| C | -4.21985800 | -2.22036200 | 1.86750300  |
| C | -3.83957200 | -2.49834100 | 3.34330900  |
| C | -5.71263200 | -1.82375700 | 1.85887100  |
| C | -4.04865100 | -3.53238600 | 1.06829800  |
| H | -4.55195400 | -3.22008400 | 3.76773600  |
| H | -2.83830200 | -2.92232800 | 3.44828100  |
| H | -3.87918400 | -1.59527800 | 3.96558300  |
| H | -6.09577900 | -1.67030200 | 0.85030700  |
| H | -6.30439700 | -2.62872700 | 2.31859800  |
| H | -5.90290800 | -0.91084300 | 2.43389500  |
| H | -4.61573800 | -4.33742200 | 1.55829500  |

|   |              |             |             |
|---|--------------|-------------|-------------|
| H | -4.43103200  | -3.43603400 | 0.04724100  |
| H | -3.00554800  | -3.85812500 | 0.99632700  |
| C | -4.93822800  | -0.96066000 | -1.41196700 |
| C | -6.02814800  | -0.43149500 | -1.30217600 |
| C | -7.27268900  | 0.21670000  | -1.06809500 |
| C | -7.46656300  | 0.95664100  | 0.11777200  |
| C | -8.31973800  | 0.14060900  | -2.00813200 |
| C | -8.67912900  | 1.60078400  | 0.34729400  |
| H | -6.66288200  | 1.01894300  | 0.84183500  |
| C | -9.52831200  | 0.78954700  | -1.76751600 |
| H | -8.17226200  | -0.43079000 | -2.91977300 |
| C | -9.71275500  | 1.52150500  | -0.59071300 |
| H | -8.81568200  | 2.16874900  | 1.26366700  |
| H | -10.32952100 | 0.72293600  | -2.49877300 |
| H | -10.65744900 | 2.02587300  | -0.40586400 |
| P | 0.30442500   | 1.22794800  | -1.15378600 |
| P | 2.97662000   | -0.53503800 | 0.22277500  |
| C | 5.49948900   | -3.67144100 | -2.12633400 |
| C | 6.02269200   | -3.07258000 | -0.97754100 |
| C | 5.26431100   | -2.14503100 | -0.26431900 |
| C | 3.97429700   | -1.79098500 | -0.69710500 |
| C | 3.45430500   | -2.41570500 | -1.83706000 |
| C | 4.21066400   | -3.34709200 | -2.54824300 |
| H | 5.67589500   | -1.69581100 | 0.63433800  |
| H | 2.43261900   | -2.22597900 | -2.13782800 |
| C | -3.37888300  | 3.05363900  | -3.32117700 |
| C | -2.62777500  | 3.84892900  | -2.45317200 |
| C | -1.54964900  | 3.30441400  | -1.75577700 |
| C | -1.20751500  | 1.95234400  | -1.92031700 |
| C | -1.93942800  | 1.17163300  | -2.82693400 |
| C | -3.02604500  | 1.71675900  | -3.51101400 |
| H | -0.98949500  | 3.93584200  | -1.07462100 |
| H | -1.67339300  | 0.13752300  | -2.99766200 |
| C | 3.12362200   | 2.18359200  | -4.71517500 |
| C | 2.52727100   | 3.22559200  | -3.99864500 |
| C | 1.69715100   | 2.94452800  | -2.91661700 |
| C | 1.47548400   | 1.61671000  | -2.52202900 |
| C | 2.05929800   | 0.57846600  | -3.25481300 |
| C | 2.88232500   | 0.86011200  | -4.34685000 |
| H | 1.23830700   | 3.76089700  | -2.36898800 |
| H | 1.87279300   | -0.44874700 | -2.96800300 |
| C | 4.29364600   | -1.55058100 | 4.55169700  |
| C | 4.36779700   | -0.22842900 | 4.11120700  |
| C | 3.97606600   | 0.09931500  | 2.81137200  |

|   |             |             |             |
|---|-------------|-------------|-------------|
| C | 3.49128700  | -0.88884500 | 1.94975800  |
| C | 3.39630300  | -2.21728200 | 2.40171500  |
| C | 3.80805700  | -2.54185300 | 3.69254800  |
| H | 4.05888800  | 1.12301900  | 2.47348700  |
| H | 2.99238800  | -2.99001200 | 1.75663100  |
| H | 3.19180500  | 6.87133200  | -0.98803600 |
| C | 3.18407000  | 2.32824700  | -0.02275000 |
| C | 3.77744400  | 1.08495000  | -0.25455300 |
| C | 4.98099000  | 1.03121700  | -1.01831300 |
| H | 5.45094400  | 0.07581400  | -1.20495000 |
| C | 5.55782700  | 2.15637500  | -1.54613900 |
| H | 6.47276000  | 2.07632900  | -2.12806900 |
| C | 4.95904000  | 3.42619500  | -1.37405200 |
| C | 3.76208700  | 3.51790000  | -0.59753900 |
| H | 2.23411500  | 4.89958500  | 0.09430600  |
| C | 3.14885900  | 4.79895500  | -0.47702200 |
| C | 3.68644600  | 5.90928100  | -1.08958000 |
| H | 5.29370600  | 6.69420700  | -2.32205400 |
| C | 4.87734100  | 5.80974800  | -1.84799300 |
| H | 6.41116900  | 4.49424400  | -2.56649100 |
| C | 5.49968800  | 4.59014800  | -1.98155800 |
| H | 2.44952100  | 4.90432900  | 5.58982800  |
| C | -0.34087400 | 3.26640700  | 2.30485700  |
| H | -1.22769500 | 3.53355200  | 2.87378500  |
| C | -0.47432000 | 2.62319300  | 1.10253500  |
| H | -1.46901300 | 2.37359800  | 0.75323900  |
| C | 0.66399500  | 2.26825100  | 0.32352700  |
| C | 1.94693300  | 2.54063000  | 0.80021400  |
| C | 2.09927500  | 3.18480700  | 2.07928000  |
| C | 0.93933900  | 3.54247100  | 2.84001400  |
| H | 0.19886200  | 4.41415900  | 4.67412600  |
| C | 1.09310400  | 4.16217600  | 4.10943000  |
| C | 2.34247100  | 4.43571500  | 4.61566300  |
| H | 4.47958200  | 4.34672800  | 4.24884000  |
| C | 3.49343300  | 4.11406100  | 3.85676600  |
| H | 4.26823200  | 3.29604200  | 2.04917700  |
| C | 3.37484300  | 3.51601700  | 2.62222900  |
| H | 6.08564000  | -4.40400800 | -2.67444100 |
| H | -4.23090800 | 3.47434400  | -3.84781100 |
| H | 3.77168200  | 2.40548400  | -5.55863500 |
| H | 4.60845100  | -1.80872300 | 5.55942100  |
| H | 7.01804200  | -3.33451600 | -0.62910900 |
| H | 3.77148500  | -3.84587800 | -3.40686300 |
| H | -2.88554700 | 4.89442200  | -2.30744400 |

|    |             |             |             |
|----|-------------|-------------|-------------|
| H  | -3.60041500 | 1.08486500  | -4.18156800 |
| H  | 3.73254100  | -3.57221700 | 4.02850000  |
| H  | 4.73623500  | 0.55280900  | 4.77081800  |
| H  | 3.33742800  | 0.04298300  | -4.89952400 |
| H  | 2.71740100  | 4.25903400  | -4.27325700 |
| Pd | 0.54425400  | -0.92253300 | -0.34393300 |

**INT16**

|    |             |             |             |
|----|-------------|-------------|-------------|
| C  | 1.17966000  | -2.08154000 | -2.40494000 |
| C  | 1.44004000  | -1.00011000 | -1.56253000 |
| C  | 2.71109000  | -0.79133000 | -0.99107000 |
| C  | 3.58995000  | -1.91987000 | -0.99882000 |
| C  | 3.27262000  | -3.07056000 | -1.74769000 |
| C  | 2.11546000  | -3.11313000 | -2.51343000 |
| Si | 3.36514000  | 0.90124000  | -0.35365000 |
| H  | 0.22584000  | -2.17588000 | -2.91256000 |
| H  | 3.96034000  | -3.90990000 | -1.73574000 |
| H  | 1.90126000  | -3.97691000 | -3.13601000 |
| C  | 2.30726000  | 2.19420000  | -1.30687000 |
| C  | 2.72814000  | 3.52225000  | -1.50757000 |
| C  | 1.13533000  | 1.81451000  | -1.99782000 |
| C  | 2.01601000  | 4.39193000  | -2.33928000 |
| H  | 3.65163000  | 3.87444000  | -1.05775000 |
| C  | 0.37275000  | 2.70024000  | -2.77540000 |
| H  | 1.06062000  | 0.74503000  | -2.30750000 |
| C  | 0.82119000  | 3.99889000  | -2.95628000 |
| H  | 2.39795000  | 5.39516000  | -2.50893000 |
| H  | -0.51836000 | 2.33716000  | -3.28009000 |
| H  | 0.27248000  | 4.69460000  | -3.58358000 |
| C  | 4.79011000  | -1.91186000 | -0.23294000 |
| C  | 5.81739000  | -1.90433000 | 0.41822000  |
| C  | 7.04611000  | -1.79383000 | 1.13099000  |
| C  | 7.54527000  | -2.86429000 | 1.89763000  |
| C  | 7.77873000  | -0.59057000 | 1.06065000  |
| C  | 8.75100000  | -2.73011000 | 2.58194000  |
| H  | 6.98229000  | -3.79136000 | 1.94871000  |
| C  | 8.98246000  | -0.46895000 | 1.74947000  |
| H  | 7.39945000  | 0.22932000  | 0.46089000  |
| C  | 9.47157000  | -1.53421000 | 2.51111000  |
| H  | 9.13049000  | -3.56001000 | 3.17124000  |
| H  | 9.54256000  | 0.45994000  | 1.68817000  |
| H  | 10.41188000 | -1.43447000 | 3.04582000  |
| P  | -1.74378000 | 1.68214000  | 0.25569000  |
| P  | -1.45097000 | -1.72424000 | -0.32551000 |

|   |             |             |             |
|---|-------------|-------------|-------------|
| C | 1.20956000  | -5.46753000 | 0.34809000  |
| C | 0.12790000  | -5.55308000 | -0.52928000 |
| C | -0.70358000 | -4.45052000 | -0.73677000 |
| C | -0.45872000 | -3.24766000 | -0.05965000 |
| C | 0.63489000  | -3.16902000 | 0.81706000  |
| C | 1.46151000  | -4.27050000 | 1.02296000  |
| H | -1.52322000 | -4.53079000 | -1.44117000 |
| H | 0.85432000  | -2.23904000 | 1.32540000  |
| C | -1.54135000 | 6.30524000  | -0.03656000 |
| C | -2.78521000 | 5.67322000  | -0.11014000 |
| C | -2.86826000 | 4.28157000  | -0.07114000 |
| C | -1.70176000 | 3.50392000  | 0.02787000  |
| C | -0.45866000 | 4.14661000  | 0.09799000  |
| C | -0.38010000 | 5.53874000  | 0.07018000  |
| H | -3.84230000 | 3.80533000  | -0.12301000 |
| H | 0.45222000  | 3.56409000  | 0.16190000  |
| C | -2.01417000 | 1.40765000  | 4.87665000  |
| C | -2.87391000 | 2.26307000  | 4.18225000  |
| C | -2.80820000 | 2.34703000  | 2.79351000  |
| C | -1.88888000 | 1.56092000  | 2.08197000  |
| C | -1.02614000 | 0.71175000  | 2.78565000  |
| C | -1.08667000 | 0.63519000  | 4.17656000  |
| H | -3.47461000 | 3.02214000  | 2.26691000  |
| H | -0.31752000 | 0.09853000  | 2.24410000  |
| C | -4.14171000 | -2.58637000 | -3.99973000 |
| C | -4.33562000 | -3.29371000 | -2.81055000 |
| C | -3.53288000 | -3.03209000 | -1.70185000 |
| C | -2.51804000 | -2.06282000 | -1.77585000 |
| C | -2.33604000 | -1.35187000 | -2.97015000 |
| C | -3.14245000 | -1.61515000 | -4.07751000 |
| H | -3.71079000 | -3.56249000 | -0.77099000 |
| H | -1.57432000 | -0.57903000 | -3.02572000 |
| H | -6.97113000 | 1.31670000  | 3.67240000  |
| C | -3.66719000 | -0.71961000 | 1.14710000  |
| C | -2.60212000 | -1.62594000 | 1.12140000  |
| C | -2.30806000 | -2.39739000 | 2.28031000  |
| H | -1.50299000 | -3.12147000 | 2.25494000  |
| C | -3.02893000 | -2.23801000 | 3.43883000  |
| H | -2.78634000 | -2.83409000 | 4.31479000  |
| C | -4.08286000 | -1.29535000 | 3.51915000  |
| C | -4.42291000 | -0.54074000 | 2.35051000  |
| H | -5.75452000 | 0.97975000  | 1.56365000  |
| C | -5.48655000 | 0.40080000  | 2.44023000  |
| C | -6.16514000 | 0.59024000  | 3.62276000  |



|    |             |             |             |
|----|-------------|-------------|-------------|
| H  | -6.36282000 | 0.00947000  | 5.70497000  |
| C  | -5.81986000 | -0.15207000 | 4.77830000  |
| H  | -4.53077000 | -1.65288000 | 5.60505000  |
| C  | -4.80175000 | -1.07658000 | 4.72428000  |
| H  | -8.31905000 | -1.54011000 | -2.90506000 |
| C  | -4.70162000 | 1.29781000  | -2.52999000 |
| H  | -4.92891000 | 1.76159000  | -3.48651000 |
| C  | -3.63140000 | 1.73196000  | -1.79083000 |
| H  | -3.01853000 | 2.54554000  | -2.16515000 |
| C  | -3.31577000 | 1.13601000  | -0.53416000 |
| C  | -4.05986000 | 0.05316000  | -0.07605000 |
| C  | -5.21470000 | -0.38220000 | -0.81429000 |
| C  | -5.53320000 | 0.24968000  | -2.05922000 |
| H  | -6.88444000 | 0.29554000  | -3.74615000 |
| C  | -6.65913000 | -0.19240000 | -2.80131000 |
| C  | -7.45525000 | -1.21353000 | -2.33343000 |
| H  | -7.77878000 | -2.64317000 | -0.73592000 |
| C  | -7.14740000 | -1.83895000 | -1.10279000 |
| H  | -5.82900000 | -1.93633000 | 0.57051000  |
| C  | -6.05312000 | -1.44054000 | -0.36643000 |
| H  | 1.85870000  | -6.32523000 | 0.49875000  |
| H  | -1.47978000 | 7.38941000  | -0.06328000 |
| H  | -2.06832000 | 1.34609000  | 5.95965000  |
| H  | -4.77575000 | -2.78526000 | -4.85858000 |
| H  | -0.06966000 | -6.47863000 | -1.06252000 |
| H  | 2.31105000  | -4.18566000 | 1.69414000  |
| H  | -3.69360000 | 6.26325000  | -0.19233000 |
| H  | 0.59221000  | 6.01997000  | 0.12010000  |
| H  | -2.99686000 | -1.05263000 | -4.99515000 |
| H  | -5.12651000 | -4.03370000 | -2.73853000 |
| H  | -0.41477000 | -0.03274000 | 4.70783000  |
| H  | -3.60045000 | 2.86206000  | 4.72286000  |
| Pd | -0.09943000 | 0.22212000  | -0.78460000 |
| C  | 5.11540000  | 1.28123000  | -0.97170000 |
| C  | 5.69883000  | 0.56570000  | -2.03331000 |
| C  | 5.84568000  | 2.36804000  | -0.44891000 |
| C  | 6.96318000  | 0.89369000  | -2.52510000 |
| H  | 5.16878000  | -0.27151000 | -2.47704000 |
| C  | 7.11004000  | 2.70495000  | -0.93912000 |
| H  | 5.43345000  | 2.96789000  | 0.35762000  |
| C  | 7.67734000  | 1.95998000  | -1.97472000 |
| H  | 7.39259000  | 0.31186000  | -3.33601000 |
| H  | 7.65075000  | 3.54363000  | -0.50865000 |
| H  | 8.66434000  | 2.21119000  | -2.35295000 |

|   |            |             |            |
|---|------------|-------------|------------|
| C | 3.18727000 | 1.01731000  | 1.58700000 |
| C | 2.47678000 | -0.26302000 | 2.07161000 |
| C | 4.54419000 | 1.09475000  | 2.32070000 |
| C | 2.32461000 | 2.23283000  | 1.98161000 |
| H | 1.51716000 | -0.39506000 | 1.56406000 |
| H | 3.08051000 | -1.15732000 | 1.88454000 |
| H | 2.28052000 | -0.20030000 | 3.15132000 |
| H | 5.05443000 | 2.04856000  | 2.16463000 |
| H | 4.37399000 | 0.99637000  | 3.40191000 |
| H | 5.22705000 | 0.29636000  | 2.01803000 |
| H | 2.23401000 | 2.29539000  | 3.07476000 |
| H | 2.75230000 | 3.17975000  | 1.62995000 |
| H | 1.30815000 | 2.15500000  | 1.58097000 |

### TS10

|    |             |             |             |
|----|-------------|-------------|-------------|
| C  | 1.19809300  | -2.01098500 | -2.52111700 |
| C  | 1.51912300  | -0.88487200 | -1.75504500 |
| C  | 2.73828300  | -0.76352800 | -1.05978900 |
| C  | 3.56441900  | -1.92409300 | -1.00963900 |
| C  | 3.21073100  | -3.07902400 | -1.73689800 |
| C  | 2.06225500  | -3.10629400 | -2.52014300 |
| Si | 3.35857600  | 0.91450600  | -0.36454400 |
| H  | 0.26975800  | -2.05528900 | -3.07982800 |
| H  | 3.86084700  | -3.94665200 | -1.68693700 |
| H  | 1.81451600  | -3.99498100 | -3.09248900 |
| C  | 2.26598600  | 2.18368100  | -1.27914400 |
| C  | 2.72302300  | 3.48050400  | -1.58160000 |
| C  | 1.03811100  | 1.79101000  | -1.84318400 |
| C  | 1.99387400  | 4.32702400  | -2.41885100 |
| H  | 3.67713900  | 3.82317000  | -1.19182700 |
| C  | 0.31831000  | 2.61868800  | -2.71817600 |
| H  | 1.14202500  | 0.46457000  | -2.15804000 |
| C  | 0.79951300  | 3.89368800  | -3.00430600 |
| H  | 2.37183600  | 5.32198300  | -2.63783100 |
| H  | -0.60713600 | 2.26810800  | -3.16747400 |
| H  | 0.24845900  | 4.54836200  | -3.67337900 |
| C  | 4.75941100  | -1.93271000 | -0.23612500 |
| C  | 5.79486900  | -1.91297400 | 0.40133100  |
| C  | 7.02582400  | -1.79922900 | 1.10896100  |
| C  | 7.52605500  | -2.86955600 | 1.87518900  |
| C  | 7.75697100  | -0.59507600 | 1.03709500  |
| C  | 8.73143300  | -2.73406900 | 2.55935200  |
| H  | 6.96348000  | -3.79680800 | 1.92678500  |
| C  | 8.96096500  | -0.47260900 | 1.72538100  |

|   |             |             |             |
|---|-------------|-------------|-------------|
| H | 7.37635500  | 0.22456100  | 0.43782800  |
| C | 9.45061300  | -1.53732200 | 2.48755700  |
| H | 9.11179100  | -3.56315000 | 3.14914900  |
| H | 9.52049300  | 0.45653400  | 1.66381800  |
| H | 10.39079300 | -1.43643600 | 3.02225400  |
| P | -1.75847500 | 1.67391300  | 0.22709600  |
| P | -1.48188300 | -1.73203700 | -0.34235800 |
| C | 1.19015700  | -5.47171900 | 0.32510900  |
| C | 0.11047100  | -5.55868200 | -0.55512500 |
| C | -0.72264700 | -4.45756900 | -0.76336500 |
| C | -0.48156600 | -3.25303800 | -0.08687800 |
| C | 0.61178900  | -3.17282500 | 0.78989400  |
| C | 1.43907800  | -4.27398100 | 0.99944000  |
| H | -1.54456500 | -4.54046100 | -1.46499100 |
| H | 0.82629100  | -2.24354900 | 1.30194200  |
| C | -1.56439900 | 6.29894200  | -0.05988900 |
| C | -2.80642000 | 5.66350800  | -0.13298600 |
| C | -2.88533700 | 4.27124600  | -0.09803200 |
| C | -1.71619300 | 3.49658100  | 0.00027300  |
| C | -0.47499800 | 4.14330900  | 0.07491800  |
| C | -0.40104300 | 5.53551100  | 0.04655400  |
| H | -3.85821000 | 3.79298200  | -0.15203100 |
| H | 0.43790900  | 3.56508600  | 0.14092500  |
| C | -2.03579700 | 1.40341100  | 4.84836500  |
| C | -2.89321100 | 2.25756800  | 4.14961000  |
| C | -2.82309500 | 2.33892600  | 2.76086800  |
| C | -1.90145100 | 1.55049800  | 2.05350100  |
| C | -1.04250200 | 0.70162800  | 2.76115500  |
| C | -1.10725700 | 0.62875600  | 4.15219400  |
| H | -3.48779100 | 3.01340400  | 2.23159600  |
| H | -0.33357000 | 0.08604500  | 2.22287100  |
| C | -4.16360500 | -2.58984800 | -4.02571400 |
| C | -4.36102900 | -3.30014500 | -2.83892000 |
| C | -3.55989000 | -3.04268200 | -1.72823700 |
| C | -2.54417900 | -2.07486400 | -1.79571800 |
| C | -2.35958800 | -1.35986800 | -2.98797900 |
| C | -3.16338900 | -1.61910800 | -4.09840000 |
| H | -3.74031600 | -3.57499000 | -0.79883100 |
| H | -1.60202900 | -0.58252700 | -3.03965500 |
| H | -6.99434100 | 1.31424900  | 3.64905300  |
| C | -3.69187500 | -0.72905600 | 1.12618900  |
| C | -2.63579700 | -1.64495900 | 1.10032100  |
| C | -2.33974400 | -2.41132400 | 2.26075500  |
| H | -1.53692800 | -3.13828800 | 2.23490700  |

|    |             |             |             |
|----|-------------|-------------|-------------|
| C  | -3.05461000 | -2.24281900 | 3.42151400  |
| H  | -2.81119600 | -2.83460700 | 4.30020500  |
| C  | -4.10666800 | -1.29814000 | 3.49921900  |
| C  | -4.44587000 | -0.54437200 | 2.32966600  |
| H  | -5.77624400 | 0.97649800  | 1.54147900  |
| C  | -5.50838000 | 0.39820300  | 2.41861600  |
| C  | -6.18803000 | 0.58800100  | 3.60056600  |
| H  | -6.38804700 | 0.00793600  | 5.68278100  |
| C  | -5.84399800 | -0.15373300 | 4.75677700  |
| H  | -4.55540900 | -1.65404600 | 5.58497800  |
| C  | -4.82573700 | -1.07790500 | 4.70384300  |
| H  | -8.33977100 | -1.54298500 | -2.92860200 |
| C  | -4.72202600 | 1.29441800  | -2.55240700 |
| H  | -4.94991400 | 1.76001200  | -3.50787100 |
| C  | -3.64891200 | 1.72459300  | -1.81514500 |
| H  | -3.03474700 | 2.53686200  | -2.18979500 |
| C  | -3.33130500 | 1.12570000  | -0.56002100 |
| C  | -4.07906200 | 0.04562400  | -0.09855500 |
| C  | -5.23555400 | -0.38570400 | -0.83701000 |
| C  | -5.55419000 | 0.24679200  | -2.08167700 |
| H  | -6.90540700 | 0.29325100  | -3.76871200 |
| C  | -6.68030300 | -0.19487200 | -2.82393400 |
| C  | -7.47630500 | -1.21627800 | -2.35653100 |
| H  | -7.80011300 | -2.64637800 | -0.75938500 |
| C  | -7.16879600 | -1.84193500 | -1.12585900 |
| H  | -5.85039400 | -1.93966000 | 0.54741900  |
| C  | -6.07478100 | -1.44360300 | -0.38924200 |
| H  | 1.83839000  | -6.32952100 | 0.47949900  |
| H  | -1.50579200 | 7.38328300  | -0.08635200 |
| H  | -2.09294500 | 1.34404200  | 5.93130900  |
| H  | -4.79607000 | -2.78548900 | -4.88650400 |
| H  | -0.08573400 | -6.48533000 | -1.08711600 |
| H  | 2.28596900  | -4.18848400 | 1.67408500  |
| H  | -3.71673600 | 6.25075200  | -0.21362200 |
| H  | 0.57009700  | 6.01894900  | 0.09668200  |
| H  | -3.01630600 | -1.05305400 | -5.01369800 |
| H  | -5.15329600 | -4.03910400 | -2.77078500 |
| H  | -0.43767800 | -0.03893000 | 4.68664400  |
| H  | -3.62153700 | 2.85773800  | 4.68641200  |
| Pd | -0.13357500 | 0.24382200  | -0.81123200 |
| C  | 5.10152300  | 1.28948400  | -0.98920100 |
| C  | 5.67854600  | 0.56806800  | -2.05062000 |
| C  | 5.83576300  | 2.37348100  | -0.46935100 |
| C  | 6.94221000  | 0.89086900  | -2.54682600 |

|   |            |             |             |
|---|------------|-------------|-------------|
| H | 5.14394800 | -0.26763300 | -2.49164200 |
| C | 7.09914400 | 2.70525300  | -0.96386500 |
| H | 5.42586300 | 2.97612300  | 0.33642000  |
| C | 7.66028300 | 1.95648700  | -2.00005300 |
| H | 7.36797500 | 0.30693400  | -3.35814000 |
| H | 7.64391800 | 3.54330300  | -0.53744800 |
| H | 8.64658300 | 2.20470200  | -2.38204700 |
| C | 3.17146500 | 1.00415300  | 1.57032900  |
| C | 2.45570300 | -0.27497000 | 2.04712700  |
| C | 4.52556700 | 1.08427800  | 2.30682000  |
| C | 2.30736100 | 2.22163300  | 1.96082600  |
| H | 1.49974000 | -0.40313500 | 1.53133500  |
| H | 3.05919000 | -1.17034300 | 1.86358600  |
| H | 2.25051100 | -0.21510300 | 3.12533600  |
| H | 5.03550300 | 2.03770500  | 2.14647200  |
| H | 4.35417700 | 0.99087400  | 3.38828900  |
| H | 5.20954400 | 0.28508100  | 2.00866400  |
| H | 2.21384600 | 2.28379900  | 3.05374500  |
| H | 2.73736000 | 3.16765400  | 1.61005300  |
| H | 1.29337100 | 2.14429300  | 1.55518600  |

#### INT17

|    |             |             |             |
|----|-------------|-------------|-------------|
| C  | 1.32102400  | -1.78095200 | -2.92994000 |
| C  | 1.73532700  | -0.59850500 | -2.29056200 |
| C  | 2.75801200  | -0.58350700 | -1.30776200 |
| C  | 3.39565500  | -1.82818500 | -1.03724400 |
| C  | 2.97045500  | -3.00559300 | -1.68454000 |
| C  | 1.93430000  | -2.98780900 | -2.61472200 |
| Si | 3.32417300  | 1.05357600  | -0.47268600 |
| H  | 0.53960900  | -1.73955300 | -3.68194500 |
| H  | 3.47445700  | -3.93749500 | -1.45147000 |
| H  | 1.62348300  | -3.90895300 | -3.09559300 |
| C  | 2.18731600  | 2.36040700  | -1.25615800 |
| C  | 2.75725800  | 3.50240700  | -1.85900000 |
| C  | 0.80490800  | 2.15605600  | -1.43603900 |
| C  | 2.00074400  | 4.38405400  | -2.63205700 |
| H  | 3.82180400  | 3.68711000  | -1.74963200 |
| C  | 0.05842500  | 3.00207400  | -2.26221300 |
| H  | 1.37899200  | 0.34248400  | -2.70585500 |
| C  | 0.65303900  | 4.11620600  | -2.86138000 |
| H  | 2.47165600  | 5.25592000  | -3.07767800 |
| H  | -0.99471200 | 2.81404800  | -2.44174700 |
| H  | 0.05805800  | 4.77053200  | -3.49334100 |
| C  | 4.53425800  | -1.89766300 | -0.18446800 |

|   |             |             |             |
|---|-------------|-------------|-------------|
| C | 5.57374800  | -1.93119600 | 0.44611300  |
| C | 6.80963300  | -1.87721600 | 1.15124200  |
| C | 7.25320700  | -2.96578000 | 1.92684100  |
| C | 7.60554300  | -0.71508000 | 1.06544700  |
| C | 8.46612100  | -2.88973400 | 2.60661500  |
| H | 6.64095500  | -3.86038500 | 1.98884500  |
| C | 8.81633500  | -0.65204800 | 1.74949300  |
| H | 7.26882500  | 0.11915500  | 0.45951600  |
| C | 9.24923600  | -1.73467300 | 2.52089000  |
| H | 8.80252600  | -3.73230600 | 3.20393400  |
| H | 9.42523900  | 0.24465100  | 1.67760400  |
| H | 10.19502600 | -1.68000700 | 3.05239600  |
| P | -1.73285800 | 1.67907800  | 0.36067600  |
| P | -1.37311600 | -1.71466700 | -0.43822700 |
| C | 1.25355600  | -5.49197600 | 0.22876400  |
| C | 0.26074000  | -5.51935400 | -0.75227800 |
| C | -0.54402400 | -4.39996000 | -0.97542400 |
| C | -0.36233300 | -3.23509400 | -0.21584000 |
| C | 0.64718800  | -3.21369800 | 0.75951800  |
| C | 1.44514500  | -4.33409400 | 0.98603200  |
| H | -1.30207800 | -4.43794600 | -1.74933800 |
| H | 0.81110900  | -2.32111500 | 1.35025600  |
| C | -1.86430500 | 6.31282200  | 0.58117700  |
| C | -3.04670300 | 5.59643700  | 0.39017600  |
| C | -3.01374100 | 4.20622700  | 0.26987900  |
| C | -1.79005700 | 3.51724300  | 0.33133200  |
| C | -0.60755100 | 4.24542200  | 0.53403700  |
| C | -0.64694600 | 5.63280400  | 0.65714800  |
| H | -3.94437400 | 3.66672400  | 0.12878300  |
| H | 0.34668000  | 3.73749000  | 0.57385300  |
| C | -1.98408200 | 0.93030900  | 4.92968600  |
| C | -2.84525100 | 1.84456800  | 4.31798700  |
| C | -2.77371700 | 2.06558000  | 2.94474600  |
| C | -1.84585600 | 1.35546700  | 2.16424300  |
| C | -0.98423600 | 0.44472100  | 2.78449800  |
| C | -1.05084000 | 0.23393700  | 4.16094600  |
| H | -3.44180500 | 2.78643500  | 2.48684300  |
| H | -0.26967500 | -0.10738800 | 2.19089000  |
| C | -3.95729400 | -2.38223600 | -4.22903800 |
| C | -4.15978100 | -3.18492700 | -3.10341900 |
| C | -3.38608200 | -2.99404200 | -1.96012100 |
| C | -2.39205700 | -2.00252200 | -1.93389100 |
| C | -2.20062800 | -1.19678800 | -3.06622600 |
| C | -2.97862500 | -1.38704800 | -4.20854000 |

|   |             |             |             |
|---|-------------|-------------|-------------|
| H | -3.57070800 | -3.59881100 | -1.07685900 |
| H | -1.46007800 | -0.40203000 | -3.04602800 |
| H | -6.97297400 | 1.04032200  | 3.63768800  |
| C | -3.62707400 | -0.84573900 | 1.04922300  |
| C | -2.57231700 | -1.75858500 | 0.97811300  |
| C | -2.31898900 | -2.61755900 | 2.08252000  |
| H | -1.52460800 | -3.35094600 | 2.02371100  |
| C | -3.06251500 | -2.53226800 | 3.23465000  |
| H | -2.84787800 | -3.19491000 | 4.06922500  |
| C | -4.10498800 | -1.58296200 | 3.36184000  |
| C | -4.41048400 | -0.74286000 | 2.24352000  |
| H | -5.71459400 | 0.84023500  | 1.53655500  |
| C | -5.46855100 | 0.19953700  | 2.37608400  |
| C | -6.17128600 | 0.31207000  | 3.55458800  |
| H | -6.42060000 | -0.41210300 | 5.58576100  |
| C | -5.85818300 | -0.51304900 | 4.66214100  |
| H | -4.60249900 | -2.08370400 | 5.40647400  |
| C | -4.84793100 | -1.44236600 | 4.56392200  |
| H | -8.17463500 | -1.47985000 | -3.13302000 |
| C | -4.65022500 | 1.42453800  | -2.48393100 |
| H | -4.88438300 | 1.96382200  | -3.39809000 |
| C | -3.60122200 | 1.82705800  | -1.69909600 |
| H | -3.02611700 | 2.69758000  | -1.99208100 |
| C | -3.27240100 | 1.13488500  | -0.49451400 |
| C | -3.99748400 | 0.00421700  | -0.12747000 |
| C | -5.13099700 | -0.40059300 | -0.91562500 |
| C | -5.45194800 | 0.31507400  | -2.11323100 |
| H | -6.78176800 | 0.45258300  | -3.81222800 |
| C | -6.55500600 | -0.09934900 | -2.90375000 |
| C | -7.32806700 | -1.17389800 | -2.52534600 |
| H | -7.63337900 | -2.72726600 | -1.04401400 |
| C | -7.01969400 | -1.88131100 | -1.34002800 |
| H | -5.72049100 | -2.06926900 | 0.34050200  |
| C | -5.94674500 | -1.51056600 | -0.55955300 |
| H | 1.87637900  | -6.36539700 | 0.39953700  |
| H | -1.89164600 | 7.39489800  | 0.67122100  |
| H | -2.04164800 | 0.76336900  | 6.00125000  |
| H | -4.56914400 | -2.52585300 | -5.11469900 |
| H | 0.10834200  | -6.41467000 | -1.34852600 |
| H | 2.22375000  | -4.29431700 | 1.74229000  |
| H | -3.99906200 | 6.11587900  | 0.33537900  |
| H | 0.27862200  | 6.18146700  | 0.80384000  |
| H | -2.82802900 | -0.75006200 | -5.07544300 |
| H | -4.93484500 | -3.94509700 | -3.10815700 |

|    |             |             |             |
|----|-------------|-------------|-------------|
| H  | -0.37759300 | -0.47971600 | 4.62672000  |
| H  | -3.57810000 | 2.38455000  | 4.90948500  |
| Pd | -0.10774200 | 0.43190900  | -0.76577400 |
| C  | 5.09684500  | 1.41670700  | -1.01363400 |
| C  | 5.74657200  | 0.62444100  | -1.97762300 |
| C  | 5.81305500  | 2.50679000  | -0.48083000 |
| C  | 7.05873500  | 0.89023300  | -2.37340100 |
| H  | 5.23025100  | -0.22219400 | -2.41986800 |
| C  | 7.12518600  | 2.77971700  | -0.87232800 |
| H  | 5.34487500  | 3.16219000  | 0.24953600  |
| C  | 7.75454800  | 1.96499800  | -1.81652100 |
| H  | 7.53895800  | 0.25457700  | -3.11222700 |
| H  | 7.65427200  | 3.62513800  | -0.44079500 |
| H  | 8.77768300  | 2.16983500  | -2.11935300 |
| C  | 3.13285500  | 1.00915800  | 1.47188700  |
| C  | 2.42067300  | -0.28639700 | 1.90242500  |
| C  | 4.48317900  | 1.07849600  | 2.21485300  |
| C  | 2.26430900  | 2.20277700  | 1.92322200  |
| H  | 1.49489400  | -0.42750100 | 1.33585000  |
| H  | 3.04604900  | -1.16920900 | 1.74624500  |
| H  | 2.15845600  | -0.23875000 | 2.96905400  |
| H  | 4.98878700  | 2.03771400  | 2.07477900  |
| H  | 4.30866800  | 0.96031900  | 3.29366300  |
| H  | 5.17093400  | 0.29045800  | 1.90277400  |
| H  | 2.19642300  | 2.22433000  | 3.01969800  |
| H  | 2.67269600  | 3.16608500  | 1.59482800  |
| H  | 1.24477500  | 2.12131800  | 1.53715100  |

**INT18**

|   |            |             |             |
|---|------------|-------------|-------------|
| C | 2.20487000 | 2.53570700  | 1.03110800  |
| C | 2.08977400 | 1.45453700  | 1.60738400  |
| C | 2.21974100 | 0.28933300  | 2.43506400  |
| C | 2.08075800 | 0.84076900  | -1.38676900 |
| C | 2.84353300 | -0.87568100 | 1.91587900  |
| C | 3.26545500 | 0.10529100  | -1.19400200 |
| C | 2.84430600 | 1.61981100  | -3.56187600 |
| H | 2.67651100 | 2.21733900  | -4.45411900 |
| C | 3.97940600 | 0.82067700  | -3.44278500 |
| H | 4.70726000 | 0.76867500  | -4.24760000 |
| C | 4.17462300 | 0.07957100  | -2.27918400 |
| H | 5.05542800 | -0.55070900 | -2.22445900 |
| C | 1.89322100 | 1.61160100  | -2.54105100 |
| H | 0.98624600 | 2.19362400  | -2.67314900 |
| C | 1.81544400 | -0.78680100 | 4.56834900  |



|    |             |             |             |
|----|-------------|-------------|-------------|
| H  | 1.42781100  | -0.74944000 | 5.58200800  |
| C  | 2.40284400  | -1.95305300 | 4.07701300  |
| H  | 2.47356100  | -2.83556300 | 4.70622900  |
| C  | 2.91213600  | -1.98582900 | 2.77652700  |
| H  | 3.38037200  | -2.90082100 | 2.42710800  |
| C  | 1.72179000  | 0.33366800  | 3.74972300  |
| H  | 1.26632700  | 1.24693800  | 4.11325500  |
| Si | 3.85147900  | -0.94074900 | 0.29481200  |
| C  | 5.63692600  | -0.41371300 | 0.87109600  |
| C  | 3.74754000  | -2.73917900 | -0.30110900 |
| C  | 4.77502200  | -3.35327500 | -1.04010600 |
| C  | 2.55573800  | -3.47176300 | -0.12643900 |
| C  | 4.62112500  | -4.63148900 | -1.58363800 |
| H  | 5.71574200  | -2.83465300 | -1.19856500 |
| C  | 2.39078300  | -4.74611400 | -0.67067600 |
| H  | 1.73183900  | -3.03906000 | 0.43605600  |
| C  | 3.42570600  | -5.33089000 | -1.40403000 |
| H  | 5.43545100  | -5.08107400 | -2.14545800 |
| H  | 1.45591900  | -5.28080000 | -0.52107300 |
| H  | 3.30401100  | -6.32375400 | -1.82796200 |
| Pd | 0.55307200  | 0.78048800  | -0.02941300 |
| P  | -1.33754100 | 0.67579300  | 1.60156400  |
| P  | -0.78297900 | -0.20757100 | -1.71031600 |
| C  | 1.62751000  | -2.18421000 | -5.15688600 |
| C  | 0.57372200  | -1.32505900 | -5.47165600 |
| C  | -0.17604600 | -0.72014700 | -4.46044500 |
| C  | 0.12418300  | -0.97575600 | -3.11471500 |
| C  | 1.20305300  | -1.81966600 | -2.81094600 |
| C  | 1.94363600  | -2.43028200 | -3.81894700 |
| H  | -0.97284200 | -0.03946200 | -4.73324000 |
| H  | 1.48729200  | -1.98782300 | -1.78189300 |
| C  | -0.91054800 | 3.97995300  | 4.84164500  |
| C  | -0.70232500 | 4.25824700  | 3.48837000  |
| C  | -0.82605500 | 3.24439100  | 2.53886000  |
| C  | -1.19719700 | 1.94471000  | 2.92371800  |
| C  | -1.40466300 | 1.67493400  | 4.28426200  |
| C  | -1.25470100 | 2.68606400  | 5.23589900  |
| H  | -0.63839500 | 3.46120700  | 1.49052400  |
| H  | -1.66221600 | 0.67379200  | 4.60976700  |
| C  | -1.81377500 | -3.43153200 | 3.68210400  |
| C  | -0.70442300 | -3.16456300 | 2.87861100  |
| C  | -0.56863000 | -1.91843800 | 2.26887100  |
| C  | -1.54145300 | -0.92876000 | 2.45410300  |
| C  | -2.66034300 | -1.20593700 | 3.25683600  |

|   |             |             |             |
|---|-------------|-------------|-------------|
| C | -2.78935100 | -2.44902000 | 3.87332600  |
| H | 0.29449700  | -1.71188100 | 1.64760500  |
| H | -3.44225800 | -0.46129400 | 3.37604600  |
| C | -3.54988900 | 2.95702400  | -3.65297800 |
| C | -3.70876300 | 1.60612800  | -3.96951300 |
| C | -2.89080600 | 0.64800900  | -3.37399200 |
| C | -1.89471300 | 1.03496400  | -2.46217400 |
| C | -1.74590000 | 2.39283700  | -2.14484000 |
| C | -2.57103200 | 3.34858400  | -2.73755600 |
| H | -3.04375500 | -0.40290600 | -3.59916600 |
| H | -0.99522000 | 2.69773100  | -1.42026600 |
| H | -6.43892100 | -3.06825900 | 2.29527400  |
| C | -2.98802100 | -1.29172200 | -0.24735300 |
| C | -1.83837000 | -1.55250700 | -0.99759500 |
| C | -1.35769200 | -2.88916000 | -1.10739200 |
| H | -0.47877700 | -3.10168900 | -1.70112600 |
| C | -1.99854300 | -3.92906700 | -0.48372800 |
| H | -1.61179500 | -4.94055900 | -0.58056500 |
| C | -3.17543600 | -3.71163800 | 0.27302200  |
| C | -3.69029700 | -2.38012100 | 0.37855600  |
| H | -5.29138300 | -1.18591900 | 1.22939600  |
| C | -4.88441600 | -2.18464400 | 1.12913900  |
| C | -5.52678300 | -3.24300700 | 1.73187000  |
| H | -5.52221400 | -5.37991200 | 2.11401300  |
| C | -5.00708800 | -4.55503700 | 1.63040100  |
| H | -3.44333900 | -5.78388400 | 0.82846000  |
| C | -3.85222700 | -4.78064100 | 0.91688900  |
| H | -7.90019900 | 1.49192100  | -2.85611300 |
| C | -4.69588000 | 2.64823100  | 0.25437100  |
| H | -5.13551400 | 3.63344400  | 0.38795900  |
| C | -3.57634200 | 2.29352600  | 0.96530200  |
| H | -3.15084900 | 3.00464600  | 1.66218300  |
| C | -2.97572600 | 1.01453500  | 0.80339900  |
| C | -3.54991700 | 0.08863300  | -0.06929200 |
| C | -4.73708400 | 0.43512500  | -0.79848600 |
| C | -5.29887700 | 1.74382800  | -0.65281100 |
| H | -6.85267500 | 3.10425200  | -1.29449900 |
| C | -6.44244100 | 2.10472300  | -1.41368600 |
| C | -7.02394900 | 1.20803600  | -2.28059300 |
| H | -6.94746600 | -0.79949200 | -3.09863500 |
| C | -6.48185700 | -0.09245600 | -2.41791700 |
| H | -4.96293700 | -1.46551700 | -1.82281000 |
| C | -5.36946200 | -0.46864900 | -1.69871800 |
| H | 2.20706500  | -2.64848800 | -5.94974500 |

|   |             |             |             |
|---|-------------|-------------|-------------|
| H | -0.80263100 | 4.76653400  | 5.58265100  |
| H | -1.92533300 | -4.40399900 | 4.15266400  |
| H | -4.19531900 | 3.70067300  | -4.11101500 |
| H | 0.33222700  | -1.11610400 | -6.50999100 |
| H | 2.77191200  | -3.07827200 | -3.54819700 |
| H | -0.43931400 | 5.26538100  | 3.17690500  |
| H | -1.41181200 | 2.46033700  | 6.28678400  |
| H | -2.45281300 | 4.39661400  | -2.47811900 |
| H | -4.48637400 | 1.29405600  | -4.65926600 |
| H | -3.66391900 | -2.66039600 | 4.48080300  |
| H | 0.05766800  | -3.92246900 | 2.72235100  |
| C | 2.50445300  | 3.75991100  | 0.36805000  |
| C | 1.89119900  | 4.96422000  | 0.76658600  |
| C | 3.45731000  | 3.77548700  | -0.67339400 |
| C | 2.21215700  | 6.15648400  | 0.12455700  |
| H | 1.18894300  | 4.95364400  | 1.59112900  |
| C | 3.76976400  | 4.97430400  | -1.30669700 |
| H | 3.93355200  | 2.85079200  | -0.97650900 |
| C | 3.14677500  | 6.16336100  | -0.91569000 |
| H | 1.73999400  | 7.08257500  | 0.43909700  |
| H | 4.50222900  | 4.98011900  | -2.10829400 |
| H | 3.39521800  | 7.09563600  | -1.41459700 |
| C | 6.67380500  | -0.20343900 | -0.25396400 |
| H | 6.40293500  | 0.62498500  | -0.91506200 |
| H | 7.64486900  | 0.04445000  | 0.19610200  |
| H | 6.83092800  | -1.09628400 | -0.86948400 |
| C | 6.18090800  | -1.49954300 | 1.82836400  |
| H | 7.17345800  | -1.20526400 | 2.19605300  |
| H | 5.53983500  | -1.63669900 | 2.70510000  |
| H | 6.28693600  | -2.47057900 | 1.33103800  |
| C | 5.53032800  | 0.92394800  | 1.64219600  |
| H | 5.12333100  | 1.72737900  | 1.01633100  |
| H | 4.90406600  | 0.84102700  | 2.53580600  |
| H | 6.52946200  | 1.23973200  | 1.97225200  |

**TS12**

|   |            |             |             |
|---|------------|-------------|-------------|
| C | 2.47224700 | 2.04878800  | 0.03081500  |
| C | 2.09238300 | 1.47854800  | 1.10838500  |
| C | 2.32987700 | 0.63472000  | 2.24828400  |
| C | 2.16392200 | 0.74501800  | -1.48506400 |
| C | 2.94688900 | -0.61884400 | 1.97742200  |
| C | 3.13437800 | -0.26734600 | -1.30288900 |
| C | 2.53759200 | 0.78360400  | -3.88287900 |
| H | 2.30681700 | 1.18589800  | -4.86515000 |

|    |             |             |             |
|----|-------------|-------------|-------------|
| C  | 3.46188700  | -0.25463800 | -3.73938400 |
| H  | 3.95745000  | -0.66990400 | -4.61181600 |
| C  | 3.74250700  | -0.76808100 | -2.47379300 |
| H  | 4.45105600  | -1.58743900 | -2.40013700 |
| C  | 1.89046800  | 1.28090700  | -2.75664500 |
| H  | 1.15892800  | 2.07603100  | -2.86137400 |
| C  | 2.08810900  | 0.07553900  | 4.58979500  |
| H  | 1.77093700  | 0.34655500  | 5.59247000  |
| C  | 2.64673300  | -1.17944100 | 4.34181000  |
| H  | 2.75711400  | -1.89687900 | 5.14978500  |
| C  | 3.07967500  | -1.51026600 | 3.05401300  |
| H  | 3.52463600  | -2.48696900 | 2.88553800  |
| C  | 1.92543900  | 0.98314800  | 3.54639800  |
| H  | 1.48936800  | 1.95762200  | 3.72542700  |
| Si | 3.78499400  | -1.06292200 | 0.32210500  |
| C  | 5.64732600  | -0.58588700 | 0.56515500  |
| C  | 3.48356100  | -2.91831700 | 0.08035600  |
| C  | 4.39613900  | -3.77760000 | -0.55797600 |
| C  | 2.23845600  | -3.46335700 | 0.45358900  |
| C  | 4.07863000  | -5.11299700 | -0.82199200 |
| H  | 5.37435100  | -3.41081900 | -0.85410000 |
| C  | 1.90978500  | -4.79285000 | 0.18707400  |
| H  | 1.50218800  | -2.83813700 | 0.95100600  |
| C  | 2.83148200  | -5.62333400 | -0.45506600 |
| H  | 4.80623900  | -5.75422300 | -1.31216300 |
| H  | 0.93590100  | -5.17673000 | 0.48052100  |
| H  | 2.58283300  | -6.66028600 | -0.66299600 |
| Pd | 0.50955100  | 0.70223900  | -0.15000900 |
| P  | -1.25912300 | 0.91835800  | 1.51234900  |
| P  | -0.99816000 | -0.38517100 | -1.70819400 |
| C  | 1.23720600  | -3.08306100 | -4.75891200 |
| C  | 0.28054800  | -2.18027600 | -5.22918900 |
| C  | -0.41029700 | -1.35304700 | -4.34196200 |
| C  | -0.14220700 | -1.41620200 | -2.96582100 |
| C  | 0.85099200  | -2.29683500 | -2.51074100 |
| C  | 1.52273000  | -3.13990800 | -3.39388300 |
| H  | -1.14628200 | -0.65831700 | -4.72935300 |
| H  | 1.11165000  | -2.32616500 | -1.46071300 |
| C  | -0.29154100 | 4.57015600  | 4.21714600  |
| C  | -0.02348300 | 4.59656700  | 2.84592700  |
| C  | -0.33088900 | 3.49087800  | 2.05263100  |
| C  | -0.93302400 | 2.35174500  | 2.61586300  |
| C  | -1.20544100 | 2.33777700  | 3.99128100  |
| C  | -0.88223200 | 3.43966800  | 4.78571400  |

|   |             |             |             |
|---|-------------|-------------|-------------|
| H | -0.09766300 | 3.50955800  | 0.99195500  |
| H | -1.64546700 | 1.46076300  | 4.45227900  |
| C | -1.84235300 | -2.76248300 | 4.25035900  |
| C | -0.70481100 | -2.63636000 | 3.45074300  |
| C | -0.54813200 | -1.51586000 | 2.63644000  |
| C | -1.52639500 | -0.51298500 | 2.61326400  |
| C | -2.66568800 | -0.64324700 | 3.42273000  |
| C | -2.81898700 | -1.76291900 | 4.23881300  |
| H | 0.33913900  | -1.41164800 | 2.02317200  |
| H | -3.44509100 | 0.11236400  | 3.39080200  |
| C | -3.65996900 | 2.57382700  | -4.07101400 |
| C | -3.89394300 | 1.20103600  | -4.18116000 |
| C | -3.10418600 | 0.29815000  | -3.47163600 |
| C | -2.06521100 | 0.76197500  | -2.64873200 |
| C | -1.83863000 | 2.14196400  | -2.54138400 |
| C | -2.63293300 | 3.04350200  | -3.24986300 |
| H | -3.30951500 | -0.76615500 | -3.53850500 |
| H | -1.05706000 | 2.50785600  | -1.88081900 |
| H | -6.60464200 | -2.17875500 | 2.92120800  |
| C | -3.18031700 | -1.09247500 | -0.01552900 |
| C | -2.11265600 | -1.55400000 | -0.78889500 |
| C | -1.75951100 | -2.93287700 | -0.73776200 |
| H | -0.95048100 | -3.30743300 | -1.35042300 |
| C | -2.43304600 | -3.81202600 | 0.07251800  |
| H | -2.13895600 | -4.85850700 | 0.09950100  |
| C | -3.52990800 | -3.38564300 | 0.86012300  |
| C | -3.93105700 | -2.01346400 | 0.79336400  |
| H | -5.38668500 | -0.57745700 | 1.52349900  |
| C | -5.06068100 | -1.60996800 | 1.56069500  |
| C | -5.74239500 | -2.50975800 | 2.34927000  |
| H | -5.87178900 | -4.55840200 | 3.05627700  |
| C | -5.32807700 | -3.86075900 | 2.42591400  |
| H | -3.91822600 | -5.32295000 | 1.73865600  |
| C | -4.24222000 | -4.28623300 | 1.69541200  |
| H | -7.94084800 | 1.83190200  | -2.75082100 |
| C | -4.43592300 | 3.04363000  | -0.00626600 |
| H | -4.75512900 | 4.08279300  | -0.00332900 |
| C | -3.32688600 | 2.66426700  | 0.70844700  |
| H | -2.78675500 | 3.41171900  | 1.27633600  |
| C | -2.88312200 | 1.31188100  | 0.71631800  |
| C | -3.59495100 | 0.34866200  | -0.00108700 |
| C | -4.77668600 | 0.72463000  | -0.72393500 |
| C | -5.18708800 | 2.09600600  | -0.74349300 |
| H | -6.62844900 | 3.51959500  | -1.50049900 |

|              |             |             |             |
|--------------|-------------|-------------|-------------|
| C            | -6.33357300 | 2.47339400  | -1.49172000 |
| C            | -7.06225300 | 1.53460100  | -2.18568300 |
| H            | -7.24978400 | -0.56307900 | -2.70466900 |
| C            | -6.66885800 | 0.17510800  | -2.15908800 |
| H            | -5.26205000 | -1.26242200 | -1.44880200 |
| C            | -5.55526100 | -0.21915500 | -1.45175900 |
| H            | 1.76299200  | -3.73070400 | -5.45492100 |
| H            | -0.04104300 | 5.42540900  | 4.83797100  |
| H            | -1.97223700 | -3.63842600 | 4.87934600  |
| H            | -4.28431200 | 3.27533200  | -4.61648500 |
| H            | 0.06431800  | -2.12059400 | -6.29223100 |
| H            | 2.27768800  | -3.81856500 | -3.00754800 |
| H            | 0.43012500  | 5.47489600  | 2.39502200  |
| H            | -1.09150900 | 3.41242500  | 5.85128100  |
| H            | -2.45698500 | 4.11081500  | -3.15118700 |
| H            | -4.70629800 | 0.83412400  | -4.80065700 |
| H            | -3.71273100 | -1.86709100 | 4.84595900  |
| H            | 0.06223900  | -3.40552100 | 3.45695600  |
| C            | 3.13903600  | 3.25095800  | -0.43999200 |
| C            | 2.94833200  | 4.43225700  | 0.30429300  |
| C            | 4.01836400  | 3.26326200  | -1.53727800 |
| C            | 3.61426900  | 5.60206800  | -0.05152700 |
| H            | 2.28323400  | 4.40965100  | 1.16110100  |
| C            | 4.68732700  | 4.43575100  | -1.87987900 |
| H            | 4.19135600  | 2.35492000  | -2.10107900 |
| C            | 4.48279700  | 5.60800100  | -1.14633700 |
| H            | 3.45876700  | 6.50807300  | 0.52718200  |
| H            | 5.37438500  | 4.43340300  | -2.72094600 |
| H            | 5.00239100  | 6.52053600  | -1.42371400 |
| C            | 6.49408900  | -0.67916000 | -0.72184900 |
| H            | 6.12719300  | -0.00858900 | -1.50537100 |
| H            | 7.52896200  | -0.38677700 | -0.49728400 |
| H            | 6.53411300  | -1.69276700 | -1.13622200 |
| C            | 6.26640500  | -1.50966600 | 1.63816500  |
| H            | 7.31777500  | -1.23546000 | 1.80080700  |
| H            | 5.75512200  | -1.41670200 | 2.60220500  |
| H            | 6.24192200  | -2.56470900 | 1.34241800  |
| C            | 5.71747900  | 0.87608500  | 1.06552000  |
| H            | 5.31891800  | 1.58221300  | 0.32878300  |
| H            | 5.17167000  | 1.02049600  | 2.00394000  |
| H            | 6.76477200  | 1.15325800  | 1.24864000  |
| <b>INT19</b> |             |             |             |
| C            | 2.93169300  | 1.19881800  | -1.25045600 |

|    |             |             |             |
|----|-------------|-------------|-------------|
| C  | 2.23447400  | 1.31145700  | -0.10061500 |
| C  | 2.67183500  | 1.51678100  | 1.27540500  |
| C  | 2.55448500  | -0.09749100 | -1.90928700 |
| C  | 3.19320300  | 0.30955000  | 1.82484900  |
| C  | 2.65942400  | -1.24695400 | -1.04538200 |
| C  | 1.95133900  | -1.50771900 | -3.79082400 |
| H  | 1.67440500  | -1.61538100 | -4.83571200 |
| C  | 2.06136500  | -2.64221600 | -2.97393600 |
| H  | 1.86408800  | -3.62860500 | -3.38168700 |
| C  | 2.40031000  | -2.50946600 | -1.63324600 |
| H  | 2.47228900  | -3.40389400 | -1.02574900 |
| C  | 2.19647100  | -0.24538000 | -3.26421700 |
| H  | 2.12741200  | 0.64107200  | -3.88831600 |
| C  | 2.91198000  | 2.63324400  | 3.40565000  |
| H  | 2.81616500  | 3.52899700  | 4.01273300  |
| C  | 3.38215300  | 1.44852200  | 3.97544300  |
| H  | 3.64421000  | 1.41720600  | 5.02923000  |
| C  | 3.52491000  | 0.30086900  | 3.18748700  |
| H  | 3.88505500  | -0.61348800 | 3.65135100  |
| C  | 2.54729000  | 2.66935600  | 2.05924700  |
| H  | 2.16198500  | 3.58185000  | 1.62124100  |
| Si | 3.44670400  | -1.25266700 | 0.74379200  |
| C  | 5.34249300  | -1.56808600 | 0.55651300  |
| C  | 2.56505000  | -2.65153100 | 1.67658200  |
| C  | 2.96450300  | -4.00010500 | 1.62741100  |
| C  | 1.42329500  | -2.34989200 | 2.44438600  |
| C  | 2.26195200  | -4.99536400 | 2.31242800  |
| H  | 3.83912700  | -4.28978600 | 1.05338800  |
| C  | 0.71086600  | -3.33711300 | 3.12741500  |
| H  | 1.07213800  | -1.32790800 | 2.50615400  |
| C  | 1.12998000  | -4.66776100 | 3.06260700  |
| H  | 2.60177500  | -6.02658800 | 2.26241300  |
| H  | -0.17106500 | -3.06298400 | 3.69978300  |
| H  | 0.58423400  | -5.44225700 | 3.59435200  |
| Pd | 0.59518200  | 0.07771000  | -0.39570100 |
| P  | -0.85797100 | 1.73367400  | 0.47583800  |
| P  | -1.26219600 | -1.45339500 | -0.99128500 |
| C  | -0.10736700 | -5.88152900 | -1.90022600 |
| C  | -0.84329300 | -5.14988000 | -2.83278500 |
| C  | -1.22094300 | -3.83318300 | -2.56013800 |
| C  | -0.86358400 | -3.22224200 | -1.34683700 |
| C  | -0.09260200 | -3.95821800 | -0.43082800 |
| C  | 0.26578500  | -5.27940400 | -0.69699700 |
| H  | -1.78525900 | -3.28879800 | -3.30657200 |

|   |             |             |             |
|---|-------------|-------------|-------------|
| H | 0.26151000  | -3.49828300 | 0.48271400  |
| C | 0.93980900  | 5.97757700  | -0.11022800 |
| C | 1.10302500  | 4.99462300  | -1.09021700 |
| C | 0.54739600  | 3.72846100  | -0.90684200 |
| C | -0.18276900 | 3.43119200  | 0.25660500  |
| C | -0.35419900 | 4.42770400  | 1.22835200  |
| C | 0.20595900  | 5.69345100  | 1.04347900  |
| H | 0.69181900  | 2.96581800  | -1.66368000 |
| H | -0.90212200 | 4.21616000  | 2.13972100  |
| C | -1.66383900 | 1.41846500  | 5.02200500  |
| C | -0.50992700 | 0.86034900  | 4.46743800  |
| C | -0.28027400 | 0.95338000  | 3.09573800  |
| C | -1.20624200 | 1.59820700  | 2.26472600  |
| C | -2.35107800 | 2.17851300  | 2.83062500  |
| C | -2.57844700 | 2.08455100  | 4.20316500  |
| H | 0.63025100  | 0.54751100  | 2.67603700  |
| H | -3.07375000 | 2.68294500  | 2.19800300  |
| C | -3.50921800 | -0.12759900 | -4.81870200 |
| C | -4.07333900 | -1.10544700 | -3.99493500 |
| C | -3.41841400 | -1.49866500 | -2.83008800 |
| C | -2.18748400 | -0.92050000 | -2.47854600 |
| C | -1.62672000 | 0.05704200  | -3.31179900 |
| C | -2.28700300 | 0.45312100  | -4.47617000 |
| H | -3.86783300 | -2.24792000 | -2.18529700 |
| H | -0.67777800 | 0.51187800  | -3.04303000 |
| H | -6.47727300 | 1.49228500  | 3.51559300  |
| C | -3.29703500 | -0.36866500 | 0.69028100  |
| C | -2.45583600 | -1.45471200 | 0.43409800  |
| C | -2.37350000 | -2.51137900 | 1.38438100  |
| H | -1.74756200 | -3.36998300 | 1.18585800  |
| C | -3.08213300 | -2.47338000 | 2.55886500  |
| H | -2.99383400 | -3.28958300 | 3.27181100  |
| C | -3.95694500 | -1.39832100 | 2.84835500  |
| C | -4.09739700 | -0.34866900 | 1.88544200  |
| H | -5.17631400 | 1.48363400  | 1.44282000  |
| C | -5.03497700 | 0.68709600  | 2.16345800  |
| C | -5.76491700 | 0.69314100  | 3.33081800  |
| H | -6.17281600 | -0.30993000 | 5.21311200  |
| C | -5.59548100 | -0.33066100 | 4.29343900  |
| H | -4.58049900 | -2.15660900 | 4.77519300  |
| C | -4.70949400 | -1.35518600 | 4.05222400  |
| H | -7.81169900 | 0.94100600  | -3.36881700 |
| C | -3.81703800 | 2.87833100  | -2.12262200 |
| H | -3.95259200 | 3.69051900  | -2.83213900 |



|   |             |             |             |
|---|-------------|-------------|-------------|
| C | -2.69576000 | 2.83734800  | -1.33378000 |
| H | -1.96273500 | 3.62805900  | -1.42633600 |
| C | -2.48602900 | 1.78101800  | -0.40144400 |
| C | -3.44556300 | 0.77339400  | -0.27173100 |
| C | -4.63762000 | 0.82187700  | -1.07243200 |
| C | -4.81203200 | 1.87657600  | -2.02447100 |
| H | -6.08095300 | 2.70214300  | -3.56836900 |
| C | -5.96833600 | 1.89581700  | -2.84829100 |
| C | -6.92893500 | 0.91699400  | -2.73653000 |
| H | -7.52958400 | -0.89319300 | -1.70340700 |
| C | -6.76776100 | -0.12382900 | -1.79078300 |
| H | -5.54345400 | -0.98183000 | -0.27193300 |
| C | -5.65379900 | -0.17207900 | -0.98305800 |
| H | 0.17940100  | -6.90774000 | -2.11159800 |
| H | 1.38265800  | 6.96006300  | -0.24590900 |
| H | -1.84907000 | 1.33948000  | 6.08936800  |
| H | -4.02560300 | 0.18377600  | -5.72209200 |
| H | -1.13060700 | -5.60130600 | -3.77832200 |
| H | 0.85304400  | -5.82346400 | 0.03533200  |
| H | 1.67716200  | 5.20383900  | -1.98770700 |
| H | 0.07311100  | 6.45477900  | 1.80672800  |
| H | -1.84917700 | 1.21841300  | -5.11089800 |
| H | -5.03227400 | -1.54637600 | -4.24836300 |
| H | -3.48082800 | 2.51384500  | 4.62677600  |
| H | 0.21782500  | 0.35687600  | 5.09698300  |
| C | 4.03929700  | 2.03890500  | -1.72377600 |
| C | 4.26134600  | 3.30725200  | -1.15190100 |
| C | 4.88825000  | 1.61582900  | -2.76462300 |
| C | 5.31524800  | 4.10701600  | -1.58412100 |
| H | 3.59368800  | 3.66443800  | -0.37645800 |
| C | 5.93686500  | 2.42385000  | -3.20088300 |
| H | 4.73981900  | 0.64144800  | -3.21999100 |
| C | 6.15810900  | 3.67025500  | -2.61077700 |
| H | 5.47453200  | 5.07924300  | -1.12582600 |
| H | 6.58543500  | 2.07640600  | -4.00012700 |
| H | 6.97539700  | 4.29898800  | -2.95192900 |
| C | 5.64230500  | -2.60931100 | -0.54357300 |
| H | 5.27249200  | -2.28678200 | -1.52313200 |
| H | 6.72813300  | -2.75148100 | -0.63078200 |
| H | 5.20679100  | -3.59278400 | -0.33342400 |
| C | 5.92985800  | -2.05524700 | 1.90050500  |
| H | 7.00619100  | -2.24287500 | 1.78432000  |
| H | 5.82056000  | -1.30053400 | 2.68691300  |
| H | 5.46896700  | -2.98273900 | 2.25541700  |

|   |            |             |             |
|---|------------|-------------|-------------|
| C | 6.04346200 | -0.24668200 | 0.17181200  |
| H | 5.72826500 | 0.11710900  | -0.80954100 |
| H | 5.85431700 | 0.55008400  | 0.89950700  |
| H | 7.12999400 | -0.40467800 | 0.12636200  |

**TS11**

|    |             |             |             |
|----|-------------|-------------|-------------|
| C  | 3.29534800  | -1.12697600 | -1.33850800 |
| C  | 3.93052200  | -1.87379900 | -2.35458700 |
| C  | 2.19715800  | -0.34787000 | -1.73157200 |
| C  | 3.51516500  | -1.83723700 | -3.68424400 |
| H  | 4.77204300  | -2.50569900 | -2.10601800 |
| C  | 1.82086200  | -0.23696900 | -3.07597000 |
| C  | 2.46555000  | -0.99688800 | -4.05419600 |
| H  | 4.02721400  | -2.43943700 | -4.42937600 |
| H  | 1.01394500  | 0.42617300  | -3.37337500 |
| H  | 2.14768500  | -0.92683600 | -5.09099200 |
| C  | 4.80448400  | 0.89782000  | 0.07305900  |
| C  | 3.98272400  | 1.88352500  | -0.52643300 |
| C  | 6.12585300  | 1.27468800  | 0.36448400  |
| C  | 4.51197500  | 3.13584600  | -0.90386300 |
| C  | 6.64491800  | 2.52444200  | 0.02266800  |
| C  | 5.84008500  | 3.45114500  | -0.63861100 |
| H  | 3.86116300  | 3.86718400  | -1.37268200 |
| H  | 7.67591200  | 2.76610500  | 0.26457600  |
| H  | 6.23458800  | 4.41976300  | -0.93145900 |
| H  | 6.77871700  | 0.57907000  | 0.87623200  |
| Pd | 0.62034200  | 0.52077700  | -0.61972700 |
| Si | 4.16569300  | -0.87572900 | 0.33346100  |
| C  | 2.53488600  | 1.82669700  | -0.63468800 |
| C  | 1.49692300  | 2.53316300  | -0.53951600 |
| C  | 1.01201000  | 3.88258900  | -0.32753200 |
| C  | 1.04413300  | 4.79903300  | -1.39355700 |
| C  | 0.61252000  | 4.32079300  | 0.94530900  |
| C  | 0.67989700  | 6.12670600  | -1.18500400 |
| H  | 1.34203500  | 4.45804200  | -2.37939300 |
| C  | 0.24893100  | 5.65093500  | 1.14528300  |
| H  | 0.59775100  | 3.62356100  | 1.77284800  |
| C  | 0.27950900  | 6.55703300  | 0.08282400  |
| H  | 0.70291800  | 6.82482400  | -2.01650000 |
| H  | -0.05355000 | 5.97900000  | 2.13565100  |
| H  | -0.00555900 | 7.59307400  | 0.24113900  |
| C  | 3.08260000  | -0.83369200 | 1.89917500  |
| C  | 2.78888600  | -1.99560300 | 2.64042600  |
| C  | 2.74981600  | 0.40067000  | 2.49341700  |

|   |             |             |             |
|---|-------------|-------------|-------------|
| C | 2.24457300  | -1.93052100 | 3.92556600  |
| H | 2.99083000  | -2.97404000 | 2.22210000  |
| C | 2.17633500  | 0.47287300  | 3.76544300  |
| H | 2.96840200  | 1.32760100  | 1.97439100  |
| C | 1.94028000  | -0.69255500 | 4.49600600  |
| H | 2.05447900  | -2.84802900 | 4.47634200  |
| H | 1.94730100  | 1.44422800  | 4.19670800  |
| H | 1.52903700  | -0.63725600 | 5.50044100  |
| C | 5.61682800  | -2.14271600 | 0.61771700  |
| C | 5.11559100  | -3.60218200 | 0.47259800  |
| H | 5.95500800  | -4.29168800 | 0.63873300  |
| H | 4.34336900  | -3.86383600 | 1.20021200  |
| H | 4.70430000  | -3.81860200 | -0.51653100 |
| C | 6.16889900  | -1.97715500 | 2.05686600  |
| H | 5.41505300  | -2.19761600 | 2.81778600  |
| H | 7.00691200  | -2.67099100 | 2.20928800  |
| H | 6.54450700  | -0.96731900 | 2.25511500  |
| C | 6.80223200  | -1.96201000 | -0.36633000 |
| H | 7.57152700  | -2.71269000 | -0.13897000 |
| H | 6.52075500  | -2.09864600 | -1.41327900 |
| H | 7.27661700  | -0.98196300 | -0.29246400 |
| P | -0.37783200 | -1.65512400 | -0.38046400 |
| P | -1.64537400 | 1.50550700  | -0.27669500 |
| C | -2.13546500 | 5.10670000  | -3.15978600 |
| C | -2.55622900 | 5.24074100  | -1.83658600 |
| C | -2.40086100 | 4.18592700  | -0.93412700 |
| C | -1.80947200 | 2.98798900  | -1.34925700 |
| C | -1.35710200 | 2.87212000  | -2.67494100 |
| C | -1.52939100 | 3.91880600  | -3.57796700 |
| H | -2.72100500 | 4.31198600  | 0.09355900  |
| H | -0.87275200 | 1.95594400  | -3.00274100 |
| C | 2.05362600  | -5.60902500 | -0.12091700 |
| C | 1.27784900  | -5.23668100 | 0.97722600  |
| C | 0.55359800  | -4.04185200 | 0.95935900  |
| C | 0.60935900  | -3.19607900 | -0.15855500 |
| C | 1.37134300  | -3.59388500 | -1.27121600 |
| C | 2.08901700  | -4.78704200 | -1.24957500 |
| H | -0.06257900 | -3.79301400 | 1.81399100  |
| H | 1.38843600  | -2.98399100 | -2.16718200 |
| C | -2.91653900 | -3.09213900 | -3.98520000 |
| C | -2.77481700 | -3.90341200 | -2.85619100 |
| C | -2.02173600 | -3.46450200 | -1.77041700 |
| C | -1.41592600 | -2.19716300 | -1.79578000 |
| C | -1.55497300 | -1.39443200 | -2.93344300 |

|   |             |             |             |
|---|-------------|-------------|-------------|
| C | -2.30255500 | -1.83965200 | -4.02387600 |
| H | -1.90650900 | -4.10540700 | -0.90181200 |
| H | -1.09095300 | -0.41580100 | -2.95937100 |
| C | -2.54155100 | 2.61354100  | 4.12391300  |
| C | -3.53420700 | 2.78678000  | 3.15526300  |
| C | -3.27497600 | 2.46684400  | 1.82385600  |
| C | -2.01053100 | 1.98535900  | 1.44727600  |
| C | -1.02644500 | 1.79418300  | 2.42723000  |
| C | -1.29117100 | 2.11259400  | 3.75864000  |
| H | -4.06288400 | 2.56427700  | 1.08251800  |
| H | -0.06457100 | 1.36872000  | 2.15723400  |
| H | -5.97336600 | -4.57225200 | -0.13537800 |
| C | -3.44418600 | -0.69585300 | -0.15044200 |
| C | -3.11665300 | 0.49224600  | -0.80703300 |
| C | -3.85816200 | 0.87402300  | -1.95963200 |
| H | -3.64308800 | 1.81009200  | -2.45735800 |
| C | -4.85101700 | 0.06895600  | -2.46399000 |
| H | -5.40097200 | 0.37831900  | -3.34915700 |
| C | -5.16556300 | -1.17132500 | -1.85873200 |
| C | -4.46775300 | -1.54999100 | -0.66785000 |
| H | -4.26824700 | -3.09365300 | 0.84256500  |
| C | -4.79045600 | -2.79544200 | -0.05983400 |
| C | -5.74306000 | -3.62279100 | -0.61009700 |
| H | -7.17472600 | -3.91174600 | -2.21596300 |
| C | -6.42608900 | -3.24806500 | -1.79316500 |
| H | -6.66480400 | -1.74874500 | -3.30760600 |
| C | -6.14398100 | -2.04596800 | -2.40106100 |
| H | -5.29764600 | -0.39661700 | 5.78196500  |
| C | -1.37344600 | -1.37430700 | 3.56294900  |
| H | -0.81911800 | -1.44673300 | 4.49408200  |
| C | -0.72082800 | -1.54757600 | 2.37031700  |
| H | 0.34479900  | -1.72533600 | 2.37459400  |
| C | -1.41441000 | -1.46179600 | 1.13128800  |
| C | -2.74698400 | -1.06038000 | 1.11916700  |
| C | -3.45052800 | -0.87722500 | 2.36018800  |
| C | -2.75586000 | -1.06576000 | 3.59822200  |
| H | -2.90284800 | -1.03208400 | 5.75440100  |
| C | -3.44643100 | -0.88538400 | 4.82452300  |
| C | -4.77585900 | -0.52852600 | 4.83854200  |
| H | -6.51086600 | -0.03775700 | 3.63435100  |
| C | -5.46377900 | -0.32638800 | 3.61914500  |
| H | -5.36087300 | -0.32287500 | 1.48989800  |
| C | -4.81850800 | -0.48837400 | 2.41283100  |
| H | -2.26580700 | 5.92732000  | -3.85931500 |

|   |             |             |             |
|---|-------------|-------------|-------------|
| H | 2.61553900  | -6.53836100 | -0.10332600 |
| H | -3.50349500 | -3.43708800 | -4.83138900 |
| H | -2.75131800 | 2.85045300  | 5.16280400  |
| H | -3.00462200 | 6.17038200  | -1.49870200 |
| H | -1.18406900 | 3.81142900  | -4.60246300 |
| H | 1.22151400  | -5.88061100 | 1.85042200  |
| H | 2.67530600  | -5.07125900 | -2.11846500 |
| H | -0.52635100 | 1.94315000  | 4.51088500  |
| H | -4.51672300 | 3.15032300  | 3.44054100  |
| H | -2.41043400 | -1.20395200 | -4.89799300 |
| H | -3.25600000 | -4.87587100 | -2.81873200 |

### INT25

|    |            |             |             |
|----|------------|-------------|-------------|
| C  | 3.57545200 | -1.59248600 | -1.22716800 |
| C  | 3.51447100 | -2.81068300 | -1.90882200 |
| C  | 2.77904100 | -0.51518400 | -1.71395700 |
| C  | 2.63553500 | -3.01254000 | -2.98455600 |
| H  | 4.14334200 | -3.63798200 | -1.59657100 |
| C  | 1.89796400 | -0.72195800 | -2.79776000 |
| C  | 1.80461000 | -1.98105500 | -3.40777700 |
| H  | 2.60157200 | -3.97835800 | -3.48030500 |
| H  | 1.37508300 | 0.12906500  | -3.22517000 |
| H  | 1.11791300 | -2.13109800 | -4.23536800 |
| C  | 5.32221500 | 0.51419000  | -0.33381900 |
| C  | 4.40118400 | 1.33840200  | -1.03019400 |
| C  | 6.64129100 | 0.96815200  | -0.18383200 |
| C  | 4.82905300 | 2.55736800  | -1.57219600 |
| C  | 7.05570500 | 2.19286900  | -0.71000100 |
| C  | 6.14708000 | 2.98365000  | -1.41205600 |
| H  | 4.13500300 | 3.16936400  | -2.13330000 |
| H  | 8.08332400 | 2.52049500  | -0.58054000 |
| H  | 6.46228800 | 3.92956000  | -1.84354900 |
| H  | 7.36676200 | 0.36086500  | 0.34668000  |
| Pd | 0.44454100 | 0.11838300  | -0.61474400 |
| Si | 4.65298200 | -1.14095900 | 0.26708100  |
| C  | 2.98230200 | 0.87828800  | -1.18324000 |
| C  | 1.90047700 | 1.58035600  | -0.78759200 |
| C  | 1.87474700 | 2.96298900  | -0.29651700 |
| C  | 1.93802800 | 4.05208400  | -1.18439700 |
| C  | 1.80026100 | 3.23049000  | 1.08120700  |
| C  | 1.93379800 | 5.36147000  | -0.71033500 |
| H  | 1.96711800 | 3.86420700  | -2.25185400 |
| C  | 1.79033900 | 4.54048400  | 1.55524100  |
| H  | 1.77563800 | 2.40252800  | 1.77638900  |

|   |             |             |             |
|---|-------------|-------------|-------------|
| C | 1.85575400  | 5.61254100  | 0.66167200  |
| H | 1.97949900  | 6.18608700  | -1.41570100 |
| H | 1.73522400  | 4.72277900  | 2.62501700  |
| H | 1.84790200  | 6.63409800  | 1.03107900  |
| C | 3.50472800  | -0.81805100 | 1.73962200  |
| C | 2.61709800  | -1.80470800 | 2.20940900  |
| C | 3.54709500  | 0.40395500  | 2.43450700  |
| C | 1.81843600  | -1.58812100 | 3.33359600  |
| H | 2.54362500  | -2.75967600 | 1.70079700  |
| C | 2.74068500  | 0.63128100  | 3.55375400  |
| H | 4.21126300  | 1.19372700  | 2.09316800  |
| C | 1.87468600  | -0.36594800 | 4.00800900  |
| H | 1.17037000  | -2.38289400 | 3.69273400  |
| H | 2.79575800  | 1.58438700  | 4.07393800  |
| H | 1.25823600  | -0.19851600 | 4.88751200  |
| C | 5.97184400  | -2.45036200 | 0.73099900  |
| C | 5.30366000  | -3.79321700 | 1.10911100  |
| H | 6.07839300  | -4.53245400 | 1.35526200  |
| H | 4.65936000  | -3.69292900 | 1.98891200  |
| H | 4.70062900  | -4.21691700 | 0.29910600  |
| C | 6.75748100  | -1.96898500 | 1.97406000  |
| H | 6.09317100  | -1.79058900 | 2.82752100  |
| H | 7.48396900  | -2.73704500 | 2.27338400  |
| H | 7.31967600  | -1.04781900 | 1.79306900  |
| C | 6.94332500  | -2.67477300 | -0.44825600 |
| H | 7.70952500  | -3.41146900 | -0.16962400 |
| H | 6.43028000  | -3.05583700 | -1.33890700 |
| H | 7.46036400  | -1.75396700 | -0.73838900 |
| P | -1.04743500 | -1.80260800 | -0.11668900 |
| P | -1.33993000 | 1.62159800  | -0.43227500 |
| C | -0.81225400 | 5.22694800  | -3.30048900 |
| C | -1.23078800 | 5.45943300  | -1.99106900 |
| C | -1.37520900 | 4.39773800  | -1.09450900 |
| C | -1.09720100 | 3.08992700  | -1.50527900 |
| C | -0.64381400 | 2.86561800  | -2.81739500 |
| C | -0.51360200 | 3.92423600  | -3.71274500 |
| H | -1.67036400 | 4.60414400  | -0.07317500 |
| H | -0.39149700 | 1.85746800  | -3.13521200 |
| C | 0.74875300  | -5.91396800 | 1.05013100  |
| C | -0.51521500 | -5.56976200 | 1.53918900  |
| C | -1.07272500 | -4.32742900 | 1.23709300  |
| C | -0.36017900 | -3.40748900 | 0.44886000  |
| C | 0.90227300  | -3.76129600 | -0.03629900 |
| C | 1.45491700  | -5.00865000 | 0.25692400  |

|   |             |             |             |
|---|-------------|-------------|-------------|
| H | -2.05206600 | -4.07283600 | 1.63020900  |
| H | 1.45609800  | -3.05559200 | -0.63889700 |
| C | -3.56908900 | -3.12983900 | -3.77789900 |
| C | -3.78831000 | -3.73402900 | -2.53689600 |
| C | -3.04700200 | -3.33935000 | -1.42569600 |
| C | -2.08454500 | -2.32479400 | -1.54127800 |
| C | -1.86428000 | -1.72938800 | -2.79082300 |
| C | -2.60359300 | -2.13025600 | -3.90438700 |
| H | -3.22765900 | -3.81509800 | -0.46748900 |
| H | -1.12264400 | -0.94220800 | -2.88490600 |
| C | -2.04852200 | 3.02911000  | 3.91400200  |
| C | -2.90591000 | 3.45894200  | 2.89807800  |
| C | -2.70362200 | 3.03438200  | 1.58631400  |
| C | -1.62538000 | 2.18777400  | 1.27824500  |
| C | -0.78531400 | 1.73915300  | 2.30636300  |
| C | -0.99496400 | 2.16315800  | 3.61690800  |
| H | -3.40035500 | 3.33732200  | 0.81043500  |
| H | 0.01636900  | 1.04072300  | 2.08973900  |
| H | -7.22335100 | -2.99799000 | -0.19295500 |
| C | -3.66950600 | -0.02778900 | -0.29699300 |
| C | -2.95771800 | 0.92687600  | -1.02963500 |
| C | -3.42873200 | 1.30443900  | -2.31981900 |
| H | -2.91095800 | 2.06728800  | -2.88455200 |
| C | -4.54440600 | 0.72397600  | -2.86926900 |
| H | -4.88096900 | 1.02761400  | -3.85721700 |
| C | -5.27017800 | -0.27059500 | -2.17128100 |
| C | -4.84053900 | -0.63695400 | -0.85629900 |
| H | -5.26707300 | -1.92944600 | 0.83437900  |
| C | -5.57915000 | -1.63599900 | -0.16107100 |
| C | -6.67436600 | -2.23668500 | -0.73963700 |
| H | -7.95642900 | -2.35777800 | -2.48711200 |
| C | -7.09140300 | -1.87380600 | -2.04315400 |
| H | -6.71354700 | -0.62211500 | -3.74298700 |
| C | -6.40206800 | -0.90938800 | -2.74213300 |
| H | -5.91954600 | 1.39373000  | 5.33383400  |
| C | -2.38052800 | -1.06628400 | 3.68554600  |
| H | -2.02811800 | -1.29254600 | 4.68880800  |
| C | -1.70385900 | -1.55030800 | 2.59499400  |
| H | -0.81650500 | -2.15007700 | 2.74441400  |
| C | -2.14142300 | -1.26597400 | 1.27000100  |
| C | -3.24317200 | -0.43925900 | 1.07596900  |
| C | -3.98305000 | 0.05305000  | 2.20445400  |
| C | -3.54068600 | -0.26731800 | 3.52791900  |
| H | -3.90600800 | -0.01490800 | 5.64395600  |

|   |             |             |             |
|---|-------------|-------------|-------------|
| C | -4.25678000 | 0.23461000  | 4.64578700  |
| C | -5.37502300 | 1.01859200  | 4.47221300  |
| H | -6.70033600 | 1.95572000  | 3.03439000  |
| C | -5.81747600 | 1.33681500  | 3.16663000  |
| H | -5.48609800 | 1.13138200  | 1.06946800  |
| C | -5.13747400 | 0.87237500  | 2.06233500  |
| H | -0.70545700 | 6.05533900  | -3.99476400 |
| H | 1.17766000  | -6.88323100 | 1.28743800  |
| H | -4.15032100 | -3.43850500 | -4.64193200 |
| H | -2.21557600 | 3.35392000  | 4.93672700  |
| H | -1.43795300 | 6.47146300  | -1.65601900 |
| H | -0.17003200 | 3.73585300  | -4.72594000 |
| H | -1.06981200 | -6.27141100 | 2.15575300  |
| H | 2.43748100  | -5.26499400 | -0.12874000 |
| H | -0.33993600 | 1.80143000  | 4.40374900  |
| H | -3.74697700 | 4.10472900  | 3.13024700  |
| H | -2.43115600 | -1.65534700 | -4.86623600 |
| H | -4.54369200 | -4.50695200 | -2.43278800 |

### TS13

|    |             |             |             |
|----|-------------|-------------|-------------|
| C  | -2.36465700 | -1.95646600 | 0.08356800  |
| C  | -1.96810600 | -0.99943400 | 1.01922000  |
| C  | -2.55179300 | -0.05618900 | 1.90850700  |
| C  | -2.89635200 | -1.65912200 | -1.26815500 |
| C  | -3.48310900 | 0.87708800  | 1.37433700  |
| C  | -3.44530600 | -0.39426600 | -1.59719000 |
| C  | -3.32990900 | -2.46929500 | -3.52130300 |
| H  | -3.30479600 | -3.27883900 | -4.24446300 |
| C  | -3.77403500 | -1.19838000 | -3.89437300 |
| H  | -4.10044000 | -1.00484600 | -4.91230100 |
| C  | -3.81518700 | -0.18035600 | -2.94156900 |
| H  | -4.18406400 | 0.79748800  | -3.24052900 |
| C  | -2.85636500 | -2.68283600 | -2.23198500 |
| H  | -2.43710900 | -3.64647300 | -1.96019000 |
| C  | -2.53476600 | 1.06760400  | 4.05719800  |
| H  | -2.19908100 | 1.12489900  | 5.08778200  |
| C  | -3.38245100 | 2.04683300  | 3.52548000  |
| H  | -3.69930900 | 2.88332400  | 4.14187400  |
| C  | -3.82218600 | 1.95908100  | 2.20363000  |
| H  | -4.45223900 | 2.75260500  | 1.81388200  |
| C  | -2.08009200 | 0.04870800  | 3.23693400  |
| H  | -1.38597500 | -0.69477800 | 3.60427900  |
| Si | -4.16403100 | 0.89338700  | -0.40697800 |
| C  | -6.06345000 | 0.54035700  | -0.30000400 |



|    |             |             |             |
|----|-------------|-------------|-------------|
| C  | -3.70149900 | 2.59719200  | -1.07053100 |
| C  | -4.51078300 | 3.73613800  | -0.90374800 |
| C  | -2.43108100 | 2.77640200  | -1.65310900 |
| C  | -4.07031200 | 5.00315400  | -1.29329600 |
| H  | -5.50115100 | 3.64253700  | -0.46783300 |
| C  | -1.98293400 | 4.04135300  | -2.03616700 |
| H  | -1.77616100 | 1.92132700  | -1.80765000 |
| C  | -2.80150500 | 5.15857500  | -1.85557100 |
| H  | -4.71660200 | 5.86613400  | -1.15792000 |
| H  | -0.98946700 | 4.15503300  | -2.45668600 |
| H  | -2.45344300 | 6.14410700  | -2.15265700 |
| Pd | -0.16969300 | -1.18235400 | 0.28897000  |
| P  | 1.26143100  | 0.18990600  | 1.74568900  |
| P  | 1.52981700  | -1.29500700 | -1.52344400 |
| C  | 0.46045200  | -2.82479100 | -5.78479200 |
| C  | 1.68991800  | -3.17244100 | -5.22284800 |
| C  | 2.02732600  | -2.73539000 | -3.94154600 |
| C  | 1.13049400  | -1.95068900 | -3.19755700 |
| C  | -0.12446900 | -1.64848700 | -3.75203000 |
| C  | -0.44507900 | -2.06353200 | -5.04496100 |
| H  | 2.98941100  | -3.01266900 | -3.52782300 |
| H  | -0.85211500 | -1.08170500 | -3.17965000 |
| C  | 0.86309600  | -1.82765100 | 5.91663400  |
| C  | 1.07877600  | -2.58018400 | 4.75812700  |
| C  | 1.22095600  | -1.93965000 | 3.52829600  |
| C  | 1.16035100  | -0.53724300 | 3.43563300  |
| C  | 0.95679900  | 0.20874400  | 4.60478500  |
| C  | 0.80573500  | -0.43529900 | 5.83574800  |
| H  | 1.38336100  | -2.53144100 | 2.63082900  |
| H  | 0.88521100  | 1.28932600  | 4.55762400  |
| C  | 0.14454000  | 4.67075300  | 2.09054400  |
| C  | -0.61410600 | 3.81421900  | 1.29168300  |
| C  | -0.27254300 | 2.46437700  | 1.20059300  |
| C  | 0.82733100  | 1.96071400  | 1.90652200  |
| C  | 1.60339800  | 2.83574500  | 2.68585100  |
| C  | 1.25475200  | 4.18148400  | 2.78519600  |
| H  | -0.85376800 | 1.80759400  | 0.56398800  |
| H  | 2.48735500  | 2.46711100  | 3.19950800  |
| C  | 5.36226700  | -3.60384800 | -0.33417300 |
| C  | 5.43501000  | -2.63739700 | -1.34064800 |
| C  | 4.29525800  | -1.92295500 | -1.70577600 |
| C  | 3.07182400  | -2.16267600 | -1.06146900 |
| C  | 3.00646300  | -3.13874800 | -0.05667500 |
| C  | 4.14697900  | -3.85685100 | 0.30526500  |

|   |             |             |             |
|---|-------------|-------------|-------------|
| H | 4.36157800  | -1.16299200 | -2.47748400 |
| H | 2.05879700  | -3.33766500 | 0.43877200  |
| H | 3.83408700  | 5.54165400  | 0.52366200  |
| C | 2.63544500  | 1.28449200  | -0.87044600 |
| C | 1.90495100  | 0.51247100  | -1.78028700 |
| C | 1.21064900  | 1.16508200  | -2.84052900 |
| H | 0.68378700  | 0.57659400  | -3.57964900 |
| C | 1.21664300  | 2.53035200  | -2.97465800 |
| H | 0.69713900  | 2.99380200  | -3.80987100 |
| C | 1.89978500  | 3.34982500  | -2.04384800 |
| C | 2.63019000  | 2.71938500  | -0.98627600 |
| H | 3.89036400  | 3.10120600  | 0.73693800  |
| C | 3.33301300  | 3.55505000  | -0.07334700 |
| C | 3.29885900  | 4.92596800  | -0.19342200 |
| H | 2.55930500  | 6.62503100  | -1.32459900 |
| C | 2.57191000  | 5.54230300  | -1.23947700 |
| H | 1.33683000  | 5.22484500  | -2.96380600 |
| C | 1.88994100  | 4.76592600  | -2.14775600 |
| H | 8.78242700  | 0.43142800  | -0.86866500 |
| C | 5.33283600  | -0.36069800 | 2.08780500  |
| H | 6.01921100  | -0.76797700 | 2.82583800  |
| C | 3.98719000  | -0.31427400 | 2.35142100  |
| H | 3.62083400  | -0.68111800 | 3.30245600  |
| C | 3.07116400  | 0.20759700  | 1.39517300  |
| C | 3.53683800  | 0.69092000  | 0.17467500  |
| C | 4.94521500  | 0.66806200  | -0.10619200 |
| C | 5.84892100  | 0.11593100  | 0.85779100  |
| H | 7.90594400  | -0.38285900 | 1.30036900  |
| C | 7.23497000  | 0.04216500  | 0.55822200  |
| C | 7.72089500  | 0.49389100  | -0.64741900 |
| H | 7.22200600  | 1.41010400  | -2.54956300 |
| C | 6.83377000  | 1.04882200  | -1.60155000 |
| H | 4.82076600  | 1.56281600  | -2.08093100 |
| C | 5.48511200  | 1.13819800  | -1.33737000 |
| H | 0.20558900  | -3.15366200 | -6.78825700 |
| H | 0.74121400  | -2.32443100 | 6.87468800  |
| H | -0.11775500 | 5.72263100  | 2.16086700  |
| H | 6.25228800  | -4.15673800 | -0.04761600 |
| H | 2.39486900  | -3.77979700 | -5.78349700 |
| H | -1.41058800 | -1.80016300 | -5.46352200 |
| H | 1.12984900  | -3.66407700 | 4.81218600  |
| H | 0.64116300  | 0.15541500  | 6.73266400  |
| H | 4.08723500  | -4.60970900 | 1.08616500  |
| H | 6.38097000  | -2.42454000 | -1.82899700 |

|   |             |             |             |
|---|-------------|-------------|-------------|
| H | 1.85893900  | 4.85179000  | 3.39007000  |
| H | -1.46256400 | 4.18917100  | 0.72865100  |
| C | -2.70271700 | -3.24598600 | 0.77859400  |
| C | -1.85274300 | -3.79335500 | 1.75843200  |
| C | -3.93715700 | -3.87713200 | 0.53045700  |
| C | -2.22434300 | -4.93520300 | 2.46766200  |
| H | -0.89008200 | -3.32887100 | 1.94811100  |
| C | -4.29626400 | -5.02527300 | 1.23117100  |
| H | -4.61084000 | -3.46500300 | -0.21170100 |
| C | -3.44534500 | -5.55754200 | 2.20573700  |
| H | -1.55169300 | -5.34405400 | 3.21651500  |
| H | -5.24822100 | -5.50397200 | 1.01981100  |
| H | -3.73151600 | -6.45292200 | 2.74965100  |
| C | -6.76670600 | 0.92369200  | -1.62017900 |
| H | -6.38691900 | 0.34686500  | -2.46948900 |
| H | -7.84200300 | 0.71252400  | -1.54114100 |
| H | -6.65574800 | 1.98788300  | -1.85678600 |
| C | -6.74846200 | 1.29030500  | 0.86377500  |
| H | -7.81808100 | 1.04081900  | 0.87760700  |
| H | -6.33513800 | 1.00889500  | 1.83745000  |
| H | -6.67784700 | 2.37989900  | 0.76910800  |
| C | -6.24246700 | -0.97698600 | -0.06061300 |
| H | -5.87092500 | -1.56479100 | -0.90675900 |
| H | -5.72377400 | -1.31814700 | 0.84480900  |
| H | -7.30797400 | -1.21325400 | 0.06441200  |

## INT20

|   |            |             |             |
|---|------------|-------------|-------------|
| C | 2.22944700 | -1.08345700 | -0.24705200 |
| C | 1.94835500 | 0.26770400  | -0.23476900 |
| C | 2.71720400 | 1.47389500  | -0.08573500 |
| C | 3.20203100 | -1.68692900 | 0.72266500  |
| C | 4.14026600 | 1.52558000  | -0.26051100 |
| C | 4.57840400 | -1.37002200 | 0.69469300  |
| C | 3.56695000 | -3.25599600 | 2.54663500  |
| H | 3.15794600 | -3.95100400 | 3.27434400  |
| C | 4.93788500 | -3.00852200 | 2.48497700  |
| H | 5.62167200 | -3.52430300 | 3.15325200  |
| C | 5.42486000 | -2.06285500 | 1.58328300  |
| H | 6.48720900 | -1.83805700 | 1.58668700  |
| C | 2.70696000 | -2.59513700 | 1.67272000  |
| H | 1.63964300 | -2.77207700 | 1.73768200  |
| C | 2.64300300 | 3.91544400  | 0.12791800  |
| H | 2.06588700 | 4.82170800  | 0.28545100  |
| C | 4.01832700 | 3.97455700  | -0.10175200 |

|    |             |             |             |
|----|-------------|-------------|-------------|
| H  | 4.53006600  | 4.93245700  | -0.13436800 |
| C  | 4.74439600  | 2.79193100  | -0.26889300 |
| H  | 5.82166000  | 2.86302500  | -0.38665100 |
| C  | 2.01050400  | 2.68197100  | 0.13538200  |
| H  | 0.94410200  | 2.63383100  | 0.29990900  |
| Si | 5.33019900  | 0.03574800  | -0.32987700 |
| C  | 5.73913900  | -0.42216500 | -2.14966900 |
| C  | 6.85259600  | 0.59535600  | 0.65285900  |
| C  | 8.18794800  | 0.42799100  | 0.24711000  |
| C  | 6.63125200  | 1.17175500  | 1.92148600  |
| C  | 9.25340200  | 0.82238700  | 1.06193100  |
| H  | 8.41767000  | -0.01543800 | -0.71538500 |
| C  | 7.68798700  | 1.56737200  | 2.73975900  |
| H  | 5.61316700  | 1.31697300  | 2.27621500  |
| C  | 9.00644400  | 1.39404300  | 2.30969200  |
| H  | 10.27480600 | 0.68158300  | 0.71874300  |
| H  | 7.48517600  | 2.01008600  | 3.71140900  |
| H  | 9.83348900  | 1.70145600  | 2.94383200  |
| Pd | -0.03372500 | -0.18271100 | -0.03815800 |
| P  | -1.40031300 | 1.56550700  | -0.73802000 |
| P  | -1.84031300 | -1.41096700 | 0.96815500  |
| C  | 0.30411400  | -3.78204700 | 4.32874700  |
| C  | -0.43701300 | -4.47507800 | 3.37012300  |
| C  | -1.13301000 | -3.78097600 | 2.37650700  |
| C  | -1.08196100 | -2.38038100 | 2.32867700  |
| C  | -0.30510900 | -1.69130200 | 3.28023100  |
| C  | 0.36802600  | -2.38600100 | 4.28248100  |
| H  | -1.70888400 | -4.33163500 | 1.64041700  |
| H  | -0.21756600 | -0.60904300 | 3.22620500  |
| C  | 0.80282400  | 4.05030500  | -3.98635500 |
| C  | 0.68091700  | 2.66225100  | -4.10140800 |
| C  | -0.01558900 | 1.94226400  | -3.13433000 |
| C  | -0.62037100 | 2.59608400  | -2.04625500 |
| C  | -0.49200200 | 3.98826100  | -1.93901100 |
| C  | 0.21653600  | 4.70716700  | -2.90518000 |
| H  | -0.08527300 | 0.86347500  | -3.21657200 |
| H  | -0.92486100 | 4.51798600  | -1.09843000 |
| C  | -2.63467600 | 4.47521800  | 2.64181000  |
| C  | -1.68445700 | 3.48146800  | 2.88556000  |
| C  | -1.30765300 | 2.60949100  | 1.86431000  |
| C  | -1.88253900 | 2.72461500  | 0.59049400  |
| C  | -2.84176300 | 3.72313200  | 0.35363000  |
| C  | -3.21003900 | 4.59694700  | 1.37465400  |
| H  | -0.58049300 | 1.82502500  | 2.05548700  |

|   |             |             |             |
|---|-------------|-------------|-------------|
| H | -3.31495400 | 3.80246000  | -0.62077300 |
| C | -4.13201200 | -4.28884500 | -1.82051800 |
| C | -4.54228000 | -4.15017200 | -0.49107500 |
| C | -3.84927000 | -3.29970300 | 0.36792600  |
| C | -2.73206200 | -2.58870800 | -0.09920400 |
| C | -2.31890700 | -2.73769600 | -1.42955700 |
| C | -3.02021600 | -3.58546200 | -2.28661800 |
| H | -4.18515700 | -3.17295600 | 1.39363600  |
| H | -1.46493700 | -2.18079800 | -1.79920300 |
| H | -7.15297100 | 3.78725400  | 0.67173800  |
| C | -3.93802300 | 0.45326300  | 0.90012300  |
| C | -3.13827700 | -0.34114300 | 1.72414000  |
| C | -3.22708200 | -0.21059000 | 3.13666100  |
| H | -2.63103600 | -0.85132600 | 3.77505700  |
| C | -4.06172200 | 0.71732900  | 3.70994400  |
| H | -4.11264200 | 0.80855300  | 4.79201000  |
| C | -4.87336900 | 1.55854400  | 2.91030200  |
| C | -4.83698000 | 1.40587500  | 1.48649700  |
| H | -5.68145300 | 2.12919700  | -0.37737400 |
| C | -5.68805600 | 2.23405800  | 0.70123600  |
| C | -6.51124900 | 3.16692700  | 1.29098500  |
| H | -7.18152300 | 4.06867300  | 3.14876400  |
| C | -6.52889700 | 3.32701600  | 2.69745200  |
| H | -5.73794100 | 2.64358100  | 4.56947500  |
| C | -5.72632800 | 2.53651600  | 3.48781000  |
| H | -8.03780900 | -2.32913000 | -2.83234300 |
| C | -4.12510100 | 0.04357300  | -3.40668300 |
| H | -4.19418000 | -0.04282900 | -4.48811300 |
| C | -3.08044600 | 0.72931300  | -2.83922900 |
| H | -2.34337700 | 1.18850600  | -3.48536100 |
| C | -2.96727200 | 0.86484900  | -1.42676500 |
| C | -3.94693600 | 0.30939000  | -0.59648400 |
| C | -5.05528700 | -0.39504500 | -1.18123500 |
| C | -5.13368500 | -0.54254100 | -2.60372300 |
| H | -6.26238400 | -1.35551000 | -4.25943600 |
| C | -6.22089900 | -1.25261500 | -3.17813500 |
| C | -7.20654100 | -1.79251000 | -2.38438700 |
| H | -7.91810000 | -2.07448100 | -0.35534200 |
| C | -7.13861500 | -1.64550400 | -0.97847300 |
| H | -6.05135000 | -0.87763300 | 0.68610700  |
| C | -6.09209700 | -0.97012300 | -0.39245000 |
| H | 0.83642800  | -4.32565900 | 5.10400300  |
| H | 1.35622300  | 4.61272300  | -4.73259900 |
| H | -2.93413300 | 5.14865400  | 3.43937300  |

|   |             |             |             |
|---|-------------|-------------|-------------|
| H | -4.68405800 | -4.94072300 | -2.49137000 |
| H | -0.48160700 | -5.56012400 | 3.39600500  |
| H | 0.96011500  | -1.84133300 | 5.01184200  |
| H | 1.13744100  | 2.14013600  | -4.93751500 |
| H | 0.31210100  | 5.78451600  | -2.80475200 |
| H | -2.69778300 | -3.68847400 | -3.31832900 |
| H | -5.41265700 | -4.69007300 | -0.13021200 |
| H | -3.96371100 | 5.35533800  | 1.18781700  |
| H | -1.24330800 | 3.37749200  | 3.87250200  |
| C | 1.57518300  | -1.97895500 | -1.26727300 |
| C | 1.23477400  | -1.43391100 | -2.52871200 |
| C | 1.37543300  | -3.36268900 | -1.08211900 |
| C | 0.68147600  | -2.22114400 | -3.53603500 |
| H | 1.47512100  | -0.39763100 | -2.72686700 |
| C | 0.83124700  | -4.14768900 | -2.09646500 |
| H | 1.65118300  | -3.83151000 | -0.14694500 |
| C | 0.47335100  | -3.58570900 | -3.32480700 |
| H | 0.44622300  | -1.77244000 | -4.49746100 |
| H | 0.68577200  | -5.21001100 | -1.92333200 |
| H | 0.05840300  | -4.20795700 | -4.11222100 |
| C | 6.59732300  | -1.70501700 | -2.20553100 |
| H | 6.08143300  | -2.55149200 | -1.73674800 |
| H | 6.79662500  | -1.97620700 | -3.25178300 |
| H | 7.56615000  | -1.59431500 | -1.70890000 |
| C | 6.47027100  | 0.75550200  | -2.83195500 |
| H | 6.68935500  | 0.50110000  | -3.87845700 |
| H | 5.85068500  | 1.66076200  | -2.83787300 |
| H | 7.41938300  | 1.00730200  | -2.34978600 |
| C | 4.43418100  | -0.68755000 | -2.92300500 |
| H | 3.90279600  | -1.56084400 | -2.53562100 |
| H | 3.75509400  | 0.17287300  | -2.88583100 |
| H | 4.65771900  | -0.88651600 | -3.98079800 |

**TS14**

|   |            |             |             |
|---|------------|-------------|-------------|
| C | 1.90653500 | 0.39204600  | 0.01685400  |
| C | 2.45277200 | -0.75481500 | -0.73177800 |
| C | 3.98362200 | 1.84595700  | 0.54946100  |
| C | 3.61297900 | -1.50558000 | -0.36987700 |
| C | 5.12007900 | 1.01138500  | 0.41255800  |
| C | 1.71110900 | -1.19706800 | -1.84854100 |
| H | 0.86914100 | -0.59618200 | -2.16421300 |
| C | 1.99158000 | -2.37335500 | -2.52949200 |
| H | 1.37138100 | -2.67101400 | -3.37059600 |
| C | 3.84742000 | -2.72047300 | -1.04620700 |

|    |             |             |             |
|----|-------------|-------------|-------------|
| C  | 3.04492800  | -3.17536400 | -2.09063200 |
| H  | 4.71313200  | -3.31546300 | -0.77009000 |
| H  | 3.25943900  | -4.12561800 | -2.57151200 |
| C  | 6.37440500  | 1.61139200  | 0.18662100  |
| C  | 6.54014700  | 2.99158200  | 0.09267400  |
| C  | 5.42663600  | 3.81592600  | 0.24443200  |
| H  | 5.52619000  | 4.89714500  | 0.19443800  |
| H  | 7.52499300  | 3.41512200  | -0.08240200 |
| H  | 7.24885500  | 0.97629400  | 0.08261700  |
| C  | 2.56461100  | 1.38525700  | 0.68959800  |
| C  | 1.65921100  | 2.31628100  | 1.40861600  |
| C  | 1.95545800  | 2.87084400  | 2.66260300  |
| C  | -0.37265600 | 3.64384400  | 1.32068500  |
| H  | 2.86829900  | 2.58552900  | 3.17695000  |
| H  | -1.26914300 | 3.97286700  | 0.80838200  |
| C  | -0.05932800 | 4.21479000  | 2.55200500  |
| C  | 1.09409300  | 3.80628400  | 3.23368800  |
| H  | 1.33220600  | 4.23587700  | 4.20326200  |
| H  | -0.71029000 | 4.96936900  | 2.98521600  |
| Si | 5.07202700  | -0.85588700 | 0.65696900  |
| C  | 5.06734500  | -1.22622300 | 2.53998600  |
| C  | 6.31760700  | -0.61597000 | 3.21243700  |
| C  | 3.82616800  | -0.56088700 | 3.17243900  |
| C  | 5.02319700  | -2.74862500 | 2.78675100  |
| H  | 7.25333400  | -1.04766700 | 2.84491100  |
| H  | 6.37017200  | 0.46776600  | 3.05504800  |
| H  | 6.27903600  | -0.79142700 | 4.29705000  |
| H  | 2.89920700  | -0.85004400 | 2.67376700  |
| H  | 3.74760100  | -0.83932700 | 4.23374600  |
| H  | 3.89800700  | 0.53036800  | 3.12443400  |
| H  | 4.89650600  | -2.95666700 | 3.85952800  |
| H  | 4.19260400  | -3.22093400 | 2.25577900  |
| H  | 5.94321000  | -3.24822000 | 2.46836700  |
| C  | 6.60555500  | -1.54134500 | -0.23018700 |
| C  | 6.73708200  | -1.24436900 | -1.60377600 |
| C  | 7.62123000  | -2.31393500 | 0.35745600  |
| C  | 7.82562700  | -1.69176800 | -2.34992600 |
| H  | 5.97082000  | -0.65218900 | -2.09963900 |
| C  | 8.71544700  | -2.77022600 | -0.38434500 |
| H  | 7.57406800  | -2.57281500 | 1.40913100  |
| C  | 8.82125700  | -2.46004500 | -1.73949500 |
| H  | 7.89840900  | -1.44435900 | -3.40583700 |
| H  | 9.48368500  | -3.36686500 | 0.10034500  |
| H  | 9.67152400  | -2.81261300 | -2.31702300 |

|    |             |             |             |
|----|-------------|-------------|-------------|
| C  | 4.17680400  | 3.24893800  | 0.47671700  |
| H  | 3.33351300  | 3.91584700  | 0.62743300  |
| C  | 0.46176000  | 2.67405300  | 0.72068100  |
| Pd | -0.22416600 | 0.72355300  | 0.02641000  |
| P  | -0.98950600 | -1.54034400 | 0.08581600  |
| P  | -2.54426600 | 1.48170200  | -0.22782000 |
| C  | -2.54710100 | 5.32537000  | -2.85132700 |
| C  | -3.23294400 | 5.33646600  | -1.63607600 |
| C  | -3.25985400 | 4.19607600  | -0.82869000 |
| C  | -2.58129100 | 3.03352800  | -1.22071300 |
| C  | -1.87338100 | 3.04053300  | -2.43409000 |
| C  | -1.87096000 | 4.16920900  | -3.25265300 |
| H  | -3.80251200 | 4.22055700  | 0.11012000  |
| H  | -1.33913500 | 2.14887800  | -2.74700300 |
| C  | 1.85519100  | -4.53139800 | 2.20378700  |
| C  | 1.60094300  | -3.26559600 | 2.73790500  |
| C  | 0.81380000  | -2.35658700 | 2.03607800  |
| C  | 0.20916900  | -2.72378900 | 0.82171700  |
| C  | 0.51272400  | -3.97439400 | 0.26844100  |
| C  | 1.33807300  | -4.86791200 | 0.95430700  |
| H  | 0.66227900  | -1.35617900 | 2.43281600  |
| H  | 0.12491800  | -4.25589200 | -0.70194100 |
| C  | -2.45584600 | -3.47538300 | -3.87071000 |
| C  | -1.94295200 | -2.17594600 | -3.87245000 |
| C  | -1.50266700 | -1.59793300 | -2.68363200 |
| C  | -1.56685700 | -2.30909600 | -1.47752300 |
| C  | -2.11427900 | -3.60213500 | -1.48041100 |
| C  | -2.54511100 | -4.18444400 | -2.67202800 |
| H  | -1.13900100 | -0.57560100 | -2.68414100 |
| H  | -2.22447700 | -4.14743000 | -0.54812700 |
| C  | -4.68841400 | 2.26755600  | 3.79549700  |
| C  | -5.39565700 | 2.41278500  | 2.59944400  |
| C  | -4.75740800 | 2.19215900  | 1.38021000  |
| C  | -3.39858800 | 1.83994600  | 1.34813300  |
| C  | -2.69400800 | 1.69619100  | 2.55271700  |
| C  | -3.33927500 | 1.90849000  | 3.77033400  |
| H  | -5.32167800 | 2.26613600  | 0.45463500  |
| H  | -1.64875600 | 1.40733600  | 2.53566100  |
| H  | -6.27047000 | -4.89538300 | -1.23055200 |
| C  | -4.07239400 | -0.86143300 | -0.60334100 |
| C  | -3.69691200 | 0.36376500  | -1.15428500 |
| C  | -4.10744200 | 0.69180700  | -2.47651200 |
| H  | -3.85202900 | 1.65425000  | -2.90015700 |
| C  | -4.83909700 | -0.19024900 | -3.23324600 |



|   |             |             |             |
|---|-------------|-------------|-------------|
| H | -5.14283100 | 0.08124600  | -4.24120600 |
| C | -5.21520100 | -1.45468500 | -2.71938300 |
| C | -4.84650700 | -1.78944600 | -1.37736100 |
| H | -4.98207300 | -3.32729500 | 0.14745300  |
| C | -5.25173100 | -3.05470800 | -0.86604100 |
| C | -5.97173000 | -3.93528800 | -1.64159600 |
| H | -6.89025900 | -4.30881000 | -3.57289800 |
| C | -6.32357700 | -3.60340500 | -2.97205200 |
| H | -6.21999700 | -2.11884300 | -4.51597300 |
| C | -5.95147500 | -2.38716100 | -3.49736400 |
| H | -7.70717800 | -0.96160200 | 4.41745600  |
| C | -3.28127900 | -1.89331600 | 3.51351900  |
| H | -3.09231000 | -2.16753100 | 4.54841700  |
| C | -2.26762500 | -1.96866000 | 2.59164600  |
| H | -1.30130600 | -2.32242800 | 2.92085700  |
| C | -2.47138500 | -1.62139600 | 1.22581900  |
| C | -3.74580600 | -1.22058200 | 0.81446200  |
| C | -4.82469700 | -1.15638200 | 1.76529800  |
| C | -4.58117600 | -1.48055700 | 3.13723000  |
| H | -5.43057200 | -1.64546600 | 5.11877400  |
| C | -5.63864800 | -1.39695600 | 4.08121800  |
| C | -6.90199100 | -1.01724500 | 3.69061600  |
| H | -8.15070800 | -0.39903000 | 2.02889200  |
| C | -7.15272400 | -0.70008700 | 2.33466300  |
| H | -6.35591300 | -0.50215400 | 0.37010500  |
| C | -6.14385400 | -0.76230300 | 1.39980500  |
| H | -2.53956300 | 6.20911800  | -3.48264500 |
| H | 2.47892900  | -5.23545700 | 2.74682900  |
| H | -2.80293200 | -3.92563600 | -4.79587800 |
| H | -5.19233100 | 2.42372500  | 4.74482700  |
| H | -3.75760900 | 6.23172600  | -1.31507100 |
| H | -1.33850500 | 4.14922100  | -4.19995400 |
| H | 2.04224900  | -2.97447400 | 3.68545300  |
| H | 1.56766400  | -5.83148300 | 0.50863700  |
| H | -2.78898500 | 1.78404500  | 4.69835800  |
| H | -6.44964400 | 2.67286700  | 2.61691600  |
| H | -2.97416900 | -5.18149500 | -2.65811200 |
| H | -1.90000700 | -1.60658700 | -4.79639500 |
| H | 0.84078400  | 2.87263700  | -0.62628200 |
| N | 1.61334900  | 3.26165700  | -1.63169600 |
| C | 1.47108300  | 2.40972600  | -2.83910300 |
| C | 1.44977500  | 4.72515200  | -1.79433200 |
| H | 2.53432400  | 3.08314300  | -1.22608400 |
| H | 0.95045100  | 2.98666200  | -3.60925100 |

|   |            |            |             |
|---|------------|------------|-------------|
| H | 0.82535500 | 1.56941000 | -2.55825300 |
| H | 1.43844700 | 5.14311300 | -0.78090400 |
| H | 0.45782100 | 4.89546700 | -2.22054600 |
| C | 2.54549200 | 5.37454200 | -2.63668400 |
| H | 2.53803600 | 5.00009000 | -3.66589100 |
| H | 2.39964400 | 6.45917400 | -2.67358200 |
| H | 3.53514500 | 5.17811600 | -2.20798200 |
| C | 2.81103400 | 1.87857900 | -3.34274600 |
| H | 3.31059200 | 1.29976500 | -2.55887000 |
| H | 2.65596500 | 1.21081100 | -4.19640000 |
| H | 3.47408400 | 2.69190500 | -3.65471200 |

### INT21

|    |             |             |             |
|----|-------------|-------------|-------------|
| C  | 1.93257700  | 0.46927100  | 0.01977000  |
| C  | 2.42894400  | -0.69379500 | -0.74063500 |
| C  | 4.09757600  | 1.84552600  | 0.26799400  |
| C  | 3.54339200  | -1.50527300 | -0.36475100 |
| C  | 5.17830800  | 0.93082100  | 0.22437700  |
| C  | 1.67916200  | -1.08978600 | -1.86860800 |
| H  | 0.85901000  | -0.45380100 | -2.17845500 |
| C  | 1.91812700  | -2.26985100 | -2.56111600 |
| H  | 1.29767900  | -2.53104200 | -3.41402600 |
| C  | 3.72328600  | -2.72763700 | -1.04288200 |
| C  | 2.92270200  | -3.12659000 | -2.11216500 |
| H  | 4.54414800  | -3.37463000 | -0.74895900 |
| H  | 3.09686100  | -4.08225100 | -2.59859600 |
| C  | 6.45291100  | 1.40898200  | -0.13931800 |
| C  | 6.69071900  | 2.74192800  | -0.46637500 |
| C  | 5.63195000  | 3.64660400  | -0.41443900 |
| H  | 5.78873100  | 4.69830000  | -0.64137400 |
| H  | 7.68937300  | 3.07014600  | -0.74016600 |
| H  | 7.28580800  | 0.71378400  | -0.16654900 |
| C  | 2.66715700  | 1.49324100  | 0.56264600  |
| C  | 1.86805900  | 2.48403100  | 1.32202700  |
| C  | 2.41058200  | 3.37364400  | 2.26235500  |
| C  | -0.30506000 | 3.48250200  | 1.67256300  |
| H  | 3.46945900  | 3.32430200  | 2.49882200  |
| H  | -1.36708500 | 3.55358700  | 1.47815100  |
| C  | 0.25178500  | 4.40108000  | 2.57443400  |
| C  | 1.60659900  | 4.32852500  | 2.88912600  |
| H  | 2.04245200  | 5.01357700  | 3.61113600  |
| H  | -0.38082100 | 5.15648300  | 3.03389800  |
| Si | 5.00076300  | -0.89118800 | 0.68950500  |
| C  | 4.89132100  | -1.06164400 | 2.60036800  |

|    |             |             |             |
|----|-------------|-------------|-------------|
| C  | 6.07924000  | -0.32968300 | 3.26568900  |
| C  | 3.59213100  | -0.40331700 | 3.11325400  |
| C  | 4.89726500  | -2.55275300 | 3.00246300  |
| H  | 7.05228400  | -0.73406900 | 2.96996900  |
| H  | 6.07915200  | 0.73875800  | 3.02064300  |
| H  | 6.00518900  | -0.41929800 | 4.35881200  |
| H  | 2.70427100  | -0.80042500 | 2.61841000  |
| H  | 3.48975200  | -0.57677800 | 4.19479300  |
| H  | 3.59585700  | 0.67993600  | 2.95631800  |
| H  | 4.69577100  | -2.65449200 | 4.07903100  |
| H  | 4.13228200  | -3.12035000 | 2.46603000  |
| H  | 5.85836700  | -3.03633200 | 2.80807300  |
| C  | 6.53872300  | -1.74659100 | -0.03633800 |
| C  | 6.71117500  | -1.69987800 | -1.43716000 |
| C  | 7.55727300  | -2.36593700 | 0.70822100  |
| C  | 7.83141900  | -2.24788500 | -2.05941700 |
| H  | 5.95151400  | -1.22708600 | -2.05516200 |
| C  | 8.68367400  | -2.92077400 | 0.09275400  |
| H  | 7.48978900  | -2.42251300 | 1.78823400  |
| C  | 8.82402100  | -2.86495100 | -1.29308700 |
| H  | 7.93109700  | -2.19485900 | -3.14052800 |
| H  | 9.45010400  | -3.39464900 | 0.70030300  |
| H  | 9.69877900  | -3.29512800 | -1.77325300 |
| C  | 4.36715600  | 3.20147900  | -0.04208000 |
| H  | 3.57689600  | 3.93834900  | 0.05357000  |
| C  | 0.47346500  | 2.50082900  | 1.05108100  |
| Pd | -0.19573700 | 0.74616500  | 0.17448100  |
| P  | -1.00903400 | -1.58509100 | 0.01852800  |
| P  | -2.52198100 | 1.50436800  | -0.06552000 |
| C  | -2.41517000 | 5.50556600  | -2.45315000 |
| C  | -3.02296900 | 5.48131300  | -1.19764200 |
| C  | -3.08498400 | 4.29351500  | -0.46282700 |
| C  | -2.51481700 | 3.11629700  | -0.96445500 |
| C  | -1.87485500 | 3.15976700  | -2.21582500 |
| C  | -1.84594700 | 4.33500200  | -2.96589900 |
| H  | -3.57908100 | 4.29017600  | 0.50279700  |
| H  | -1.43257400 | 2.25323600  | -2.62031700 |
| C  | 1.84737900  | -4.62183000 | 2.05862500  |
| C  | 1.56541300  | -3.37945100 | 2.63248200  |
| C  | 0.76673900  | -2.46317200 | 1.95386000  |
| C  | 0.17829900  | -2.79867600 | 0.72258200  |
| C  | 0.49860200  | -4.02965000 | 0.13666100  |
| C  | 1.33605700  | -4.93003100 | 0.79901400  |
| H  | 0.58698400  | -1.48288500 | 2.38705800  |

|   |             |             |             |
|---|-------------|-------------|-------------|
| H | 0.11515300  | -4.28882400 | -0.84202900 |
| C | -2.50567400 | -3.33373100 | -4.01393600 |
| C | -1.98818700 | -2.03745400 | -3.95184300 |
| C | -1.53430800 | -1.52635000 | -2.73798700 |
| C | -1.58916100 | -2.29955600 | -1.56981300 |
| C | -2.13771000 | -3.58960400 | -1.63724700 |
| C | -2.58283500 | -4.10610900 | -2.85414400 |
| H | -1.16919300 | -0.50562400 | -2.68502400 |
| H | -2.23778200 | -4.18396500 | -0.73412800 |
| C | -4.83490000 | 2.04985500  | 3.90282500  |
| C | -5.47427800 | 2.32701700  | 2.69203700  |
| C | -4.78316500 | 2.18701400  | 1.48969000  |
| C | -3.43872300 | 1.78325300  | 1.49260600  |
| C | -2.80051600 | 1.51131700  | 2.71207200  |
| C | -3.49912300 | 1.64271000  | 3.91117900  |
| H | -5.29447000 | 2.36730000  | 0.54794300  |
| H | -1.76418500 | 1.18961500  | 2.71805200  |
| H | -6.32161800 | -4.74415100 | -1.52927000 |
| C | -4.06169000 | -0.79674000 | -0.62868600 |
| C | -3.66691500 | 0.45899800  | -1.09210700 |
| C | -4.07749000 | 0.88176700  | -2.38780500 |
| H | -3.82485000 | 1.87201500  | -2.74191600 |
| C | -4.81801400 | 0.06332600  | -3.20517300 |
| H | -5.12239600 | 0.41160400  | -4.18914500 |
| C | -5.20914600 | -1.22964600 | -2.78249300 |
| C | -4.84517000 | -1.65991600 | -1.46714100 |
| H | -5.00391900 | -3.29671200 | -0.05159300 |
| C | -5.27093900 | -2.95050500 | -1.04290800 |
| C | -6.00727700 | -3.76344100 | -1.87475700 |
| H | -6.93478100 | -3.98901900 | -3.82464200 |
| C | -6.35487900 | -3.33610600 | -3.17871800 |
| H | -6.22618300 | -1.75212300 | -4.61867700 |
| C | -5.96154200 | -2.09398900 | -3.62126300 |
| H | -7.76123700 | -1.21531100 | 4.32885200  |
| C | -3.34136900 | -2.15615300 | 3.40177800  |
| H | -3.17105000 | -2.51911100 | 4.41240800  |
| C | -2.31846900 | -2.18068800 | 2.48671100  |
| H | -1.36428800 | -2.58250000 | 2.79622400  |
| C | -2.49737300 | -1.72099900 | 1.15076100  |
| C | -3.75749500 | -1.25824100 | 0.76363500  |
| C | -4.84649900 | -1.24306200 | 1.70494500  |
| C | -4.62773300 | -1.68528700 | 3.04767400  |
| H | -5.50701000 | -1.99880900 | 4.99806000  |
| C | -5.69632300 | -1.66023400 | 3.98257100  |

|   |             |             |             |
|---|-------------|-------------|-------------|
| C | -6.94710100 | -1.22493800 | 3.60990800  |
| H | -8.16096600 | -0.44463800 | 1.99110200  |
| C | -7.17312600 | -0.79022700 | 2.28251600  |
| H | -6.34537400 | -0.44333600 | 0.35149200  |
| C | -6.15271000 | -0.79328200 | 1.35824000  |
| H | -2.38911500 | 6.42475000  | -3.03114500 |
| H | 2.48070800  | -5.33231500 | 2.58208000  |
| H | -2.86540000 | -3.73245400 | -4.95775900 |
| H | -5.38108700 | 2.14198100  | 4.83696300  |
| H | -3.46518900 | 6.38573200  | -0.78993200 |
| H | -1.38336000 | 4.33935100  | -3.94988400 |
| H | 1.98754400  | -3.11196200 | 3.59562200  |
| H | 1.57996700  | -5.87773000 | 0.32737300  |
| H | -3.00206400 | 1.41763400  | 4.85015400  |
| H | -6.51739600 | 2.62850400  | 2.68263100  |
| H | -3.01314800 | -5.10222800 | -2.89016600 |
| H | -1.95433500 | -1.41979200 | -4.84478700 |
| H | 0.71699300  | 2.75582400  | -1.10915300 |
| N | 1.46570200  | 3.12109500  | -1.74027100 |
| C | 1.38872700  | 2.46599500  | -3.09649600 |
| C | 1.44180500  | 4.62411400  | -1.67857700 |
| H | 2.31480600  | 2.77403900  | -1.27643100 |
| H | 0.92622700  | 3.18046600  | -3.78083600 |
| H | 0.71732700  | 1.61316900  | -2.98233400 |
| H | 1.49808700  | 4.86528000  | -0.61340300 |
| H | 0.45854400  | 4.93095600  | -2.03879400 |
| C | 2.56780600  | 5.27046100  | -2.47362600 |
| H | 2.46693600  | 5.08817500  | -3.54810300 |
| H | 2.53372300  | 6.35288400  | -2.31744800 |
| H | 3.54886500  | 4.91046700  | -2.14985400 |
| C | 2.75943100  | 1.99618000  | -3.56877000 |
| H | 3.16498500  | 1.24850400  | -2.87917800 |
| H | 2.66267700  | 1.52658800  | -4.55229000 |
| H | 3.47044200  | 2.82283600  | -3.65113500 |

**TS15**

|   |             |             |            |
|---|-------------|-------------|------------|
| C | -1.92506400 | 0.59029800  | 0.49894800 |
| C | -2.47572100 | -0.76807500 | 0.75793700 |
| C | -4.08783300 | 1.98785500  | 0.61223800 |
| C | -3.62417500 | -1.35492900 | 0.14567700 |
| C | -5.18856500 | 1.18492400  | 0.23931600 |
| C | -1.72442100 | -1.56850100 | 1.64415100 |
| H | -0.85471800 | -1.12802200 | 2.11138200 |
| C | -2.03032600 | -2.89382800 | 1.92076900 |

|    |             |             |             |
|----|-------------|-------------|-------------|
| H  | -1.40712000 | -3.45768700 | 2.60977900  |
| C  | -3.87931900 | -2.71887600 | 0.39883500  |
| C  | -3.10961500 | -3.48922500 | 1.26857000  |
| H  | -4.73368400 | -3.18890200 | -0.07825700 |
| H  | -3.35311900 | -4.53503500 | 1.43431700  |
| C  | -6.46627100 | 1.57159700  | 0.68762900  |
| C  | -6.66290700 | 2.68551900  | 1.50191700  |
| C  | -5.56649400 | 3.45652700  | 1.89141800  |
| H  | -5.69881600 | 4.32209400  | 2.53463400  |
| H  | -7.66408900 | 2.94845700  | 1.83157400  |
| H  | -7.32796600 | 0.97708700  | 0.40231000  |
| C  | -2.68085800 | 1.74225900  | 0.20814900  |
| C  | -1.96765800 | 2.84476900  | -0.43031800 |
| C  | -2.62852300 | 3.98980700  | -0.93209600 |
| C  | 0.02920400  | 3.52852100  | -1.60524300 |
| H  | -3.68627300 | 4.12915600  | -0.74056900 |
| H  | 1.06011600  | 3.38865700  | -1.90664400 |
| C  | -0.63047900 | 4.66862400  | -2.08209500 |
| C  | -1.95990900 | 4.90599200  | -1.73685800 |
| H  | -2.48259900 | 5.77892900  | -2.11638400 |
| H  | -0.09658000 | 5.36625400  | -2.72242900 |
| Si | -4.98617200 | -0.40218200 | -0.77293900 |
| C  | -4.62511500 | -0.07138800 | -2.62943600 |
| C  | -5.65795400 | 0.91120500  | -3.22284500 |
| C  | -3.22256200 | 0.55048400  | -2.80214000 |
| C  | -4.65565900 | -1.41636000 | -3.38823400 |
| H  | -6.68560400 | 0.53780400  | -3.17157500 |
| H  | -5.63279200 | 1.87747400  | -2.70472500 |
| H  | -5.43017200 | 1.09796000  | -4.28187900 |
| H  | -2.44169900 | -0.03604300 | -2.31045400 |
| H  | -2.97453200 | 0.60582900  | -3.87260100 |
| H  | -3.17762700 | 1.57060800  | -2.41172300 |
| H  | -4.37582100 | -1.25885700 | -4.44006700 |
| H  | -3.94149900 | -2.12822400 | -2.96344900 |
| H  | -5.64150100 | -1.88919000 | -3.38048700 |
| C  | -6.60750500 | -1.35231400 | -0.48861000 |
| C  | -6.90653800 | -1.76676300 | 0.82762700  |
| C  | -7.58406200 | -1.59602300 | -1.47008600 |
| C  | -8.10677800 | -2.40134500 | 1.14345200  |
| H  | -6.18508100 | -1.59218100 | 1.62235700  |
| C  | -8.79037800 | -2.23237900 | -1.16255200 |
| H  | -7.41919200 | -1.28736900 | -2.49595200 |
| C  | -9.05478000 | -2.63915400 | 0.14459700  |
| H  | -8.30358500 | -2.70964900 | 2.16696200  |

|    |             |             |             |
|----|-------------|-------------|-------------|
| H  | -9.52179000 | -2.40733300 | -1.94702200 |
| H  | -9.99164600 | -3.13408900 | 0.38546500  |
| C  | -4.29771600 | 3.11770000  | 1.43499000  |
| H  | -3.44732000 | 3.73198100  | 1.71899400  |
| C  | -0.60386800 | 2.62161700  | -0.75138800 |
| Pd | 0.18646300  | 0.83615600  | -0.16397500 |
| P  | 1.05049700  | -1.53463600 | -0.27659200 |
| P  | 2.45613900  | 1.66960200  | -0.26038300 |
| C  | 2.81764600  | 6.06129500  | 1.27435500  |
| C  | 3.77776900  | 5.56025900  | 0.39482000  |
| C  | 3.68060700  | 4.25318600  | -0.08773500 |
| C  | 2.61678300  | 3.42663400  | 0.30190200  |
| C  | 1.64495700  | 3.95005700  | 1.17097400  |
| C  | 1.74759800  | 5.25091200  | 1.66014100  |
| H  | 4.43029000  | 3.89561300  | -0.78276100 |
| H  | 0.78643600  | 3.34537200  | 1.43504200  |
| C  | -1.76997800 | -3.52516100 | -3.38533500 |
| C  | -1.15379400 | -2.29548300 | -3.63442000 |
| C  | -0.35018900 | -1.70923400 | -2.66061600 |
| C  | -0.11907900 | -2.35899200 | -1.43321500 |
| C  | -0.76858900 | -3.57205600 | -1.18063700 |
| C  | -1.59356500 | -4.14705300 | -2.15036700 |
| H  | 0.12231600  | -0.75160200 | -2.86353800 |
| H  | -0.65237900 | -4.06776400 | -0.22620000 |
| C  | 1.91300400  | -4.39138800 | 3.28520300  |
| C  | 1.68575200  | -3.03132200 | 3.50332100  |
| C  | 1.41189700  | -2.19109900 | 2.42511900  |
| C  | 1.35237100  | -2.69528700 | 1.12021900  |
| C  | 1.63692300  | -4.05295700 | 0.90445600  |
| C  | 1.89868900  | -4.89798000 | 1.98326600  |
| H  | 1.27862100  | -1.12747600 | 2.58796100  |
| H  | 1.65973400  | -4.45067800 | -0.10556600 |
| C  | 4.63215200  | 1.48303200  | -4.34580300 |
| C  | 5.38170100  | 1.68877200  | -3.18523300 |
| C  | 4.74823900  | 1.73964300  | -1.94501500 |
| C  | 3.35502600  | 1.59020600  | -1.85310100 |
| C  | 2.61110000  | 1.37256600  | -3.02245900 |
| C  | 3.24764500  | 1.32215000  | -4.26308200 |
| H  | 5.34405500  | 1.85296900  | -1.04509300 |
| H  | 1.53486900  | 1.23818600  | -2.95696900 |
| H  | 5.64980400  | -4.43743400 | 2.61911900  |
| C  | 3.86792100  | -0.57765200 | 0.77742100  |
| C  | 3.42611100  | 0.72696100  | 1.00142600  |
| C  | 3.55203400  | 1.29925200  | 2.30130900  |

|   |             |             |             |
|---|-------------|-------------|-------------|
| H | 3.23869300  | 2.32296400  | 2.46700700  |
| C | 4.08432300  | 0.58473500  | 3.34554500  |
| H | 4.18551600  | 1.04586000  | 4.32533300  |
| C | 4.51991100  | -0.75218000 | 3.16592000  |
| C | 4.41730600  | -1.34040200 | 1.86404500  |
| H | 4.75451000  | -3.15645000 | 0.72806900  |
| C | 4.84377400  | -2.68808600 | 1.70066200  |
| C | 5.34159200  | -3.40617700 | 2.76387700  |
| H | 5.85182200  | -3.39463800 | 4.87385300  |
| C | 5.45072400  | -2.81667900 | 4.04628700  |
| H | 5.12633700  | -1.05173200 | 5.22084000  |
| C | 5.04758300  | -1.51533200 | 4.24059600  |
| H | 8.44783200  | -1.46500900 | -3.31569800 |
| C | 3.93317200  | -2.39456700 | -3.13897700 |
| H | 3.95779200  | -2.86035200 | -4.12098600 |
| C | 2.74951100  | -2.31252000 | -2.44887700 |
| H | 1.85616400  | -2.72689100 | -2.89620500 |
| C | 2.68114100  | -1.69308200 | -1.16972100 |
| C | 3.84867500  | -1.20460600 | -0.58465000 |
| C | 5.10042800  | -1.30499000 | -1.28190400 |
| C | 5.13334600  | -1.88222700 | -2.59106400 |
| H | 6.36140100  | -2.36408700 | -4.30429600 |
| C | 6.35759000  | -1.92669200 | -3.30917500 |
| C | 7.51576900  | -1.42703100 | -2.75934100 |
| H | 8.41130600  | -0.48187600 | -1.02423400 |
| C | 7.49353100  | -0.86794300 | -1.45876000 |
| H | 6.32377800  | -0.37327400 | 0.25248300  |
| C | 6.32075200  | -0.81047100 | -0.73909900 |
| H | 2.89530200  | 7.07869700  | 1.64668300  |
| H | -2.40125200 | -3.98089000 | -4.14251500 |
| H | 2.12588700  | -5.04916300 | 4.12285800  |
| H | 5.12848100  | 1.43610100  | -5.31078900 |
| H | 4.60609600  | 6.18692100  | 0.07683200  |
| H | 0.98210700  | 5.63813700  | 2.32724600  |
| H | -1.31413100 | -1.78499400 | -4.57932400 |
| H | -2.09499800 | -5.08611800 | -1.93462600 |
| H | 2.66273300  | 1.14910800  | -5.16188200 |
| H | 6.46175500  | 1.78185500  | -3.24032800 |
| H | 2.10507900  | -5.94956800 | 1.80525000  |
| H | 1.74431900  | -2.62135500 | 4.50726900  |
| H | -1.45738700 | 0.99235100  | 1.70104200  |
| N | -1.23007500 | 1.37947400  | 3.07661300  |
| C | -2.06055000 | 0.67833200  | 4.09521800  |
| C | 0.21820500  | 1.36336800  | 3.40119000  |



|   |             |             |            |
|---|-------------|-------------|------------|
| H | -1.54791500 | 2.34928500  | 3.00323600 |
| H | -1.81829400 | 1.07654300  | 5.09020600 |
| H | -1.75347900 | -0.37073300 | 4.07728600 |
| H | 0.76876000  | 1.41256100  | 2.45731300 |
| H | 0.43683700  | 0.38619500  | 3.84053000 |
| C | 0.65587400  | 2.48176600  | 4.34381700 |
| H | 0.12017700  | 2.44392900  | 5.29815300 |
| H | 1.72624100  | 2.39114800  | 4.55377600 |
| H | 0.49159100  | 3.46683700  | 3.89220400 |
| C | -3.55556000 | 0.78944100  | 3.83113900 |
| H | -3.82504500 | 0.34682600  | 2.86971800 |
| H | -4.09833700 | 0.25694400  | 4.61873900 |
| H | -3.89450000 | 1.82979900  | 3.83397100 |

## INT22

|   |             |             |             |
|---|-------------|-------------|-------------|
| C | -2.23407100 | 0.19161400  | -0.93517100 |
| C | -2.87883900 | -1.14306000 | -0.90211200 |
| C | -3.50753200 | 1.53350400  | 0.81684100  |
| C | -4.28354300 | -1.35310600 | -0.92156400 |
| C | -4.84421900 | 1.07081400  | 0.74362800  |
| C | -2.02868100 | -2.25369800 | -1.00636000 |
| H | -0.96400600 | -2.09045200 | -0.99467500 |
| C | -2.51125800 | -3.55134500 | -1.12216100 |
| H | -1.81257300 | -4.38080900 | -1.18380900 |
| C | -4.74998900 | -2.67201100 | -1.07680800 |
| C | -3.88820900 | -3.76419000 | -1.17450700 |
| H | -5.81995600 | -2.85172000 | -1.11465000 |
| H | -4.28985200 | -4.76674800 | -1.29251100 |
| C | -5.69125600 | 1.35037600  | 1.83460000  |
| C | -5.25142900 | 2.04188500  | 2.96259600  |
| C | -3.93427400 | 2.49845600  | 3.02090600  |
| H | -3.57605400 | 3.04493000  | 3.88920400  |
| H | -5.93599900 | 2.23073000  | 3.78476100  |
| H | -6.72157700 | 1.01167200  | 1.80365000  |
| C | -2.49600100 | 1.34954100  | -0.25740600 |
| C | -1.74328500 | 2.57950000  | -0.63218100 |
| C | -2.44557200 | 3.78841200  | -0.80585000 |
| C | 0.29157600  | 3.70631300  | -1.30884100 |
| H | -3.50984900 | 3.81767400  | -0.59101500 |
| H | 1.36085100  | 3.71558800  | -1.48759700 |
| C | -0.42374900 | 4.88657100  | -1.52054900 |
| C | -1.79461700 | 4.93168100  | -1.25628100 |
| H | -2.35235800 | 5.85215500  | -1.40218500 |
| H | 0.09463100  | 5.77106300  | -1.88135700 |

|    |              |             |             |
|----|--------------|-------------|-------------|
| Si | -5.52875900  | 0.05091900  | -0.70767000 |
| C  | -5.76938700  | 1.03671000  | -2.35068900 |
| C  | -6.47795100  | 2.38307700  | -2.08471600 |
| C  | -4.42733400  | 1.34083500  | -3.05427900 |
| C  | -6.59966400  | 0.16347000  | -3.32223600 |
| H  | -7.46407200  | 2.26869200  | -1.62386400 |
| H  | -5.88153500  | 3.02255700  | -1.42225300 |
| H  | -6.62085100  | 2.92661300  | -3.02921900 |
| H  | -3.84473700  | 0.43079400  | -3.23634200 |
| H  | -4.62865900  | 1.80637900  | -4.02960700 |
| H  | -3.80447900  | 2.03745400  | -2.48765500 |
| H  | -6.73217200  | 0.69313300  | -4.27607100 |
| H  | -6.08716800  | -0.78171900 | -3.54186500 |
| H  | -7.59427200  | -0.08243300 | -2.94206300 |
| C  | -7.15911000  | -0.67653600 | -0.05871700 |
| C  | -7.11401700  | -1.69323600 | 0.91868700  |
| C  | -8.43052600  | -0.17771900 | -0.39850000 |
| C  | -8.27301000  | -2.19668400 | 1.50958600  |
| H  | -6.15766000  | -2.10447600 | 1.22575300  |
| C  | -9.59627500  | -0.67569800 | 0.18908900  |
| H  | -8.53016300  | 0.61595900  | -1.13026800 |
| C  | -9.52180700  | -1.68986100 | 1.14388100  |
| H  | -8.20021300  | -2.98348300 | 2.25592400  |
| H  | -10.56129500 | -0.26866800 | -0.10073200 |
| H  | -10.42717800 | -2.07947900 | 1.60121800  |
| C  | -3.08281400  | 2.26231100  | 1.94729600  |
| H  | -2.07027900  | 2.65038100  | 1.96993000  |
| C  | -0.35614200  | 2.54510900  | -0.86853300 |
| Pd | 0.50236000   | 0.71240000  | -0.61700800 |
| P  | 1.63410400   | -1.44938600 | -1.02480400 |
| P  | 2.34586500   | 1.66519000  | 0.38648700  |
| C  | 1.05773600   | 5.27402000  | 3.00775800  |
| C  | 2.20754100   | 5.37772600  | 2.22594700  |
| C  | 2.62744900   | 4.30310900  | 1.43700000  |
| C  | 1.88978100   | 3.11268800  | 1.42286600  |
| C  | 0.71933000   | 3.02479200  | 2.19504300  |
| C  | 0.31349400   | 4.09046900  | 2.99195800  |
| H  | 3.51294900   | 4.41420400  | 0.82288800  |
| H  | 0.11576900   | 2.12559300  | 2.15584400  |
| C  | -0.30483800  | -2.81459400 | -5.01915000 |
| C  | -0.11354600  | -1.45891500 | -4.73968000 |
| C  | 0.49854300   | -1.07466300 | -3.54743000 |
| C  | 0.93117800   | -2.04046200 | -2.62096000 |
| C  | 0.74330900   | -3.39808900 | -2.91443100 |

|   |             |             |             |
|---|-------------|-------------|-------------|
| C | 0.12733900  | -3.77983800 | -4.10775100 |
| H | 0.63929300  | -0.01580200 | -3.33663700 |
| H | 1.05671000  | -4.15781600 | -2.20609700 |
| C | 1.43194600  | -5.05169800 | 1.86279400  |
| C | 0.52550800  | -3.99672200 | 1.98060600  |
| C | 0.59319500  | -2.90608600 | 1.11156500  |
| C | 1.57706100  | -2.87458400 | 0.11298600  |
| C | 2.48712500  | -3.93803700 | -0.00555900 |
| C | 2.41163400  | -5.02270400 | 0.86618900  |
| H | -0.13312900 | -2.10480000 | 1.22521000  |
| H | 3.26179300  | -3.90914600 | -0.76674400 |
| C | 5.64569600  | 3.06937700  | -2.53126900 |
| C | 5.87772000  | 3.08223700  | -1.15414300 |
| C | 4.88653600  | 2.65137800  | -0.27468500 |
| C | 3.64511200  | 2.21690300  | -0.76965700 |
| C | 3.42187000  | 2.19748400  | -2.15363600 |
| C | 4.41996300  | 2.62299400  | -3.02947300 |
| H | 5.08927200  | 2.62524300  | 0.79177500  |
| H | 2.47432300  | 1.83669900  | -2.54220500 |
| H | 6.07627500  | -4.58106500 | 2.11629800  |
| C | 3.85719200  | -0.65387600 | 1.05092600  |
| C | 3.10336400  | 0.42626100  | 1.52467100  |
| C | 2.79627600  | 0.52252700  | 2.91120000  |
| H | 2.24272300  | 1.37485800  | 3.28294300  |
| C | 3.19563400  | -0.44858300 | 3.79436900  |
| H | 2.94770300  | -0.35687700 | 4.84860300  |
| C | 3.93765900  | -1.57158500 | 3.35490400  |
| C | 4.29393400  | -1.66622800 | 1.96991400  |
| H | 5.36596100  | -2.86665200 | 0.51428700  |
| C | 5.08095400  | -2.77847600 | 1.55560400  |
| C | 5.47739600  | -3.74078700 | 2.45541600  |
| H | 5.42610100  | -4.41910300 | 4.51698000  |
| C | 5.10817200  | -3.64989000 | 3.81933100  |
| H | 4.07133100  | -2.50091800 | 5.30332300  |
| C | 4.35428700  | -2.58587200 | 4.25742500  |
| H | 9.33017400  | 0.50518500  | -1.66693700 |
| C | 5.18077000  | -0.95480800 | -3.05459600 |
| H | 5.51864100  | -1.02955100 | -4.08508800 |
| C | 3.88625200  | -1.27883100 | -2.72991600 |
| H | 3.20945300  | -1.61200100 | -3.50764900 |
| C | 3.42248900  | -1.17738400 | -1.38996500 |
| C | 4.29244000  | -0.76572600 | -0.38149700 |
| C | 5.65568300  | -0.45039700 | -0.69977700 |
| C | 6.09475700  | -0.52539400 | -2.06153200 |

|   |             |             |             |
|---|-------------|-------------|-------------|
| H | 7.74648500  | -0.22592800 | -3.42493600 |
| C | 7.43041600  | -0.16803200 | -2.38656200 |
| C | 8.30960500  | 0.23795400  | -1.40887100 |
| H | 8.58432100  | 0.61546900  | 0.70930100  |
| C | 7.88478100  | 0.30093500  | -0.05994600 |
| H | 6.28493800  | 0.02767500  | 1.32266500  |
| C | 6.59413500  | -0.03195600 | 0.28573800  |
| H | 0.73562300  | 6.11243000  | 3.61823800  |
| H | -0.79157100 | -3.11618500 | -5.94196600 |
| H | 1.37898500  | -5.89517000 | 2.54544900  |
| H | 6.42420500  | 3.39495400  | -3.21466700 |
| H | 2.78258700  | 6.29905500  | 2.22113800  |
| H | -0.58959800 | 4.00150300  | 3.58886800  |
| H | -0.44699900 | -0.70208300 | -5.44388800 |
| H | -0.02068100 | -4.83454500 | -4.32118300 |
| H | 4.24189900  | 2.59610900  | -4.10032700 |
| H | 6.83901800  | 3.40149600  | -0.76460600 |
| H | 3.12377000  | -5.83775900 | 0.77596400  |
| H | -0.24144100 | -4.01428200 | 2.74928100  |
| H | -1.53216900 | 0.28999100  | -1.77626500 |
| N | -1.61110700 | -0.98482000 | 2.58967900  |
| C | -2.51477300 | -1.77944500 | 3.42333400  |
| C | -0.43428400 | -0.45001300 | 3.26875500  |
| H | -2.13533300 | -0.22324100 | 2.16349500  |
| H | -2.89553000 | -1.22546600 | 4.29935300  |
| H | -1.94117400 | -2.62934600 | 3.81899100  |
| H | 0.18853500  | 0.01901000  | 2.49713200  |
| H | 0.15779700  | -1.29687500 | 3.63948700  |
| C | -0.68564900 | 0.54572100  | 4.41139100  |
| H | -1.20188300 | 0.07310600  | 5.25303800  |
| H | 0.25989500  | 0.95440400  | 4.78815700  |
| H | -1.30721600 | 1.38185300  | 4.07031900  |
| C | -3.69513500 | -2.27698900 | 2.59389500  |
| H | -3.35117600 | -2.84260300 | 1.72233400  |
| H | -4.35610500 | -2.91125400 | 3.19503800  |
| H | -4.28305900 | -1.42636100 | 2.23238300  |

**TS16**

|   |            |            |             |
|---|------------|------------|-------------|
| P | 1.94158500 | 0.09333100 | 1.79335800  |
| P | 1.88986800 | 0.46019600 | -1.66131400 |
| C | 3.13122500 | 3.97090200 | -4.42073000 |
| C | 2.06691800 | 3.14502400 | -4.78306200 |
| C | 1.72670800 | 2.04418900 | -3.99442100 |
| C | 2.45272000 | 1.75489700 | -2.83111800 |

|   |             |             |             |
|---|-------------|-------------|-------------|
| C | 3.51085700  | 2.60503300  | -2.46092800 |
| C | 3.85438900  | 3.69684000  | -3.25644700 |
| H | 0.88612600  | 1.42191000  | -4.28088400 |
| H | 4.07062700  | 2.41361400  | -1.55009800 |
| C | 1.52372000  | 0.32275000  | 6.41101300  |
| C | 1.69353500  | 1.47181500  | 5.63266700  |
| C | 1.78211300  | 1.36621100  | 4.24621400  |
| C | 1.70056900  | 0.11268300  | 3.61655400  |
| C | 1.55532800  | -1.03608300 | 4.40494400  |
| C | 1.46011200  | -0.92761900 | 5.79506900  |
| H | 1.91985300  | 2.26273700  | 3.64473800  |
| H | 1.51348300  | -2.01686700 | 3.94258400  |
| C | 6.53582900  | 0.68666600  | 1.80781300  |
| C | 5.70113000  | 1.62241200  | 1.19427000  |
| C | 4.32098700  | 1.41319900  | 1.16840300  |
| C | 3.76828000  | 0.26814500  | 1.75628400  |
| C | 4.61007300  | -0.65318300 | 2.39590700  |
| C | 5.98828300  | -0.45039900 | 2.40925300  |
| H | 3.66583400  | 2.13567700  | 0.68781700  |
| H | 4.19093100  | -1.53598300 | 2.86854200  |
| C | -0.70130600 | -2.61687500 | -3.94375600 |
| C | 0.49846500  | -2.16124300 | -4.49881900 |
| C | 1.25602000  | -1.20398400 | -3.82840200 |
| C | 0.80238700  | -0.67232500 | -2.60792600 |
| C | -0.40083600 | -1.13102900 | -2.05991700 |
| C | -1.14440300 | -2.10794400 | -2.72470900 |
| H | 2.20101500  | -0.87182000 | -4.24931000 |
| H | -0.74339700 | -0.75197400 | -1.10397400 |
| H | 5.54314400  | -5.08843400 | 1.74907400  |
| C | 3.27088900  | -1.73952000 | -0.50712900 |
| C | 3.36040600  | -0.63786800 | -1.36160900 |
| C | 4.59942000  | -0.35041200 | -2.00043400 |
| H | 4.66265600  | 0.45889300  | -2.71565000 |
| C | 5.72659600  | -1.08771700 | -1.73732500 |
| H | 6.66261100  | -0.84482300 | -2.23390300 |
| C | 5.69469800  | -2.16005200 | -0.81387400 |
| C | 4.44472000  | -2.50974000 | -0.21130100 |
| H | 3.48743300  | -3.87381800 | 1.17914600  |
| C | 4.42492900  | -3.59199700 | 0.71360100  |
| C | 5.57925900  | -4.27102000 | 1.03454400  |
| H | 7.71601400  | -4.46245100 | 0.69993600  |
| C | 6.81421100  | -3.91615000 | 0.43914100  |
| H | 7.80739300  | -2.60558600 | -0.93727000 |
| C | 6.86612500  | -2.88508500 | -0.47094000 |

|   |             |             |             |
|---|-------------|-------------|-------------|
| H | -0.50776900 | -6.44072400 | -2.01542900 |
| C | -0.48216700 | -3.10452400 | 1.16988000  |
| H | -1.43477900 | -3.43341800 | 1.57487100  |
| C | 0.13739500  | -2.00131900 | 1.69528200  |
| H | -0.34818700 | -1.45247700 | 2.49350300  |
| C | 1.39665500  | -1.55370000 | 1.19189000  |
| C | 1.97708300  | -2.19383700 | 0.10150600  |
| C | 1.32950400  | -3.34401700 | -0.47224900 |
| C | 0.09295400  | -3.80998900 | 0.08132500  |
| H | -1.48633400 | -5.27925300 | -0.05760400 |
| C | -0.55004700 | -4.93747400 | -0.49167400 |
| C | -0.00666900 | -5.58064100 | -1.58069900 |
| H | 1.62578000  | -5.61795300 | -3.00668200 |
| C | 1.20654200  | -5.11563500 | -2.13975100 |
| H | 2.78062300  | -3.67870800 | -2.04907100 |
| C | 1.85839900  | -4.02847900 | -1.60080500 |
| H | 3.39472100  | 4.82504700  | -5.03775700 |
| H | 1.44980800  | 0.40279400  | 7.49163700  |
| H | 7.61057100  | 0.84367900  | 1.82210900  |
| H | -1.28728500 | -3.37294100 | -4.45802400 |
| H | 1.49322500  | 3.35709800  | -5.68063100 |
| H | 4.68264300  | 4.33637600  | -2.96420700 |
| H | 1.75795600  | 2.44731900  | 6.10658900  |
| H | 1.34187400  | -1.82532600 | 6.39535000  |
| H | -2.07150200 | -2.46503900 | -2.28999300 |
| H | 0.85095800  | -2.56184000 | -5.44511800 |
| H | 6.63492500  | -1.18313700 | 2.88246700  |
| H | 6.12286400  | 2.51195600  | 0.73417400  |
| C | -2.35519300 | 1.54193400  | -0.97076900 |
| C | -3.76717300 | -0.16290600 | -2.41681800 |
| C | -2.27181600 | 1.09689900  | 0.44626400  |
| C | -4.48132400 | -1.00349000 | -1.52973400 |
| C | -3.20030600 | 0.19946900  | 1.04710100  |
| C | -5.02295600 | -2.21136300 | 1.17956900  |
| C | -6.00350900 | -2.44388500 | 2.15920700  |
| C | -4.13244100 | -3.26752100 | 0.89431100  |
| C | -6.09276400 | -3.66915100 | 2.82716600  |
| H | -6.71551300 | -1.66609800 | 2.41457100  |
| C | -4.21466500 | -4.49220400 | 1.55658000  |
| H | -3.36812900 | -3.13321800 | 0.13212700  |
| C | -5.19727300 | -4.69622200 | 2.52940400  |
| H | -6.86406400 | -3.81947700 | 3.57772400  |
| H | -3.51962600 | -5.29197400 | 1.31175800  |
| H | -5.26646900 | -5.64957800 | 3.04595400  |

|    |             |             |             |
|----|-------------|-------------|-------------|
| C  | -6.21148700 | 0.67020000  | 0.42752700  |
| C  | -7.52023000 | -0.00940700 | -0.02990800 |
| C  | -6.35420000 | 1.19038000  | 1.87422800  |
| C  | -5.94515900 | 1.88392700  | -0.49205600 |
| H  | -7.44457900 | -0.36987200 | -1.06288200 |
| H  | -7.79346400 | -0.86263100 | 0.59972900  |
| H  | -8.35147900 | 0.70858500  | 0.00841000  |
| H  | -5.44422400 | 1.70142200  | 2.21045500  |
| H  | -7.18108400 | 1.91210000  | 1.93238600  |
| H  | -6.56854100 | 0.39492900  | 2.59575900  |
| H  | -6.77383900 | 2.60122200  | -0.40797800 |
| H  | -5.02293100 | 2.40995800  | -0.22129400 |
| H  | -5.86513200 | 1.59135000  | -1.54438200 |
| C  | -2.09539100 | 0.48565800  | 3.22917200  |
| H  | -2.04471900 | 0.25910900  | 4.29093200  |
| C  | -1.22956600 | 1.66566100  | 1.26677800  |
| C  | -1.19385100 | 1.36163600  | 2.64044000  |
| H  | -0.44315300 | 1.84007700  | 3.25877200  |
| C  | -3.06376100 | -0.10079100 | 2.41823600  |
| H  | -3.75887800 | -0.80040500 | 2.87318200  |
| H  | -1.01540700 | 3.03147000  | 1.20731800  |
| C  | -3.76806600 | -0.47437200 | -3.79625900 |
| H  | -3.22531400 | 0.17197500  | -4.48107400 |
| C  | -5.12480800 | -2.13901600 | -2.05596300 |
| C  | -5.08837600 | -2.44952200 | -3.41549000 |
| H  | -5.59996300 | -3.33302100 | -3.78696700 |
| C  | -4.40938500 | -1.60172400 | -4.29281700 |
| H  | -4.37989200 | -1.81770900 | -5.35712800 |
| H  | -5.67447100 | -2.79471800 | -1.38705700 |
| Pd | 0.70488800  | 1.44529100  | 0.18146700  |
| C  | -1.55238200 | 2.76286100  | -1.30758300 |
| C  | -0.17239000 | 2.79637900  | -1.06979800 |
| C  | -2.18167700 | 3.88606100  | -1.87284400 |
| C  | 0.56272900  | 3.93421500  | -1.41950800 |
| C  | -1.44797700 | 5.02755400  | -2.20557700 |
| H  | -3.25647800 | 3.86433500  | -2.03369900 |
| C  | -0.06824100 | 5.04868900  | -1.98637700 |
| H  | 1.63537500  | 3.96753700  | -1.25719100 |
| H  | -1.95029100 | 5.88948000  | -2.63591100 |
| H  | 0.51868900  | 5.92337500  | -2.25486800 |
| Si | -4.74782500 | -0.56899600 | 0.27223900  |
| C  | -2.98708100 | 1.02273500  | -2.06527500 |
| H  | -2.77560500 | 1.60270000  | -2.96074900 |
| N  | -0.96863200 | 4.35076500  | 1.42406600  |

|   |             |            |            |
|---|-------------|------------|------------|
| C | -2.09828400 | 4.74075500 | 2.29694000 |
| C | 0.38485200  | 4.62104600 | 1.95343100 |
| H | -1.07027500 | 4.77312300 | 0.49876800 |
| H | -1.99539900 | 5.79102700 | 2.59818000 |
| H | -2.02521800 | 4.12464100 | 3.20039800 |
| H | 1.06140200  | 3.90897100 | 1.46047500 |
| H | 0.37284300  | 4.37172300 | 3.02003900 |
| C | 0.85617100  | 6.05403900 | 1.72022400 |
| H | 0.19948300  | 6.78100300 | 2.20984900 |
| H | 1.86669800  | 6.19120700 | 2.11936600 |
| H | 0.88025700  | 6.27566000 | 0.64749500 |
| C | -3.43099600 | 4.49851400 | 1.59482100 |
| H | -3.55328500 | 3.44015200 | 1.34952000 |
| H | -4.25799200 | 4.79928400 | 2.24495100 |
| H | -3.49996100 | 5.07441100 | 0.66522800 |

### INT23

|   |             |             |             |
|---|-------------|-------------|-------------|
| P | 0.94116000  | -1.26526800 | 1.14001700  |
| P | 2.69519200  | 1.37249600  | -0.28582600 |
| C | 3.90561900  | 5.59516900  | 1.22802100  |
| C | 4.11924900  | 5.27189100  | -0.11243300 |
| C | 3.81030800  | 3.99466300  | -0.59022900 |
| C | 3.27544900  | 3.02835500  | 0.27024000  |
| C | 3.05936100  | 3.36395100  | 1.61970200  |
| C | 3.37972400  | 4.63347500  | 2.09765700  |
| H | 3.96501500  | 3.76372600  | -1.63862200 |
| H | 2.62862900  | 2.62712800  | 2.29333600  |
| C | -2.14067400 | -4.52351600 | 2.36741000  |
| C | -2.17299800 | -3.25061300 | 2.93951600  |
| C | -1.27675000 | -2.26882400 | 2.51592500  |
| C | -0.33398400 | -2.54444400 | 1.51578500  |
| C | -0.30469100 | -3.83115000 | 0.95033300  |
| C | -1.20639400 | -4.80946400 | 1.37007100  |
| H | -1.31423900 | -1.28696100 | 2.96816500  |
| H | 0.41886200  | -4.07555600 | 0.17991000  |
| C | 4.02279700  | -2.17850800 | 4.48332300  |
| C | 3.60564400  | -0.86988200 | 4.23580400  |
| C | 2.68924900  | -0.61289400 | 3.21545600  |
| C | 2.18714900  | -1.65922600 | 2.43108500  |
| C | 2.59660800  | -2.97465600 | 2.69961100  |
| C | 3.51477900  | -3.22990700 | 3.71539500  |
| H | 2.36707300  | 0.40459800  | 3.01178300  |
| H | 2.20315600  | -3.79808600 | 2.11247100  |
| C | 3.00001300  | 1.15582700  | -4.89826100 |



|   |             |             |             |
|---|-------------|-------------|-------------|
| C | 4.16164500  | 1.30269800  | -4.13517700 |
| C | 4.07793300  | 1.38905700  | -2.74688600 |
| C | 2.82709700  | 1.34316800  | -2.10980000 |
| C | 1.66523600  | 1.19393600  | -2.88058100 |
| C | 1.75537500  | 1.10083700  | -4.26946800 |
| H | 4.98603600  | 1.46485700  | -2.15469100 |
| H | 0.69856400  | 1.12815800  | -2.39601900 |
| H | 5.67012000  | -5.37502800 | 0.72621500  |
| C | 3.95436400  | -1.13794100 | -0.00595000 |
| C | 4.03529800  | 0.22549600  | 0.28319100  |
| C | 5.08840400  | 0.70715800  | 1.10745900  |
| H | 5.17206100  | 1.76803700  | 1.31077200  |
| C | 6.00468200  | -0.15467600 | 1.66054600  |
| H | 6.79903900  | 0.22972400  | 2.29547900  |
| C | 5.92899600  | -1.54893800 | 1.42440400  |
| C | 4.90333300  | -2.04752800 | 0.55835500  |
| H | 4.07057100  | -3.83773100 | -0.33698700 |
| C | 4.84063700  | -3.44895600 | 0.32010000  |
| C | 5.73539100  | -4.30769100 | 0.91758200  |
| H | 7.43997600  | -4.50168700 | 2.24784200  |
| C | 6.74186900  | -3.81204100 | 1.78214400  |
| H | 7.60720200  | -2.07074600 | 2.68574100  |
| C | 6.83618100  | -2.46090700 | 2.02622100  |
| H | 4.20576000  | -2.92533500 | -5.96433500 |
| C | 0.90115500  | -2.38646000 | -2.78944400 |
| H | 0.12443800  | -2.65066400 | -3.50057200 |
| C | 0.56215700  | -2.08431800 | -1.49557100 |
| H | -0.48361000 | -2.09775500 | -1.20646200 |
| C | 1.56434500  | -1.76128700 | -0.53111300 |
| C | 2.89403500  | -1.65428100 | -0.92976800 |
| C | 3.26681600  | -1.98416800 | -2.27914000 |
| C | 2.25389100  | -2.36958100 | -3.21439700 |
| H | 1.83660200  | -2.99247700 | -5.24185000 |
| C | 2.61897100  | -2.70312000 | -4.54455600 |
| C | 3.93529700  | -2.66335700 | -4.94546100 |
| H | 5.97678400  | -2.24202700 | -4.34853500 |
| C | 4.93960400  | -2.27697200 | -4.02734500 |
| H | 5.39584000  | -1.63791100 | -2.04424100 |
| C | 4.61471000  | -1.93913400 | -2.73209200 |
| H | 4.14857400  | 6.58809200  | 1.59556400  |
| H | -2.83628800 | -5.29026600 | 2.69648400  |
| H | 4.74065900  | -2.38092800 | 5.27300000  |
| H | 3.06871200  | 1.07220100  | -5.97903200 |
| H | 4.52563300  | 6.01452000  | -0.79320100 |

|   |             |             |             |
|---|-------------|-------------|-------------|
| H | 3.22022100  | 4.87386000  | 3.14570800  |
| H | -2.90448700 | -3.01311800 | 3.70647600  |
| H | -1.17277700 | -5.79778000 | 0.92035400  |
| H | 0.85120000  | 0.97291600  | -4.85819000 |
| H | 5.13310800  | 1.32847900  | -4.62004100 |
| H | 3.84128400  | -4.24843900 | 3.90213000  |
| H | 3.99728700  | -0.04927500 | 4.83040800  |
| C | -2.14583200 | 1.05186300  | -1.11019000 |
| C | -3.03651700 | -0.93584100 | -2.49009100 |
| C | -2.50496500 | 0.72952700  | 0.30301500  |
| C | -4.15068000 | -1.43679900 | -1.76845900 |
| C | -3.79858700 | 0.32361900  | 0.71495100  |
| C | -6.00364600 | -1.72325200 | 0.60728400  |
| C | -7.39643100 | -1.81558000 | 0.77022400  |
| C | -5.20993000 | -2.68043600 | 1.27357100  |
| C | -7.97378100 | -2.80904700 | 1.56691000  |
| H | -8.05539200 | -1.11297500 | 0.27205200  |
| C | -5.77873700 | -3.67355300 | 2.06888300  |
| H | -4.12874800 | -2.65249400 | 1.16916000  |
| C | -7.16641300 | -3.73991400 | 2.22027100  |
| H | -9.05435800 | -2.85437500 | 1.67333800  |
| H | -5.13968700 | -4.39712600 | 2.56777100  |
| H | -7.61394400 | -4.51306200 | 2.83906300  |
| C | -6.24176700 | 0.86418500  | -1.23700500 |
| C | -7.20810000 | 0.18957800  | -2.23520600 |
| C | -7.03440700 | 1.60215600  | -0.13511100 |
| C | -5.41142100 | 1.91243000  | -2.00656000 |
| H | -6.66091900 | -0.31365800 | -3.04084600 |
| H | -7.85516100 | -0.55612800 | -1.76258100 |
| H | -7.86035800 | 0.94430800  | -2.69706000 |
| H | -6.36518400 | 2.09690900  | 0.57927100  |
| H | -7.66833400 | 2.37951900  | -0.58506400 |
| H | -7.68853400 | 0.93888300  | 0.43792300  |
| H | -6.07832900 | 2.67303200  | -2.43790900 |
| H | -4.69906600 | 2.42639600  | -1.35253300 |
| H | -4.84534700 | 1.46189400  | -2.82857600 |
| C | -3.16451000 | 0.79078200  | 3.03545000  |
| H | -3.43513300 | 0.85786600  | 4.08682600  |
| C | -1.49621400 | 0.97596300  | 1.26845400  |
| C | -1.84393400 | 1.02653900  | 2.62523200  |
| H | -1.07590500 | 1.21560500  | 3.37428900  |
| C | -4.10393500 | 0.38320500  | 2.09179800  |
| H | -5.09462300 | 0.09031500  | 2.42773400  |
| H | -1.85531800 | 3.03656700  | 1.66322000  |

|    |             |             |             |
|----|-------------|-------------|-------------|
| C  | -2.51510500 | -1.68941300 | -3.56217800 |
| H  | -1.68720300 | -1.27771100 | -4.13458200 |
| C  | -4.65011100 | -2.70402000 | -2.12517200 |
| C  | -4.09814700 | -3.45696900 | -3.16131700 |
| H  | -4.51401800 | -4.42968900 | -3.40859500 |
| C  | -3.02625800 | -2.94019600 | -3.89138700 |
| H  | -2.59920300 | -3.50310600 | -4.71717900 |
| H  | -5.49792200 | -3.11081800 | -1.58191500 |
| Pd | 0.43397600  | 1.05212000  | 0.58391900  |
| C  | -1.45436400 | 2.38009300  | -1.23660100 |
| C  | -0.30289400 | 2.67415500  | -0.47069000 |
| C  | -2.00096500 | 3.35133100  | -2.09417900 |
| C  | 0.24287900  | 3.96448700  | -0.57645400 |
| C  | -1.44709800 | 4.63106500  | -2.17800300 |
| H  | -2.88036500 | 3.10626500  | -2.68176900 |
| C  | -0.32548900 | 4.94202200  | -1.40768100 |
| H  | 1.12134900  | 4.23053300  | -0.00100000 |
| H  | -1.89040100 | 5.37406700  | -2.83515700 |
| H  | 0.12061700  | 5.93265100  | -1.45966400 |
| Si | -5.07986900 | -0.45084400 | -0.45000900 |
| C  | -2.38580300 | 0.35713600  | -2.24598400 |
| H  | -1.96503600 | 0.80175200  | -3.14809300 |
| N  | -1.79273100 | 4.07300100  | 1.73299600  |
| C  | -3.14210400 | 4.62120300  | 2.08705000  |
| C  | -0.64979700 | 4.38115900  | 2.66049200  |
| H  | -1.51677600 | 4.36898900  | 0.78495400  |
| H  | -3.05982700 | 5.70996600  | 2.12034800  |
| H  | -3.37484600 | 4.25458500  | 3.09064600  |
| H  | 0.16126100  | 3.72119700  | 2.34067700  |
| H  | -0.96817900 | 4.08177800  | 3.66272000  |
| C  | -0.22684200 | 5.84148300  | 2.59249400  |
| H  | -1.00502400 | 6.52081800  | 2.95322100  |
| H  | 0.65959200  | 5.98539600  | 3.21679900  |
| H  | 0.04223400  | 6.11792900  | 1.56762400  |
| C  | -4.16892100 | 4.15263300  | 1.06400700  |
| H  | -4.24811500 | 3.06161000  | 1.06820500  |
| H  | -5.15023300 | 4.56931100  | 1.30765500  |
| H  | -3.89777300 | 4.47629900  | 0.05308300  |

**INT24**

|   |             |             |             |
|---|-------------|-------------|-------------|
| C | -2.37670500 | -1.92879100 | 1.12632200  |
| C | -3.12510500 | -1.08715400 | 2.06698300  |
| C | -2.43840600 | -0.73429400 | -1.16812600 |
| C | -4.28271300 | -0.33405900 | 1.74204500  |

|    |             |             |             |
|----|-------------|-------------|-------------|
| C  | -3.74861100 | -0.20850700 | -1.29590400 |
| H  | -1.93543600 | -2.80196600 | 1.60641000  |
| C  | -2.66826800 | -1.09897900 | 3.40243300  |
| H  | -1.77857800 | -1.67407700 | 3.64733400  |
| C  | -3.30527000 | -0.36948600 | 4.39964800  |
| H  | -2.92700100 | -0.39813300 | 5.41887700  |
| C  | -4.90669000 | 0.39707700  | 2.77172400  |
| C  | -4.43350700 | 0.39095200  | 4.08364600  |
| H  | -5.79271700 | 0.98241900  | 2.54314300  |
| H  | -4.94810400 | 0.96157600  | 4.85237400  |
| C  | -1.43294500 | -0.34602300 | -2.08926600 |
| C  | -4.05445400 | 0.54775900  | -2.44755200 |
| C  | -3.10143900 | 0.79286700  | -3.43170200 |
| C  | -1.77917400 | 0.38697200  | -3.22474900 |
| H  | -1.01141400 | 0.67682500  | -3.93784300 |
| H  | -3.37058600 | 1.34878300  | -4.32700400 |
| H  | -5.05546400 | 0.95368600  | -2.56829700 |
| C  | -2.07344400 | -1.80199300 | -0.18896200 |
| C  | -1.27519500 | -2.89616100 | -0.82895200 |
| C  | -0.16069000 | -2.56478300 | -1.62302500 |
| C  | -1.66092500 | -4.23726100 | -0.68428600 |
| C  | 0.49283000  | -3.58067500 | -2.32678800 |
| H  | -2.51781700 | -4.48422100 | -0.06273700 |
| H  | 1.33441100  | -3.34429400 | -2.96994200 |
| C  | 0.08885000  | -4.91593300 | -2.20041500 |
| C  | -0.97512700 | -5.24799500 | -1.36204100 |
| H  | -1.28929900 | -6.28318500 | -1.25370800 |
| H  | 0.61249400  | -5.69169500 | -2.75520400 |
| Si | -5.07985000 | -0.36176300 | 0.02623300  |
| C  | -6.16512800 | -1.93282300 | -0.20602700 |
| C  | -6.76264300 | -1.95970000 | -1.63003800 |
| C  | -5.29117100 | -3.19511800 | -0.03964000 |
| C  | -7.28529500 | -1.97381300 | 0.85462500  |
| H  | -7.43194700 | -1.11647500 | -1.82975000 |
| H  | -5.97432800 | -1.94151800 | -2.39165400 |
| H  | -7.34562200 | -2.88097600 | -1.77552700 |
| H  | -4.83710800 | -3.25027100 | 0.95562500  |
| H  | -5.91052400 | -4.09435100 | -0.17528400 |
| H  | -4.48407100 | -3.23318200 | -0.77857900 |
| H  | -7.88650400 | -2.88725000 | 0.73577500  |
| H  | -6.87104000 | -1.98016100 | 1.87016900  |
| H  | -7.96781900 | -1.12011700 | 0.78332900  |
| C  | -6.07712600 | 1.25625300  | -0.08732100 |
| C  | -5.37662600 | 2.44845400  | 0.19147300  |

|   |             |             |             |
|---|-------------|-------------|-------------|
| C | -7.42565800 | 1.38165100  | -0.45901900 |
| C | -5.98570300 | 3.69943400  | 0.09957400  |
| H | -4.33259800 | 2.39650300  | 0.49205300  |
| C | -8.04648800 | 2.63180400  | -0.55411100 |
| H | -8.01469000 | 0.49856100  | -0.68219700 |
| C | -7.32848100 | 3.79468800  | -0.27722300 |
| H | -5.41333800 | 4.59715600  | 0.32089900  |
| H | -9.09206300 | 2.69328100  | -0.84576400 |
| H | -7.80933200 | 4.76675500  | -0.35162100 |
| P | 2.59944700  | -1.34804400 | -0.46002400 |
| P | 0.96990100  | 1.72183800  | -0.96664400 |
| C | -2.07908500 | 5.13126400  | -1.90403100 |
| C | -0.70931000 | 5.38470300  | -1.99100700 |
| C | 0.21277600  | 4.37805400  | -1.70153800 |
| C | -0.21929700 | 3.09916800  | -1.31003200 |
| C | -1.60230900 | 2.85508000  | -1.23418100 |
| C | -2.52172000 | 3.86338500  | -1.52650900 |
| H | 1.27005000  | 4.59643600  | -1.79342800 |
| H | -1.97155200 | 1.87371100  | -0.96484300 |
| C | 4.65491300  | -4.00454400 | -3.66580400 |
| C | 4.27050800  | -4.57953000 | -2.45465500 |
| C | 3.69987300  | -3.79513600 | -1.44897200 |
| C | 3.50850200  | -2.42139500 | -1.64506800 |
| C | 3.88488000  | -1.85286000 | -2.87497900 |
| C | 4.46244400  | -2.63508000 | -3.87294400 |
| H | 3.38101200  | -4.26339900 | -0.52493300 |
| H | 3.72740100  | -0.79217800 | -3.04761500 |
| C | 2.09816600  | -3.77161300 | 3.46192500  |
| C | 3.36761400  | -3.63540900 | 2.89219500  |
| C | 3.52557100  | -2.91859300 | 1.70745700  |
| C | 2.41113400  | -2.34878700 | 1.06935700  |
| C | 1.14539200  | -2.47885500 | 1.65183400  |
| C | 0.99231000  | -3.18761900 | 2.84447600  |
| H | 4.51627600  | -2.79743300 | 1.27711200  |
| H | 0.28747000  | -2.01318000 | 1.18349800  |
| C | 4.91403200  | 3.32782900  | -2.79754800 |
| C | 4.48768900  | 3.84295400  | -1.57089300 |
| C | 3.30582400  | 3.38148900  | -0.99122900 |
| C | 2.54850600  | 2.38494400  | -1.62203200 |
| C | 2.97911700  | 1.87928600  | -2.85782600 |
| C | 4.15433500  | 2.35095800  | -3.44489100 |
| H | 2.98464800  | 3.78176600  | -0.03524700 |
| H | 2.38922200  | 1.11098600  | -3.35211100 |
| H | 3.54904800  | -1.06274900 | 5.47318500  |

|    |             |             |             |
|----|-------------|-------------|-------------|
| C  | 2.12021500  | 1.00100500  | 1.57560200  |
| C  | 1.05074600  | 1.57793400  | 0.88459100  |
| C  | -0.18863900 | 1.77409600  | 1.56177100  |
| H  | -1.01262300 | 2.24566100  | 1.04298900  |
| C  | -0.37636000 | 1.37232400  | 2.85823700  |
| H  | -1.33876900 | 1.51912000  | 3.33901500  |
| C  | 0.66465200  | 0.72950500  | 3.57172700  |
| C  | 1.93354200  | 0.55763500  | 2.93208500  |
| H  | 3.92980400  | -0.24861700 | 3.19491600  |
| C  | 2.96733100  | -0.08978300 | 3.66581000  |
| C  | 2.74993100  | -0.55083700 | 4.94443000  |
| H  | 1.33578400  | -0.74804400 | 6.58069600  |
| C  | 1.49261900  | -0.37850000 | 5.57089000  |
| H  | -0.50028700 | 0.39163900  | 5.35786600  |
| C  | 0.47337400  | 0.25266000  | 4.89549300  |
| H  | 7.17025800  | 4.48349000  | 2.51247200  |
| C  | 6.15611600  | 0.72197600  | 0.03975700  |
| H  | 7.17475000  | 0.65566900  | -0.33518600 |
| C  | 5.21116800  | -0.18561800 | -0.36800300 |
| H  | 5.49460500  | -0.96866500 | -1.06096100 |
| C  | 3.87000200  | -0.11799600 | 0.10247900  |
| C  | 3.50307400  | 0.88168500  | 1.00087800  |
| C  | 4.48334400  | 1.83483000  | 1.44436800  |
| C  | 5.82317300  | 1.75784800  | 0.94666500  |
| H  | 7.79174900  | 2.65213200  | 0.96299900  |
| C  | 6.77915500  | 2.72669400  | 1.35255900  |
| C  | 6.43274500  | 3.74441500  | 2.21170600  |
| H  | 4.83732600  | 4.63114600  | 3.38558600  |
| C  | 5.10865300  | 3.82707600  | 2.70701200  |
| H  | 3.15257500  | 2.97485800  | 2.72367400  |
| C  | 4.16260100  | 2.89626900  | 2.33854000  |
| H  | -2.79667800 | 5.91288400  | -2.13985500 |
| H  | 5.09416100  | -4.61806800 | -4.44767500 |
| H  | 1.97606800  | -4.32210800 | 4.39090700  |
| H  | 5.83687200  | 3.68580200  | -3.24603300 |
| H  | -0.35171800 | 6.36637000  | -2.29094200 |
| H  | -3.58248800 | 3.64110500  | -1.47917800 |
| H  | 4.40359900  | -5.64537400 | -2.29006700 |
| H  | 4.75230600  | -2.17877400 | -4.81570400 |
| H  | 4.47888700  | 1.95083700  | -4.40179000 |
| H  | 5.08081200  | 4.59199500  | -1.05410500 |
| H  | 0.00593700  | -3.27929000 | 3.29023300  |
| H  | 4.23432800  | -4.07772600 | 3.37634000  |
| Pd | 0.49215900  | -0.62325100 | -1.47126400 |

**TS17**

|    |             |             |             |
|----|-------------|-------------|-------------|
| C  | -2.38198900 | -1.99047900 | 1.24536700  |
| C  | -3.13107700 | -1.11103200 | 2.14567600  |
| C  | -2.44505700 | -0.93725000 | -1.12965900 |
| C  | -4.22044500 | -0.27936200 | 1.77183800  |
| C  | -3.70156200 | -0.32003300 | -1.28069500 |
| H  | -1.91218200 | -2.82291800 | 1.76806600  |
| C  | -2.72719400 | -1.13735100 | 3.49861800  |
| H  | -1.89301000 | -1.77267700 | 3.78521100  |
| C  | -3.34083300 | -0.34639200 | 4.46270100  |
| H  | -3.00425300 | -0.39140000 | 5.49554300  |
| C  | -4.81343200 | 0.52142900  | 2.76653500  |
| C  | -4.38778600 | 0.50106900  | 4.09484300  |
| H  | -5.64082500 | 1.17167900  | 2.49696800  |
| H  | -4.87886800 | 1.12664700  | 4.83553100  |
| C  | -1.46064200 | -0.82275900 | -2.15571600 |
| C  | -3.99575400 | 0.29848900  | -2.51738900 |
| C  | -3.08500300 | 0.28028900  | -3.57265200 |
| C  | -1.80834500 | -0.26150900 | -3.38896100 |
| H  | -1.07552200 | -0.21101300 | -4.18934600 |
| H  | -3.35193600 | 0.72538300  | -4.52846000 |
| H  | -4.96036100 | 0.77947800  | -2.65651600 |
| C  | -2.07902400 | -1.91942300 | -0.07500600 |
| C  | -1.22199100 | -2.96239700 | -0.70191800 |
| C  | -0.39376800 | -2.49541700 | -1.74736400 |
| C  | -1.29920700 | -4.32665700 | -0.42064400 |
| C  | 0.27409700  | -3.42114900 | -2.55916300 |
| H  | -1.95200100 | -4.67895100 | 0.37455300  |
| H  | 0.90853000  | -3.08233300 | -3.37327700 |
| C  | 0.17778700  | -4.79021100 | -2.28018100 |
| C  | -0.58630900 | -5.24351000 | -1.20258400 |
| H  | -0.66001700 | -6.30712900 | -0.99223200 |
| H  | 0.71937100  | -5.49980400 | -2.90127900 |
| Si | -5.01935500 | -0.30336500 | 0.05959300  |
| C  | -6.18800100 | -1.82229800 | -0.10862000 |
| C  | -6.83361000 | -1.84252900 | -1.51122400 |
| C  | -5.36600200 | -3.12037600 | 0.05619500  |
| C  | -7.27468300 | -1.79457600 | 0.98686600  |
| H  | -7.46329100 | -0.96726500 | -1.70294100 |
| H  | -6.07248500 | -1.87993500 | -2.29931900 |
| H  | -7.46919400 | -2.73356200 | -1.61967300 |
| H  | -4.90124400 | -3.18611400 | 1.04568800  |
| H  | -6.02567100 | -3.99288200 | -0.06119700 |

|   |             |             |             |
|---|-------------|-------------|-------------|
| H | -4.57013200 | -3.20154500 | -0.69225300 |
| H | -7.91712700 | -2.68358100 | 0.90491200  |
| H | -6.83031800 | -1.79825600 | 1.98941400  |
| H | -7.92354400 | -0.91472500 | 0.91820800  |
| C | -5.90944400 | 1.36444500  | -0.12321000 |
| C | -5.10881000 | 2.51793700  | 0.00446800  |
| C | -7.27556600 | 1.55834700  | -0.38722400 |
| C | -5.64077400 | 3.80004200  | -0.12936400 |
| H | -4.04546400 | 2.41350700  | 0.20686700  |
| C | -7.81890900 | 2.84001400  | -0.52134400 |
| H | -7.93745500 | 0.70541700  | -0.49340700 |
| C | -7.00312600 | 3.96451200  | -0.39406300 |
| H | -4.99032900 | 4.66591700  | -0.03370800 |
| H | -8.88008700 | 2.95695700  | -0.72687600 |
| H | -7.42421800 | 4.96109500  | -0.50009100 |
| P | 2.57905600  | -1.34544300 | -0.40186700 |
| P | 0.98077600  | 1.72750800  | -1.03223100 |
| C | -2.13560900 | 5.01947400  | -2.10771400 |
| C | -0.80189000 | 5.38877100  | -1.91422000 |
| C | 0.15266700  | 4.42822500  | -1.57836400 |
| C | -0.21596900 | 3.08208800  | -1.41980000 |
| C | -1.55867900 | 2.72241500  | -1.61674000 |
| C | -2.51096200 | 3.68367200  | -1.96092300 |
| H | 1.18654400  | 4.73167500  | -1.45657100 |
| H | -1.86075300 | 1.68924800  | -1.50753400 |
| C | 4.49209900  | -4.00672600 | -3.68873800 |
| C | 3.97590600  | -4.60238400 | -2.53832200 |
| C | 3.45647200  | -3.81626300 | -1.50631900 |
| C | 3.45121100  | -2.41886200 | -1.61165900 |
| C | 3.95489100  | -1.82731500 | -2.78537700 |
| C | 4.48028500  | -2.61315200 | -3.80887500 |
| H | 3.03745600  | -4.29706400 | -0.62943200 |
| H | 3.94038300  | -0.74614700 | -2.89279400 |
| C | 2.09154500  | -3.79108800 | 3.50995200  |
| C | 3.34615000  | -3.72241400 | 2.89613200  |
| C | 3.50215400  | -3.01002500 | 1.70818800  |
| C | 2.40137000  | -2.37029300 | 1.11520900  |
| C | 1.15076600  | -2.43645800 | 1.74031700  |
| C | 0.99857100  | -3.14476000 | 2.93330600  |
| H | 4.48058400  | -2.94709900 | 1.23910100  |
| H | 0.30589500  | -1.91622500 | 1.30528400  |
| C | 4.97572400  | 3.36129800  | -2.73125600 |
| C | 4.49961900  | 3.88200900  | -1.52572600 |
| C | 3.30045500  | 3.41482400  | -0.98728400 |



|   |             |             |             |
|---|-------------|-------------|-------------|
| C | 2.57193600  | 2.40977700  | -1.63860300 |
| C | 3.05629400  | 1.89515100  | -2.85092400 |
| C | 4.24919300  | 2.37150200  | -3.39720000 |
| H | 2.94838600  | 3.81161000  | -0.04079800 |
| H | 2.49543500  | 1.11228200  | -3.35606800 |
| H | 3.36725000  | -0.98868200 | 5.50390300  |
| C | 2.06000100  | 1.04316100  | 1.54726100  |
| C | 1.01113700  | 1.61250300  | 0.81760300  |
| C | -0.25672000 | 1.79616900  | 1.44659400  |
| H | -1.06926300 | 2.23947700  | 0.88261200  |
| C | -0.48506700 | 1.40662600  | 2.74039800  |
| H | -1.46615200 | 1.54273600  | 3.18630600  |
| C | 0.54095800  | 0.78715900  | 3.49808800  |
| C | 1.83049600  | 0.61256600  | 2.90144300  |
| H | 3.81573100  | -0.19768200 | 3.22994900  |
| C | 2.84061000  | -0.03090200 | 3.67143800  |
| C | 2.58529700  | -0.47952100 | 4.94750000  |
| H | 1.12402900  | -0.65198000 | 6.54486300  |
| C | 1.31114800  | -0.29605500 | 5.53520400  |
| H | -0.67304600 | 0.47313400  | 5.25456300  |
| C | 0.31276200  | 0.32771300  | 4.82218200  |
| H | 7.10274300  | 4.52220000  | 2.55488000  |
| C | 6.14875200  | 0.68969300  | 0.16718100  |
| H | 7.18106200  | 0.60173400  | -0.16356900 |
| C | 5.21192100  | -0.22466800 | -0.24369600 |
| H | 5.51385200  | -1.03662200 | -0.89500900 |
| C | 3.85330700  | -0.12696100 | 0.16823600  |
| C | 3.46117400  | 0.90523700  | 1.01931800  |
| C | 4.43430700  | 1.86085300  | 1.47213100  |
| C | 5.79026300  | 1.75938700  | 1.02464300  |
| H | 7.76308300  | 2.64226800  | 1.08176900  |
| C | 6.73823100  | 2.73447200  | 1.43384300  |
| C | 6.37042800  | 3.77913700  | 2.25107900  |
| H | 4.74381900  | 4.70684000  | 3.34804700  |
| C | 5.03162500  | 3.88306900  | 2.70048700  |
| H | 3.07011600  | 3.04153800  | 2.67554600  |
| C | 4.09207400  | 2.94775500  | 2.32652300  |
| H | -2.87535800 | 5.76750400  | -2.38149100 |
| H | 4.89424000  | -4.62056300 | -4.49018800 |
| H | 1.97181100  | -4.33889900 | 4.44095200  |
| H | 5.91235700  | 3.72252300  | -3.14751000 |
| H | -0.49988300 | 6.42636300  | -2.03242500 |
| H | -3.53970400 | 3.37781700  | -2.11859700 |
| H | 3.96823300  | -5.68478600 | -2.44050000 |

|    |            |             |             |
|----|------------|-------------|-------------|
| H  | 4.87476200 | -2.13873500 | -4.70375700 |
| H  | 4.61449100 | 1.96400600  | -4.33629400 |
| H  | 5.06840000 | 4.63760500  | -0.99126100 |
| H  | 0.02604700 | -3.18238000 | 3.41571100  |
| H  | 4.20266000 | -4.21652000 | 3.34741900  |
| Pd | 0.50167900 | -0.61837700 | -1.44896000 |

### 3

|    |             |             |             |
|----|-------------|-------------|-------------|
| C  | 1.54540400  | 1.83498900  | -0.26484400 |
| C  | 0.19893300  | 2.37665800  | -0.44192600 |
| C  | 1.47948500  | -0.76478400 | -0.21415000 |
| C  | -1.03639000 | 1.68388300  | -0.29662400 |
| C  | 0.14485800  | -1.18975700 | -0.10716600 |
| H  | 2.29469800  | 2.62480000  | -0.28593600 |
| C  | 0.16621000  | 3.73823700  | -0.82821800 |
| H  | 1.10690800  | 4.27355000  | -0.93372400 |
| C  | -1.02272000 | 4.40453900  | -1.09587700 |
| H  | -1.00404800 | 5.44913600  | -1.39489500 |
| C  | -2.22329100 | 2.38152100  | -0.58700400 |
| C  | -2.23250300 | 3.71941600  | -0.98125000 |
| H  | -3.17407800 | 1.86311000  | -0.49514900 |
| H  | -3.17398300 | 4.22090700  | -1.18859800 |
| C  | 2.53010700  | -1.71371000 | -0.35239300 |
| C  | -0.10017100 | -2.57513200 | -0.21988900 |
| C  | 0.93089500  | -3.50108100 | -0.39660500 |
| C  | 2.26047700  | -3.07467300 | -0.44949200 |
| H  | 3.06937000  | -3.79255600 | -0.55853200 |
| H  | 0.69726200  | -4.55974100 | -0.47366100 |
| H  | -1.12265000 | -2.93807000 | -0.16031000 |
| C  | 2.07810100  | 0.58626500  | -0.18457300 |
| C  | 3.54749800  | 0.37341100  | -0.20186600 |
| C  | 3.81231500  | -1.00814300 | -0.33459600 |
| C  | 4.60556200  | 1.27960500  | -0.13424600 |
| C  | 5.12021400  | -1.48410100 | -0.40651800 |
| H  | 4.42599900  | 2.34577500  | -0.02238100 |
| H  | 5.31872000  | -2.54769600 | -0.51102900 |
| C  | 6.17443100  | -0.56911600 | -0.33882700 |
| C  | 5.91759100  | 0.80103700  | -0.20111300 |
| H  | 6.74693200  | 1.50078600  | -0.14334700 |
| H  | 7.20067900  | -0.92251400 | -0.39081600 |
| Si | -1.26057400 | -0.05491300 | 0.40032300  |
| C  | -1.29434700 | 0.05298400  | 2.32315800  |
| C  | -1.59271000 | -1.33363900 | 2.93119800  |
| C  | 0.09900100  | 0.51324300  | 2.80905400  |

|   |             |             |             |
|---|-------------|-------------|-------------|
| C | -2.33372200 | 1.08595900  | 2.80898300  |
| H | -2.58223200 | -1.71101500 | 2.65086000  |
| H | -0.85226000 | -2.07766900 | 2.61393300  |
| H | -1.55826200 | -1.27999200 | 4.02910400  |
| H | 0.36777100  | 1.49632500  | 2.40637900  |
| H | 0.10295700  | 0.59150900  | 3.90597900  |
| H | 0.88678600  | -0.19209600 | 2.52390000  |
| H | -2.30194500 | 1.16175000  | 3.90561200  |
| H | -2.13008400 | 2.08289100  | 2.40168300  |
| H | -3.36011800 | 0.82160600  | 2.53268600  |
| C | -2.84532300 | -0.76729700 | -0.35533900 |
| C | -2.81140900 | -1.11666400 | -1.72080300 |
| C | -4.06258100 | -0.94373200 | 0.32530000  |
| C | -3.93716700 | -1.61661900 | -2.37517000 |
| H | -1.88524700 | -1.00401000 | -2.28008200 |
| C | -5.19493600 | -1.44499400 | -0.32289200 |
| H | -4.14036900 | -0.69163300 | 1.37758500  |
| C | -5.13516000 | -1.78215300 | -1.67539200 |
| H | -3.88016300 | -1.87849300 | -3.42869700 |
| H | -6.12193800 | -1.57231600 | 0.23055500  |
| H | -6.01458800 | -2.17245400 | -2.18117600 |

**TS18**

|    |             |             |             |
|----|-------------|-------------|-------------|
| C  | 1.24603800  | -2.26221700 | 1.03854500  |
| C  | 0.73291300  | -1.14799700 | 0.35521400  |
| C  | -0.64871400 | -0.93095000 | 0.21564700  |
| C  | -1.52131300 | -1.93631700 | 0.74370200  |
| C  | -0.99971900 | -3.03601200 | 1.45330300  |
| C  | 0.37321700  | -3.19251200 | 1.60497500  |
| Si | -1.26112600 | 0.54398700  | -0.81494300 |
| H  | 2.31876100  | -2.41560300 | 1.10848500  |
| H  | -1.68830900 | -3.77189800 | 1.85675500  |
| H  | 0.76880200  | -4.05217300 | 2.14000400  |
| C  | -0.00225000 | 1.95736800  | -0.62243500 |
| C  | -0.32979900 | 3.23162200  | -1.12116300 |
| C  | 1.26207200  | 1.78415700  | 0.00239000  |
| C  | 0.56428200  | 4.29861500  | -1.03458600 |
| H  | -1.29759300 | 3.40073500  | -1.58521000 |
| C  | 2.16452700  | 2.87881900  | 0.06757600  |
| H  | 1.23399500  | 1.23419400  | 1.19613900  |
| C  | 1.82141900  | 4.12429500  | -0.44222800 |
| H  | 0.28243100  | 5.27105500  | -1.43071600 |
| H  | 3.13620500  | 2.73400600  | 0.53428300  |
| H  | 2.51820900  | 4.95586900  | -0.38021300 |

|    |             |             |             |
|----|-------------|-------------|-------------|
| C  | -2.93141100 | -1.90690900 | 0.54598200  |
| C  | -4.13641100 | -1.94264100 | 0.38823000  |
| C  | -5.54395500 | -1.90194800 | 0.18578800  |
| C  | -6.34785100 | -3.02643400 | 0.45949900  |
| C  | -6.15089700 | -0.72166200 | -0.28965200 |
| C  | -7.72500800 | -2.96863100 | 0.26027300  |
| H  | -5.88079400 | -3.93608300 | 0.82483800  |
| C  | -7.52860800 | -0.67495600 | -0.48401800 |
| H  | -5.53360100 | 0.14451000  | -0.49506100 |
| C  | -8.32003400 | -1.79466800 | -0.21132500 |
| H  | -8.33626000 | -3.84158700 | 0.47268100  |
| H  | -7.98628800 | 0.24075900  | -0.84879700 |
| H  | -9.39491200 | -1.75355600 | -0.36537400 |
| Pd | 2.18353200  | -0.04505800 | -0.42727100 |
| O  | 3.48757200  | -1.72668600 | -1.17124400 |
| S  | 4.71689600  | -0.86194500 | -1.37079300 |
| O  | 4.30624900  | 0.58034600  | -1.24678900 |
| O  | 5.60490200  | -1.22464400 | -2.46613500 |
| C  | 5.67645500  | -1.18083400 | 0.19656300  |
| F  | 4.86929400  | -1.02787300 | 1.27024900  |
| F  | 6.69147800  | -0.32022500 | 0.30717400  |
| F  | 6.15119600  | -2.42802100 | 0.20478400  |
| C  | -2.86632400 | 1.29760500  | -0.14248800 |
| C  | -3.70415000 | 2.10349000  | -0.93580800 |
| C  | -3.19581100 | 1.17787500  | 1.21999600  |
| C  | -4.81142700 | 2.76461400  | -0.39587100 |
| H  | -3.50274600 | 2.21994500  | -1.99605400 |
| C  | -4.30302400 | 1.82631100  | 1.76687500  |
| H  | -2.58781900 | 0.54792300  | 1.86282300  |
| C  | -5.11462200 | 2.62678100  | 0.95929900  |
| H  | -5.43921900 | 3.37876500  | -1.03653200 |
| H  | -4.53800500 | 1.70063000  | 2.82065700  |
| H  | -5.97917300 | 3.13172800  | 1.38176500  |
| C  | -1.39957700 | -0.00223000 | -2.66545900 |
| C  | -1.35157400 | 1.19817500  | -3.63566300 |
| C  | -0.21443500 | -0.93176200 | -3.01038700 |
| C  | -2.71744300 | -0.78178900 | -2.87127700 |
| H  | -2.18501000 | 1.89617200  | -3.49668000 |
| H  | -0.41977400 | 1.76527300  | -3.53630800 |
| H  | -1.40986800 | 0.83504100  | -4.67144700 |
| H  | -0.19880800 | -1.83183800 | -2.38794900 |
| H  | -0.28922300 | -1.25013300 | -4.05981900 |
| H  | 0.75380900  | -0.43055400 | -2.88867000 |
| H  | -2.78788200 | -1.12309300 | -3.91399800 |

|   |             |             |             |
|---|-------------|-------------|-------------|
| H | -2.77303800 | -1.66584700 | -2.22767100 |
| H | -3.60115400 | -0.16894300 | -2.66159600 |
| N | 1.11671600  | 1.01252200  | 2.62975300  |
| C | 2.36720500  | 0.36075400  | 3.07297500  |
| C | 0.79300600  | 2.27733000  | 3.31718500  |
| H | 0.33992400  | 0.35161300  | 2.67888300  |
| H | 3.07760500  | 1.15643200  | 3.32137500  |
| H | 2.78021300  | -0.17790100 | 2.21356100  |
| H | 1.52344400  | 3.01655100  | 2.96591800  |
| H | 0.93026400  | 2.16735900  | 4.40249600  |
| C | -0.62243600 | 2.74443400  | 2.99837100  |
| H | -1.36833500 | 2.03247100  | 3.36835600  |
| H | -0.81618500 | 3.70931300  | 3.47768600  |
| H | -0.77027100 | 2.86036300  | 1.92140000  |
| C | 2.16691600  | -0.59358700 | 4.24814400  |
| H | 1.49563500  | -1.41132800 | 3.96040500  |
| H | 3.12402000  | -1.03440000 | 4.54679200  |
| H | 1.74185900  | -0.08163300 | 5.11933000  |

#### INT26

|    |             |             |             |
|----|-------------|-------------|-------------|
| C  | 1.02851300  | -2.29707000 | -1.71965500 |
| C  | 0.63560500  | -1.01308400 | -1.28453700 |
| C  | -0.71676700 | -0.75723400 | -0.97404200 |
| C  | -1.64306800 | -1.85084700 | -1.05132200 |
| C  | -1.21603300 | -3.13055800 | -1.45195900 |
| C  | 0.11186100  | -3.34390100 | -1.80241600 |
| Si | -1.32430100 | 1.02468000  | -0.75766600 |
| H  | 2.06623500  | -2.49464100 | -1.97055000 |
| H  | -1.94066000 | -3.93791200 | -1.49422600 |
| H  | 0.43890100  | -4.32659600 | -2.13285900 |
| C  | 0.13547700  | 2.14387600  | -0.34746400 |
| C  | -0.15616000 | 3.41724800  | 0.19257700  |
| C  | 1.48019300  | 1.82663300  | -0.60253500 |
| C  | 0.83827800  | 4.35412900  | 0.45637200  |
| H  | -1.18529600 | 3.67998900  | 0.42119900  |
| C  | 2.48644700  | 2.78338600  | -0.35462100 |
| H  | 1.83116000  | -0.16197100 | 1.10539700  |
| C  | 2.16807300  | 4.03620100  | 0.17114400  |
| H  | 0.57968000  | 5.32231300  | 0.87737200  |
| H  | 3.52657900  | 2.54623200  | -0.55401800 |
| H  | 2.96060400  | 4.75594100  | 0.36222500  |
| C  | -3.02512700 | -1.71748400 | -0.73086300 |
| C  | -4.20908900 | -1.67773300 | -0.45685600 |
| C  | -5.58321800 | -1.55367100 | -0.11118600 |

|    |             |             |             |
|----|-------------|-------------|-------------|
| C  | -6.50066500 | -2.58050900 | -0.41116800 |
| C  | -6.04138600 | -0.39277600 | 0.54475500  |
| C  | -7.84245100 | -2.44556200 | -0.06349300 |
| H  | -6.14902900 | -3.47444400 | -0.91743900 |
| C  | -7.38487900 | -0.26887700 | 0.88806000  |
| H  | -5.33594100 | 0.39535200  | 0.77864600  |
| C  | -8.28944300 | -1.29126700 | 0.58653900  |
| H  | -8.54224700 | -3.24225300 | -0.30089800 |
| H  | -7.72682800 | 0.63005000  | 1.39416100  |
| H  | -9.33725400 | -1.18966100 | 0.85579800  |
| Pd | 2.30135800  | 0.08622600  | -1.10523300 |
| O  | 3.90648500  | -1.75433900 | -0.82183700 |
| S  | 5.04620700  | -0.81249800 | -0.55844500 |
| O  | 4.62427000  | 0.58878000  | -0.89269000 |
| O  | 6.37600900  | -1.23393600 | -0.98138100 |
| C  | 5.11789400  | -0.78069200 | 1.31010700  |
| F  | 4.03459000  | -0.12125000 | 1.81217500  |
| F  | 6.20973900  | -0.15573500 | 1.74251700  |
| F  | 5.09004900  | -2.02305700 | 1.81349200  |
| C  | -2.49154400 | 1.14773100  | 0.74164400  |
| C  | -3.35092800 | 2.24317300  | 0.94632700  |
| C  | -2.43281300 | 0.18740600  | 1.77032900  |
| C  | -4.09139100 | 2.38766900  | 2.12373100  |
| H  | -3.45452200 | 3.00198800  | 0.17685800  |
| C  | -3.16986500 | 0.31811100  | 2.94786700  |
| H  | -1.83425100 | -0.71071300 | 1.63175500  |
| C  | -3.99912600 | 1.42717400  | 3.13205000  |
| H  | -4.74436800 | 3.24775900  | 2.24822200  |
| H  | -3.11045100 | -0.45119700 | 3.71379400  |
| H  | -4.57709300 | 1.53345300  | 4.04600100  |
| C  | -2.09886400 | 1.63297900  | -2.42236100 |
| C  | -2.20861800 | 3.17321600  | -2.46786000 |
| C  | -1.14082700 | 1.19013600  | -3.55299000 |
| C  | -3.49506000 | 1.02738700  | -2.66846400 |
| H  | -2.90718900 | 3.56929400  | -1.72137500 |
| H  | -1.24150700 | 3.66216500  | -2.31600400 |
| H  | -2.58816300 | 3.48196100  | -3.45238800 |
| H  | -1.07200800 | 0.09962800  | -3.62619100 |
| H  | -1.50453600 | 1.56935700  | -4.51872200 |
| H  | -0.12548700 | 1.57718200  | -3.40291800 |
| H  | -3.90629800 | 1.41419800  | -3.61231000 |
| H  | -3.46247700 | -0.06274300 | -2.74375000 |
| H  | -4.20153500 | 1.28015700  | -1.86878200 |
| N  | 1.23840400  | -0.66713000 | 1.80406300  |

|   |             |             |            |
|---|-------------|-------------|------------|
| C | 1.66506500  | -2.11710300 | 1.82394300 |
| C | 1.25421800  | 0.03592300  | 3.13044900 |
| H | 0.30663000  | -0.60385000 | 1.37450600 |
| H | 2.46863400  | -2.19480200 | 2.55859600 |
| H | 2.08966300  | -2.32513900 | 0.84097800 |
| H | 2.27380500  | -0.06462700 | 3.50761100 |
| H | 0.57909500  | -0.51535700 | 3.79139500 |
| C | 0.84695300  | 1.49664600  | 2.99202700 |
| H | -0.17613200 | 1.59234200  | 2.61974100 |
| H | 0.89990700  | 1.97251300  | 3.97635100 |
| H | 1.51168000  | 2.03471700  | 2.30996000 |
| C | 0.48708000  | -3.03141600 | 2.12616500 |
| H | -0.26278300 | -2.97015300 | 1.32967100 |
| H | 0.83682500  | -4.06700300 | 2.17336400 |
| H | 0.01270000  | -2.79464200 | 3.08540500 |

### TS19

|    |             |             |             |
|----|-------------|-------------|-------------|
| C  | 0.90416500  | -1.56820900 | -2.20103600 |
| C  | 0.41706300  | -0.59620500 | -1.31723500 |
| C  | -0.93014800 | -0.49589300 | -0.96253400 |
| C  | -1.84892700 | -1.32879600 | -1.66979000 |
| C  | -1.37311800 | -2.25920600 | -2.61671600 |
| C  | -0.01145400 | -2.39093300 | -2.86426100 |
| Si | -1.41280000 | 0.75683600  | 0.36910400  |
| H  | 1.97048900  | -1.71915600 | -2.34617300 |
| H  | -2.08990100 | -2.89111500 | -3.13208300 |
| H  | 0.34634200  | -3.14786500 | -3.55729100 |
| C  | 0.11627300  | 1.03257000  | 1.46467200  |
| C  | -0.10437900 | 1.64879600  | 2.71219400  |
| C  | 1.45498300  | 0.72716500  | 1.09991100  |
| C  | 0.94575300  | 1.96704300  | 3.57217400  |
| H  | -1.11932500 | 1.88025800  | 3.02437300  |
| C  | 2.51233700  | 1.07535100  | 1.97564700  |
| H  | 1.92166400  | -0.55550900 | 0.69706800  |
| C  | 2.26143600  | 1.67260700  | 3.20559300  |
| H  | 0.73671700  | 2.43698000  | 4.53004300  |
| H  | 3.52781200  | 0.81201400  | 1.70017500  |
| H  | 3.08490700  | 1.90056200  | 3.87757600  |
| C  | -3.25572800 | -1.24651100 | -1.46647200 |
| C  | -4.46210400 | -1.19773100 | -1.32396000 |
| C  | -5.86263500 | -1.11049600 | -1.08759500 |
| C  | -6.78992700 | -1.54724200 | -2.05442000 |
| C  | -6.33632000 | -0.58416300 | 0.13139900  |
| C  | -8.15729100 | -1.45574300 | -1.80579900 |

|    |             |             |             |
|----|-------------|-------------|-------------|
| H  | -6.42567200 | -1.95368100 | -2.99314600 |
| C  | -7.70539000 | -0.49809000 | 0.36928600  |
| H  | -5.62318500 | -0.25657900 | 0.87824100  |
| C  | -8.61996500 | -0.93133000 | -0.59522900 |
| H  | -8.86449400 | -1.79458600 | -2.55809800 |
| H  | -8.05931300 | -0.09327000 | 1.31377800  |
| H  | -9.68759700 | -0.86237800 | -0.40478700 |
| Pd | 1.78597500  | 0.79483300  | -0.99161700 |
| O  | 4.63057700  | -0.44273700 | 0.26899900  |
| S  | 3.92699800  | -1.73458400 | 0.10749700  |
| O  | 3.96327700  | -2.35164700 | -1.22269000 |
| O  | 2.52991900  | -1.72355900 | 0.74347200  |
| C  | 4.80192900  | -2.91171100 | 1.25328300  |
| F  | 6.07049800  | -3.05206200 | 0.85209200  |
| F  | 4.20229400  | -4.10391500 | 1.24020200  |
| F  | 4.78997800  | -2.42494500 | 2.49893700  |
| C  | -2.73054800 | 0.06938700  | 1.53826200  |
| C  | -3.59652200 | 0.88624900  | 2.28850400  |
| C  | -2.78746200 | -1.31814900 | 1.76930500  |
| C  | -4.47893300 | 0.34631600  | 3.22863900  |
| H  | -3.59489900 | 1.96226600  | 2.14369500  |
| C  | -3.67320600 | -1.86556000 | 2.69772800  |
| H  | -2.13820400 | -1.98342300 | 1.20611300  |
| C  | -4.52180100 | -1.03385200 | 3.43250700  |
| H  | -5.13597000 | 1.00309900  | 3.79335300  |
| H  | -3.70267900 | -2.94167700 | 2.84622800  |
| H  | -5.21203800 | -1.45896800 | 4.15636400  |
| C  | -1.93820000 | 2.42844500  | -0.46217200 |
| C  | -1.83317400 | 3.61727100  | 0.51748300  |
| C  | -1.00886200 | 2.72147100  | -1.65994300 |
| C  | -3.38639500 | 2.31596100  | -0.98845400 |
| H  | -2.48729500 | 3.50968400  | 1.38947700  |
| H  | -0.81120100 | 3.75120900  | 0.88869100  |
| H  | -2.12807500 | 4.54587500  | 0.00772400  |
| H  | -1.06208400 | 1.93559300  | -2.42103200 |
| H  | -1.29639800 | 3.67105600  | -2.13450700 |
| H  | 0.04171000  | 2.81504500  | -1.34898400 |
| H  | -3.67934900 | 3.25546700  | -1.47949600 |
| H  | -3.49108700 | 1.50927600  | -1.72089000 |
| H  | -4.10710000 | 2.12116200  | -0.18766500 |
| N  | 3.47653800  | 2.30159100  | -1.17352400 |
| C  | 4.16255000  | 2.13821300  | -2.48545300 |
| C  | 3.15410900  | 3.73245800  | -0.94020000 |
| H  | 4.11198400  | 1.96862800  | -0.44490700 |



|   |            |            |             |
|---|------------|------------|-------------|
| H | 5.06843400 | 2.76401900 | -2.50420100 |
| H | 3.48459000 | 2.53848100 | -3.24952800 |
| H | 2.42078600 | 4.01875100 | -1.70337600 |
| H | 4.05369600 | 4.34438900 | -1.11452000 |
| C | 2.59770900 | 4.02130200 | 0.44819300  |
| H | 3.30478500 | 3.73193800 | 1.23201200  |
| H | 2.40406800 | 5.09514600 | 0.54569100  |
| H | 1.66448400 | 3.48220700 | 0.62828000  |
| C | 4.52322000 | 0.69032100 | -2.80126000 |
| H | 3.63276700 | 0.05685800 | -2.89341600 |
| H | 5.06018500 | 0.64630000 | -3.75520000 |
| H | 5.14773700 | 0.25133800 | -2.02079100 |

### INT27

|    |             |             |             |
|----|-------------|-------------|-------------|
| C  | 0.90165100  | -2.20208600 | -1.39006100 |
| C  | 0.40364900  | -1.00907200 | -0.83547400 |
| C  | -0.97600500 | -0.83375000 | -0.60846200 |
| C  | -1.85960300 | -1.85081300 | -1.07385300 |
| C  | -1.34839100 | -3.03031500 | -1.65495300 |
| C  | 0.02140400  | -3.21095900 | -1.79333300 |
| Si | -1.55408700 | 0.76279000  | 0.24188600  |
| H  | 1.97130300  | -2.35838000 | -1.51316900 |
| H  | -2.04417000 | -3.79553900 | -1.98570700 |
| H  | 0.40978700  | -4.13361000 | -2.21764900 |
| C  | -0.08256700 | 1.34654300  | 1.28349000  |
| C  | -0.30647100 | 2.00317000  | 2.51260100  |
| C  | 1.24955200  | 1.12030700  | 0.90506200  |
| C  | 0.74718000  | 2.38756800  | 3.34053900  |
| H  | -1.32582400 | 2.19609300  | 2.83657200  |
| C  | 2.31632000  | 1.47327700  | 1.74397800  |
| H  | 2.39886000  | -0.96360200 | 0.61855300  |
| C  | 2.06102700  | 2.10808200  | 2.96168200  |
| H  | 0.54265100  | 2.88483700  | 4.28524700  |
| H  | 3.34281100  | 1.27454400  | 1.45303400  |
| H  | 2.89116600  | 2.38117800  | 3.60904100  |
| C  | -3.27614100 | -1.71451400 | -0.99768900 |
| C  | -4.48793400 | -1.62644500 | -0.95376600 |
| C  | -5.89709300 | -1.46554000 | -0.83578600 |
| C  | -6.78213400 | -2.17383800 | -1.67253500 |
| C  | -6.42268100 | -0.58795700 | 0.13449700  |
| C  | -8.15844500 | -2.00424400 | -1.54157400 |
| H  | -6.37815300 | -2.85046400 | -2.41964200 |
| C  | -7.80015400 | -0.42678500 | 0.25685700  |
| H  | -5.74267000 | -0.04949000 | 0.78359000  |

|    |             |             |             |
|----|-------------|-------------|-------------|
| C  | -8.67247400 | -1.13116500 | -0.57827100 |
| H  | -8.83245900 | -2.55451600 | -2.19271200 |
| H  | -8.19380700 | 0.25049000  | 1.01025100  |
| H  | -9.74689700 | -1.00193300 | -0.47883700 |
| Pd | 1.70011300  | 0.50824300  | -0.94902000 |
| O  | 4.90817200  | -0.02127800 | 0.15371700  |
| S  | 4.47083200  | -1.41731300 | 0.24861600  |
| O  | 4.47749700  | -2.25914700 | -0.94240800 |
| O  | 3.09860100  | -1.54877000 | 1.05609900  |
| C  | 5.52554800  | -2.24107800 | 1.54970900  |
| F  | 6.77437000  | -2.28140900 | 1.08229800  |
| F  | 5.08743500  | -3.47584700 | 1.77417700  |
| F  | 5.48923500  | -1.53145700 | 2.67423600  |
| C  | -2.93173200 | 0.42844600  | 1.50035800  |
| C  | -3.80143800 | 1.43501000  | 1.96017800  |
| C  | -3.03771900 | -0.83878000 | 2.10347700  |
| C  | -4.73788300 | 1.19010300  | 2.96902400  |
| H  | -3.75687900 | 2.43150200  | 1.53143300  |
| C  | -3.97602500 | -1.09475600 | 3.10376600  |
| H  | -2.38529100 | -1.64389600 | 1.77662600  |
| C  | -4.83101000 | -0.07989700 | 3.54034000  |
| H  | -5.39627100 | 1.98894900  | 3.30142700  |
| H  | -4.04251100 | -2.08784800 | 3.54042900  |
| H  | -5.56338500 | -0.27809700 | 4.31857700  |
| C  | -2.06550600 | 2.10259900  | -1.06310500 |
| C  | -1.92467000 | 3.52044300  | -0.46679400 |
| C  | -1.13803300 | 2.01413200  | -2.29431600 |
| C  | -3.51707400 | 1.87652500  | -1.53934300 |
| H  | -2.57457600 | 3.68423400  | 0.39996600  |
| H  | -0.89661700 | 3.72324300  | -0.14556500 |
| H  | -2.19679500 | 4.27358800  | -1.22091100 |
| H  | -1.19463000 | 1.03360300  | -2.77949600 |
| H  | -1.42305600 | 2.77648600  | -3.03470900 |
| H  | -0.08783600 | 2.18916200  | -2.02483900 |
| H  | -3.78853400 | 2.63707400  | -2.28640700 |
| H  | -3.64184000 | 0.89275700  | -2.00305800 |
| H  | -4.24161200 | 1.94253600  | -0.72161900 |
| N  | 3.19021600  | 2.07236000  | -1.69945100 |
| C  | 3.63631200  | 1.66198800  | -3.05848600 |
| C  | 2.79216500  | 3.50428300  | -1.71173600 |
| H  | 3.97454300  | 1.94698400  | -1.05566500 |
| H  | 4.45711400  | 2.31576800  | -3.39266300 |
| H  | 2.79230100  | 1.83920500  | -3.73582000 |
| H  | 1.91000300  | 3.58300900  | -2.35726700 |

|   |            |             |             |
|---|------------|-------------|-------------|
| H | 3.59141400 | 4.09635200  | -2.18642500 |
| C | 2.47986000 | 4.07376000  | -0.33401800 |
| H | 3.31671300 | 3.93122600  | 0.35883900  |
| H | 2.29342800 | 5.14975600  | -0.42182300 |
| H | 1.60061300 | 3.60199900  | 0.10740000  |
| C | 4.07350100 | 0.20301600  | -3.13087900 |
| H | 3.25645500 | -0.48626100 | -2.88041100 |
| H | 4.40050300 | -0.03529000 | -4.14877600 |
| H | 4.89591900 | -0.00499800 | -2.44338000 |

**TS20**

|    |             |             |             |
|----|-------------|-------------|-------------|
| C  | 1.78210200  | -1.25615200 | -0.79354300 |
| C  | 2.55889400  | -2.29379600 | -1.34649300 |
| C  | 0.48931100  | -1.10057200 | -1.34080900 |
| C  | 2.12690600  | -3.04919600 | -2.44241600 |
| H  | 3.54166100  | -2.50342100 | -0.94372700 |
| C  | 0.10784700  | -1.73725100 | -2.53008900 |
| C  | 0.92204800  | -2.73610200 | -3.07199000 |
| H  | 2.76167200  | -3.83791100 | -2.83597500 |
| H  | -0.83637200 | -1.49207300 | -3.00564300 |
| H  | 0.61521700  | -3.25894400 | -3.97372100 |
| C  | 2.41927400  | 1.55324600  | -1.15916900 |
| C  | 1.16457100  | 1.73374500  | -1.79848600 |
| C  | 3.46199400  | 2.38550200  | -1.58965600 |
| C  | 0.99626000  | 2.65187100  | -2.85186000 |
| C  | 3.29742600  | 3.31706900  | -2.61991600 |
| C  | 2.06652800  | 3.44264100  | -3.26194400 |
| H  | 0.02280600  | 2.75203000  | -3.32213300 |
| H  | 4.13617200  | 3.93731100  | -2.92220400 |
| H  | 1.93529900  | 4.15329700  | -4.07234800 |
| H  | 4.43401700  | 2.32002200  | -1.11709800 |
| Pd | -1.19440600 | -0.81304700 | -0.19774700 |
| Si | 2.61659300  | 0.18308500  | 0.15910800  |
| C  | -0.04217900 | 1.11276800  | -1.31692000 |
| C  | -1.22766700 | 1.18214200  | -0.87404400 |
| C  | -2.32295500 | 2.11351500  | -0.65413600 |
| C  | -2.39908700 | 2.85036000  | 0.53981200  |
| C  | -3.30648000 | 2.28435300  | -1.64279300 |
| C  | -3.45257900 | 3.74166800  | 0.73993400  |
| H  | -1.62979200 | 2.71994600  | 1.29394900  |
| C  | -4.35611800 | 3.17819600  | -1.43350300 |
| H  | -3.24385600 | 1.71319300  | -2.56419700 |
| C  | -4.43544400 | 3.90338700  | -0.24100500 |
| H  | -3.50441200 | 4.31351800  | 1.66201400  |

|   |             |             |             |
|---|-------------|-------------|-------------|
| H | -5.11216600 | 3.30891100  | -2.20213800 |
| H | -5.25550700 | 4.59669900  | -0.08007500 |
| N | -3.13134300 | -0.77962700 | 1.02165000  |
| H | -3.18725100 | -1.77749900 | 1.23046100  |
| C | -4.38966900 | -0.40524100 | 0.31338900  |
| C | -4.54792600 | -1.07749300 | -1.04147400 |
| H | -5.24689700 | -0.64734000 | 0.95856100  |
| H | -4.37504100 | 0.67892200  | 0.19011000  |
| H | -5.48344600 | -0.75036700 | -1.50665100 |
| H | -4.58322500 | -2.16834300 | -0.95540200 |
| H | -3.72317400 | -0.80723400 | -1.70953400 |
| C | -3.06884300 | -0.06339000 | 2.32903000  |
| C | -1.81532500 | -0.37553500 | 3.12819800  |
| H | -3.11132900 | 1.00392800  | 2.10166700  |
| H | -3.97004200 | -0.30587700 | 2.91142000  |
| H | -1.83234500 | 0.17482200  | 4.07337900  |
| H | -0.91643500 | -0.07025200 | 2.58702400  |
| H | -1.73628800 | -1.44153800 | 3.36701300  |
| C | 4.47232600  | -0.17662200 | 0.57821700  |
| C | 5.02806600  | 1.01495200  | 1.40002400  |
| C | 4.61684100  | -1.44505600 | 1.45757300  |
| C | 5.35836400  | -0.36327300 | -0.67896400 |
| H | 5.00105300  | 1.96213200  | 0.85116600  |
| H | 4.47489200  | 1.16099600  | 2.33321900  |
| H | 6.07717900  | 0.82187300  | 1.66156200  |
| H | 4.16441000  | -2.33837900 | 1.01421700  |
| H | 5.68274400  | -1.66290300 | 1.60826400  |
| H | 4.18215100  | -1.30887700 | 2.45146900  |
| H | 6.40312200  | -0.49427300 | -0.36637900 |
| H | 5.08597500  | -1.24404500 | -1.26609900 |
| H | 5.32810400  | 0.49223600  | -1.35722800 |
| C | 1.74594200  | 0.80203400  | 1.72911400  |
| C | 1.84091600  | 0.12126700  | 2.95981500  |
| C | 1.12294900  | 2.06553000  | 1.74550600  |
| C | 1.34544600  | 0.66965000  | 4.14407000  |
| H | 2.31416900  | -0.85288000 | 3.00876900  |
| C | 0.61832300  | 2.61788200  | 2.92576100  |
| H | 1.04536700  | 2.64279300  | 0.82959300  |
| C | 0.73116300  | 1.92315900  | 4.13117600  |
| H | 1.44387400  | 0.11912400  | 5.07566400  |
| H | 0.15796100  | 3.60261300  | 2.90518000  |
| H | 0.35346000  | 2.35790300  | 5.05244600  |
| N | -1.07708700 | -3.18184300 | 0.20360500  |
| H | -0.27189200 | -3.38183800 | -0.39290400 |

|   |             |             |             |
|---|-------------|-------------|-------------|
| C | -0.72709300 | -3.60850100 | 1.58133200  |
| C | 0.56459500  | -2.97385800 | 2.06832400  |
| H | -1.56340900 | -3.33186800 | 2.23344200  |
| H | -0.64871400 | -4.70567800 | 1.61936800  |
| H | 0.78098000  | -3.29576700 | 3.09216000  |
| H | 0.48889700  | -1.88620700 | 2.05720800  |
| H | 1.40987100  | -3.26015100 | 1.43290000  |
| C | -2.22216500 | -3.97910100 | -0.31011800 |
| H | -2.08673700 | -5.03369000 | -0.02704100 |
| H | -3.12675600 | -3.63719900 | 0.20715900  |
| C | -2.40283200 | -3.88434700 | -1.81951800 |
| H | -1.51528000 | -4.25264400 | -2.34425400 |
| H | -3.25633400 | -4.49741100 | -2.12641300 |
| H | -2.58533200 | -2.85710500 | -2.14072200 |

### INT28

|    |             |             |             |
|----|-------------|-------------|-------------|
| C  | -1.51700700 | 1.49467400  | -1.02313500 |
| C  | -1.50424700 | 2.85632400  | -1.31456000 |
| C  | -0.42384800 | 0.71184300  | -1.50450100 |
| C  | -0.46763700 | 3.46216200  | -2.05804000 |
| H  | -2.32292800 | 3.48708500  | -0.98667800 |
| C  | 0.60150000  | 1.30547900  | -2.28910400 |
| C  | 0.56558900  | 2.69331700  | -2.56263800 |
| H  | -0.51680200 | 4.52555000  | -2.27536500 |
| H  | 1.26987100  | 0.66536100  | -2.86139100 |
| H  | 1.32687900  | 3.13336400  | -3.20005300 |
| C  | -2.82160700 | -1.12330600 | -1.14308300 |
| C  | -1.53936000 | -1.59760600 | -1.52335300 |
| C  | -3.93156600 | -1.92656300 | -1.45159400 |
| C  | -1.40039500 | -2.83527900 | -2.16810300 |
| C  | -3.79081700 | -3.15528600 | -2.09926700 |
| C  | -2.52074600 | -3.61287100 | -2.45223200 |
| H  | -0.41263800 | -3.17961700 | -2.45704500 |
| H  | -4.67015900 | -3.75096500 | -2.32679200 |
| H  | -2.40234900 | -4.56684300 | -2.95806100 |
| H  | -4.92965600 | -1.59780600 | -1.18694000 |
| Pd | 1.84748400  | 0.56176600  | -0.37235900 |
| Si | -2.89261900 | 0.49326000  | -0.16194200 |
| C  | -0.34621200 | -0.75735100 | -1.25481600 |
| C  | 0.85237700  | -1.14845900 | -0.77428900 |
| C  | 1.25894500  | -2.49630100 | -0.37679700 |
| C  | 0.62376000  | -3.14125600 | 0.70176900  |
| C  | 2.26870200  | -3.17861900 | -1.07893100 |
| C  | 0.99417800  | -4.43460100 | 1.06631900  |

|   |             |             |             |
|---|-------------|-------------|-------------|
| H | -0.15831800 | -2.61658200 | 1.24212100  |
| C | 2.62995600  | -4.47659800 | -0.71665800 |
| H | 2.75588100  | -2.68641500 | -1.91682300 |
| C | 1.99740400  | -5.10544800 | 0.35982300  |
| H | 0.49541500  | -4.92347700 | 1.89853100  |
| H | 3.40241600  | -4.99815800 | -1.27462300 |
| H | 2.28082400  | -6.11490800 | 0.64279300  |
| N | 3.26928100  | -0.24365200 | 1.09318800  |
| H | 3.68112600  | 0.64214400  | 1.39221200  |
| C | 4.37678600  | -1.09248100 | 0.55798200  |
| C | 5.03551600  | -0.53297300 | -0.69303600 |
| H | 5.12137500  | -1.22816200 | 1.35499400  |
| H | 3.94386800  | -2.07113900 | 0.34491500  |
| H | 5.84138700  | -1.20313400 | -1.00945600 |
| H | 5.47469800  | 0.45536200  | -0.52374100 |
| H | 4.31362500  | -0.45754800 | -1.51324800 |
| C | 2.68532700  | -0.89147000 | 2.30894200  |
| C | 1.50998600  | -0.13519600 | 2.90316700  |
| H | 2.37004500  | -1.89228300 | 2.00975100  |
| H | 3.48796900  | -1.00718200 | 3.05090900  |
| H | 1.16074900  | -0.65112400 | 3.80170800  |
| H | 0.66759600  | -0.09137600 | 2.20631200  |
| H | 1.77837600  | 0.88633100  | 3.19235600  |
| C | -4.60131400 | 1.36765100  | -0.14742300 |
| C | -5.63345100 | 0.48057800  | 0.59098500  |
| C | -4.54555100 | 2.70562900  | 0.62728500  |
| C | -5.06705300 | 1.62747800  | -1.59591800 |
| H | -5.83162700 | -0.46623400 | 0.08195300  |
| H | -5.31171400 | 0.24968600  | 1.61300400  |
| H | -6.59184600 | 1.01313000  | 0.65794500  |
| H | -3.85859200 | 3.43624200  | 0.18887900  |
| H | -5.54173000 | 3.16849300  | 0.62437900  |
| H | -4.26076400 | 2.55800000  | 1.67433200  |
| H | -6.05633400 | 2.10502500  | -1.59598500 |
| H | -4.38049000 | 2.29350400  | -2.13270100 |
| H | -5.14710900 | 0.70005100  | -2.17397700 |
| C | -2.34860100 | 0.12020100  | 1.60954100  |
| C | -2.00114300 | 1.15256500  | 2.50133800  |
| C | -2.36064900 | -1.19656500 | 2.10613500  |
| C | -1.69047000 | 0.88609600  | 3.83624700  |
| H | -1.97818100 | 2.18275400  | 2.15480900  |
| C | -2.04515700 | -1.47063300 | 3.43969800  |
| H | -2.62924000 | -2.01676000 | 1.44470200  |
| C | -1.71464700 | -0.42842600 | 4.30902600  |

|   |             |             |             |
|---|-------------|-------------|-------------|
| H | -1.43469700 | 1.70191500  | 4.50732300  |
| H | -2.07011800 | -2.49488300 | 3.80254600  |
| H | -1.48193200 | -0.63821700 | 5.34952700  |
| N | 2.59748100  | 2.73773600  | 0.02616300  |
| H | 1.98433300  | 3.23143900  | -0.62569200 |
| C | 2.28062300  | 3.24495700  | 1.38557500  |
| C | 0.78318600  | 3.21340100  | 1.66199200  |
| H | 2.82295500  | 2.62607800  | 2.11056100  |
| H | 2.66465000  | 4.26956600  | 1.49870200  |
| H | 0.57828500  | 3.56964400  | 2.67645900  |
| H | 0.38077700  | 2.20241500  | 1.56890400  |
| H | 0.24219400  | 3.85789700  | 0.95996200  |
| C | 3.99749300  | 3.03726000  | -0.36547700 |
| H | 4.24672600  | 4.07372900  | -0.09384400 |
| H | 4.65565400  | 2.39345700  | 0.22960300  |
| C | 4.23841500  | 2.82518500  | -1.85582000 |
| H | 3.64402700  | 3.52760300  | -2.45107400 |
| H | 5.29213700  | 2.99822600  | -2.09514300 |
| H | 3.97885800  | 1.80821200  | -2.16357100 |

#### TS21

|    |             |             |             |
|----|-------------|-------------|-------------|
| C  | -1.98072000 | -0.04494300 | 1.70232100  |
| C  | -2.48901000 | -0.18611600 | 3.00366300  |
| C  | -0.67601300 | 0.47644300  | 1.57748500  |
| C  | -1.73520800 | 0.17133200  | 4.12393600  |
| H  | -3.48818500 | -0.58231100 | 3.15260200  |
| C  | 0.07035000  | 0.89604500  | 2.69029200  |
| C  | -0.45798300 | 0.71608300  | 3.96754100  |
| H  | -2.15223900 | 0.04082500  | 5.11869500  |
| H  | 1.04915400  | 1.34638300  | 2.55784200  |
| H  | 0.12378800  | 1.01020700  | 4.83677300  |
| C  | -2.85414700 | 1.45545000  | -0.64274100 |
| C  | -1.66143300 | 2.21848700  | -0.54960900 |
| C  | -3.96460000 | 2.07300900  | -1.24102500 |
| C  | -1.61553000 | 3.53971500  | -1.03139700 |
| C  | -3.92070900 | 3.38486000  | -1.71604500 |
| C  | -2.74027800 | 4.12153300  | -1.60685300 |
| H  | -0.68615800 | 4.09768700  | -0.96119300 |
| H  | -4.80341300 | 3.82744000  | -2.16921500 |
| H  | -2.69179100 | 5.14307900  | -1.97354800 |
| H  | -4.89349800 | 1.52293200  | -1.34139400 |
| Pd | 0.53153100  | -0.26407600 | 0.08487000  |
| O  | 1.80225500  | -2.44061500 | 0.90196400  |
| S  | 2.72908100  | -2.22015600 | -0.24071900 |

|    |             |             |             |
|----|-------------|-------------|-------------|
| O  | 2.16810500  | -1.15546600 | -1.16895900 |
| O  | 3.29363700  | -3.38824800 | -0.91341800 |
| C  | 4.16685400  | -1.31382300 | 0.52520600  |
| F  | 3.71210500  | -0.26684700 | 1.24186500  |
| F  | 4.98556900  | -0.84160000 | -0.42859700 |
| F  | 4.86061900  | -2.11698700 | 1.33457800  |
| Si | -2.90534000 | -0.30058900 | 0.07661500  |
| C  | -0.41371300 | 1.67638500  | -0.02089100 |
| C  | 0.86442600  | 1.74991500  | -0.21680600 |
| C  | 2.08360100  | 2.47790600  | -0.34828100 |
| C  | 2.13973500  | 3.80813700  | 0.13001100  |
| C  | 3.23064600  | 1.89902300  | -0.93199900 |
| C  | 3.31400800  | 4.54270000  | 0.00759100  |
| H  | 1.26192500  | 4.24004900  | 0.60190100  |
| C  | 4.40040700  | 2.64281100  | -1.03816900 |
| H  | 3.18659300  | 0.87440100  | -1.28132600 |
| C  | 4.44654300  | 3.96196100  | -0.57446300 |
| H  | 3.35201500  | 5.56427400  | 0.37517900  |
| H  | 5.28245200  | 2.18678900  | -1.47788400 |
| H  | 5.36525300  | 4.53568900  | -0.65953100 |
| C  | -1.85177400 | -1.44753500 | -0.98996000 |
| C  | -1.15412300 | -2.53118500 | -0.40975800 |
| C  | -1.74469100 | -1.26471000 | -2.38395600 |
| C  | -0.37433100 | -3.39074300 | -1.19214500 |
| H  | -1.21093500 | -2.70620200 | 0.66216100  |
| C  | -0.96567800 | -2.12009900 | -3.16144200 |
| H  | -2.25494600 | -0.42859000 | -2.85712600 |
| C  | -0.27429000 | -3.18022000 | -2.56557000 |
| H  | 0.18809200  | -4.18728800 | -0.71663900 |
| H  | -0.88045700 | -1.95078200 | -4.23163600 |
| H  | 0.35785400  | -3.82648300 | -3.16709500 |
| C  | -4.66048800 | -1.05104500 | 0.26322700  |
| C  | -4.52005600 | -2.41207000 | 0.98755300  |
| H  | -5.50596800 | -2.89074800 | 1.07112800  |
| H  | -3.86695000 | -3.09733200 | 0.43541800  |
| H  | -4.11707000 | -2.31405600 | 2.00095800  |
| C  | -5.25664400 | -1.33314300 | -1.13628800 |
| H  | -6.22619800 | -1.84019700 | -1.03063200 |
| H  | -5.43118500 | -0.42138700 | -1.71766100 |
| H  | -4.60445300 | -1.98405600 | -1.72926700 |
| C  | -5.62059700 | -0.14231200 | 1.05990700  |
| H  | -6.60270400 | -0.62737200 | 1.15381600  |
| H  | -5.25820400 | 0.05964600  | 2.07347800  |
| H  | -5.77763700 | 0.82607800  | 0.57377000  |



**INT29**

|    |             |             |             |
|----|-------------|-------------|-------------|
| C  | -1.65016000 | -1.57223800 | 1.16020300  |
| C  | -1.41904000 | -2.86200900 | 1.62065300  |
| C  | -0.89075300 | -0.51156100 | 1.74902700  |
| C  | -0.44207500 | -3.14309000 | 2.60139600  |
| H  | -1.98528300 | -3.69319800 | 1.21299900  |
| C  | 0.07387000  | -0.78385000 | 2.76231500  |
| C  | 0.29841800  | -2.12242500 | 3.16689800  |
| H  | -0.28063200 | -4.17047700 | 2.91463700  |
| H  | 0.48319800  | 0.03461800  | 3.34889600  |
| H  | 1.03556900  | -2.32992500 | 3.93647100  |
| C  | -3.41918600 | 0.66832000  | 0.48556500  |
| C  | -2.44625800 | 1.47264000  | 1.13759800  |
| C  | -4.71252400 | 1.19168200  | 0.34363600  |
| C  | -2.76770300 | 2.76159800  | 1.57952700  |
| C  | -5.03598600 | 2.47198500  | 0.80094600  |
| C  | -4.05825400 | 3.26174400  | 1.40689000  |
| H  | -2.00687600 | 3.36448600  | 2.06488500  |
| H  | -6.04635500 | 2.85249000  | 0.67713400  |
| H  | -4.30118100 | 4.26180300  | 1.75583200  |
| H  | -5.48705600 | 0.60144100  | -0.13528600 |
| Pd | 1.24293200  | -0.19602100 | 0.83501400  |
| O  | 2.57806000  | -1.99131200 | 0.06784600  |
| S  | 3.38531900  | -1.05244100 | -0.78322500 |
| O  | 2.74914200  | 0.32686200  | -0.69073400 |
| O  | 3.76221900  | -1.49610600 | -2.12105700 |
| C  | 4.96462700  | -0.83180900 | 0.17766300  |
| F  | 4.67276300  | -0.40711500 | 1.41647900  |
| F  | 5.74484900  | 0.07138400  | -0.41978900 |
| F  | 5.61617600  | -1.99480500 | 0.25899400  |
| Si | -2.78401400 | -0.96690100 | -0.22946100 |
| C  | -1.08759700 | 0.91335900  | 1.31535200  |
| C  | 0.09010100  | 1.41417700  | 0.90989900  |
| C  | 0.54188900  | 2.67104000  | 0.33919100  |
| C  | 0.69050300  | 3.81034400  | 1.15268900  |
| C  | 0.84495800  | 2.75642700  | -1.03383300 |
| C  | 1.10500500  | 5.01902100  | 0.59769500  |
| H  | 0.48178900  | 3.73494500  | 2.21621700  |
| C  | 1.25945600  | 3.96816800  | -1.57883900 |
| H  | 0.75354200  | 1.87271500  | -1.65431100 |
| C  | 1.38867700  | 5.10059200  | -0.76876500 |
| H  | 1.21101500  | 5.89578400  | 1.23067700  |
| H  | 1.48491200  | 4.02795000  | -2.63987100 |

|   |             |             |             |
|---|-------------|-------------|-------------|
| H | 1.71532300  | 6.04318700  | -1.19954600 |
| C | -1.64021800 | -0.54210600 | -1.67070500 |
| C | -0.45472200 | -1.26595300 | -1.90212000 |
| C | -1.93616400 | 0.53155000  | -2.52919800 |
| C | 0.41098700  | -0.92488100 | -2.94389200 |
| H | -0.18164100 | -2.09047000 | -1.24738000 |
| C | -1.08219100 | 0.86875500  | -3.58191900 |
| H | -2.83079000 | 1.12721300  | -2.36070500 |
| C | 0.09468200  | 0.14386500  | -3.78670900 |
| H | 1.33806500  | -1.47300100 | -3.08144300 |
| H | -1.32627800 | 1.70718100  | -4.22948600 |
| H | 0.77109300  | 0.41621300  | -4.59250000 |
| C | -4.12209100 | -2.21555000 | -0.78935200 |
| C | -3.43552300 | -3.48948100 | -1.33518700 |
| H | -4.19475500 | -4.18003100 | -1.72903900 |
| H | -2.74213900 | -3.25776200 | -2.15173600 |
| H | -2.87554000 | -4.03333100 | -0.56787900 |
| C | -4.94633300 | -1.61024100 | -1.94945800 |
| H | -5.66754700 | -2.35315300 | -2.31882500 |
| H | -5.51866100 | -0.72655100 | -1.65053900 |
| H | -4.30557700 | -1.32343000 | -2.79130700 |
| C | -5.05248200 | -2.58383800 | 0.38376800  |
| H | -5.81481200 | -3.30475800 | 0.05523900  |
| H | -4.50011200 | -3.04263500 | 1.21288800  |
| H | -5.57596700 | -1.70681900 | 0.78218400  |

## TS22

|   |             |             |             |
|---|-------------|-------------|-------------|
| C | -1.60948700 | -2.16300600 | -0.00031700 |
| C | -1.20602500 | -3.35805500 | -0.62046200 |
| C | -0.60938800 | -1.22932600 | 0.35007800  |
| C | 0.12634300  | -3.58489300 | -0.96839800 |
| H | -1.94349000 | -4.11604200 | -0.86661700 |
| C | 0.74807700  | -1.42397700 | -0.02695500 |
| C | 1.08249200  | -2.59362600 | -0.72909000 |
| H | 0.41228900  | -4.51497200 | -1.45356900 |
| H | 2.10518000  | -2.74609600 | -1.05924100 |
| C | -3.28416600 | -0.42650800 | 1.66000200  |
| C | -2.06708600 | 0.27699600  | 1.86162600  |
| C | -4.31174800 | -0.27758300 | 2.60326300  |
| C | -1.92727400 | 1.09523400  | 2.99586700  |
| C | -4.16663900 | 0.54957300  | 3.71785700  |
| C | -2.96868300 | 1.23963800  | 3.90915800  |
| H | -0.98768200 | 1.60826000  | 3.16964700  |
| H | -4.97831000 | 0.64747900  | 4.43408500  |

|    |             |             |             |
|----|-------------|-------------|-------------|
| H  | -2.83674800 | 1.87794400  | 4.77902300  |
| H  | -5.24443500 | -0.81810700 | 2.47691200  |
| Pd | 1.61158800  | 0.45264700  | -0.37824800 |
| O  | 3.00844900  | -1.55023000 | 1.46086000  |
| S  | 4.21903000  | -1.05750000 | 0.61942000  |
| O  | 5.14883300  | -0.23810300 | 1.38343000  |
| O  | 3.76010000  | -0.56951900 | -0.71173400 |
| C  | 5.09471900  | -2.66201700 | 0.24792100  |
| F  | 5.50752100  | -3.21861500 | 1.38407400  |
| F  | 6.14303400  | -2.40219800 | -0.53476400 |
| F  | 4.26884500  | -3.50137000 | -0.38372100 |
| Si | -3.34797300 | -1.44779100 | 0.08480700  |
| C  | -0.91653700 | 0.09333700  | 0.93355200  |
| C  | -0.03929100 | 1.07020600  | 0.58096400  |
| C  | -0.23084100 | 2.51264900  | 0.78610500  |
| C  | 0.69669300  | 3.28716400  | 1.50823900  |
| C  | -1.34067600 | 3.15811100  | 0.20720700  |
| C  | 0.51742300  | 4.66338700  | 1.65335200  |
| H  | 1.55276000  | 2.79304500  | 1.95814900  |
| C  | -1.51359500 | 4.53414700  | 0.34948700  |
| H  | -2.05674700 | 2.56737200  | -0.35577300 |
| C  | -0.58637000 | 5.29304900  | 1.07025200  |
| H  | 1.23769600  | 5.24349900  | 2.22461700  |
| H  | -2.37588300 | 5.01559600  | -0.10467200 |
| H  | -0.72313200 | 6.36553400  | 1.17850800  |
| C  | -3.42239900 | -0.19428500 | -1.33907300 |
| C  | -2.67637100 | -0.37643300 | -2.51716900 |
| C  | -4.18847800 | 0.98015100  | -1.22339000 |
| C  | -2.69586300 | 0.57367900  | -3.54100800 |
| H  | -2.05321000 | -1.26120100 | -2.62651800 |
| C  | -4.21132100 | 1.93538700  | -2.24268100 |
| H  | -4.75538300 | 1.16336800  | -0.31298100 |
| C  | -3.46183700 | 1.73394100  | -3.40460800 |
| H  | -2.10631800 | 0.41332800  | -4.44033700 |
| H  | -4.80702100 | 2.83788000  | -2.12793600 |
| H  | -3.47232700 | 2.47786900  | -4.19719000 |
| C  | -4.80532200 | -2.68334400 | -0.07204000 |
| C  | -4.72472000 | -3.41578200 | -1.43132300 |
| H  | -5.60485800 | -4.06278900 | -1.55790000 |
| H  | -4.70839200 | -2.71076000 | -2.27087900 |
| H  | -3.84117200 | -4.05555400 | -1.51547100 |
| C  | -6.14934600 | -1.91947100 | -0.04811300 |
| H  | -6.98062600 | -2.62497500 | -0.19137400 |
| H  | -6.32792500 | -1.39858000 | 0.89747700  |

|   |             |             |             |
|---|-------------|-------------|-------------|
| H | -6.20379900 | -1.17666700 | -0.85260000 |
| C | -4.76050600 | -3.71104800 | 1.07656600  |
| H | -5.59101600 | -4.42615400 | 0.98445900  |
| H | -3.82620100 | -4.28557200 | 1.06906200  |
| H | -4.84371900 | -3.23069600 | 2.05851800  |
| H | 2.00894400  | -1.34176500 | 0.91621600  |
| N | 2.26234700  | 2.40459100  | -1.21097900 |
| H | 1.74236600  | 3.11826500  | -0.69664000 |
| C | 3.71624400  | 2.66154800  | -1.02261000 |
| C | 4.08383100  | 2.87814800  | 0.44064500  |
| H | 4.00509100  | 3.54400100  | -1.61430900 |
| H | 4.25386500  | 1.79867900  | -1.42574700 |
| H | 5.16211700  | 3.04388300  | 0.52862300  |
| H | 3.56800400  | 3.75366100  | 0.85128600  |
| H | 3.83621900  | 2.00483500  | 1.04936600  |
| C | 1.87442600  | 2.49270900  | -2.64481800 |
| C | 0.36466800  | 2.43057800  | -2.85422600 |
| H | 2.37337600  | 1.66717100  | -3.16535000 |
| H | 2.27256700  | 3.42851100  | -3.06748100 |
| H | 0.13588700  | 2.52616300  | -3.92106400 |
| H | -0.05618900 | 1.48670100  | -2.49639900 |
| H | -0.14344400 | 3.24285500  | -2.32355700 |

### INT30

|    |             |             |             |
|----|-------------|-------------|-------------|
| C  | -1.65815100 | -2.17207200 | 0.12232300  |
| C  | -1.21622300 | -3.40691100 | -0.39062700 |
| C  | -0.69054200 | -1.18273200 | 0.39019300  |
| C  | 0.12246300  | -3.61590700 | -0.71226400 |
| H  | -1.92868800 | -4.20721800 | -0.56804000 |
| C  | 0.65875100  | -1.34515300 | -0.01907100 |
| C  | 1.04306500  | -2.56258500 | -0.58882700 |
| H  | 0.44609600  | -4.57688500 | -1.10563000 |
| H  | 2.05824500  | -2.70221100 | -0.94766400 |
| C  | -3.39235900 | -0.34054700 | 1.60529000  |
| C  | -2.18715300 | 0.38658600  | 1.80020300  |
| C  | -4.44974200 | -0.15072600 | 2.50706300  |
| C  | -2.09026600 | 1.26452800  | 2.89444000  |
| C  | -4.34690300 | 0.73843800  | 3.57759200  |
| C  | -3.16024400 | 1.44842900  | 3.76652300  |
| H  | -1.16138100 | 1.79499600  | 3.07161500  |
| H  | -5.18114100 | 0.86815400  | 4.26223000  |
| H  | -3.05933500 | 2.13417000  | 4.60394900  |
| H  | -5.37283800 | -0.70823900 | 2.38241300  |
| Pd | 1.57777000  | 0.45357800  | -0.32672700 |

|    |             |             |             |
|----|-------------|-------------|-------------|
| O  | 3.14809800  | -1.51577600 | 1.56651700  |
| S  | 4.31299500  | -1.07068500 | 0.58419400  |
| O  | 5.29857600  | -0.26286600 | 1.27924900  |
| O  | 3.74640600  | -0.61855700 | -0.70482800 |
| C  | 5.10207100  | -2.72806400 | 0.23595400  |
| F  | 5.57231100  | -3.23767700 | 1.36951100  |
| F  | 6.09882600  | -2.53485600 | -0.62654000 |
| F  | 4.20475100  | -3.55811700 | -0.29414300 |
| Si | -3.39702300 | -1.46003100 | 0.09796500  |
| C  | -1.00774700 | 0.16124300  | 0.91822400  |
| C  | -0.09265600 | 1.11037200  | 0.58228900  |
| C  | -0.26022500 | 2.56130500  | 0.74116600  |
| C  | 0.65403100  | 3.34150400  | 1.47408200  |
| C  | -1.33303700 | 3.21045600  | 0.09888200  |
| C  | 0.49973600  | 4.72532500  | 1.56673500  |
| H  | 1.48096800  | 2.84559400  | 1.97374900  |
| C  | -1.48206800 | 4.59360400  | 0.19024300  |
| H  | -2.03870000 | 2.61545300  | -0.47333300 |
| C  | -0.56681900 | 5.35783700  | 0.92078000  |
| H  | 1.21002000  | 5.30948400  | 2.14656600  |
| H  | -2.31580400 | 5.07717900  | -0.31250000 |
| H  | -0.68425200 | 6.43596600  | 0.98807900  |
| C  | -3.40006800 | -0.28569100 | -1.39618900 |
| C  | -2.57387000 | -0.51479400 | -2.51106200 |
| C  | -4.16876700 | 0.89252300  | -1.38214600 |
| C  | -2.51698500 | 0.39452900  | -3.56986600 |
| H  | -1.94483700 | -1.40153200 | -2.53971000 |
| C  | -4.11695900 | 1.80663400  | -2.43760200 |
| H  | -4.79613400 | 1.11381700  | -0.52115100 |
| C  | -3.28706400 | 1.55966700  | -3.53421200 |
| H  | -1.86490000 | 0.19884200  | -4.41766000 |
| H  | -4.71628900 | 2.71332000  | -2.40077100 |
| H  | -3.23773400 | 2.27253700  | -4.35352600 |
| C  | -4.84690000 | -2.70371100 | -0.04711900 |
| C  | -4.70214900 | -3.50700500 | -1.36026900 |
| H  | -5.56505000 | -4.17748800 | -1.48435400 |
| H  | -4.66630900 | -2.84709900 | -2.23516800 |
| H  | -3.80301600 | -4.13032500 | -1.37688800 |
| C  | -6.19281800 | -1.94738700 | -0.11987800 |
| H  | -7.01542800 | -2.66295700 | -0.26421100 |
| H  | -6.41326500 | -1.38144400 | 0.79057200  |
| H  | -6.21404600 | -1.24516800 | -0.96163100 |
| C  | -4.84613500 | -3.66830300 | 1.15575000  |
| H  | -5.67031200 | -4.39148800 | 1.06866100  |

|   |             |             |             |
|---|-------------|-------------|-------------|
| H | -3.91063700 | -4.23766200 | 1.21693400  |
| H | -4.97058800 | -3.13645200 | 2.10637100  |
| H | 2.23338700  | -1.33263900 | 1.13209000  |
| N | 2.35540200  | 2.41215800  | -1.13555300 |
| H | 1.82564900  | 3.13921800  | -0.65116500 |
| C | 3.79965500  | 2.63736200  | -0.87212800 |
| C | 4.09222100  | 2.82972500  | 0.61182400  |
| H | 4.14372700  | 3.51867100  | -1.43625100 |
| H | 4.34031700  | 1.76764900  | -1.25677200 |
| H | 5.16966000  | 2.94027600  | 0.76807300  |
| H | 3.59435700  | 3.72638800  | 0.99797300  |
| H | 3.75964800  | 1.96847900  | 1.19796800  |
| C | 2.04211700  | 2.50179100  | -2.58588700 |
| C | 0.54207800  | 2.47312100  | -2.86634700 |
| H | 2.54384900  | 1.66008900  | -3.07780000 |
| H | 2.48213200  | 3.42429700  | -2.99731900 |
| H | 0.36533400  | 2.56848900  | -3.94319700 |
| H | 0.08336400  | 1.54082500  | -2.52362700 |
| H | 0.02947100  | 3.29970500  | -2.36250900 |

### TS23

|    |             |             |             |
|----|-------------|-------------|-------------|
| C  | 1.91179400  | -1.48007900 | -1.49771900 |
| C  | 1.44930000  | -2.60026100 | -2.21270900 |
| C  | 1.09532500  | -0.33430600 | -1.50315300 |
| C  | 0.20135100  | -2.61321400 | -2.83867500 |
| H  | 2.06057100  | -3.49555800 | -2.26234600 |
| C  | -0.21501100 | -0.41478200 | -2.00882600 |
| C  | -0.68095600 | -1.53471900 | -2.67783600 |
| H  | -0.11861700 | -3.49089100 | -3.39334700 |
| H  | -0.40853100 | 1.20918500  | -2.04841800 |
| H  | -1.70853600 | -1.59388500 | -3.01816200 |
| C  | 3.81755400  | 0.38446200  | -0.34064400 |
| C  | 2.87769900  | 1.36446700  | -0.76145100 |
| C  | 5.15683100  | 0.77545200  | -0.19069400 |
| C  | 3.32010300  | 2.66354700  | -1.06847100 |
| C  | 5.57978800  | 2.07717700  | -0.46277900 |
| C  | 4.65681700  | 3.01985300  | -0.91686400 |
| H  | 2.61406400  | 3.39643500  | -1.44159100 |
| H  | 6.62540900  | 2.34671200  | -0.33973600 |
| H  | 4.97624700  | 4.02896200  | -1.16260000 |
| H  | 5.89666800  | 0.04987800  | 0.12931700  |
| Pd | -1.42487800 | 0.74528000  | -0.80848000 |
| O  | -3.04190500 | -0.72780400 | -0.88040800 |
| S  | -3.12311600 | -1.73593200 | 0.25749700  |

|    |             |             |             |
|----|-------------|-------------|-------------|
| O  | -3.22557200 | -1.07178000 | 1.57740900  |
| O  | -2.19616900 | -2.86635500 | 0.14523100  |
| C  | -4.82404800 | -2.41137200 | -0.07325300 |
| F  | -5.72686700 | -1.41895500 | -0.00691700 |
| F  | -5.13338600 | -3.33613500 | 0.84095700  |
| F  | -4.87825500 | -2.96349800 | -1.28995400 |
| Si | 3.18505500  | -1.38326700 | -0.11470200 |
| C  | 1.45158500  | 0.99905900  | -0.95430300 |
| C  | 0.37180100  | 1.83008800  | -0.82248100 |
| C  | 0.27697700  | 3.20589300  | -0.33756900 |
| C  | 0.96362700  | 3.60941000  | 0.82509600  |
| C  | -0.54971000 | 4.13890600  | -0.98886500 |
| C  | 0.83378900  | 4.90858200  | 1.30812300  |
| H  | 1.58800500  | 2.89029800  | 1.34444200  |
| C  | -0.67665300 | 5.43984300  | -0.50298400 |
| H  | -1.09821000 | 3.82893800  | -1.87446000 |
| C  | 0.01331000  | 5.82935800  | 0.64789900  |
| H  | 1.36584200  | 5.20124900  | 2.20916500  |
| H  | -1.31762100 | 6.14789600  | -1.02110200 |
| H  | -0.09130300 | 6.84044400  | 1.03116700  |
| N  | -2.65425600 | 1.71427500  | 0.78070100  |
| H  | -3.13682700 | 0.86375400  | 1.09175700  |
| C  | -3.66603200 | 2.66324100  | 0.25352300  |
| C  | -4.52575900 | 2.06205200  | -0.85545200 |
| H  | -4.30914800 | 2.99249500  | 1.08461500  |
| H  | -3.12606800 | 3.54614600  | -0.10543200 |
| H  | -5.30955200 | 2.77373200  | -1.13754600 |
| H  | -4.99849100 | 1.12905500  | -0.53461700 |
| H  | -3.92998400 | 1.83567300  | -1.74583800 |
| C  | -1.96555800 | 2.26536200  | 1.97514400  |
| C  | -0.97769200 | 1.27196000  | 2.57266200  |
| H  | -1.46757300 | 3.19093500  | 1.67873800  |
| H  | -2.72789400 | 2.53199200  | 2.72363900  |
| H  | -0.52352600 | 1.69062900  | 3.47705200  |
| H  | -0.17238000 | 1.03012900  | 1.87205300  |
| H  | -1.47518300 | 0.33540900  | 2.83445900  |
| C  | 4.53137500  | -2.74641800 | -0.09948600 |
| C  | 5.45158900  | -2.59057600 | 1.13276300  |
| C  | 3.83869000  | -4.12445600 | 0.02419200  |
| C  | 5.36498300  | -2.70149600 | -1.39580100 |
| H  | 6.02667100  | -1.65903700 | 1.12552300  |
| H  | 4.87993400  | -2.62300600 | 2.06719200  |
| H  | 6.17721300  | -3.41618700 | 1.15952500  |
| H  | 3.22361200  | -4.36745100 | -0.84727000 |

|   |             |             |             |
|---|-------------|-------------|-------------|
| H | 4.59856500  | -4.91399000 | 0.11378700  |
| H | 3.19638800  | -4.17825900 | 0.91065700  |
| H | 6.11504400  | -3.50556900 | -1.39555000 |
| H | 4.73674400  | -2.83597200 | -2.28488200 |
| H | 5.89815100  | -1.75074900 | -1.50997700 |
| C | 2.14483700  | -1.46194300 | 1.46164400  |
| C | 0.86339200  | -2.04769600 | 1.45855100  |
| C | 2.61878100  | -0.92047100 | 2.67147700  |
| C | 0.09081500  | -2.10430500 | 2.61996600  |
| H | 0.43806600  | -2.44818000 | 0.54269900  |
| C | 1.85217200  | -0.97892400 | 3.83743400  |
| H | 3.59299500  | -0.43553900 | 2.70296300  |
| C | 0.58853200  | -1.57544900 | 3.81296300  |
| H | -0.90410400 | -2.53587300 | 2.57282400  |
| H | 2.23693000  | -0.55377200 | 4.76142500  |
| H | -0.01298000 | -1.61285900 | 4.71775400  |

### INT31

|    |             |             |             |
|----|-------------|-------------|-------------|
| C  | 1.88104900  | -1.70273500 | -1.36972100 |
| C  | 1.38362600  | -2.91647200 | -1.82099600 |
| C  | 0.99754700  | -0.57138700 | -1.41975700 |
| C  | 0.03861600  | -3.05012500 | -2.22988900 |
| H  | 2.00861400  | -3.80358600 | -1.81106400 |
| C  | -0.40744900 | -0.76011300 | -1.62271700 |
| C  | -0.87203200 | -2.01487600 | -2.03587100 |
| H  | -0.30829200 | -4.00752300 | -2.61215200 |
| H  | -0.07093600 | 1.91223400  | -2.23185200 |
| H  | -1.93450000 | -2.18412200 | -2.16595600 |
| C  | 3.81081700  | 0.31274800  | -0.61249600 |
| C  | 2.78264000  | 1.20750100  | -1.03119700 |
| C  | 5.13059600  | 0.77406400  | -0.59692300 |
| C  | 3.13516800  | 2.51009000  | -1.44595900 |
| C  | 5.46132600  | 2.07080800  | -1.00103000 |
| C  | 4.45834300  | 2.93676800  | -1.43616900 |
| H  | 2.36775900  | 3.19123600  | -1.79133600 |
| H  | 6.49829300  | 2.39594100  | -0.98690600 |
| H  | 4.70308300  | 3.94159200  | -1.76788300 |
| H  | 5.92975900  | 0.11180300  | -0.28227200 |
| Pd | -1.52603100 | 0.65618700  | -0.84629000 |
| O  | -3.27902900 | -0.68342300 | -0.74956600 |
| S  | -3.44541800 | -1.43953700 | 0.56068500  |
| O  | -4.24453200 | -0.68424300 | 1.54416100  |
| O  | -2.20978800 | -2.08199900 | 1.03745200  |
| C  | -4.52648500 | -2.83582400 | -0.02292200 |



|    |             |             |             |
|----|-------------|-------------|-------------|
| F  | -5.67665500 | -2.36540100 | -0.51835000 |
| F  | -4.79584700 | -3.66287300 | 0.99311700  |
| F  | -3.89442400 | -3.52830400 | -0.98572600 |
| Si | 3.25623000  | -1.41994100 | -0.11775500 |
| C  | 1.37610900  | 0.77986300  | -1.16873200 |
| C  | 0.26795900  | 1.74934000  | -1.19753400 |
| C  | 0.34931300  | 2.99026500  | -0.39399200 |
| C  | 0.89722100  | 2.97503100  | 0.90364100  |
| C  | -0.16015200 | 4.20354200  | -0.88814400 |
| C  | 0.94582900  | 4.13696200  | 1.66853000  |
| H  | 1.27437400  | 2.04226700  | 1.31409100  |
| C  | -0.11947400 | 5.36575700  | -0.11732200 |
| H  | -0.59139100 | 4.22979600  | -1.88671200 |
| C  | 0.43670800  | 5.33873600  | 1.16424100  |
| H  | 1.36989900  | 4.10163100  | 2.66842500  |
| H  | -0.52049200 | 6.29278900  | -0.51856200 |
| H  | 0.46721900  | 6.24227700  | 1.76659700  |
| N  | -2.93455400 | 2.05262200  | 0.29027900  |
| H  | -3.62784800 | 1.33725300  | 0.52509100  |
| C  | -3.60983900 | 3.07101000  | -0.54534000 |
| C  | -4.22643700 | 2.46419800  | -1.80308900 |
| H  | -4.38835000 | 3.57693600  | 0.04822300  |
| H  | -2.86132100 | 3.82692300  | -0.80478900 |
| H  | -4.78878900 | 3.22724000  | -2.35265100 |
| H  | -4.90707700 | 1.64376600  | -1.55184800 |
| H  | -3.45376700 | 2.05818800  | -2.46529200 |
| C  | -2.45316700 | 2.62216600  | 1.57300400  |
| C  | -1.83000000 | 1.55553900  | 2.46665500  |
| H  | -1.72810300 | 3.40332800  | 1.33701200  |
| H  | -3.29644200 | 3.10436200  | 2.09283500  |
| H  | -1.47345800 | 2.00944800  | 3.39798200  |
| H  | -0.97459200 | 1.07916100  | 1.97804900  |
| H  | -2.55501400 | 0.77315200  | 2.70957000  |
| C  | 4.62711600  | -2.74868200 | -0.01008200 |
| C  | 5.63520700  | -2.39518000 | 1.10761400  |
| C  | 3.97963600  | -4.10085800 | 0.37243700  |
| C  | 5.35785500  | -2.88499400 | -1.36098200 |
| H  | 6.18450900  | -1.46805400 | 0.91397600  |
| H  | 5.13928000  | -2.29357800 | 2.07945200  |
| H  | 6.38127300  | -3.19737000 | 1.19870600  |
| H  | 3.31153400  | -4.48359100 | -0.40461300 |
| H  | 4.76360100  | -4.85604600 | 0.52568700  |
| H  | 3.40347800  | -4.02633800 | 1.30205600  |
| H  | 6.12653600  | -3.66874000 | -1.30156400 |

|   |             |             |             |
|---|-------------|-------------|-------------|
| H | 4.66801100  | -3.15878500 | -2.16854200 |
| H | 5.85692600  | -1.95387800 | -1.65434700 |
| C | 2.34913600  | -1.18695000 | 1.52621400  |
| C | 1.02769700  | -1.63374900 | 1.71732600  |
| C | 2.94619100  | -0.43446200 | 2.55721000  |
| C | 0.32861000  | -1.34367000 | 2.89125000  |
| H | 0.50775300  | -2.18330200 | 0.93830600  |
| C | 2.25463800  | -0.14857800 | 3.73595400  |
| H | 3.95453900  | -0.04451700 | 2.43093000  |
| C | 0.94296100  | -0.60249900 | 3.90264900  |
| H | -0.70018200 | -1.67582900 | 2.98384600  |
| H | 2.73391300  | 0.43668000  | 4.51708900  |
| H | 0.39680200  | -0.36682900 | 4.81249000  |

#### TS24

|    |             |             |             |
|----|-------------|-------------|-------------|
| C  | -2.27282500 | 0.48789600  | -0.99236700 |
| C  | -2.27286300 | 1.38834000  | -2.06715100 |
| C  | -1.03616800 | 0.02629400  | -0.46921200 |
| C  | -1.08024700 | 1.85085900  | -2.62194800 |
| H  | -3.22003100 | 1.74825000  | -2.46190400 |
| C  | 0.15347900  | 0.54221300  | -1.00620400 |
| C  | 0.13800800  | 1.43180200  | -2.08358600 |
| H  | -1.09357300 | 2.54647600  | -3.45743000 |
| H  | 1.06959400  | 1.81965900  | -2.48638300 |
| C  | -3.33316600 | -0.50426100 | 1.53950500  |
| C  | -1.98840300 | -0.88776600 | 1.75474100  |
| C  | -4.20484100 | -0.44286300 | 2.63716900  |
| C  | -1.55860000 | -1.18828700 | 3.05794300  |
| C  | -3.77252800 | -0.75335600 | 3.92697200  |
| C  | -2.44244400 | -1.12413100 | 4.13426000  |
| H  | -0.51986300 | -1.45056500 | 3.23084300  |
| H  | -4.46228600 | -0.69455200 | 4.76474500  |
| H  | -2.08716400 | -1.34930600 | 5.13652400  |
| H  | -5.23638100 | -0.13479000 | 2.48003800  |
| Si | -3.87905300 | -0.08797600 | -0.20722100 |
| C  | -1.02947000 | -1.00926400 | 0.61605800  |
| C  | -0.27410700 | -2.13091700 | 0.52497000  |
| C  | 0.62254900  | -2.44923700 | -0.60340400 |
| C  | 0.25970700  | -3.49617300 | -1.46386000 |
| C  | 0.98088800  | -3.74219200 | -2.63127100 |
| H  | -0.62709700 | -4.08354700 | -1.24085800 |
| C  | 2.49607600  | -1.95377500 | -2.07732300 |
| C  | 2.09320500  | -2.95521800 | -2.95293100 |
| H  | 0.66727300  | -4.53980500 | -3.29979000 |

|    |             |             |             |
|----|-------------|-------------|-------------|
| H  | 3.38566200  | -1.37471800 | -2.30609300 |
| H  | 2.64405000  | -3.13593100 | -3.87189800 |
| Pd | 1.89893800  | 0.31374900  | -0.13440900 |
| H  | -0.44522200 | -2.92189300 | 1.25354900  |
| C  | -5.08614900 | 1.36297500  | -0.16007200 |
| C  | -4.56975200 | 2.62517600  | 0.19825900  |
| C  | -6.46669100 | 1.27588000  | -0.41257800 |
| C  | -5.39312000 | 3.74642100  | 0.29993400  |
| H  | -3.50540800 | 2.73440600  | 0.39310100  |
| C  | -7.29707700 | 2.39531300  | -0.31354100 |
| H  | -6.91187800 | 0.32715500  | -0.69428500 |
| C  | -6.76187300 | 3.63356800  | 0.04327700  |
| H  | -4.96708200 | 4.70734400  | 0.57671700  |
| H  | -8.36071100 | 2.29872900  | -0.51662100 |
| H  | -7.40608900 | 4.50573500  | 0.11999200  |
| C  | -4.55031100 | -1.64916300 | -1.10786700 |
| C  | -5.01370900 | -1.27519500 | -2.53123700 |
| C  | -3.40385100 | -2.67920400 | -1.21812400 |
| C  | -5.70468400 | -2.29891900 | -0.31635300 |
| H  | -5.84050600 | -0.55668300 | -2.52722700 |
| H  | -4.19449700 | -0.83615900 | -3.11410900 |
| H  | -5.35672900 | -2.17224600 | -3.06733000 |
| H  | -3.04672500 | -2.99454300 | -0.23130800 |
| H  | -3.75847100 | -3.57604800 | -1.74748800 |
| H  | -2.54585600 | -2.28158400 | -1.77139500 |
| H  | -6.03593200 | -3.21953900 | -0.81885900 |
| H  | -5.39044900 | -2.56957500 | 0.69876300  |
| H  | -6.57998900 | -1.64665800 | -0.22806500 |
| S  | 3.70337900  | 2.22364200  | 0.97477500  |
| C  | 4.79337500  | 2.55604900  | -0.49979000 |
| F  | 4.39884000  | 1.79255000  | -1.53980200 |
| F  | 6.06123200  | 2.24298800  | -0.20773400 |
| F  | 4.72543400  | 3.83782900  | -0.85971300 |
| O  | 2.31213400  | 2.47324800  | 0.45005300  |
| O  | 3.88499300  | 0.73705600  | 1.15367300  |
| O  | 4.18083700  | 3.08654100  | 2.04622400  |
| C  | 1.79830900  | -1.68773900 | -0.86827400 |
| H  | 2.65576900  | -1.68515400 | 0.11380600  |
| N  | 3.75638500  | -2.09123200 | 1.02798100  |
| H  | 4.01758800  | -1.23365000 | 1.51717300  |
| C  | 3.15678000  | -3.07277800 | 1.94357800  |
| C  | 2.27743700  | -2.36066400 | 2.96800600  |
| H  | 3.94068900  | -3.66093300 | 2.44344700  |
| H  | 2.56322300  | -3.76910400 | 1.33605200  |

|   |            |             |             |
|---|------------|-------------|-------------|
| H | 1.74069300 | -3.08644700 | 3.58737100  |
| H | 2.87932400 | -1.72519500 | 3.62760300  |
| H | 1.54425400 | -1.72507100 | 2.46318400  |
| C | 4.87081900 | -2.57178800 | 0.19463300  |
| C | 5.64911400 | -1.40691300 | -0.41588300 |
| H | 4.44221500 | -3.20893200 | -0.59009900 |
| H | 5.54269900 | -3.20301500 | 0.79524600  |
| H | 6.42755300 | -1.78863200 | -1.08440200 |
| H | 4.99841800 | -0.73707600 | -0.98360000 |
| H | 6.12525900 | -0.79979100 | 0.36028700  |

**INT32**

|    |             |             |             |
|----|-------------|-------------|-------------|
| C  | -2.25584300 | 0.36081100  | -1.21569300 |
| C  | -2.32681500 | 1.11155200  | -2.39730100 |
| C  | -0.99728500 | -0.11559100 | -0.75000600 |
| C  | -1.17971300 | 1.41046400  | -3.12857100 |
| H  | -3.29176900 | 1.47711200  | -2.74085300 |
| C  | 0.16669000  | 0.22919600  | -1.47539000 |
| C  | 0.05756400  | 0.96770200  | -2.66389500 |
| H  | -1.24407800 | 1.98936400  | -4.04680900 |
| H  | 0.95412200  | 1.21657200  | -3.22535300 |
| C  | -3.18725200 | -0.26083500 | 1.46867000  |
| C  | -1.85968100 | -0.72201000 | 1.63295200  |
| C  | -3.98367200 | -0.03206700 | 2.60104900  |
| C  | -1.39450400 | -0.95256900 | 2.94308400  |
| C  | -3.50513600 | -0.25988600 | 3.89088100  |
| C  | -2.20146900 | -0.73034300 | 4.05687600  |
| H  | -0.38165500 | -1.31207400 | 3.09854500  |
| H  | -4.13681800 | -0.07142900 | 4.75466200  |
| H  | -1.80705400 | -0.91392500 | 5.05329400  |
| H  | -4.99829200 | 0.33672600  | 2.46639400  |
| Si | -3.82719700 | -0.02426200 | -0.27601000 |
| C  | -0.95839400 | -0.99677400 | 0.46488900  |
| C  | -0.21703100 | -2.13900000 | 0.53220500  |
| C  | 0.72548700  | -2.71093100 | -0.43598200 |
| C  | 0.73084700  | -4.11625300 | -0.57402000 |
| C  | 1.59350700  | -4.75256000 | -1.45993000 |
| H  | 0.02967100  | -4.70496600 | 0.01506600  |
| C  | 2.51173100  | -2.59793600 | -2.07104900 |
| C  | 2.48492100  | -3.98721300 | -2.21728500 |
| H  | 1.57089700  | -5.83420500 | -1.56210800 |
| H  | 3.22364100  | -2.02119600 | -2.65601500 |
| H  | 3.16508600  | -4.47021600 | -2.91474300 |
| Pd | 2.02861300  | -0.02132400 | -0.85124000 |

|   |             |             |             |
|---|-------------|-------------|-------------|
| H | -0.42728400 | -2.79292100 | 1.37899000  |
| C | -4.96903800 | 1.47983900  | -0.32515800 |
| C | -4.37955500 | 2.75351500  | -0.19053000 |
| C | -6.36956500 | 1.42399500  | -0.43840300 |
| C | -5.15150800 | 3.91507300  | -0.16820900 |
| H | -3.29806300 | 2.83792700  | -0.11411600 |
| C | -7.14913200 | 2.58352400  | -0.41771500 |
| H | -6.87030200 | 0.46773400  | -0.54923500 |
| C | -6.54159300 | 3.83230600  | -0.28188800 |
| H | -4.66931100 | 4.88401000  | -0.06635900 |
| H | -8.22982700 | 2.50979900  | -0.51014500 |
| H | -7.14610200 | 4.73560700  | -0.26722500 |
| C | -4.62478500 | -1.65224800 | -0.91756500 |
| C | -5.17973600 | -1.43408600 | -2.34064100 |
| C | -3.52748400 | -2.73949300 | -0.97492900 |
| C | -5.74098400 | -2.14722300 | 0.02615600  |
| H | -5.97781300 | -0.68381600 | -2.36780900 |
| H | -4.39133800 | -1.10729300 | -3.02974600 |
| H | -5.59392400 | -2.37358000 | -2.73471800 |
| H | -3.11186800 | -2.95006900 | 0.01687400  |
| H | -3.95285300 | -3.67662000 | -1.36252500 |
| H | -2.69650100 | -2.45390100 | -1.62888300 |
| H | -6.13772200 | -3.10843800 | -0.33195200 |
| H | -5.36496000 | -2.30328500 | 1.04441900  |
| H | -6.58613400 | -1.45328500 | 0.08858900  |
| S | 4.17443000  | 1.63580200  | 0.39024900  |
| C | 5.65934100  | 1.96180500  | -0.68210400 |
| F | 5.48235900  | 1.38227900  | -1.87383300 |
| F | 6.75297600  | 1.45759500  | -0.10484100 |
| F | 5.81201000  | 3.27688700  | -0.84829700 |
| O | 3.01120000  | 2.15818200  | -0.38886900 |
| O | 4.10730500  | 0.11637400  | 0.42859500  |
| O | 4.43416800  | 2.25052300  | 1.69603000  |
| C | 1.65736100  | -1.94424000 | -1.16839100 |
| H | 1.34727900  | -0.79596500 | 1.75951800  |
| N | 2.14141600  | -0.48901300 | 2.34837000  |
| H | 2.87565500  | -0.21134000 | 1.66000000  |
| C | 1.74924600  | 0.71045100  | 3.17266800  |
| C | 0.95225000  | 1.72450800  | 2.36204500  |
| H | 2.68483600  | 1.14088400  | 3.53870900  |
| H | 1.16737900  | 0.33321300  | 4.01831900  |
| H | 0.68916800  | 2.55984700  | 3.01883700  |
| H | 1.52991400  | 2.11965400  | 1.52460700  |
| H | 0.02555100  | 1.28859300  | 1.97984100  |

|   |            |             |            |
|---|------------|-------------|------------|
| C | 2.68130600 | -1.64930000 | 3.13093000 |
| C | 3.25644500 | -2.71154900 | 2.20045800 |
| H | 1.86231300 | -2.03461100 | 3.74643000 |
| H | 3.44739500 | -1.24014900 | 3.79600800 |
| H | 3.66271100 | -3.53293600 | 2.79878400 |
| H | 2.49403900 | -3.11439400 | 1.52810000 |
| H | 4.06116600 | -2.29288000 | 1.58865000 |

**TS25**

|    |             |             |             |
|----|-------------|-------------|-------------|
| C  | 2.29415000  | 0.00982700  | -1.10390100 |
| C  | 2.27493700  | -0.48373500 | -2.41327800 |
| C  | 1.06729300  | 0.31554100  | -0.45015900 |
| C  | 1.07032300  | -0.66126700 | -3.10370200 |
| H  | 3.21328700  | -0.72371700 | -2.90815000 |
| C  | -0.15524200 | 0.05929300  | -1.12735500 |
| C  | -0.13191600 | -0.37987200 | -2.46673900 |
| H  | 1.07405000  | -1.02234700 | -4.12963400 |
| H  | -1.07042300 | -0.51504200 | -2.99764000 |
| C  | 3.43417900  | 0.36730700  | 1.56335800  |
| C  | 2.09253000  | 0.66406300  | 1.90482200  |
| C  | 4.35468900  | 0.07953700  | 2.58286400  |
| C  | 1.72403100  | 0.65178600  | 3.26454300  |
| C  | 3.98015100  | 0.08623000  | 3.92611100  |
| C  | 2.65543900  | 0.37373500  | 4.26253200  |
| H  | 0.68908300  | 0.83453000  | 3.53811600  |
| H  | 4.70750300  | -0.14193700 | 4.70079100  |
| H  | 2.34082300  | 0.36532200  | 5.30309300  |
| H  | 5.38188200  | -0.16216700 | 2.31692500  |
| Si | 3.91520300  | 0.38911600  | -0.24470700 |
| C  | 1.05593500  | 0.97505900  | 0.87810100  |
| C  | 0.14123900  | 1.95228100  | 1.16130600  |
| C  | -0.92149800 | 2.40109400  | 0.27934300  |
| C  | -1.29948200 | 3.75929400  | 0.27936800  |
| C  | -1.54889900 | 1.50141700  | -0.62931200 |
| C  | -2.20383500 | 4.25773100  | -0.65233500 |
| H  | -0.84697100 | 4.43019300  | 1.00676400  |
| C  | -2.42277700 | 2.04005500  | -1.60598100 |
| C  | -2.74732400 | 3.40000700  | -1.61834600 |
| H  | -2.47128200 | 5.31044200  | -0.64388400 |
| H  | -2.85224800 | 1.38136100  | -2.35627200 |
| H  | -3.43840500 | 3.78481200  | -2.36417400 |
| Pd | -1.79152300 | -0.42903400 | -0.04441800 |
| H  | 0.28759900  | 2.53516600  | 2.06817000  |
| C  | 5.15491500  | -0.99121600 | -0.60713700 |

|   |             |             |             |
|---|-------------|-------------|-------------|
| C | 4.66959400  | -2.30584800 | -0.75649900 |
| C | 6.54701600  | -0.80437000 | -0.68530300 |
| C | 5.53139400  | -3.38160800 | -0.97325300 |
| H | 3.59859600  | -2.48809000 | -0.71202500 |
| C | 7.41615500  | -1.87645800 | -0.90212800 |
| H | 6.96978800  | 0.18962800  | -0.57974800 |
| C | 6.90995100  | -3.16895800 | -1.04684100 |
| H | 5.12805400  | -4.38483100 | -1.08724600 |
| H | 8.48749500  | -1.70076800 | -0.95977900 |
| H | 7.58421200  | -4.00443500 | -1.21717300 |
| C | 4.52611500  | 2.14218600  | -0.75457300 |
| C | 5.02382800  | 2.12318000  | -2.21408300 |
| C | 3.33015500  | 3.11582500  | -0.64646400 |
| C | 5.64139600  | 2.64892100  | 0.18405900  |
| H | 5.88714600  | 1.46183900  | -2.34969200 |
| H | 4.23566200  | 1.78873600  | -2.90009200 |
| H | 5.32572800  | 3.13352400  | -2.52687000 |
| H | 2.93534500  | 3.16500900  | 0.37459600  |
| H | 3.64847900  | 4.12977400  | -0.92964100 |
| H | 2.50494500  | 2.82773800  | -1.30669600 |
| H | 5.92076300  | 3.67807400  | -0.08529000 |
| H | 5.31353900  | 2.65667800  | 1.23011900  |
| H | 6.55336500  | 2.04441300  | 0.12691400  |
| N | -1.72326400 | -2.65586700 | 0.50046700  |
| H | -0.87102800 | -2.96087000 | 0.02718900  |
| C | -1.53873900 | -2.87037400 | 1.95528700  |
| C | -0.29937300 | -2.15169500 | 2.47721400  |
| H | -1.47670600 | -3.94969100 | 2.17336200  |
| H | -2.43757100 | -2.48698000 | 2.44948000  |
| H | -0.16314500 | -2.35021500 | 3.54552900  |
| H | 0.60780000  | -2.48080800 | 1.95574200  |
| H | -0.38696100 | -1.07181100 | 2.33155800  |
| C | -2.85425200 | -3.44439000 | -0.03612600 |
| C | -2.95790800 | -3.33204900 | -1.55411300 |
| H | -3.76430400 | -3.05901400 | 0.43255300  |
| H | -2.75503000 | -4.50244900 | 0.25837800  |
| H | -3.78956900 | -3.94292300 | -1.92178700 |
| H | -3.12647300 | -2.29417800 | -1.85547800 |
| H | -2.03940000 | -3.68075600 | -2.04184700 |
| S | -5.05719000 | 0.22833800  | 0.89031800  |
| C | -5.63603700 | -0.53485700 | -0.71724800 |
| F | -4.71808800 | -0.32576600 | -1.66929100 |
| F | -6.78997900 | 0.00764000  | -1.08670500 |
| F | -5.78953400 | -1.84785200 | -0.53370700 |

|   |             |             |             |
|---|-------------|-------------|-------------|
| O | -3.86547600 | -0.53350100 | 1.28344400  |
| O | -4.67168800 | 1.69329700  | 0.39117400  |
| O | -6.20325000 | 0.33788300  | 1.76712700  |
| H | -3.79760200 | 1.71772100  | -0.09625100 |

**INT33**

|    |             |             |             |
|----|-------------|-------------|-------------|
| C  | -2.00773200 | 1.18504400  | -0.80547500 |
| C  | -2.29747100 | 2.29452700  | -1.62804200 |
| C  | -0.69312600 | 1.01643100  | -0.33416300 |
| C  | -1.31546800 | 3.20927500  | -1.98375400 |
| H  | -3.31529500 | 2.45001800  | -1.97674500 |
| C  | 0.30518300  | 1.96721900  | -0.68617000 |
| C  | -0.00535900 | 3.04524400  | -1.50136000 |
| H  | -1.55548800 | 4.05336800  | -2.62622000 |
| H  | 0.75241100  | 3.77509200  | -1.77229700 |
| C  | -2.45337000 | -1.20324000 | 0.87306500  |
| C  | -1.05360000 | -1.15142700 | 1.10690800  |
| C  | -3.20829100 | -2.21607200 | 1.49273100  |
| C  | -0.46580600 | -2.20142900 | 1.84456600  |
| C  | -2.61889100 | -3.20605100 | 2.27252800  |
| C  | -1.22956000 | -3.20917800 | 2.41852200  |
| H  | 0.60759200  | -2.24175800 | 1.95936500  |
| H  | -3.22730100 | -3.97689700 | 2.73812600  |
| H  | -0.73724700 | -3.99886900 | 2.98022600  |
| H  | -4.28678400 | -2.23182000 | 1.35332100  |
| Si | -3.31749800 | -0.06470700 | -0.34183400 |
| C  | -0.21040100 | -0.03683400 | 0.59924600  |
| C  | 1.09439000  | 0.19601800  | 0.95338800  |
| C  | 1.95760100  | -0.28348800 | 2.03452400  |
| C  | 3.26130100  | -0.75419900 | 1.75727800  |
| C  | 4.14144100  | -1.07247100 | 2.79398900  |
| H  | 3.56534900  | -0.90754500 | 0.72572800  |
| C  | 2.45978300  | -0.44638800 | 4.41345000  |
| C  | 3.74693700  | -0.91861600 | 4.12302300  |
| H  | 5.13319800  | -1.44962700 | 2.55833500  |
| H  | 2.14685400  | -0.32601900 | 5.44737000  |
| H  | 4.43185100  | -1.16593300 | 4.92936100  |
| Pd | 2.11074600  | 1.70767700  | 0.14479900  |
| H  | 1.58976600  | -0.62789400 | -0.80219000 |
| C  | -4.77448500 | 0.81420000  | 0.48607000  |
| C  | -4.61293000 | 2.11610300  | 0.99670700  |
| C  | -6.03023400 | 0.20162200  | 0.66024600  |
| C  | -5.65559000 | 2.77638100  | 1.65028500  |
| H  | -3.65940700 | 2.62409700  | 0.87742300  |



|   |             |             |             |
|---|-------------|-------------|-------------|
| C | -7.07662300 | 0.85530300  | 1.31343400  |
| H | -6.20369600 | -0.80111700 | 0.27993700  |
| C | -6.89147700 | 2.14719400  | 1.81039100  |
| H | -5.50290700 | 3.78258400  | 2.03308300  |
| H | -8.03602200 | 0.35766300  | 1.43199500  |
| H | -7.70519000 | 2.65951900  | 2.31752400  |
| C | -3.86182400 | -1.03852600 | -1.92215200 |
| C | -4.82571500 | -0.17517500 | -2.76370600 |
| C | -2.59786400 | -1.34592300 | -2.75605800 |
| C | -4.54897600 | -2.37950600 | -1.58827900 |
| H | -5.74270900 | 0.07421200  | -2.21774100 |
| H | -4.35815800 | 0.76381100  | -3.08262600 |
| H | -5.11505300 | -0.71715900 | -3.67601000 |
| H | -1.87302500 | -1.94777100 | -2.19890000 |
| H | -2.87506600 | -1.91145100 | -3.65788800 |
| H | -2.09162000 | -0.43030200 | -3.08135500 |
| H | -4.81681100 | -2.89839800 | -2.52026400 |
| H | -3.89037400 | -3.04339000 | -1.01917400 |
| H | -5.47659400 | -2.25184200 | -1.01755800 |
| S | 1.62726600  | -2.54239200 | -1.87340400 |
| C | 2.71815100  | -3.52711000 | -0.71935300 |
| F | 2.65021900  | -4.81347500 | -1.05718900 |
| F | 2.30150100  | -3.37642400 | 0.54115800  |
| F | 3.98308400  | -3.10562600 | -0.81454200 |
| O | 2.06899900  | -2.85298100 | -3.22015300 |
| O | 0.25966800  | -2.73951200 | -1.41673400 |
| O | 2.13657400  | -1.05861200 | -1.52879000 |
| C | 1.57771200  | -0.12889600 | 3.38727000  |
| H | 0.57865200  | 0.23472800  | 3.60778400  |
| N | 3.54496600  | 3.28001200  | -0.66384800 |
| H | 4.43977400  | 3.04656900  | -0.22432000 |
| C | 3.74250600  | 3.15520600  | -2.13286200 |
| C | 4.29850000  | 1.78718200  | -2.51553400 |
| H | 4.41634900  | 3.95282400  | -2.48410100 |
| H | 2.76904900  | 3.31335600  | -2.60623300 |
| H | 4.46256200  | 1.74000100  | -3.59708500 |
| H | 5.26299800  | 1.60077400  | -2.02481900 |
| H | 3.60726200  | 0.98434300  | -2.23999100 |
| C | 3.21213100  | 4.66635800  | -0.24915300 |
| C | 3.15961800  | 4.80261700  | 1.26897400  |
| H | 2.23862800  | 4.91162900  | -0.68365900 |
| H | 3.94771900  | 5.36943500  | -0.67123500 |
| H | 2.93242800  | 5.83686400  | 1.54782200  |
| H | 2.38630000  | 4.15170800  | 1.69131700  |

|             |             |             |             |
|-------------|-------------|-------------|-------------|
| H           | 4.12168100  | 4.53637700  | 1.72538700  |
| <b>TS26</b> |             |             |             |
| C           | -2.00832300 | 1.11918800  | -0.86394100 |
| C           | -2.30480200 | 2.21326900  | -1.69398400 |
| C           | -0.68192000 | 0.95190600  | -0.40614100 |
| C           | -1.32217100 | 3.12784800  | -2.06341700 |
| H           | -3.32461100 | 2.36600700  | -2.03759800 |
| C           | 0.31347600  | 1.90714100  | -0.76360700 |
| C           | -0.01424400 | 2.98329600  | -1.57929600 |
| H           | -1.56744200 | 3.95846300  | -2.72143800 |
| H           | 0.73623500  | 3.71624300  | -1.85991100 |
| C           | -2.45984400 | -1.17307100 | 0.92637800  |
| C           | -1.04949300 | -1.14827700 | 1.10393800  |
| C           | -3.21378800 | -2.13199800 | 1.62243700  |
| C           | -0.45372000 | -2.18392800 | 1.85884500  |
| C           | -2.61325900 | -3.10030800 | 2.42306000  |
| C           | -1.21905600 | -3.14240500 | 2.50782300  |
| H           | 0.62192000  | -2.25767300 | 1.91523800  |
| H           | -3.22075100 | -3.83190600 | 2.94926700  |
| H           | -0.72588200 | -3.92496400 | 3.07764500  |
| H           | -4.29685200 | -2.12838600 | 1.52402700  |
| Si          | -3.32681600 | -0.10044100 | -0.34372800 |
| C           | -0.20160100 | -0.09401100 | 0.51301500  |
| C           | 1.17713900  | 0.02377700  | 0.73109300  |
| C           | 2.00008900  | -0.32261300 | 1.90063100  |
| C           | 3.32117300  | -0.79464600 | 1.72816700  |
| C           | 4.16176300  | -0.97702100 | 2.82871700  |
| H           | 3.66696900  | -1.05348600 | 0.73257000  |
| C           | 2.40388700  | -0.21584700 | 4.30283000  |
| C           | 3.70975400  | -0.69012700 | 4.11666300  |
| H           | 5.16874600  | -1.35595200 | 2.67524100  |
| H           | 2.04596600  | 0.01084400  | 5.30382200  |
| H           | 4.36413700  | -0.83519900 | 4.97182200  |
| Pd          | 2.11967300  | 1.68905500  | 0.06132400  |
| H           | 1.68055400  | -0.53970700 | -0.42960200 |
| C           | -4.77588600 | 0.82146300  | 0.44490500  |
| C           | -4.59692400 | 2.12863200  | 0.93623800  |
| C           | -6.04381100 | 0.23294700  | 0.61342900  |
| C           | -5.63534700 | 2.81719800  | 1.56650300  |
| H           | -3.63380400 | 2.61899200  | 0.81993300  |
| C           | -7.08593700 | 0.91546500  | 1.24362200  |
| H           | -6.23033300 | -0.77210900 | 0.24591100  |
| C           | -6.88373400 | 2.21173500  | 1.72188600  |

|   |             |             |             |
|---|-------------|-------------|-------------|
| H | -5.46991900 | 3.82675200  | 1.93461700  |
| H | -8.05529500 | 0.43684100  | 1.35825900  |
| H | -7.69414700 | 2.74630400  | 2.21079700  |
| C | -3.85394200 | -1.15743600 | -1.87178800 |
| C | -4.81623600 | -0.33872600 | -2.75865800 |
| C | -2.58413700 | -1.50205000 | -2.68228400 |
| C | -4.53767300 | -2.47990500 | -1.46528500 |
| H | -5.73949300 | -0.06893600 | -2.23338900 |
| H | -4.35007500 | 0.58662400  | -3.11782600 |
| H | -5.09396400 | -0.92473700 | -3.64662900 |
| H | -1.84791400 | -2.05902200 | -2.09480200 |
| H | -2.85643900 | -2.12291400 | -3.54810500 |
| H | -2.08826300 | -0.60284800 | -3.06414400 |
| H | -4.80125100 | -3.04887900 | -2.36838100 |
| H | -3.87682000 | -3.10964300 | -0.86110200 |
| H | -5.46669100 | -2.32594700 | -0.90317700 |
| S | 1.71737600  | -2.47345800 | -1.78499300 |
| C | 2.69273100  | -3.62314800 | -0.68972100 |
| F | 2.46782700  | -4.89185300 | -1.03794700 |
| F | 2.32976600  | -3.45835500 | 0.59533400  |
| F | 4.00460000  | -3.36633600 | -0.79030800 |
| O | 2.09802400  | -2.81167000 | -3.15163000 |
| O | 0.32912900  | -2.62019600 | -1.33914100 |
| O | 2.31327500  | -1.10538100 | -1.35878900 |
| C | 1.56254900  | -0.02883200 | 3.21327800  |
| H | 0.55122900  | 0.34109000  | 3.35444900  |
| N | 3.46320400  | 3.38443500  | -0.58990900 |
| H | 4.33623100  | 3.19813400  | -0.08805100 |
| C | 3.77455800  | 3.28993500  | -2.04260800 |
| C | 4.41607100  | 1.95196200  | -2.39933000 |
| H | 4.43633900  | 4.12162300  | -2.33180700 |
| H | 2.83250600  | 3.41454600  | -2.58495600 |
| H | 4.66275500  | 1.93004800  | -3.46586900 |
| H | 5.34863700  | 1.79979800  | -1.84004200 |
| H | 3.74316500  | 1.11358700  | -2.18802300 |
| C | 3.01736200  | 4.74104000  | -0.18466600 |
| C | 2.83444600  | 4.84461600  | 1.32562500  |
| H | 2.06943600  | 4.93808600  | -0.69366200 |
| H | 3.74206500  | 5.49224100  | -0.53625100 |
| H | 2.52301500  | 5.85791600  | 1.59998100  |
| H | 2.07137100  | 4.13966600  | 1.67300400  |
| H | 3.77062900  | 4.62686800  | 1.85536100  |

**INT34**

|    |             |             |             |
|----|-------------|-------------|-------------|
| C  | -1.92940800 | 1.17930700  | -0.89356900 |
| C  | -2.15821200 | 2.25070800  | -1.75541800 |
| C  | -0.60779100 | 0.97635900  | -0.39806800 |
| C  | -1.12094400 | 3.11892600  | -2.12278000 |
| H  | -3.15962100 | 2.43986500  | -2.13271100 |
| C  | 0.44898200  | 1.87178500  | -0.76428400 |
| C  | 0.16563200  | 2.94601400  | -1.60996400 |
| H  | -1.32259100 | 3.93821800  | -2.80952500 |
| H  | 0.94680600  | 3.64334300  | -1.89601200 |
| C  | -2.49333600 | -1.02846900 | 0.95753300  |
| C  | -1.08253800 | -1.01880400 | 1.17154600  |
| C  | -3.27481000 | -1.94468400 | 1.67124300  |
| C  | -0.51711800 | -2.02239100 | 1.99679100  |
| C  | -2.70327200 | -2.88525000 | 2.52954600  |
| C  | -1.31358800 | -2.94212700 | 2.66241600  |
| H  | 0.55478600  | -2.09939100 | 2.09262600  |
| H  | -3.33530300 | -3.58616000 | 3.06846400  |
| H  | -0.85022000 | -3.70346300 | 3.28262700  |
| H  | -4.35457100 | -1.93617100 | 1.54582900  |
| Si | -3.30532900 | 0.02311300  | -0.36926100 |
| C  | -0.20557200 | -0.04214900 | 0.53720200  |
| C  | 1.24129100  | -0.03066900 | 0.76125900  |
| C  | 1.95056100  | -0.20711100 | 2.04023700  |
| C  | 3.22242300  | -0.82247400 | 2.02539700  |
| C  | 3.98372700  | -0.89800800 | 3.19370400  |
| H  | 3.57423200  | -1.26618200 | 1.09814000  |
| C  | 2.23064400  | 0.23758500  | 4.41593500  |
| C  | 3.49294600  | -0.37224300 | 4.38974000  |
| H  | 4.95582700  | -1.38322900 | 3.16925300  |
| H  | 1.84538600  | 0.64743600  | 5.34602300  |
| H  | 4.08386400  | -0.43767700 | 5.29922900  |
| Pd | 2.24750300  | 1.58773100  | 0.02696700  |
| H  | 1.68369900  | -0.63523200 | -0.05896500 |
| C  | -4.72789500 | 1.01535500  | 0.37598200  |
| C  | -4.51850100 | 2.33311600  | 0.82463400  |
| C  | -6.01126600 | 0.46363100  | 0.55340400  |
| C  | -5.54408700 | 3.06811200  | 1.42268400  |
| H  | -3.54271700 | 2.79567400  | 0.70087900  |
| C  | -7.04009900 | 1.19316000  | 1.15140700  |
| H  | -6.22083000 | -0.54792100 | 0.21715400  |
| C  | -6.80832200 | 2.49941200  | 1.58754100  |
| H  | -5.35602700 | 4.08486600  | 1.75825600  |
| H  | -8.02220200 | 0.74354900  | 1.27341000  |
| H  | -7.60853300 | 3.07029000  | 2.05125600  |

|   |             |             |             |
|---|-------------|-------------|-------------|
| C | -3.83806800 | -1.06235000 | -1.87388700 |
| C | -4.78765700 | -0.24429600 | -2.77566500 |
| C | -2.57572100 | -1.44633200 | -2.67786400 |
| C | -4.54563100 | -2.36049700 | -1.43169900 |
| H | -5.71014300 | 0.04571000  | -2.26028100 |
| H | -4.30840600 | 0.66868500  | -3.14951100 |
| H | -5.06692800 | -0.84248100 | -3.65452600 |
| H | -1.83489200 | -1.98994500 | -2.08468600 |
| H | -2.86322700 | -2.08815200 | -3.52289300 |
| H | -2.07167900 | -0.56583400 | -3.09045000 |
| H | -4.82573800 | -2.94260300 | -2.32084000 |
| H | -3.89218000 | -2.99097900 | -0.82032900 |
| H | -5.46795200 | -2.17667300 | -0.86710300 |
| S | 1.77410200  | -2.49575300 | -1.77577500 |
| C | 2.09901200  | -3.89359200 | -0.59085300 |
| F | 1.21164500  | -4.88481000 | -0.74995400 |
| F | 2.00010400  | -3.45260600 | 0.68959200  |
| F | 3.33196200  | -4.39363100 | -0.75137400 |
| O | 2.00524500  | -3.06566900 | -3.10695000 |
| O | 0.38198200  | -2.10552400 | -1.44053700 |
| O | 2.78763700  | -1.48533500 | -1.32254300 |
| C | 1.47018800  | 0.32700900  | 3.25637200  |
| H | 0.49482800  | 0.80619400  | 3.27356500  |
| N | 3.74065000  | 3.07361600  | -0.80595000 |
| H | 4.60956400  | 2.82908000  | -0.32234100 |
| C | 3.96803700  | 2.80979900  | -2.25503300 |
| C | 4.49443600  | 1.39824700  | -2.49961200 |
| H | 4.67220900  | 3.55627800  | -2.65579700 |
| H | 3.00979200  | 2.95363000  | -2.76421700 |
| H | 4.67567600  | 1.25214800  | -3.56956300 |
| H | 5.44888200  | 1.24036000  | -1.97978700 |
| H | 3.78949300  | 0.62661800  | -2.17044200 |
| C | 3.47493100  | 4.50276700  | -0.51407900 |
| C | 3.34835400  | 4.75743400  | 0.98406600  |
| H | 2.54482700  | 4.77305300  | -1.02349700 |
| H | 4.27398100  | 5.12755600  | -0.94358200 |
| H | 3.16890500  | 5.82080800  | 1.17451100  |
| H | 2.51749100  | 4.18156600  | 1.40633200  |
| H | 4.26648000  | 4.47267800  | 1.51340600  |

**INT35**

|   |            |             |             |
|---|------------|-------------|-------------|
| C | 2.56757300 | -1.02305200 | -1.03363200 |
| C | 2.96416300 | -2.26474200 | -1.55652600 |
| C | 1.19491600 | -0.72909800 | -1.06621800 |

|    |             |             |             |
|----|-------------|-------------|-------------|
| C  | 2.02294900  | -3.17516200 | -2.04893400 |
| H  | 4.01670400  | -2.53742000 | -1.55640900 |
| C  | 0.23685600  | -1.66102000 | -1.48246600 |
| C  | 0.65011500  | -2.89508200 | -1.98334100 |
| H  | 2.35691200  | -4.12298400 | -2.46472400 |
| H  | -0.06186200 | -3.64149700 | -2.33087200 |
| C  | 2.44424600  | 1.04963100  | 1.01199600  |
| C  | 1.05783200  | 1.09730400  | 0.71385700  |
| C  | 2.87766900  | 1.58683400  | 2.23455600  |
| C  | 0.15064400  | 1.63622800  | 1.64094900  |
| C  | 1.97471700  | 2.13049200  | 3.14931100  |
| C  | 0.60919400  | 2.14315400  | 2.85346400  |
| H  | -0.90987000 | 1.65352600  | 1.42481200  |
| H  | 2.33256900  | 2.52757000  | 4.09569700  |
| H  | -0.10713800 | 2.54113000  | 3.56610900  |
| H  | 3.93564700  | 1.55450100  | 2.48535900  |
| Si | 3.66555700  | 0.24658300  | -0.18355000 |
| C  | 0.58299400  | 0.54805600  | -0.58047200 |
| C  | -0.36733000 | 1.13353900  | -1.40771100 |
| Pd | -1.51388900 | -0.92407200 | -0.91118700 |
| C  | 5.00147800  | -0.65326400 | 0.79800200  |
| C  | 4.64378900  | -1.84888700 | 1.45366400  |
| C  | 6.32060700  | -0.19366500 | 0.96159800  |
| C  | 5.56064400  | -2.55294300 | 2.23452200  |
| H  | 3.63365000  | -2.23771300 | 1.34905400  |
| C  | 7.24371400  | -0.89414600 | 1.74186200  |
| H  | 6.64390400  | 0.72191600  | 0.47684900  |
| C  | 6.86563800  | -2.07625400 | 2.38003600  |
| H  | 5.25769500  | -3.47252100 | 2.72868100  |
| H  | 8.25712700  | -0.51604100 | 1.84982400  |
| H  | 7.58264800  | -2.62278800 | 2.98715600  |
| C  | 4.33052400  | 1.52131400  | -1.45837100 |
| C  | 5.37917800  | 0.84951300  | -2.36950400 |
| C  | 3.15213800  | 2.00303500  | -2.33383700 |
| C  | 4.93821500  | 2.75182100  | -0.75196300 |
| H  | 6.25488000  | 0.49957900  | -1.81236300 |
| H  | 4.95462700  | -0.01294000 | -2.89881000 |
| H  | 5.73185200  | 1.56074700  | -3.13031400 |
| H  | 2.37826600  | 2.50515800  | -1.74248400 |
| H  | 3.51247400  | 2.72633100  | -3.07910700 |
| H  | 2.67785200  | 1.17666800  | -2.87490000 |
| H  | 5.26246400  | 3.49186000  | -1.49773400 |
| H  | 4.20688900  | 3.23929600  | -0.09644900 |
| H  | 5.81381200  | 2.50335100  | -0.14249700 |

|   |             |             |             |
|---|-------------|-------------|-------------|
| S | -3.48356800 | 0.44303900  | 1.21377300  |
| C | -5.21465500 | -0.09048800 | 1.63703300  |
| F | -6.11065000 | 0.54803200  | 0.87691800  |
| F | -5.47962900 | 0.15201000  | 2.92357100  |
| F | -5.34856000 | -1.41955900 | 1.42015700  |
| O | -3.42996900 | 0.01230500  | -0.24506700 |
| O | -3.45002300 | 1.89504900  | 1.41298900  |
| O | -2.61392900 | -0.38304400 | 2.07379000  |
| N | -2.44129700 | -2.86065700 | -0.68084500 |
| H | -1.83206400 | -3.50475300 | -1.18615200 |
| C | -2.46997100 | -3.29835000 | 0.74862500  |
| C | -1.09388900 | -3.25839400 | 1.40119200  |
| H | -2.88627800 | -4.31664400 | 0.77904100  |
| H | -3.15334900 | -2.63196300 | 1.27513600  |
| H | -1.15003300 | -3.72192800 | 2.39176000  |
| H | -0.34660000 | -3.79963800 | 0.80871400  |
| H | -0.76194600 | -2.22477000 | 1.53036500  |
| C | -3.79440900 | -2.91699000 | -1.30131300 |
| C | -3.75635100 | -2.59039000 | -2.78915100 |
| H | -4.41646400 | -2.20230800 | -0.76094700 |
| H | -4.20889600 | -3.92337500 | -1.14036600 |
| H | -4.75662900 | -2.70437600 | -3.21974700 |
| H | -3.42747500 | -1.55923000 | -2.95528600 |
| H | -3.07708300 | -3.26010600 | -3.33180700 |
| C | -1.03944100 | 2.44673200  | -1.25985500 |
| C | -2.36642000 | 2.59175400  | -1.69371600 |
| C | -0.35937400 | 3.57851400  | -0.77911700 |
| C | -3.00810800 | 3.82563000  | -1.61662600 |
| H | -2.90994600 | 1.72000800  | -2.04142700 |
| C | -0.99865800 | 4.81472700  | -0.71621600 |
| H | 0.67099800  | 3.49129500  | -0.45247200 |
| C | -2.32752100 | 4.94160500  | -1.12742300 |
| H | -4.04514300 | 3.91082700  | -1.92842100 |
| H | -0.45712400 | 5.67967800  | -0.34264800 |
| H | -2.82860600 | 5.90379800  | -1.06544600 |
| H | -0.43826600 | 0.71032400  | -2.41244600 |

**TS27**

|   |             |             |             |
|---|-------------|-------------|-------------|
| C | -2.62130900 | -1.18438800 | 0.04714300  |
| C | -2.88061600 | -2.52279500 | -0.21431300 |
| C | -1.27784400 | -0.69906600 | -0.07597300 |
| C | -1.85534000 | -3.38680700 | -0.63957300 |
| H | -3.89635700 | -2.90262600 | -0.13691700 |
| C | -0.21903100 | -1.60159700 | -0.42637900 |

|    |             |             |             |
|----|-------------|-------------|-------------|
| C  | -0.55296200 | -2.92107700 | -0.77284000 |
| H  | -2.08550600 | -4.42598000 | -0.86485600 |
| H  | 0.21804900  | -3.59870700 | -1.11951800 |
| C  | -3.21346500 | 1.65594800  | 0.16098900  |
| C  | -1.80099800 | 1.82893400  | 0.01850600  |
| C  | -4.05113000 | 2.77827400  | 0.16488000  |
| C  | -1.31064900 | 3.15995500  | -0.01284100 |
| C  | -3.54451300 | 4.07419400  | 0.07262100  |
| C  | -2.16171800 | 4.25677100  | 0.01412300  |
| H  | -0.24966200 | 3.34659900  | -0.06527600 |
| H  | -4.21621500 | 4.92839200  | 0.06506500  |
| H  | -1.73968300 | 5.25697100  | -0.02003100 |
| H  | -5.12622700 | 2.63454800  | 0.24788900  |
| Si | -3.96224500 | -0.00636300 | 0.57796100  |
| C  | -0.87046700 | 0.68264500  | -0.01593500 |
| C  | 0.59694200  | 0.85155100  | 0.01131300  |
| C  | 1.28458300  | 1.91270500  | -0.76058500 |
| C  | 2.32662100  | 2.66964900  | -0.19760800 |
| C  | 3.00085500  | 3.62113000  | -0.96040200 |
| H  | 2.61999600  | 2.48357200  | 0.82976700  |
| C  | 1.62356800  | 3.07821000  | -2.87169700 |
| C  | 2.64963100  | 3.83574500  | -2.29547000 |
| H  | 3.81575600  | 4.18229800  | -0.51282600 |
| H  | 1.35449900  | 3.22781200  | -3.91418400 |
| H  | 3.18014200  | 4.57587900  | -2.88844600 |
| Pd | 1.61922600  | -0.92525000 | -0.43048400 |
| H  | 0.94387700  | 0.74891200  | 1.05489800  |
| C  | -5.53779100 | -0.31910900 | -0.40487700 |
| C  | -5.41649600 | -0.70532400 | -1.75497500 |
| C  | -6.83618100 | -0.15193400 | 0.11018800  |
| C  | -6.54046700 | -0.91245400 | -2.55495300 |
| H  | -4.42902100 | -0.85434100 | -2.18532900 |
| C  | -7.96520500 | -0.35880600 | -0.68573300 |
| H  | -6.97953000 | 0.13847800  | 1.14598900  |
| C  | -7.81949300 | -0.73914800 | -2.02067900 |
| H  | -6.41891300 | -1.21091800 | -3.59297800 |
| H  | -8.95708900 | -0.22508400 | -0.26187600 |
| H  | -8.69701900 | -0.90160100 | -2.64093000 |
| C  | -4.15905400 | -0.12964500 | 2.49230700  |
| C  | -4.81849400 | -1.47852700 | 2.84815600  |
| C  | -2.74946000 | -0.07399800 | 3.12445800  |
| C  | -4.98978900 | 1.03621900  | 3.06788600  |
| H  | -5.83241100 | -1.56528900 | 2.44165500  |
| H  | -4.23166600 | -2.32502700 | 2.47080200  |



|   |             |             |             |
|---|-------------|-------------|-------------|
| H | -4.88690000 | -1.58804500 | 3.93979800  |
| H | -2.22603300 | 0.85737000  | 2.87657700  |
| H | -2.83120000 | -0.12288900 | 4.21917900  |
| H | -2.11936500 | -0.90977500 | 2.80205200  |
| H | -5.04672800 | 0.94543200  | 4.16190700  |
| H | -4.53574800 | 2.00722000  | 2.84102900  |
| H | -6.01915600 | 1.05332300  | 2.69368300  |
| S | 4.25321200  | -0.10156000 | 1.12172200  |
| C | 5.69504200  | 1.06588900  | 0.97195400  |
| F | 6.41917200  | 1.03657600  | 2.09669500  |
| F | 5.26531500  | 2.32310600  | 0.77425000  |
| F | 6.47652100  | 0.71416900  | -0.05664300 |
| O | 4.85401400  | -1.41943000 | 1.41417200  |
| O | 3.37795700  | 0.49250800  | 2.14797200  |
| O | 3.67851100  | -0.03188500 | -0.27905000 |
| C | 0.95412600  | 2.12150700  | -2.11540900 |
| H | 0.16681300  | 1.52091800  | -2.56460500 |
| N | 2.87877100  | -2.80056300 | -0.72310500 |
| H | 3.72422100  | -2.36291500 | -0.34697400 |
| C | 2.63333100  | -4.00515800 | 0.10872100  |
| C | 2.31834600  | -3.65567300 | 1.55936900  |
| H | 3.51884000  | -4.65773100 | 0.05859300  |
| H | 1.80642400  | -4.56559300 | -0.34084900 |
| H | 2.22464100  | -4.57384800 | 2.15042500  |
| H | 3.11378700  | -3.04056200 | 1.98949000  |
| H | 1.37786900  | -3.10011300 | 1.62816800  |
| C | 3.14085300  | -3.14625700 | -2.13925000 |
| C | 3.54076300  | -1.92621400 | -2.96500800 |
| H | 2.22690700  | -3.59840800 | -2.54333500 |
| H | 3.93066700  | -3.91291400 | -2.19103200 |
| H | 3.81013900  | -2.23371400 | -3.98141300 |
| H | 2.71672100  | -1.20634300 | -3.02770100 |
| H | 4.39326500  | -1.40812600 | -2.51503800 |

**TS28**

|    |            |             |             |
|----|------------|-------------|-------------|
| C  | 1.13177700 | -2.30332400 | -1.86088600 |
| C  | 1.37399800 | -1.13132900 | -1.12706000 |
| C  | 2.63574800 | -0.91667300 | -0.53189200 |
| C  | 3.54147900 | -2.02613600 | -0.49270200 |
| C  | 3.25995400 | -3.21146200 | -1.19711400 |
| C  | 2.08107900 | -3.32480800 | -1.92271000 |
| Si | 3.21519400 | 0.77803600  | 0.13135300  |
| H  | 0.17458200 | -2.46132700 | -2.34805700 |
| H  | 3.97309900 | -4.02882400 | -1.16144800 |

|   |             |             |             |
|---|-------------|-------------|-------------|
| H | 1.86687600  | -4.23179800 | -2.48153400 |
| C | 2.15016600  | 2.10024900  | -0.75133700 |
| C | 2.54924000  | 3.45076200  | -0.71122800 |
| C | 1.03059000  | 1.75312800  | -1.56053200 |
| C | 1.89147100  | 4.43071100  | -1.45387800 |
| H | 3.40964900  | 3.74978000  | -0.12104200 |
| C | 0.34451500  | 2.78361300  | -2.26227200 |
| H | 1.32796500  | 0.89640700  | -2.51443100 |
| C | 0.77923500  | 4.10007300  | -2.23819900 |
| H | 2.24211300  | 5.45888200  | -1.41891200 |
| H | -0.51098500 | 2.51202900  | -2.87853000 |
| H | 0.25715900  | 4.86825700  | -2.80152500 |
| C | 4.74194700  | -1.97350300 | 0.27276800  |
| C | 5.77934200  | -1.94609800 | 0.90708600  |
| C | 7.01007100  | -1.81374900 | 1.61201200  |
| C | 7.55668900  | -2.89503700 | 2.32984300  |
| C | 7.69610900  | -0.58158300 | 1.58715700  |
| C | 8.76177900  | -2.74344500 | 3.01134100  |
| H | 7.02905500  | -3.84388000 | 2.34649700  |
| C | 8.90021100  | -0.44265600 | 2.27219100  |
| H | 7.27973200  | 0.24769700  | 1.02639300  |
| C | 9.43577100  | -1.51892200 | 2.98570000  |
| H | 9.17686700  | -3.58175600 | 3.56362800  |
| H | 9.42399300  | 0.50888800  | 2.24671100  |
| H | 10.37564600 | -1.40517000 | 3.51844800  |
| P | -1.90810100 | 1.66244700  | 0.30068900  |
| P | -1.61708900 | -1.75523100 | -0.05352300 |
| C | 0.93556800  | -5.49776300 | 0.99078200  |
| C | -0.10614500 | -5.62690200 | 0.07190000  |
| C | -0.91050500 | -4.52997000 | -0.24545100 |
| C | -0.68025300 | -3.28704600 | 0.35969700  |
| C | 0.37305800  | -3.16731600 | 1.28002100  |
| C | 1.17311300  | -4.26164200 | 1.59716700  |
| H | -1.69494000 | -4.64916100 | -0.98305100 |
| H | 0.58488700  | -2.20768300 | 1.73235800  |
| C | -1.84341100 | 6.30218500  | 0.25395600  |
| C | -3.01173700 | 5.65009200  | -0.14361800 |
| C | -3.05698000 | 4.25489300  | -0.19640500 |
| C | -1.92146900 | 3.49713900  | 0.12880500  |
| C | -0.75407500 | 4.16157900  | 0.53182700  |
| C | -0.71594000 | 5.55242000  | 0.59698000  |
| H | -3.98333900 | 3.76682900  | -0.47997600 |
| H | 0.13381600  | 3.59146900  | 0.78389000  |
| C | -2.28795400 | 1.57643000  | 4.92780500  |

|   |             |             |             |
|---|-------------|-------------|-------------|
| C | -3.16479800 | 2.36156200  | 4.17317100  |
| C | -3.07406100 | 2.37476000  | 2.78377500  |
| C | -2.11489600 | 1.58409500  | 2.12982400  |
| C | -1.24058800 | 0.80328600  | 2.89286300  |
| C | -1.32323300 | 0.80008700  | 4.28577900  |
| H | -3.75035900 | 2.99912100  | 2.20888800  |
| H | -0.50082100 | 0.18855000  | 2.39588300  |
| C | -4.23550900 | -2.85499600 | -3.72359900 |
| C | -4.42482800 | -3.52029000 | -2.50928500 |
| C | -3.64725200 | -3.19114200 | -1.40060700 |
| C | -2.65910900 | -2.19727200 | -1.49819500 |
| C | -2.49421600 | -1.52021800 | -2.71238900 |
| C | -3.27261300 | -1.84990100 | -3.82176300 |
| H | -3.82496600 | -3.68888800 | -0.45180700 |
| H | -1.78329700 | -0.70402200 | -2.76844600 |
| H | -7.33086700 | 1.51236600  | 3.46888600  |
| C | -3.90644400 | -0.66937200 | 1.24136400  |
| C | -2.83814800 | -1.56685300 | 1.32873400  |
| C | -2.60068900 | -2.25920600 | 2.54801700  |
| H | -1.79155400 | -2.97611100 | 2.61102100  |
| C | -3.37912500 | -2.03205800 | 3.65595000  |
| H | -3.17710400 | -2.56647200 | 4.58070000  |
| C | -4.44025100 | -1.09555000 | 3.62109500  |
| C | -4.72392900 | -0.41994500 | 2.39102100  |
| H | -6.01533700 | 1.04575300  | 1.44759500  |
| C | -5.79003800 | 0.52267400  | 2.37006100  |
| C | -6.52439500 | 0.78550300  | 3.50448600  |
| H | -6.82349100 | 0.33730600  | 5.60741000  |
| C | -6.23654200 | 0.11865900  | 4.72007300  |
| H | -4.98770200 | -1.32206000 | 5.70105800  |
| C | -5.21704900 | -0.80411900 | 4.77339500  |
| H | -8.39882300 | -1.63654200 | -2.96276000 |
| C | -4.75167700 | 1.16343800  | -2.58125500 |
| H | -4.93255500 | 1.58211500  | -3.56816200 |
| C | -3.70049500 | 1.61162100  | -1.82343400 |
| H | -3.05149100 | 2.38833300  | -2.21644200 |
| C | -3.44964400 | 1.08154200  | -0.52259700 |
| C | -4.23100700 | 0.03532300  | -0.04172200 |
| C | -5.35897800 | -0.42317600 | -0.80864500 |
| C | -5.62082900 | 0.15410000  | -2.09255700 |
| H | -6.90721300 | 0.14070800  | -3.83002600 |
| C | -6.72477400 | -0.30633900 | -2.85602500 |
| C | -7.55235700 | -1.29547400 | -2.37382600 |
| H | -7.95290100 | -2.65018000 | -0.72922900 |

|    |             |             |             |
|----|-------------|-------------|-------------|
| C  | -7.29857800 | -1.86948400 | -1.10660900 |
| H  | -6.04327800 | -1.90793600 | 0.61726500  |
| C  | -6.22712900 | -1.45132800 | -0.34787200 |
| H  | 1.56428400  | -6.35141600 | 1.22708700  |
| H  | -1.81368200 | 7.38703000  | 0.30154900  |
| H  | -2.35836400 | 1.57277100  | 6.01173000  |
| H  | -4.85079700 | -3.10738100 | -4.58206100 |
| H  | -0.29371000 | -6.58302500 | -0.40871600 |
| H  | 1.99095800  | -4.14232200 | 2.30175900  |
| H  | -3.89676200 | 6.22466700  | -0.40238700 |
| H  | 0.19865200  | 6.04931700  | 0.90779900  |
| H  | -3.14118600 | -1.30673500 | -4.75358500 |
| H  | -5.19415500 | -4.28100900 | -2.41934500 |
| H  | -0.63652600 | 0.18713200  | 4.86266500  |
| H  | -3.92274300 | 2.96150100  | 4.66770100  |
| Pd | -0.16163100 | 0.16118700  | -0.63545900 |
| C  | 4.97017900  | 1.18013300  | -0.47924200 |
| C  | 5.59080100  | 0.45145400  | -1.51041200 |
| C  | 5.67437300  | 2.28946500  | 0.02849200  |
| C  | 6.85289600  | 0.79516100  | -1.99605200 |
| H  | 5.08905400  | -0.41089700 | -1.93792300 |
| C  | 6.93585100  | 2.64593200  | -0.45396700 |
| H  | 5.24528000  | 2.89174100  | 0.82411300  |
| C  | 7.53309000  | 1.89366600  | -1.46673500 |
| H  | 7.30864000  | 0.19997800  | -2.78291700 |
| H  | 7.45233600  | 3.50475400  | -0.03357200 |
| H  | 8.51845000  | 2.15983500  | -1.83894900 |
| C  | 3.04734500  | 0.90211200  | 2.07200100  |
| C  | 2.30191500  | -0.35823800 | 2.55389300  |
| C  | 4.40573800  | 0.94765300  | 2.80265800  |
| C  | 2.21640500  | 2.13948200  | 2.47232600  |
| H  | 1.34007700  | -0.46028800 | 2.04532200  |
| H  | 2.87885800  | -1.26945500 | 2.36293000  |
| H  | 2.10795000  | -0.29560200 | 3.63423600  |
| H  | 4.94998700  | 1.87877100  | 2.62473500  |
| H  | 4.23639800  | 0.87737000  | 3.88641200  |
| H  | 5.05843200  | 0.11974800  | 2.51442000  |
| H  | 2.10525600  | 2.18019200  | 3.56480500  |
| H  | 2.68656400  | 3.07775700  | 2.15542100  |
| H  | 1.20817200  | 2.10972100  | 2.04603400  |
| N  | 1.76947100  | 0.36531300  | -3.79082100 |
| C  | 0.58416600  | -0.24198100 | -4.42938500 |
| C  | 2.42232600  | 1.41231200  | -4.60730800 |
| H  | 2.43155800  | -0.36336000 | -3.52129000 |

|   |             |             |             |
|---|-------------|-------------|-------------|
| H | 0.03366200  | 0.56676200  | -4.92298000 |
| H | -0.04869000 | -0.62301700 | -3.62821700 |
| H | 1.75349500  | 2.28100100  | -4.58748500 |
| H | 2.49782700  | 1.07847500  | -5.65107200 |
| C | 3.79487000  | 1.78948800  | -4.06733800 |
| H | 4.48209700  | 0.93740100  | -4.09135600 |
| H | 4.22965600  | 2.58510300  | -4.68041200 |
| H | 3.73654900  | 2.14646300  | -3.03699000 |
| C | 0.91469700  | -1.36611800 | -5.40950100 |
| H | 1.43434100  | -2.17944000 | -4.89000300 |
| H | -0.00563700 | -1.77575300 | -5.83966200 |
| H | 1.54769400  | -1.01917400 | -6.23307100 |

### INT36

|    |             |             |             |
|----|-------------|-------------|-------------|
| C  | 1.13127600  | -0.14452800 | -2.91038900 |
| C  | 1.37899200  | 0.12198900  | -1.54965700 |
| C  | 2.64704000  | -0.21175800 | -1.01058200 |
| C  | 3.50904700  | -1.05078300 | -1.78209000 |
| C  | 3.21916900  | -1.32828400 | -3.13238200 |
| C  | 2.06009500  | -0.82206000 | -3.70782900 |
| Si | 3.21260000  | 0.50341800  | 0.66597200  |
| H  | 0.17297900  | 0.11682500  | -3.35185600 |
| H  | 3.90136300  | -1.94825400 | -3.70554200 |
| H  | 1.83665200  | -1.02348300 | -4.75249800 |
| C  | 2.23203600  | 2.13976100  | 0.76739000  |
| C  | 2.85501500  | 3.34515500  | 1.16484900  |
| C  | 0.89687900  | 2.19565600  | 0.30114800  |
| C  | 2.20979900  | 4.57899900  | 1.05999800  |
| H  | 3.87506400  | 3.32692500  | 1.53672100  |
| C  | 0.26347900  | 3.45087000  | 0.18517600  |
| H  | 1.96818100  | 2.84197900  | -1.45818500 |
| C  | 0.91145000  | 4.63440000  | 0.54710900  |
| H  | 2.71941500  | 5.48791400  | 1.36884700  |
| H  | -0.75940700 | 3.50775600  | -0.18010300 |
| H  | 0.39649500  | 5.58776700  | 0.45311100  |
| C  | 4.65558600  | -1.65427000 | -1.18870400 |
| C  | 5.62915700  | -2.15418400 | -0.65780600 |
| C  | 6.79305300  | -2.64889100 | -0.00176700 |
| C  | 7.28925800  | -3.93767100 | -0.27836400 |
| C  | 7.46443500  | -1.83606100 | 0.93578900  |
| C  | 8.42870800  | -4.40329400 | 0.37312900  |
| H  | 6.77351100  | -4.56210500 | -1.00161500 |
| C  | 8.60289400  | -2.31276900 | 1.58021800  |
| H  | 7.08955500  | -0.83990600 | 1.14267300  |

|   |             |             |             |
|---|-------------|-------------|-------------|
| C | 9.08769400  | -3.59438600 | 1.30358300  |
| H | 8.80404900  | -5.39916800 | 0.15523100  |
| H | 9.11482700  | -1.68003700 | 2.29992200  |
| H | 9.97609200  | -3.96149500 | 1.80965400  |
| P | -1.90535500 | 0.92053500  | 1.47240800  |
| P | -1.64370300 | -1.19000700 | -1.28458500 |
| C | 0.91952600  | -4.47694100 | -3.34618200 |
| C | -0.14791700 | -3.91709300 | -4.04900500 |
| C | -0.95863300 | -2.94913500 | -3.45145800 |
| C | -0.70878900 | -2.52990600 | -2.13752400 |
| C | 0.37206900  | -3.09567900 | -1.44196100 |
| C | 1.17736900  | -4.06380600 | -2.03684900 |
| H | -1.76712400 | -2.51214800 | -4.02565000 |
| H | 0.60149500  | -2.75959700 | -0.43925000 |
| C | -1.72034100 | 4.48450900  | 4.45494400  |
| C | -2.95274500 | 4.11559700  | 3.91170300  |
| C | -3.02805900 | 3.07549000  | 2.98429900  |
| C | -1.86694600 | 2.39569000  | 2.57841500  |
| C | -0.63520800 | 2.76877900  | 3.13842700  |
| C | -0.56381800 | 3.80453400  | 4.06947900  |
| H | -3.99581100 | 2.79847000  | 2.57824500  |
| H | 0.27350500  | 2.26017100  | 2.84241400  |
| C | -2.43745400 | -2.43532000 | 4.63548200  |
| C | -3.24762000 | -1.29802900 | 4.69061400  |
| C | -3.10370900 | -0.28804900 | 3.74210200  |
| C | -2.15511800 | -0.41280400 | 2.71476800  |
| C | -1.34450400 | -1.55287800 | 2.67007800  |
| C | -1.48258100 | -2.55910400 | 3.62575100  |
| H | -3.73308000 | 0.59354400  | 3.80219200  |
| H | -0.61492800 | -1.65945700 | 1.87858700  |
| C | -4.18807400 | 0.83659100  | -4.60033600 |
| C | -4.43539300 | -0.49521800 | -4.25792500 |
| C | -3.68360800 | -1.11396000 | -3.26028700 |
| C | -2.66433100 | -0.41039400 | -2.59879200 |
| C | -2.43678200 | 0.93039100  | -2.93801400 |
| C | -3.19047700 | 1.55050600  | -3.93449400 |
| H | -3.90695500 | -2.13792100 | -2.97518000 |
| H | -1.69345800 | 1.49296600  | -2.38207100 |
| H | -7.30522300 | -1.48825300 | 3.56765400  |
| C | -3.90803000 | -1.37735900 | 0.42067900  |
| C | -2.86648200 | -2.06880800 | -0.20435800 |
| C | -2.63541100 | -3.43352500 | 0.12171700  |
| H | -1.84098100 | -3.97675700 | -0.37617700 |
| C | -3.39983100 | -4.07741700 | 1.06389600  |

|    |             |             |             |
|----|-------------|-------------|-------------|
| H  | -3.20430200 | -5.11975600 | 1.30291400  |
| C  | -4.44338800 | -3.40140500 | 1.74167600  |
| C  | -4.71631800 | -2.03739800 | 1.40230200  |
| H  | -5.98866300 | -0.33698500 | 1.84162200  |
| C  | -5.77129400 | -1.37067800 | 2.08623500  |
| C  | -6.50608200 | -2.01616100 | 3.05500900  |
| H  | -6.81352000 | -3.85848300 | 4.16137000  |
| C  | -6.22722500 | -3.36254200 | 3.39320600  |
| H  | -4.99589900 | -5.07285900 | 2.99808500  |
| C  | -5.21756300 | -4.03864300 | 2.74732500  |
| H  | -8.38822100 | 0.97871900  | -3.19192000 |
| C  | -4.76866200 | 2.65670400  | -0.87395000 |
| H  | -4.95806100 | 3.66104900  | -1.24495600 |
| C  | -3.72267700 | 2.42332100  | -0.01873100 |
| H  | -3.09491200 | 3.25239600  | 0.29092000  |
| C  | -3.45525900 | 1.11563600  | 0.48604300  |
| C  | -4.22990500 | 0.04160700  | 0.05475800  |
| C  | -5.35787700 | 0.27607500  | -0.80785700 |
| C  | -5.62505800 | 1.60130300  | -1.27879400 |
| H  | -6.91052700 | 2.84154900  | -2.49662600 |
| C  | -6.72475900 | 1.82924700  | -2.14635000 |
| C  | -7.54490700 | 0.79324600  | -2.53297000 |
| H  | -7.93778700 | -1.33313200 | -2.37389200 |
| C  | -7.28821900 | -0.51768600 | -2.06851400 |
| H  | -6.03514600 | -1.78321600 | -0.89542600 |
| C  | -6.22068600 | -0.77137400 | -1.23517600 |
| H  | 1.55199200  | -5.22379000 | -3.81767700 |
| H  | -1.66351800 | 5.29460200  | 5.17655800  |
| H  | -2.55239500 | -3.22032200 | 5.37734400  |
| H  | -4.78449800 | 1.31903800  | -5.36908300 |
| H  | -0.35189800 | -4.22901700 | -5.06966300 |
| H  | 2.01629200  | -4.47722900 | -1.48452500 |
| H  | -3.85954100 | 4.63308100  | 4.21228300  |
| H  | 0.40010100  | 4.08234800  | 4.48603200  |
| H  | -3.01612900 | 2.59658700  | -4.17339000 |
| H  | -5.23085200 | -1.04525600 | -4.75118400 |
| H  | -0.84902200 | -3.43993800 | 3.57305400  |
| H  | -3.99727400 | -1.19998900 | 5.47004000  |
| Pd | -0.18331200 | 0.54466400  | -0.23313300 |
| C  | 5.02654000  | 1.07702700  | 0.62606100  |
| C  | 5.78668600  | 1.17338500  | -0.55334300 |
| C  | 5.64027600  | 1.52133600  | 1.81483100  |
| C  | 7.09592500  | 1.65812400  | -0.54782300 |
| H  | 5.36074800  | 0.84774600  | -1.49624600 |

|   |             |             |             |
|---|-------------|-------------|-------------|
| C | 6.94929200  | 2.00938100  | 1.83246000  |
| H | 5.09005800  | 1.49559700  | 2.75191900  |
| C | 7.68573000  | 2.07213200  | 0.64802600  |
| H | 7.65980000  | 1.70019300  | -1.47608400 |
| H | 7.39212400  | 2.33605900  | 2.76958700  |
| H | 8.70785000  | 2.44037500  | 0.65679500  |
| C | 2.88060300  | -0.73308400 | 2.13278400  |
| C | 2.11478200  | -1.94403900 | 1.56443700  |
| C | 4.17220600  | -1.27212300 | 2.78291600  |
| C | 2.00838900  | -0.05450700 | 3.20822400  |
| H | 1.20361200  | -1.62338300 | 1.05283200  |
| H | 2.72268600  | -2.50425600 | 0.84512700  |
| H | 1.82703700  | -2.62772200 | 2.37597500  |
| H | 4.72445200  | -0.50433500 | 3.33071700  |
| H | 3.91222400  | -2.05807600 | 3.50603200  |
| H | 4.85229300  | -1.71146700 | 2.04715200  |
| H | 1.81795700  | -0.74817500 | 4.03910300  |
| H | 2.48606300  | 0.84095100  | 3.62529700  |
| H | 1.03545300  | 0.24189100  | 2.80477200  |
| N | 2.09711100  | 3.01501000  | -2.47311400 |
| C | 0.72791600  | 3.20556700  | -3.07368600 |
| C | 3.05518900  | 4.15725700  | -2.67793300 |
| H | 2.48173700  | 2.12742500  | -2.82320500 |
| H | 0.39460500  | 4.20092300  | -2.77110300 |
| H | 0.09932300  | 2.46828000  | -2.57629100 |
| H | 2.62965200  | 4.99861900  | -2.12538600 |
| H | 3.05232900  | 4.39635100  | -3.74381000 |
| C | 4.44780000  | 3.80465100  | -2.18115800 |
| H | 4.86965600  | 2.96078700  | -2.73637900 |
| H | 5.11042600  | 4.66375900  | -2.32176800 |
| H | 4.43996100  | 3.54837600  | -1.11934300 |
| C | 0.72458300  | 3.01170500  | -4.58257400 |
| H | 1.11196100  | 2.02147600  | -4.84476000 |
| H | -0.30710400 | 3.06820700  | -4.94309500 |
| H | 1.30546200  | 3.77417100  | -5.11039600 |

### TS29

|    |             |             |            |
|----|-------------|-------------|------------|
| C  | -1.12969800 | -1.83269100 | 3.44599600 |
| C  | -1.68330800 | -1.77861200 | 2.15817700 |
| C  | -2.63415100 | -0.80399900 | 1.78370200 |
| C  | -2.81159800 | 0.28088000  | 2.68979400 |
| C  | -2.25561300 | 0.22428900  | 3.98357100 |
| C  | -1.46984700 | -0.85431500 | 4.37858800 |
| Si | -3.93163100 | -1.20731600 | 0.43526400 |



|   |             |             |             |
|---|-------------|-------------|-------------|
| C | -3.38571200 | -2.86603300 | -0.29619700 |
| C | -2.22786200 | -3.52098200 | 0.14827800  |
| C | -4.16056400 | -3.53558000 | -1.26207100 |
| C | -3.80754300 | -4.80607000 | -1.71477200 |
| C | -2.68033200 | -5.45544900 | -1.20378800 |
| C | -1.88160000 | -4.81347200 | -0.25917600 |
| H | -0.41675100 | -2.60801000 | 3.70486100  |
| H | -2.42496700 | 1.05431500  | 4.66171000  |
| H | -1.05307700 | -0.88577900 | 5.38054800  |
| H | -1.93139400 | -2.96595900 | 1.46839800  |
| H | -5.03426200 | -3.04837900 | -1.68559800 |
| H | -4.40840700 | -5.29070800 | -2.47954300 |
| H | -2.39679000 | -6.43621600 | -1.57259000 |
| H | -0.96689600 | -5.28105300 | 0.08950500  |
| O | -0.18248900 | -4.54036100 | -3.18489100 |
| S | 0.46784400  | -3.32399300 | -2.68620600 |
| O | 1.70987100  | -2.88074500 | -3.33847000 |
| O | 0.58170700  | -3.28909300 | -1.17104400 |
| C | -0.75137500 | -1.94713900 | -3.06269800 |
| F | -0.56337700 | -1.49521100 | -4.30642700 |
| F | -0.57368800 | -0.90968900 | -2.21049700 |
| F | -2.01365000 | -2.36785300 | -2.94038900 |
| C | -4.06215500 | 0.05083800  | -0.95149200 |
| C | -5.24842000 | 0.20266200  | -1.69489400 |
| C | -2.93528400 | 0.79023900  | -1.35449200 |
| C | -5.30833800 | 1.05576900  | -2.79941500 |
| H | -6.14292300 | -0.34457000 | -1.41463900 |
| C | -2.98781700 | 1.63800300  | -2.46183000 |
| H | -2.00100100 | 0.70161700  | -0.80749900 |
| C | -4.17435200 | 1.77290900  | -3.18533400 |
| H | -6.23718000 | 1.15675200  | -3.35523500 |
| H | -2.10767900 | 2.19677700  | -2.75629200 |
| H | -4.21169500 | 2.43727800  | -4.04465300 |
| C | -5.60071200 | -1.51763000 | 1.39459700  |
| C | -6.31887200 | -0.19966500 | 1.75566100  |
| C | -6.58379200 | -2.39574400 | 0.58476500  |
| C | -5.27399100 | -2.28799500 | 2.69633300  |
| H | -5.73047300 | 0.41949900  | 2.43601000  |
| H | -6.54134100 | 0.40657200  | 0.87056600  |
| H | -7.27284600 | -0.42450100 | 2.25445400  |
| H | -6.17976400 | -3.39301300 | 0.38912600  |
| H | -7.51019300 | -2.52426900 | 1.16246800  |
| H | -6.86767300 | -1.95281800 | -0.37636700 |
| H | -6.20621600 | -2.55039000 | 3.21647700  |

|   |             |             |             |
|---|-------------|-------------|-------------|
| H | -4.73801400 | -3.22354500 | 2.49167700  |
| H | -4.66609500 | -1.69602100 | 3.38785000  |
| C | -3.45747200 | 1.47209300  | 2.25742700  |
| C | -3.90281600 | 2.50899600  | 1.80406200  |
| C | -4.41477100 | 3.68665200  | 1.19337900  |
| C | -4.97824100 | 3.61149600  | -0.09650200 |
| C | -4.31870300 | 4.93886200  | 1.83298700  |
| C | -5.42239300 | 4.76774600  | -0.73101700 |
| H | -5.04143300 | 2.65183500  | -0.59331800 |
| C | -4.76515000 | 6.08971700  | 1.18714000  |
| H | -3.88264500 | 4.99688600  | 2.82582300  |
| C | -5.31525400 | 6.00889200  | -0.09657100 |
| H | -5.84141700 | 4.69725000  | -1.73074900 |
| H | -4.68120700 | 7.05239800  | 1.68388900  |
| H | -5.65755400 | 6.90981200  | -0.59835500 |
| P | 1.61311600  | -1.26888200 | 1.25404900  |
| P | 1.17002000  | 1.81790400  | -1.24825700 |
| C | -1.79776500 | 5.25574200  | -2.30089800 |
| C | -0.89071100 | 4.82184000  | -3.26820600 |
| C | 0.05182900  | 3.83507200  | -2.96287000 |
| C | 0.09012700  | 3.25222000  | -1.68607000 |
| C | -0.85160100 | 3.68251700  | -0.72988300 |
| C | -1.77047100 | 4.68741000  | -1.02483200 |
| H | 0.75212400  | 3.51221700  | -3.72585700 |
| H | -0.87237600 | 3.22125100  | 0.25474100  |
| C | 3.81973700  | -4.59876500 | 3.66346900  |
| C | 4.49184400  | -3.41998100 | 3.32973700  |
| C | 3.84068400  | -2.42371400 | 2.60361600  |
| C | 2.50161900  | -2.58205100 | 2.21031600  |
| C | 1.84386500  | -3.77725200 | 2.53636800  |
| C | 2.49588800  | -4.77754800 | 3.26054800  |
| H | 4.37597000  | -1.51997100 | 2.33543600  |
| H | 0.82287800  | -3.93749600 | 2.19931900  |
| C | 0.79596900  | 2.19576100  | 4.23285000  |
| C | 1.73508400  | 1.22128800  | 4.57348300  |
| C | 2.00779600  | 0.17101100  | 3.69639000  |
| C | 1.34035700  | 0.08556200  | 2.46542700  |
| C | 0.37252600  | 1.04941700  | 2.14872700  |
| C | 0.11439700  | 2.10692300  | 3.01793200  |
| H | 2.74638700  | -0.57151000 | 3.97370000  |
| H | -0.18189200 | 0.96719500  | 1.21994300  |
| C | 3.94466900  | 1.07843800  | -4.89065200 |
| C | 3.99165200  | 2.32248500  | -4.25113800 |
| C | 3.15911200  | 2.58264900  | -3.16425200 |

|   |             |             |             |
|---|-------------|-------------|-------------|
| C | 2.26227500  | 1.60105300  | -2.71007500 |
| C | 2.22508000  | 0.35885000  | -3.35652100 |
| C | 3.06193600  | 0.09651500  | -4.44161400 |
| H | 3.21481500  | 3.54082800  | -2.65391100 |
| H | 1.57934500  | -0.42642200 | -2.99345500 |
| H | 6.34985100  | 1.00787500  | 4.00905500  |
| C | 3.27010600  | 1.68264700  | 0.61694400  |
| C | 2.30316300  | 2.51852000  | 0.05338200  |
| C | 2.08364500  | 3.80099600  | 0.62804900  |
| H | 1.36600700  | 4.47256000  | 0.17160200  |
| C | 2.74355100  | 4.20181300  | 1.76417400  |
| H | 2.54339100  | 5.17973400  | 2.19653300  |
| C | 3.68411200  | 3.35193000  | 2.39537400  |
| C | 3.98687300  | 2.09288500  | 1.78434600  |
| H | 5.26726600  | 0.35223600  | 1.89701800  |
| C | 4.98386700  | 1.27668500  | 2.38762000  |
| C | 5.59673800  | 1.65155100  | 3.56231900  |
| H | 5.74664300  | 3.16082500  | 5.11723700  |
| C | 5.25980300  | 2.87655700  | 4.18828400  |
| H | 4.08252800  | 4.66494100  | 4.06631200  |
| C | 4.33309900  | 3.71195000  | 3.60588800  |
| H | 7.92677600  | 0.56540200  | -3.29529700 |
| C | 4.36702300  | -1.85014900 | -1.63117300 |
| H | 4.58835200  | -2.69896100 | -2.27133800 |
| C | 3.31434000  | -1.91641600 | -0.75905400 |
| H | 2.71989600  | -2.81973400 | -0.71621900 |
| C | 2.95462200  | -0.80456000 | 0.06027200  |
| C | 3.64722200  | 0.39998100  | -0.06405600 |
| C | 4.79487300  | 0.46109400  | -0.93674600 |
| C | 5.16097100  | -0.68066500 | -1.71803800 |
| H | 6.54659800  | -1.49044600 | -3.16297900 |
| C | 6.29473000  | -0.61503700 | -2.56954600 |
| C | 7.05775400  | 0.52758000  | -2.64391400 |
| H | 7.30020300  | 2.56505400  | -1.94027600 |
| C | 6.70233900  | 1.65990500  | -1.87497100 |
| H | 5.33169300  | 2.51556000  | -0.48660100 |
| C | 5.59690600  | 1.63184400  | -1.05399600 |
| H | -2.53088600 | 6.02238700  | -2.53653900 |
| H | 4.33005900  | -5.37789700 | 4.22307600  |
| H | 0.59417800  | 3.01950900  | 4.91239200  |
| H | 4.60824700  | 0.87538200  | -5.72721400 |
| H | -0.90870200 | 5.25302300  | -4.26609200 |
| H | -2.47837100 | 5.01135000  | -0.27030200 |
| H | 5.52768500  | -3.27928400 | 3.62651600  |

|    |             |             |             |
|----|-------------|-------------|-------------|
| H  | 1.97120300  | -5.69906200 | 3.49766900  |
| H  | 3.02440400  | -0.88516400 | -4.90406500 |
| H  | 4.69306100  | 3.08137400  | -4.58812400 |
| H  | -0.63829800 | 2.84428100  | 2.75335100  |
| H  | 2.27308900  | 1.28569100  | 5.51486100  |
| Pd | -0.46460100 | -2.34166200 | 0.50442300  |

**INT37**

|    |             |             |             |
|----|-------------|-------------|-------------|
| C  | -2.41567300 | -3.14789600 | 2.63843000  |
| C  | -3.00802900 | -2.59732500 | 1.47826900  |
| C  | -3.19061900 | -1.18880400 | 1.31399000  |
| C  | -2.72104100 | -0.35786900 | 2.38409000  |
| C  | -2.13833700 | -0.92941400 | 3.52527300  |
| C  | -1.98359700 | -2.31306000 | 3.65401500  |
| Si | -4.35804200 | -0.58167400 | -0.09665300 |
| C  | -4.09422300 | -1.91820100 | -1.39601400 |
| C  | -2.81949600 | -2.50041500 | -1.44851200 |
| C  | -5.03720600 | -2.35006600 | -2.34907400 |
| C  | -4.73032000 | -3.35555400 | -3.26618600 |
| C  | -3.46928900 | -3.95225100 | -3.25147800 |
| C  | -2.49846400 | -3.51996900 | -2.34093500 |
| H  | -2.31176300 | -4.22436800 | 2.72491500  |
| H  | -1.77548000 | -0.27214200 | 4.30800600  |
| H  | -1.51513800 | -2.71953700 | 4.54478200  |
| H  | -3.50247600 | -3.28026400 | 0.79482000  |
| H  | -6.01993500 | -1.89136200 | -2.38477300 |
| H  | -5.47530500 | -3.67215700 | -3.99157800 |
| H  | -3.22082900 | -4.73465000 | -3.96412000 |
| H  | -1.49732600 | -3.93366100 | -2.38847900 |
| O  | 0.18529700  | -2.81712300 | -3.47276900 |
| S  | 0.28392500  | -1.38019100 | -3.17318300 |
| O  | 1.52866000  | -0.69764300 | -3.53923600 |
| O  | -0.18133800 | -1.01602000 | -1.76902600 |
| C  | -0.99753800 | -0.52487600 | -4.22594700 |
| F  | -0.81467800 | -0.85331500 | -5.51274100 |
| F  | -0.86764900 | 0.80302100  | -4.09797300 |
| F  | -2.24210900 | -0.86701800 | -3.87084700 |
| C  | -3.83145400 | 1.05319000  | -0.87444800 |
| C  | -4.77602400 | 1.93984100  | -1.42607600 |
| C  | -2.46978400 | 1.34770300  | -1.07623400 |
| C  | -4.37972500 | 3.07391400  | -2.14124300 |
| H  | -5.83842100 | 1.75506900  | -1.30464600 |
| C  | -2.06831800 | 2.47614300  | -1.78980800 |
| H  | -1.70047200 | 0.68453800  | -0.69296700 |

|   |             |             |             |
|---|-------------|-------------|-------------|
| C | -3.02272200 | 3.34607100  | -2.32044900 |
| H | -5.13259000 | 3.74058900  | -2.55508500 |
| H | -1.01314700 | 2.67150700  | -1.93666300 |
| H | -2.70370100 | 4.22727600  | -2.87012100 |
| C | -6.12360300 | -0.53830700 | 0.69741400  |
| C | -6.25770500 | 0.71744600  | 1.58864400  |
| C | -7.26672800 | -0.54378600 | -0.34355900 |
| C | -6.30523200 | -1.79036800 | 1.58668800  |
| H | -5.49700300 | 0.74564800  | 2.37514200  |
| H | -6.16724200 | 1.64631700  | 1.01641500  |
| H | -7.24221900 | 0.72094000  | 2.07874500  |
| H | -7.33189700 | -1.50410600 | -0.86396500 |
| H | -8.22817000 | -0.39029100 | 0.16747200  |
| H | -7.17382800 | 0.24174100  | -1.10031100 |
| H | -7.32401500 | -1.80894400 | 1.99931600  |
| H | -6.16284200 | -2.71954800 | 1.02040100  |
| H | -5.60905500 | -1.80049700 | 2.43234200  |
| C | -2.83419800 | 1.05717100  | 2.33426700  |
| C | -2.90571200 | 2.26984700  | 2.34056500  |
| C | -3.00789300 | 3.68624900  | 2.29962300  |
| C | -3.61824700 | 4.31587200  | 1.19689700  |
| C | -2.49116600 | 4.47511200  | 3.34766400  |
| C | -3.71045900 | 5.70407000  | 1.15165000  |
| H | -3.99540100 | 3.70929700  | 0.38310100  |
| C | -2.58503500 | 5.86389200  | 3.28926500  |
| H | -2.02045200 | 3.98724800  | 4.19627000  |
| C | -3.19598500 | 6.48236300  | 2.19316200  |
| H | -4.17495800 | 6.17939200  | 0.29228100  |
| H | -2.18095800 | 6.46572400  | 4.09860700  |
| H | -3.26561100 | 7.56579000  | 2.15043800  |
| P | 0.84116400  | -1.90438800 | 1.18152300  |
| P | 2.12711100  | 1.83926700  | -0.97391400 |
| C | -0.27766000 | 5.83513100  | -0.83148500 |
| C | 0.53294100  | 5.53758500  | -1.92844600 |
| C | 1.31663600  | 4.38128100  | -1.93531800 |
| C | 1.29134700  | 3.48643500  | -0.85099200 |
| C | 0.44675200  | 3.78903000  | 0.23255300  |
| C | -0.31108200 | 4.95795000  | 0.25416700  |
| H | 1.95171100  | 4.17322000  | -2.79092800 |
| H | 0.38322300  | 3.10821500  | 1.07466100  |
| C | 1.69872500  | -6.24913300 | 2.64723600  |
| C | 2.59289500  | -5.22568400 | 2.97223600  |
| C | 2.34359500  | -3.91734000 | 2.55920500  |
| C | 1.18136600  | -3.60241200 | 1.83475900  |

|   |             |             |             |
|---|-------------|-------------|-------------|
| C | 0.30263400  | -4.64309800 | 1.49883100  |
| C | 0.55726900  | -5.95638300 | 1.90041200  |
| H | 3.05966600  | -3.13994400 | 2.79762600  |
| H | -0.57979400 | -4.42979200 | 0.90310200  |
| C | 0.78285000  | 1.10345300  | 4.71312800  |
| C | 1.20490000  | -0.20377700 | 4.95884500  |
| C | 1.26980600  | -1.13044500 | 3.91671400  |
| C | 0.91591900  | -0.75726700 | 2.61201700  |
| C | 0.46488900  | 0.55196700  | 2.38147800  |
| C | 0.41089800  | 1.47866200  | 3.42030600  |
| H | 1.58791400  | -2.14206200 | 4.13334900  |
| H | 0.13398800  | 0.83917200  | 1.38778200  |
| C | 5.75944200  | 2.82513500  | -3.71827800 |
| C | 5.63181900  | 3.48800900  | -2.49280500 |
| C | 4.54789900  | 3.21171100  | -1.66177000 |
| C | 3.57980100  | 2.26735500  | -2.04293400 |
| C | 3.71146500  | 1.60944000  | -3.27312800 |
| C | 4.79935100  | 1.89040200  | -4.10499000 |
| H | 4.45679900  | 3.72562100  | -0.70865300 |
| H | 2.97958000  | 0.86338700  | -3.56240000 |
| H | 5.54116700  | -2.21644900 | 4.23319300  |
| C | 3.40902700  | 0.39297400  | 1.05560200  |
| C | 2.96119300  | 1.66225000  | 0.68506500  |
| C | 3.12683900  | 2.74477400  | 1.59369500  |
| H | 2.79647000  | 3.73562700  | 1.30216300  |
| C | 3.65857000  | 2.55693100  | 2.84629600  |
| H | 3.74469500  | 3.39287600  | 3.53703300  |
| C | 4.11408500  | 1.27902800  | 3.25542700  |
| C | 4.03900800  | 0.19396600  | 2.32450600  |
| H | 4.60806300  | -1.86262000 | 1.97714700  |
| C | 4.59397800  | -1.05883200 | 2.70510800  |
| C | 5.12145500  | -1.25075800 | 3.96339100  |
| H | 5.54668500  | -0.35597400 | 5.89620300  |
| C | 5.13540500  | -0.19207300 | 4.90382400  |
| H | 4.68623800  | 1.87548600  | 5.25348300  |
| C | 4.65418900  | 1.04817700  | 4.54823100  |
| H | 7.28367900  | -1.14140300 | -3.50982900 |
| C | 3.29630500  | -2.79194300 | -1.87997800 |
| H | 3.23149900  | -3.53473500 | -2.66943000 |
| C | 2.31683000  | -2.71984400 | -0.92860700 |
| H | 1.49096800  | -3.42229000 | -0.97757500 |
| C | 2.32155300  | -1.71074900 | 0.08045600  |
| C | 3.33709700  | -0.75896000 | 0.09517100  |
| C | 4.41830900  | -0.87086300 | -0.85247600 |

|    |             |             |             |
|----|-------------|-------------|-------------|
| C  | 4.38291600  | -1.88362300 | -1.86198700 |
| H  | 5.37241400  | -2.71894900 | -3.59074500 |
| C  | 5.42894800  | -1.95632800 | -2.81804900 |
| C  | 6.49014800  | -1.08134400 | -2.76986800 |
| H  | 7.38111900  | 0.59673400  | -1.72263100 |
| C  | 6.54739200  | -0.09817500 | -1.75477700 |
| H  | 5.58681300  | 0.78032800  | -0.06798900 |
| C  | 5.53913600  | 0.00579500  | -0.82357600 |
| H  | -0.88251700 | 6.73793300  | -0.82012800 |
| H  | 1.89868800  | -7.26952700 | 2.96269600  |
| H  | 0.73981100  | 1.82538100  | 5.52421900  |
| H  | 6.60729600  | 3.03735000  | -4.36509300 |
| H  | 0.56725900  | 6.21127900  | -2.78119400 |
| H  | -0.93337000 | 5.17789300  | 1.11321200  |
| H  | 3.49377500  | -5.44757900 | 3.53815200  |
| H  | -0.13364100 | -6.74791600 | 1.62262100  |
| H  | 4.89832300  | 1.36503300  | -5.05106100 |
| H  | 6.37745800  | 4.21795100  | -2.18667500 |
| H  | 0.05872500  | 2.48636100  | 3.22365500  |
| H  | 1.49314800  | -0.50598400 | 5.96170700  |
| Pd | -1.31524100 | -2.00029500 | -0.19066600 |

**TS30**

|   |            |             |             |
|---|------------|-------------|-------------|
| C | 2.12817200 | 0.79741600  | -0.60612700 |
| C | 2.58296900 | -0.53588600 | -1.00165600 |
| C | 4.25814000 | 2.22121600  | -0.65451600 |
| C | 3.71157500 | -1.18681700 | -0.41337700 |
| C | 5.34864400 | 1.35917200  | -0.40175000 |
| C | 1.81334200 | -1.23652500 | -1.95039900 |
| H | 1.00101400 | -0.70873700 | -2.43525800 |
| C | 2.05145300 | -2.56803300 | -2.26335500 |
| H | 1.42218000 | -3.07326300 | -2.99026100 |
| C | 3.89887800 | -2.54926400 | -0.72029500 |
| C | 3.07988000 | -3.24604800 | -1.60792100 |
| H | 4.73599400 | -3.07695000 | -0.27352700 |
| H | 3.26025400 | -4.29952000 | -1.80280400 |
| C | 6.63273400 | 1.77598600  | -0.80135500 |
| C | 6.84966600 | 2.98881500  | -1.45126900 |
| C | 5.76380500 | 3.81874900  | -1.73189800 |
| H | 5.90717400 | 4.75737900  | -2.25983200 |
| H | 7.85499400 | 3.27845100  | -1.74406300 |
| H | 7.48245400 | 1.12921700  | -0.60650900 |
| C | 2.83944800 | 1.92763700  | -0.31452100 |
| C | 1.99323200 | 3.04644100  | 0.15630800  |

|    |             |             |             |
|----|-------------|-------------|-------------|
| C  | 2.46373400  | 4.15604200  | 0.86580800  |
| C  | -0.23822600 | 4.00328300  | 0.15469900  |
| H  | 3.51488400  | 4.21202200  | 1.13070800  |
| H  | -1.28091900 | 3.99267100  | -0.12538600 |
| C  | 0.24994100  | 5.12244600  | 0.84301900  |
| C  | 1.59059000  | 5.18787400  | 1.21626000  |
| H  | 1.96542700  | 6.04908100  | 1.76166600  |
| H  | -0.42673400 | 5.94008500  | 1.07451300  |
| Si | 5.16909900  | -0.31020400 | 0.45493300  |
| C  | 5.02358400  | -0.03708200 | 2.35008800  |
| C  | 6.17980200  | 0.85676200  | 2.85193900  |
| C  | 3.69753800  | 0.69226800  | 2.65589700  |
| C  | 5.04705000  | -1.39194700 | 3.08770300  |
| H  | 7.16576900  | 0.41187700  | 2.68469300  |
| H  | 6.17379100  | 1.83610800  | 2.35992100  |
| H  | 6.07600500  | 1.02657900  | 3.93311600  |
| H  | 2.83445700  | 0.16782000  | 2.24050500  |
| H  | 3.55667700  | 0.77523700  | 3.74390400  |
| H  | 3.69364900  | 1.70978300  | 2.25033700  |
| H  | 4.82163300  | -1.24812600 | 4.15482200  |
| H  | 4.30672200  | -2.08629900 | 2.68279400  |
| H  | 6.02266600  | -1.88182300 | 3.02779500  |
| C  | 6.71267700  | -1.29842000 | -0.04039600 |
| C  | 6.88734900  | -1.58669800 | -1.41139200 |
| C  | 7.73818900  | -1.70022600 | 0.83280900  |
| C  | 8.01937300  | -2.24918900 | -1.88282500 |
| H  | 6.12275400  | -1.28890200 | -2.12499600 |
| C  | 8.87617000  | -2.36676900 | 0.36847900  |
| H  | 7.66745700  | -1.49373400 | 1.89450100  |
| C  | 9.01947800  | -2.64474500 | -0.99030400 |
| H  | 8.12285500  | -2.45592600 | -2.94478600 |
| H  | 9.64945500  | -2.66554200 | 1.07118900  |
| H  | 9.90365000  | -3.16180900 | -1.35310800 |
| C  | 4.48727800  | 3.44071400  | -1.33117800 |
| H  | 3.64975300  | 4.09214900  | -1.55827800 |
| C  | 0.62028200  | 2.95306800  | -0.16607600 |
| H  | 0.98431100  | 1.77187100  | -1.12979000 |
| Pd | -0.15332500 | 0.92713700  | -0.22175800 |
| P  | -0.85761600 | -1.33796100 | 0.31390300  |
| P  | -2.48763200 | 1.53909700  | -0.56188200 |
| C  | -2.56594900 | 4.83764000  | -3.83181000 |
| C  | -3.46553400 | 4.91463900  | -2.76758100 |
| C  | -3.46519100 | 3.93510800  | -1.77201800 |
| C  | -2.55506700 | 2.87006300  | -1.83099100 |



|   |             |             |             |
|---|-------------|-------------|-------------|
| C | -1.64586900 | 2.80540000  | -2.90069800 |
| C | -1.65675800 | 3.77824400  | -3.89845900 |
| H | -4.15997800 | 4.01855300  | -0.94378100 |
| H | -0.92312400 | 1.99539200  | -2.94940200 |
| C | 2.14788600  | -3.63452100 | 2.98941300  |
| C | 1.79085800  | -2.31214200 | 3.26589600  |
| C | 0.95123900  | -1.62164200 | 2.39677300  |
| C | 0.40264300  | -2.26243600 | 1.27251400  |
| C | 0.80566500  | -3.57068700 | 0.97543400  |
| C | 1.67967600  | -4.24758300 | 1.82831700  |
| H | 0.70858800  | -0.58189500 | 2.60023800  |
| H | 0.45637200  | -4.06353500 | 0.07737500  |
| C | -2.20219300 | -4.11480900 | -3.14545400 |
| C | -1.76698000 | -2.81628100 | -3.42054100 |
| C | -1.36110800 | -1.98128800 | -2.38184000 |
| C | -1.37996700 | -2.43454800 | -1.05620700 |
| C | -1.85023900 | -3.72965400 | -0.78438300 |
| C | -2.24874600 | -4.56705100 | -1.82564700 |
| H | -1.06318600 | -0.96158400 | -2.59790500 |
| H | -1.92256500 | -4.07857600 | 0.24127300  |
| C | -4.59782300 | 3.02961300  | 3.27341500  |
| C | -5.34746900 | 2.82555900  | 2.11265800  |
| C | -4.72420800 | 2.38365900  | 0.94707700  |
| C | -3.33864300 | 2.15654600  | 0.93047500  |
| C | -2.59137500 | 2.36285500  | 2.10022500  |
| C | -3.22079200 | 2.79718700  | 3.26623000  |
| H | -5.31954800 | 2.18097000  | 0.06162300  |
| H | -1.52179500 | 2.17599400  | 2.09932500  |
| H | -6.03077000 | -5.02558400 | -0.44781500 |
| C | -3.92684700 | -0.89512400 | -0.51438300 |
| C | -3.56087800 | 0.21668400  | -1.27326600 |
| C | -3.91549200 | 0.28046200  | -2.65038200 |
| H | -3.64443300 | 1.14837400  | -3.23825000 |
| C | -4.60768500 | -0.74298100 | -3.24942900 |
| H | -4.87378400 | -0.67532900 | -4.30121700 |
| C | -4.98913800 | -1.89347000 | -2.51649400 |
| C | -4.65571700 | -1.96895900 | -1.12586400 |
| H | -4.80416700 | -3.20615600 | 0.65053800  |
| C | -5.05169100 | -3.12872900 | -0.40160700 |
| C | -5.73705900 | -4.15012200 | -1.01977400 |
| H | -6.59955100 | -4.88665600 | -2.87058600 |
| C | -6.05936200 | -4.07264900 | -2.39600300 |
| H | -5.93421300 | -2.89546300 | -4.18402000 |
| C | -5.69064700 | -2.96649400 | -3.12709600 |

|   |             |             |             |
|---|-------------|-------------|-------------|
| H | -7.64117200 | -0.13576200 | 4.39643200  |
| C | -3.17990000 | -1.09935500 | 3.73249500  |
| H | -2.99927200 | -1.16010700 | 4.80272600  |
| C | -2.15126500 | -1.32638800 | 2.85266200  |
| H | -1.18171800 | -1.58587700 | 3.25295200  |
| C | -2.34469900 | -1.25010300 | 1.44450700  |
| C | -3.62383600 | -0.97793700 | 0.95061300  |
| C | -4.71961600 | -0.77212100 | 1.85958200  |
| C | -4.48456800 | -0.80569600 | 3.27058200  |
| H | -5.35510200 | -0.58950300 | 5.23822100  |
| C | -5.55637600 | -0.56404400 | 4.17039600  |
| C | -6.82533300 | -0.31315300 | 3.70180100  |
| H | -8.07257700 | -0.09719600 | 1.94077500  |
| C | -7.06887300 | -0.29183800 | 2.30785800  |
| H | -6.25367300 | -0.47635700 | 0.34951200  |
| C | -6.04631300 | -0.50973300 | 1.41202300  |
| H | -2.56792100 | 5.60220900  | -4.60313800 |
| H | 2.81196600  | -4.16987500 | 3.66165000  |
| H | -2.52306200 | -4.76449400 | -3.95412200 |
| H | -5.08878300 | 3.35985200  | 4.18407200  |
| H | -4.16902300 | 5.73994400  | -2.70668200 |
| H | -0.94922600 | 3.71570600  | -4.72016900 |
| H | 2.19159600  | -1.80801100 | 4.13919600  |
| H | 1.98657000  | -5.26022300 | 1.58329400  |
| H | -2.63662600 | 2.94547300  | 4.16969100  |
| H | -6.42131000 | 2.98383100  | 2.12152100  |
| H | -2.61671100 | -5.56373500 | -1.60260700 |
| H | -1.75887300 | -2.44669200 | -4.44161700 |

### INT38

|   |            |             |             |
|---|------------|-------------|-------------|
| C | 2.23820500 | 0.39002700  | -1.06451100 |
| C | 2.82379600 | -0.95195500 | -1.18605800 |
| C | 4.20348000 | 1.89795600  | -1.29135300 |
| C | 3.97025100 | -1.38873000 | -0.46312300 |
| C | 5.31945400 | 1.27472300  | -0.69157200 |
| C | 2.10734700 | -1.88068900 | -1.96662500 |
| H | 1.24549600 | -1.53897100 | -2.52834900 |
| C | 2.47357700 | -3.21897400 | -2.03815700 |
| H | 1.90012900 | -3.90372500 | -2.65734300 |
| C | 4.29464700 | -2.75669400 | -0.52886900 |
| C | 3.56522300 | -3.66746100 | -1.29414400 |
| H | 5.15753900 | -3.11978500 | 0.02116300  |
| H | 3.85390900 | -4.71489700 | -1.31359600 |
| C | 6.60192000 | 1.68431100  | -1.10801900 |

|    |             |             |             |
|----|-------------|-------------|-------------|
| C  | 6.78736300  | 2.64125200  | -2.10373200 |
| C  | 5.67609700  | 3.20103900  | -2.73525400 |
| H  | 5.80127200  | 3.92209600  | -3.53823100 |
| H  | 7.79176900  | 2.93293000  | -2.39755500 |
| H  | 7.47627300  | 1.22709400  | -0.65615300 |
| C  | 2.78294200  | 1.63126000  | -0.91185900 |
| C  | 1.98956000  | 2.76746100  | -0.35848000 |
| C  | 2.64001000  | 3.99844400  | -0.11688100 |
| C  | 0.09437600  | 3.66090400  | 0.88708500  |
| H  | 3.66614500  | 4.12357800  | -0.43861600 |
| H  | -0.90165400 | 3.56038200  | 1.30293500  |
| C  | 0.75921500  | 4.87415200  | 1.09758100  |
| C  | 2.03610200  | 5.04368900  | 0.57784800  |
| H  | 2.58025100  | 5.97110900  | 0.73071000  |
| H  | 0.27188700  | 5.66818800  | 1.65691200  |
| Si | 5.15501800  | -0.21799800 | 0.46064100  |
| C  | 4.55772800  | 0.19344200  | 2.24427200  |
| C  | 5.39361100  | 1.34604600  | 2.84243800  |
| C  | 3.07764700  | 0.63344300  | 2.25284600  |
| C  | 4.68248500  | -1.07923200 | 3.11155800  |
| H  | 6.46130100  | 1.11410000  | 2.90679700  |
| H  | 5.29120800  | 2.26087700  | 2.24667400  |
| H  | 5.04660300  | 1.57220200  | 3.86081900  |
| H  | 2.42996400  | -0.09410300 | 1.75401500  |
| H  | 2.73000800  | 0.73208100  | 3.29238200  |
| H  | 2.93531400  | 1.60429300  | 1.77247200  |
| H  | 4.29543700  | -0.88285500 | 4.12235100  |
| H  | 4.09816800  | -1.90442100 | 2.69079400  |
| H  | 5.71390700  | -1.42464400 | 3.21848200  |
| C  | 6.86384600  | -1.04617800 | 0.43676800  |
| C  | 7.30441400  | -1.61667300 | -0.77701600 |
| C  | 7.77460200  | -1.04596100 | 1.50835100  |
| C  | 8.57649100  | -2.17251000 | -0.90786500 |
| H  | 6.64149400  | -1.62669000 | -1.63863800 |
| C  | 9.05177800  | -1.60040400 | 1.38561200  |
| H  | 7.50161300  | -0.60509100 | 2.46047600  |
| C  | 9.45579400  | -2.16858800 | 0.17782600  |
| H  | 8.88248100  | -2.60576800 | -1.85647400 |
| H  | 9.72938500  | -1.58488400 | 2.23511200  |
| H  | 10.44818100 | -2.60033800 | 0.08045700  |
| C  | 4.39775300  | 2.83515300  | -2.32475700 |
| H  | 3.53021300  | 3.28573900  | -2.79937400 |
| C  | 0.66763400  | 2.62045600  | 0.15477800  |
| H  | 1.13713200  | 0.37380600  | -1.21786500 |

|    |             |             |             |
|----|-------------|-------------|-------------|
| Pd | -0.24077100 | 0.78113300  | 0.06913700  |
| P  | -1.10901500 | -1.49202200 | 0.29231100  |
| P  | -2.35905700 | 1.69829000  | -0.21178700 |
| C  | -2.09612000 | 5.70861800  | -2.52845100 |
| C  | -2.98485400 | 5.59688700  | -1.45963300 |
| C  | -3.09286700 | 4.39616200  | -0.75361300 |
| C  | -2.30451400 | 3.29600700  | -1.11459700 |
| C  | -1.39672500 | 3.42180500  | -2.18090200 |
| C  | -1.30229600 | 4.61584000  | -2.88993900 |
| H  | -3.77391200 | 4.33738000  | 0.08713600  |
| H  | -0.74423000 | 2.59205700  | -2.43674800 |
| C  | 2.00454500  | -3.73410400 | 2.89096300  |
| C  | 1.46108500  | -2.51514000 | 3.30528800  |
| C  | 0.53543800  | -1.85692900 | 2.50013300  |
| C  | 0.10869000  | -2.43001000 | 1.28688300  |
| C  | 0.67463700  | -3.64162800 | 0.86904000  |
| C  | 1.62237300  | -4.28406900 | 1.66745400  |
| H  | 0.13961600  | -0.89511200 | 2.81782400  |
| H  | 0.39721600  | -4.07712800 | -0.08284700 |
| C  | -2.06798700 | -3.86095200 | -3.56000600 |
| C  | -1.58201900 | -2.55392800 | -3.63646800 |
| C  | -1.28003500 | -1.85417600 | -2.46939300 |
| C  | -1.45610500 | -2.45749400 | -1.21658000 |
| C  | -1.96136000 | -3.76490600 | -1.14534900 |
| C  | -2.25865900 | -4.46437300 | -2.31424900 |
| H  | -0.94022900 | -0.82457200 | -2.52745100 |
| H  | -2.13330400 | -4.22947200 | -0.17838100 |
| C  | -4.62273800 | 2.34136300  | 3.76722100  |
| C  | -5.28825800 | 2.52522100  | 2.55338500  |
| C  | -4.61285100 | 2.33322700  | 1.34963200  |
| C  | -3.25596200 | 1.96978900  | 1.35344000  |
| C  | -2.59371500 | 1.78464700  | 2.57614500  |
| C  | -3.27671600 | 1.96882900  | 3.77749400  |
| H  | -5.14897300 | 2.43342600  | 0.41070300  |
| H  | -1.54948500 | 1.48450400  | 2.58352400  |
| H  | -6.25775500 | -4.50986400 | -1.72204500 |
| C  | -3.93204500 | -0.61645000 | -0.75623000 |
| C  | -3.39091700 | 0.57388100  | -1.25210400 |
| C  | -3.52470200 | 0.88890100  | -2.63505400 |
| H  | -3.12073600 | 1.81721300  | -3.01830700 |
| C  | -4.18048900 | 0.04363100  | -3.49453800 |
| H  | -4.28075300 | 0.30888000  | -4.54388700 |
| C  | -4.74250100 | -1.17241700 | -3.03493900 |
| C  | -4.62013800 | -1.50858100 | -1.64799100 |

|   |             |             |             |
|---|-------------|-------------|-------------|
| H | -5.09064800 | -3.02098700 | -0.16358600 |
| C | -5.18290900 | -2.73961200 | -1.20556500 |
| C | -5.83544900 | -3.57634700 | -2.08244000 |
| H | -6.47663800 | -3.90487900 | -4.13001700 |
| C | -5.95766500 | -3.23509800 | -3.45058200 |
| H | -5.50287400 | -1.78552300 | -4.96418100 |
| C | -5.41831300 | -2.05751800 | -3.91527400 |
| H | -8.22201200 | -0.47742000 | 3.74301700  |
| C | -3.81027800 | -1.78164000 | 3.40234100  |
| H | -3.78875900 | -2.09211300 | 4.44389900  |
| C | -2.68933600 | -1.92333200 | 2.62112900  |
| H | -1.79737600 | -2.35691300 | 3.05510600  |
| C | -2.68881200 | -1.51542000 | 1.25955300  |
| C | -3.85628000 | -1.00354700 | 0.69146600  |
| C | -5.04585500 | -0.88260000 | 1.48491900  |
| C | -5.00850600 | -1.24802800 | 2.86907300  |
| H | -6.12370700 | -1.35991400 | 4.71888200  |
| C | -6.17086400 | -1.08340900 | 3.66875400  |
| C | -7.33646900 | -0.59412600 | 3.12516500  |
| H | -8.30975100 | 0.12752900  | 1.32604500  |
| C | -7.38490600 | -0.25012600 | 1.75274800  |
| H | -6.32439900 | -0.11131000 | -0.09153600 |
| C | -6.27118600 | -0.38748100 | 0.95501600  |
| H | -2.01201200 | 6.64535000  | -3.07156300 |
| H | 2.73768000  | -4.24045200 | 3.51191800  |
| H | -2.31169800 | -4.40397400 | -4.46827900 |
| H | -5.15598100 | 2.47823200  | 4.70318600  |
| H | -3.59449200 | 6.44621100  | -1.16536100 |
| H | -0.59575300 | 4.70020100  | -3.71033900 |
| H | 1.77930500  | -2.06416800 | 4.23992500  |
| H | 2.06301600  | -5.21604000 | 1.32664200  |
| H | -2.75939200 | 1.81383600  | 4.71957700  |
| H | -6.34067400 | 2.78993400  | 2.54210800  |
| H | -2.65369200 | -5.47400600 | -2.25270500 |
| H | -1.45303900 | -2.07382400 | -4.60191400 |

**TS31**

|   |             |             |             |
|---|-------------|-------------|-------------|
| C | -2.47424000 | 1.71093700  | 0.55360600  |
| C | -1.84508200 | 0.51674300  | 0.43767700  |
| C | -2.34630700 | -0.82677500 | 0.25540200  |
| C | -3.84406500 | 1.71785300  | 1.17430800  |
| C | -3.48624800 | -1.23083600 | -0.51492600 |
| C | -4.98272800 | 1.13432400  | 0.56423000  |
| C | -5.18904800 | 2.38965900  | 3.09954100  |

|    |             |             |             |
|----|-------------|-------------|-------------|
| H  | -5.25230100 | 2.84919600  | 4.08250100  |
| C  | -6.33053000 | 1.88610600  | 2.47728300  |
| H  | -7.30067400 | 1.96163100  | 2.96043800  |
| C  | -6.21499300 | 1.25380900  | 1.23916100  |
| H  | -7.10580900 | 0.82013300  | 0.79550900  |
| C  | -3.95883200 | 2.30089900  | 2.44963000  |
| H  | -3.06399200 | 2.68858500  | 2.93091900  |
| C  | -1.47079400 | -3.10987000 | 0.26527600  |
| H  | -0.70805400 | -3.83502400 | 0.54294200  |
| C  | -2.55487800 | -3.51528900 | -0.49219700 |
| H  | -2.65375400 | -4.55059900 | -0.80803000 |
| C  | -3.55471300 | -2.58246800 | -0.85199300 |
| H  | -4.41864600 | -2.94742800 | -1.40224200 |
| C  | -1.35663900 | -1.76320800 | 0.69960000  |
| H  | -1.33177700 | -1.63293500 | 2.21299100  |
| Si | -4.89964300 | -0.03931900 | -0.93375700 |
| C  | -4.62231500 | 0.71539600  | -2.68359100 |
| C  | -6.50370700 | -1.05610500 | -0.85726600 |
| C  | -7.63213600 | -0.79446300 | -1.65615300 |
| C  | -6.63282600 | -2.06635900 | 0.11742200  |
| C  | -8.82235600 | -1.51002100 | -1.50175200 |
| H  | -7.59728800 | -0.01953700 | -2.41411000 |
| C  | -7.81619900 | -2.78735900 | 0.27789500  |
| H  | -5.79088700 | -2.29921700 | 0.76231500  |
| C  | -8.91773400 | -2.51141900 | -0.53503000 |
| H  | -9.67374300 | -1.28336800 | -2.13792200 |
| H  | -7.87928700 | -3.56368200 | 1.03631600  |
| H  | -9.84183700 | -3.07006100 | -0.41439500 |
| Pd | 0.12518900  | -0.26448900 | 0.25079300  |
| P  | 1.74218300  | -1.81838800 | -0.63014700 |
| P  | 1.65755100  | 1.55118300  | 0.36169700  |
| C  | 0.18694300  | 4.86935100  | 3.27297100  |
| C  | 0.93462800  | 5.24231700  | 2.15626900  |
| C  | 1.39218500  | 4.28094300  | 1.25209900  |
| C  | 1.09994100  | 2.92671800  | 1.45484600  |
| C  | 0.31627400  | 2.56690700  | 2.56278800  |
| C  | -0.12627200 | 3.52274000  | 3.47330500  |
| H  | 1.94433800  | 4.60038300  | 0.37735300  |
| H  | 0.04569400  | 1.52789700  | 2.69049500  |
| C  | -0.76688700 | -4.01034600 | -3.86891400 |
| C  | -0.91106400 | -2.63700600 | -3.65028200 |
| C  | -0.13036900 | -2.00105500 | -2.68830600 |
| C  | 0.81025100  | -2.72528000 | -1.93460400 |
| C  | 0.95342700  | -4.09936500 | -2.16446400 |

|   |             |             |             |
|---|-------------|-------------|-------------|
| C | 0.16474500  | -4.73712700 | -3.12609100 |
| H | -0.27440900 | -0.94013100 | -2.50014000 |
| H | 1.66640500  | -4.67927900 | -1.58720900 |
| C | 3.53424400  | -5.03142700 | 2.18064600  |
| C | 2.41000300  | -4.29574100 | 2.56290300  |
| C | 1.87966200  | -3.33444100 | 1.70269800  |
| C | 2.46909200  | -3.10126700 | 0.45193100  |
| C | 3.59726400  | -3.84401500 | 0.07367900  |
| C | 4.12444700  | -4.80623800 | 0.93487400  |
| H | 1.01180700  | -2.75206100 | 1.99334400  |
| H | 4.07127400  | -3.65753200 | -0.88574300 |
| C | 3.41369200  | 3.41027800  | -3.50080100 |
| C | 3.94351900  | 3.77225700  | -2.26077600 |
| C | 3.42865800  | 3.21511200  | -1.09085600 |
| C | 2.36118600  | 2.30541100  | -1.14929200 |
| C | 1.84926400  | 1.93278900  | -2.39986200 |
| C | 2.37166300  | 2.48217500  | -3.56950900 |
| H | 3.87797300  | 3.46654700  | -0.13485500 |
| H | 1.05298500  | 1.19707700  | -2.45586000 |
| H | 7.54265600  | -3.02124600 | 1.14061600  |
| C | 4.00769900  | -0.06116400 | 0.63937900  |
| C | 3.11184000  | 0.81149100  | 1.26631700  |
| C | 3.20416100  | 1.00762100  | 2.67316800  |
| H | 2.54117600  | 1.71203500  | 3.15889600  |
| C | 4.12404000  | 0.32957800  | 3.43442700  |
| H | 4.17586100  | 0.50293800  | 4.50671800  |
| C | 5.02384000  | -0.58876900 | 2.84224500  |
| C | 4.98075500  | -0.77216400 | 1.42235400  |
| H | 5.91438800  | -1.81339100 | -0.23679200 |
| C | 5.92281400  | -1.66521800 | 0.83631800  |
| C | 6.83586600  | -2.34354100 | 1.61097400  |
| H | 7.59068100  | -2.70967100 | 3.61371900  |
| C | 6.86369300  | -2.16794300 | 3.01561000  |
| H | 5.99243900  | -1.15415100 | 4.69203500  |
| C | 5.97546000  | -1.30594900 | 3.61569200  |
| H | 7.84149900  | 2.31745900  | -3.63566200 |
| C | 4.25807600  | -0.58777100 | -3.64648800 |
| H | 4.33223500  | -0.72350900 | -4.72255100 |
| C | 3.28399600  | -1.24466100 | -2.93521400 |
| H | 2.59227000  | -1.89753500 | -3.45445700 |
| C | 3.16608000  | -1.07231100 | -1.52843400 |
| C | 4.05857800  | -0.24374900 | -0.85042100 |
| C | 5.09614400  | 0.43028300  | -1.57593300 |
| C | 5.17959000  | 0.27027800  | -2.99721100 |

|   |             |             |             |
|---|-------------|-------------|-------------|
| H | 6.22771000  | 0.84374400  | -4.79992900 |
| C | 6.18069700  | 0.97068600  | -3.72135100 |
| C | 7.07704800  | 1.78927800  | -3.07314600 |
| H | 7.72179300  | 2.58191200  | -1.15976700 |
| C | 7.00790200  | 1.93919600  | -1.66710200 |
| H | 5.99946500  | 1.40991100  | 0.13682900  |
| C | 6.04399000  | 1.27961700  | -0.93821700 |
| H | -0.16285400 | 5.62292900  | 3.97262500  |
| H | -1.38209000 | -4.51122200 | -4.61099200 |
| H | 3.95316900  | -5.77420800 | 2.85336100  |
| H | 3.82408500  | 3.83637400  | -4.41150900 |
| H | 1.15873200  | 6.28978000  | 1.97700400  |
| H | -0.72458100 | 3.21977600  | 4.32910700  |
| H | -1.64186700 | -2.06429100 | -4.21449100 |
| H | 0.27920400  | -5.80488200 | -3.29094700 |
| H | 1.97267900  | 2.17764200  | -4.53266200 |
| H | 4.77556500  | 4.46727000  | -2.20482600 |
| H | 5.00382100  | -5.37072800 | 0.63888700  |
| H | 1.95325500  | -4.46689500 | 3.53421500  |
| C | -1.91521200 | 3.00947200  | 0.09332700  |
| C | -1.03091500 | 3.02095300  | -1.00386300 |
| C | -2.33212400 | 4.25832700  | 0.59296900  |
| C | -0.55962000 | 4.20824700  | -1.55677800 |
| H | -0.74739900 | 2.07591500  | -1.44660200 |
| C | -1.85717700 | 5.44911600  | 0.04542300  |
| H | -3.03953700 | 4.31087400  | 1.41021900  |
| C | -0.96844100 | 5.43428100  | -1.03084900 |
| H | 0.12165100  | 4.16996600  | -2.40142300 |
| H | -2.19210400 | 6.39519400  | 0.46183800  |
| H | -0.61093600 | 6.36528100  | -1.46185200 |
| C | -5.55556400 | 1.91730700  | -2.94355700 |
| H | -5.39412200 | 2.71283500  | -2.20646800 |
| H | -5.35451800 | 2.34057100  | -3.93786100 |
| H | -6.61701400 | 1.65168800  | -2.91553500 |
| C | -4.85490500 | -0.39624300 | -3.73287500 |
| H | -4.66456000 | -0.00021800 | -4.74047600 |
| H | -4.16821500 | -1.23918900 | -3.57721700 |
| H | -5.87374700 | -0.79347700 | -3.72083000 |
| C | -3.16948100 | 1.20677100  | -2.83470200 |
| H | -2.97315500 | 2.07627800  | -2.20662200 |
| H | -2.43896100 | 0.42954800  | -2.57804300 |
| H | -2.98620100 | 1.50986300  | -3.87592200 |
| N | -1.68644100 | -1.59717400 | 3.40071900  |
| H | -1.46109200 | -2.51706700 | 3.78948900  |



|   |             |             |            |
|---|-------------|-------------|------------|
| C | -3.16726800 | -1.38852300 | 3.43738400 |
| H | -3.44801300 | -1.10798400 | 4.45930200 |
| H | -3.37884100 | -0.53568300 | 2.78608900 |
| C | -3.92712000 | -2.62830400 | 2.98700300 |
| H | -3.73444900 | -3.48001300 | 3.65122400 |
| H | -5.00057800 | -2.41926300 | 3.01624000 |
| H | -3.66164000 | -2.91252000 | 1.96649200 |
| C | 0.56634600  | -0.77481500 | 4.07694100 |
| H | 0.93657000  | -0.73148800 | 3.04991100 |
| H | 1.08343000  | -0.00000900 | 4.64948300 |
| H | 0.84265400  | -1.74595600 | 4.50518100 |
| C | -0.93746200 | -0.54619900 | 4.13838100 |
| H | -1.29430600 | -0.52349600 | 5.17546800 |
| H | -1.21955700 | 0.40043900  | 3.67078300 |

### INT39

|    |             |             |             |
|----|-------------|-------------|-------------|
| C  | -2.47016800 | 1.59548400  | 0.37916100  |
| C  | -1.84547800 | 0.40240300  | 0.16410200  |
| C  | -2.40482700 | -0.93178200 | -0.04749600 |
| C  | -3.76748400 | 1.59132900  | 1.13758100  |
| C  | -3.66387200 | -1.35950700 | -0.56786400 |
| C  | -4.96457900 | 0.98585400  | 0.68368100  |
| C  | -4.84529900 | 2.16345000  | 3.26092600  |
| H  | -4.78217000 | 2.60841400  | 4.25091500  |
| C  | -6.03860000 | 1.59941000  | 2.81014200  |
| H  | -6.92561900 | 1.60655800  | 3.43766600  |
| C  | -6.08303500 | 1.01612800  | 1.54394100  |
| H  | -7.01263900 | 0.56028900  | 1.22004100  |
| C  | -3.72751600 | 2.15533600  | 2.42937100  |
| H  | -2.79669100 | 2.59280800  | 2.77718100  |
| C  | -1.44486500 | -3.16313900 | -0.29303300 |
| H  | -0.60218600 | -3.84929900 | -0.26133700 |
| C  | -2.69233700 | -3.61869000 | -0.73012600 |
| H  | -2.83002400 | -4.66668400 | -0.98649200 |
| C  | -3.75794500 | -2.72023800 | -0.90434500 |
| H  | -4.68183200 | -3.10252300 | -1.32989100 |
| C  | -1.29319500 | -1.81094200 | 0.03590500  |
| H  | -1.92800100 | -1.75573500 | 2.02897600  |
| Si | -5.03527800 | -0.09880200 | -0.87870700 |
| C  | -4.72921700 | 0.78900600  | -2.57637200 |
| C  | -6.74901300 | -0.90828700 | -0.80952800 |
| C  | -7.87869100 | -0.19520100 | -1.26002800 |
| C  | -6.98552400 | -2.14271300 | -0.17650800 |
| C  | -9.17183600 | -0.69939100 | -1.11358800 |

|    |              |             |             |
|----|--------------|-------------|-------------|
| H  | -7.75631800  | 0.78170500  | -1.72025500 |
| C  | -8.27594000  | -2.65774500 | -0.02959300 |
| H  | -6.15370800  | -2.71650000 | 0.21786600  |
| C  | -9.37420900  | -1.93896000 | -0.50294100 |
| H  | -10.02028800 | -0.12418900 | -1.47433800 |
| H  | -8.42249700  | -3.61950800 | 0.45559500  |
| H  | -10.37918800 | -2.33646700 | -0.39118500 |
| Pd | 0.15100100   | -0.33485700 | -0.00203400 |
| P  | 1.91838400   | -1.79479600 | -0.73017800 |
| P  | 1.65955300   | 1.51336100  | 0.37865700  |
| C  | -0.02837600  | 4.76709500  | 3.25210700  |
| C  | 0.74985600   | 5.16718200  | 2.16659300  |
| C  | 1.26704200   | 4.22383500  | 1.27582500  |
| C  | 0.99934100   | 2.86057200  | 1.45290000  |
| C  | 0.16690900   | 2.47562000  | 2.51626300  |
| C  | -0.32231000  | 3.41243000  | 3.42365200  |
| H  | 1.85115100   | 4.56406500  | 0.43038700  |
| H  | -0.10064900  | 1.43236500  | 2.61471500  |
| C  | 0.12563000   | -4.15554200 | -4.30710000 |
| C  | -0.25499700  | -2.83470600 | -4.05364900 |
| C  | 0.29498300   | -2.14625900 | -2.97423200 |
| C  | 1.24201700   | -2.76539000 | -2.14083600 |
| C  | 1.62308000   | -4.08791300 | -2.40460800 |
| C  | 1.06260500   | -4.77947400 | -3.48135200 |
| H  | -0.03390100  | -1.13267000 | -2.75967800 |
| H  | 2.34641400   | -4.58635900 | -1.76710200 |
| C  | 3.39733100   | -4.93473000 | 2.33985600  |
| C  | 2.15702900   | -4.31058100 | 2.49519600  |
| C  | 1.72729200   | -3.36811900 | 1.56173200  |
| C  | 2.53343700   | -3.04257500 | 0.46058300  |
| C  | 3.77232300   | -3.68012400 | 0.30577400  |
| C  | 4.20135500   | -4.62057900 | 1.24259600  |
| H  | 0.76547700   | -2.87854100 | 1.67327400  |
| H  | 4.41003800   | -3.42504000 | -0.53496800 |
| C  | 3.69208700   | 3.56369300  | -3.24474000 |
| C  | 4.12051200   | 3.87611500  | -1.95294600 |
| C  | 3.52752900   | 3.25988400  | -0.85191800 |
| C  | 2.48411400   | 2.33805800  | -1.03139600 |
| C  | 2.07232200   | 2.01825200  | -2.33283100 |
| C  | 2.67299500   | 2.62724200  | -3.43391700 |
| H  | 3.89532100   | 3.47686100  | 0.14647500  |
| H  | 1.29163400   | 1.27827700  | -2.48160800 |
| H  | 7.66840300   | -2.82526700 | 1.56021900  |
| C  | 4.02595200   | -0.04366900 | 0.83226300  |

|   |             |             |             |
|---|-------------|-------------|-------------|
| C | 3.03090700  | 0.75749300  | 1.40077300  |
| C | 2.95242200  | 0.85698500  | 2.81933500  |
| H | 2.21742200  | 1.51133500  | 3.26941100  |
| C | 3.80154900  | 0.15621700  | 3.63945600  |
| H | 3.71782500  | 0.25324300  | 4.71945300  |
| C | 4.81235300  | -0.67571300 | 3.10082500  |
| C | 4.94736300  | -0.75427000 | 1.67780000  |
| H | 6.14295300  | -1.60828300 | 0.08014600  |
| C | 6.00896800  | -1.54590500 | 1.15327000  |
| C | 6.86522800  | -2.23029200 | 1.98585300  |
| H | 7.39169100  | -2.71455500 | 4.03613500  |
| C | 6.71021300  | -2.16706700 | 3.39148800  |
| H | 5.58195900  | -1.33278300 | 5.01260300  |
| C | 5.70401300  | -1.40222100 | 3.93453900  |
| H | 8.16422200  | 2.61428800  | -2.97145400 |
| C | 4.68343600  | -0.37886200 | -3.42807100 |
| H | 4.85678700  | -0.46563900 | -4.49775400 |
| C | 3.66902400  | -1.09026300 | -2.83597900 |
| H | 3.04816600  | -1.73624400 | -3.44483400 |
| C | 3.41778000  | -0.98464700 | -1.43946400 |
| C | 4.22230400  | -0.16224300 | -0.65103300 |
| C | 5.30091400  | 0.56837900  | -1.25121700 |
| C | 5.51783600  | 0.47268400  | -2.66367100 |
| H | 6.70711700  | 1.15065200  | -4.33791600 |
| C | 6.55915300  | 1.22942200  | -3.26388300 |
| C | 7.36821400  | 2.04229600  | -2.50347800 |
| H | 7.81169300  | 2.76892300  | -0.50827500 |
| C | 7.16694700  | 2.12973000  | -1.10483100 |
| H | 6.01438900  | 1.49774000  | 0.57535200  |
| C | 6.16089800  | 1.41442500  | -0.49526000 |
| H | -0.41711600 | 5.50431500  | 3.94855500  |
| H | -0.31042300 | -4.69722600 | -5.14168000 |
| H | 3.73761700  | -5.66085000 | 3.07250900  |
| H | 4.16287200  | 4.03651500  | -4.10166700 |
| H | 0.95680300  | 6.22089100  | 2.00421300  |
| H | -0.94343800 | 3.08917500  | 4.25550300  |
| H | -0.99122400 | -2.34555700 | -4.68519900 |
| H | 1.35870400  | -5.80718100 | -3.67224700 |
| H | 2.35159900  | 2.36347800  | -4.43735600 |
| H | 4.93409800  | 4.57898500  | -1.80288800 |
| H | 5.17038700  | -5.09567300 | 1.12297100  |
| H | 1.52944400  | -4.55590600 | 3.34834000  |
| C | -1.92725500 | 2.90170600  | -0.07298500 |
| C | -1.01929600 | 2.93354600  | -1.15268800 |

|   |             |             |             |
|---|-------------|-------------|-------------|
| C | -2.38457900 | 4.14487000  | 0.41003400  |
| C | -0.55242800 | 4.13054700  | -1.68714700 |
| H | -0.69754700 | 1.99610300  | -1.58750500 |
| C | -1.92107900 | 5.34517900  | -0.12638400 |
| H | -3.11586700 | 4.18502000  | 1.20714300  |
| C | -0.99754200 | 5.34940700  | -1.17284800 |
| H | 0.15479400  | 4.10664700  | -2.51091000 |
| H | -2.29028200 | 6.28394300  | 0.27775400  |
| H | -0.64427600 | 6.28716400  | -1.59247900 |
| C | -5.09940100 | 2.28391700  | -2.46955400 |
| H | -4.47625500 | 2.80346200  | -1.73282700 |
| H | -4.95167800 | 2.77984400  | -3.43925300 |
| H | -6.14780200 | 2.43451200  | -2.18331200 |
| C | -5.56784600 | 0.11330000  | -3.68656800 |
| H | -5.32361800 | 0.56935300  | -4.65621000 |
| H | -5.34941400 | -0.95940600 | -3.76567500 |
| H | -6.64505800 | 0.21747700  | -3.53811900 |
| C | -3.24790500 | 0.66884800  | -3.00229400 |
| H | -2.57483300 | 1.14394300  | -2.28971400 |
| H | -2.94029200 | -0.37825800 | -3.10956600 |
| H | -3.10651200 | 1.16257500  | -3.97420600 |
| N | -2.26153000 | -1.72871500 | 3.02389200  |
| H | -2.00970100 | -2.63550800 | 3.43134200  |
| C | -3.76635000 | -1.57301900 | 3.03535400  |
| H | -4.04349200 | -1.25410200 | 4.04318700  |
| H | -3.99336500 | -0.76351500 | 2.34159100  |
| C | -4.44725400 | -2.87415000 | 2.64474900  |
| H | -4.27735900 | -3.65997600 | 3.39083500  |
| H | -5.52476500 | -2.70022700 | 2.57596700  |
| H | -4.10209600 | -3.22261500 | 1.66752200  |
| C | -0.02609800 | -0.91770200 | 3.79011900  |
| H | 0.41199400  | -0.91452600 | 2.78817500  |
| H | 0.47423200  | -0.14143500 | 4.37498400  |
| H | 0.18942700  | -1.88121200 | 4.26790400  |
| C | -1.52059400 | -0.63419400 | 3.74436900  |
| H | -1.95389000 | -0.56684900 | 4.74619600  |
| H | -1.75904400 | 0.28141700  | 3.19894300  |

**TS32**

|   |             |             |             |
|---|-------------|-------------|-------------|
| P | -0.72831600 | -1.44570000 | -0.66492100 |
| P | -2.61185900 | 1.44137000  | -0.46419800 |
| C | -4.06659100 | 4.76825500  | -3.34645900 |
| C | -4.11843000 | 4.99076500  | -1.97001000 |
| C | -3.72547600 | 3.99024300  | -1.07680800 |

|   |             |             |             |
|---|-------------|-------------|-------------|
| C | -3.27345700 | 2.75561900  | -1.55811700 |
| C | -3.21433800 | 2.54159900  | -2.94742200 |
| C | -3.61656500 | 3.53724400  | -3.83552800 |
| H | -3.75514100 | 4.18366700  | -0.01023400 |
| H | -2.84079000 | 1.59634700  | -3.33415100 |
| C | 2.66424000  | -4.60468500 | -0.46383300 |
| C | 2.65274200  | -3.63050400 | -1.46306600 |
| C | 1.65630800  | -2.65422000 | -1.47731500 |
| C | 0.65926400  | -2.64047700 | -0.49426000 |
| C | 0.67502000  | -3.62689200 | 0.50814500  |
| C | 1.67505300  | -4.59883200 | 0.52248500  |
| H | 1.65653700  | -1.90685400 | -2.25804500 |
| H | -0.08505000 | -3.63695600 | 1.28238500  |
| C | -3.68467700 | -3.83008200 | -3.31744800 |
| C | -3.34651600 | -2.51486200 | -3.63990400 |
| C | -2.46404000 | -1.80336200 | -2.82682000 |
| C | -1.91655000 | -2.40020600 | -1.68334200 |
| C | -2.24497400 | -3.73004000 | -1.37686600 |
| C | -3.13045300 | -4.43661200 | -2.18705800 |
| H | -2.20469700 | -0.77659700 | -3.07020200 |
| H | -1.81598500 | -4.21191000 | -0.50452500 |
| C | -2.60828000 | 3.03358400  | 3.87584500  |
| C | -3.82234900 | 2.83048100  | 3.21337200  |
| C | -3.83233700 | 2.36330000  | 1.90075100  |
| C | -2.62233900 | 2.10229400  | 1.23713700  |
| C | -1.40824700 | 2.30638500  | 1.90645900  |
| C | -1.40400000 | 2.77256100  | 3.22071000  |
| H | -4.77838100 | 2.17902400  | 1.39926000  |
| H | -0.47272900 | 2.08026300  | 1.41074400  |
| H | -5.27202600 | -5.26150500 | 1.38293600  |
| C | -3.75797400 | -1.01548100 | 0.32764600  |
| C | -3.89515600 | 0.10850600  | -0.48959700 |
| C | -4.95653000 | 0.16538700  | -1.43377000 |
| H | -5.08843800 | 1.04858400  | -2.04633300 |
| C | -5.82343900 | -0.88966700 | -1.58629200 |
| H | -6.62530500 | -0.83199200 | -2.31789000 |
| C | -5.68774500 | -2.06445700 | -0.80737800 |
| C | -4.65542200 | -2.12013100 | 0.18353100  |
| H | -3.75936500 | -3.35322600 | 1.72627600  |
| C | -4.53467700 | -3.29987100 | 0.97009300  |
| C | -5.38088200 | -4.36791200 | 0.77501300  |
| H | -7.05300900 | -5.16451600 | -0.35700400 |
| C | -6.39370200 | -4.31340600 | -0.21360600 |
| H | -7.32059800 | -3.13100900 | -1.74336900 |

|   |             |             |             |
|---|-------------|-------------|-------------|
| C | -6.54367600 | -3.18362800 | -0.98507000 |
| H | -4.05607400 | -0.22160000 | 6.49193400  |
| C | -0.71368500 | -0.89173500 | 3.38298700  |
| H | 0.05707900  | -0.81239600 | 4.14387200  |
| C | -0.35975000 | -1.12426200 | 2.07853300  |
| H | 0.69123100  | -1.21120200 | 1.82442100  |
| C | -1.35401400 | -1.25644000 | 1.06356900  |
| C | -2.69542800 | -1.06267500 | 1.38186000  |
| C | -3.08267900 | -0.83780600 | 2.74819600  |
| C | -2.07381300 | -0.76057600 | 3.76090600  |
| H | -1.67257500 | -0.47481800 | 5.86595700  |
| C | -2.45143200 | -0.53296300 | 5.10978900  |
| C | -3.77613600 | -0.39058800 | 5.45620000  |
| H | -5.82099000 | -0.34838800 | 4.73649800  |
| C | -4.77703600 | -0.46335700 | 4.45922400  |
| H | -5.21971300 | -0.71954100 | 2.38876100  |
| C | -4.44050600 | -0.67407500 | 3.14016900  |
| H | -4.37035900 | 5.54937700  | -4.03718800 |
| H | 3.43967800  | -5.36537300 | -0.45131100 |
| H | -4.37604700 | -4.38375300 | -3.94597700 |
| H | -2.60461500 | 3.38581000  | 4.90317300  |
| H | -4.46208500 | 5.94672700  | -1.58542300 |
| H | -3.56911900 | 3.35868500  | -4.90592400 |
| H | 3.42812300  | -3.61531100 | -2.22280300 |
| H | 1.67781200  | -5.35372800 | 1.30358000  |
| H | -0.45845300 | 2.92049800  | 3.73537800  |
| H | -4.76101300 | 3.01775200  | 3.72590900  |
| H | -3.39438900 | -5.45827700 | -1.93178200 |
| H | -3.77248700 | -2.04019100 | -4.51911500 |
| C | 2.14266800  | 1.77685400  | 0.10288200  |
| C | 3.12482200  | 0.56545500  | 2.18015600  |
| C | 2.56233100  | 0.93428900  | -1.05615700 |
| C | 4.31339400  | -0.07950500 | 1.74991600  |
| C | 3.85140800  | 0.37676000  | -1.23035000 |
| C | 6.26154000  | -1.17222800 | -0.31244400 |
| C | 7.59684400  | -1.12361900 | -0.74946300 |
| C | 5.64915500  | -2.44150200 | -0.24856900 |
| C | 8.29035300  | -2.28378500 | -1.10649400 |
| H | 8.11835800  | -0.17533300 | -0.81620200 |
| C | 6.33461400  | -3.60247300 | -0.60342300 |
| H | 4.62044400  | -2.52680800 | 0.08967600  |
| C | 7.66115700  | -3.52673800 | -1.03574300 |
| H | 9.32266900  | -2.21351800 | -1.43831400 |
| H | 5.83612700  | -4.56630700 | -0.53825100 |

|    |             |             |             |
|----|-------------|-------------|-------------|
| H  | 8.19998100  | -4.42893500 | -1.31208100 |
| C  | 6.16039900  | 1.97435300  | 0.22459200  |
| C  | 7.29834200  | 1.82572900  | 1.25939200  |
| C  | 6.72962700  | 2.34526600  | -1.16350400 |
| C  | 5.24648700  | 3.13292400  | 0.68049500  |
| H  | 6.90337600  | 1.59498100  | 2.25636400  |
| H  | 8.01203300  | 1.03857800  | 0.99721300  |
| H  | 7.86008900  | 2.76702400  | 1.33708400  |
| H  | 5.92908600  | 2.47729900  | -1.90146300 |
| H  | 7.28002200  | 3.29422800  | -1.09991000 |
| H  | 7.42144100  | 1.59580000  | -1.55968900 |
| H  | 5.83842400  | 4.05559900  | 0.76053400  |
| H  | 4.43688200  | 3.32309400  | -0.03219500 |
| H  | 4.79840200  | 2.94123900  | 1.66176900  |
| C  | 3.23718600  | -0.24035800 | -3.53676900 |
| H  | 3.52756800  | -0.65740600 | -4.49706100 |
| C  | 1.61417600  | 0.78404400  | -2.09322600 |
| C  | 1.94014700  | 0.22958100  | -3.33245400 |
| H  | 1.19256200  | 0.16700000  | -4.11814200 |
| C  | 4.15026400  | -0.20152200 | -2.48069700 |
| H  | 5.13780100  | -0.62641100 | -2.63539000 |
| H  | 0.85645300  | 1.93540500  | -2.12489000 |
| C  | 2.62132700  | 0.29554300  | 3.47099700  |
| H  | 1.73017500  | 0.82226400  | 3.80356400  |
| C  | 4.91655700  | -0.99709100 | 2.63044400  |
| C  | 4.38634500  | -1.28312500 | 3.88855600  |
| H  | 4.88479600  | -1.99607800 | 4.53920500  |
| C  | 3.22894600  | -0.62821200 | 4.31324100  |
| H  | 2.81459200  | -0.82317500 | 5.29875500  |
| H  | 5.82973800  | -1.49973200 | 2.32692300  |
| Pd | -0.41902700 | 0.85040800  | -1.26978900 |
| C  | 1.33759800  | 2.98848400  | -0.26559900 |
| C  | 0.34691700  | 2.92234300  | -1.26754100 |
| C  | 1.57936200  | 4.23097700  | 0.34210800  |
| C  | -0.33214500 | 4.06239800  | -1.70233300 |
| C  | 0.86520300  | 5.36282500  | -0.05462300 |
| H  | 2.35233200  | 4.31793200  | 1.09934500  |
| C  | -0.07662900 | 5.28784400  | -1.08464300 |
| H  | -1.05991100 | 3.99748700  | -2.50226200 |
| H  | 1.07183700  | 6.31728600  | 0.42129000  |
| H  | -0.60847300 | 6.17748900  | -1.40891300 |
| Si | 5.18248800  | 0.32315700  | 0.11919200  |
| C  | 2.38154700  | 1.57766900  | 1.42394300  |
| H  | 1.87959200  | 2.28780700  | 2.07961300  |

**INT40**

|   |             |             |             |
|---|-------------|-------------|-------------|
| P | -0.68576500 | -1.50703200 | -1.05552900 |
| P | -2.59263900 | 1.31272600  | -0.25568300 |
| C | -5.48358800 | 3.77792400  | -2.91249100 |
| C | -5.18278000 | 4.23609200  | -1.62958900 |
| C | -4.33480600 | 3.50134700  | -0.79704100 |
| C | -3.78090600 | 2.29579900  | -1.24597100 |
| C | -4.07640800 | 1.84764600  | -2.54566500 |
| C | -4.92796900 | 2.57893400  | -3.37039100 |
| H | -4.09197500 | 3.88482500  | 0.18700300  |
| H | -3.62450000 | 0.93320700  | -2.91848700 |
| C | 2.39881900  | -4.58798900 | -2.66677800 |
| C | 1.40454200  | -4.02954300 | -3.47586500 |
| C | 0.52743100  | -3.08548100 | -2.94942500 |
| C | 0.61051500  | -2.69933100 | -1.59901900 |
| C | 1.58723800  | -3.28906800 | -0.78839100 |
| C | 2.48595000  | -4.21570400 | -1.32647400 |
| H | -0.23795100 | -2.65549400 | -3.59016400 |
| H | 1.66319300  | -3.04526400 | 0.26319000  |
| C | -4.25493600 | -4.24430500 | -2.15893300 |
| C | -4.15816200 | -2.96434200 | -2.70508100 |
| C | -3.10425300 | -2.12620000 | -2.33441500 |
| C | -2.14355000 | -2.56293800 | -1.41685600 |
| C | -2.23382400 | -3.86124100 | -0.88858800 |
| C | -3.29071300 | -4.69164100 | -1.24991200 |
| H | -3.02609300 | -1.12875800 | -2.75627200 |
| H | -1.47951800 | -4.21793800 | -0.19388200 |
| C | -1.98831400 | 3.36628600  | 3.83771200  |
| C | -3.26951400 | 3.00520300  | 3.41180500  |
| C | -3.44432400 | 2.40050300  | 2.17005500  |
| C | -2.33837000 | 2.18480200  | 1.32788700  |
| C | -1.05834800 | 2.54484600  | 1.75885900  |
| C | -0.88798600 | 3.12703400  | 3.01571700  |
| H | -4.43612400 | 2.08254100  | 1.86130500  |
| H | -0.19880400 | 2.34068500  | 1.13336200  |
| H | -3.52882000 | -5.28925400 | 3.10620500  |
| C | -3.00666600 | -1.15442500 | 1.09249400  |
| C | -3.57197000 | -0.16845900 | 0.27987900  |
| C | -4.92089500 | -0.29900000 | -0.15151700 |
| H | -5.37220600 | 0.47472400  | -0.75909000 |
| C | -5.66700600 | -1.40132100 | 0.18588900  |
| H | -6.69327800 | -1.48866900 | -0.16126600 |
| C | -5.11553500 | -2.44291500 | 0.96986500  |



|   |             |             |             |
|---|-------------|-------------|-------------|
| C | -3.77338200 | -2.30835900 | 1.45032900  |
| H | -2.21134500 | -3.27526800 | 2.60373900  |
| C | -3.22621600 | -3.36377000 | 2.23278000  |
| C | -3.96450400 | -4.49197300 | 2.51091100  |
| H | -5.85908200 | -5.52019500 | 2.25465700  |
| C | -5.28939800 | -4.62379500 | 2.02758100  |
| H | -6.86851300 | -3.70825300 | 0.90237300  |
| C | -5.85215100 | -3.61718000 | 1.27650800  |
| H | -0.74653200 | 0.44660600  | 6.67715600  |
| C | 1.01463800  | -0.51592000 | 2.52808500  |
| H | 2.01606300  | -0.27228000 | 2.86698100  |
| C | 0.80115600  | -0.90356700 | 1.22983800  |
| H | 1.63663400  | -0.93255900 | 0.54147200  |
| C | -0.50808500 | -1.22398300 | 0.76114300  |
| C | -1.60292900 | -1.02872000 | 1.60057600  |
| C | -1.39620800 | -0.63582200 | 2.96801400  |
| C | -0.06468000 | -0.39754900 | 3.43815400  |
| H | 1.16646600  | 0.18343600  | 5.11446500  |
| C | 0.14777500  | -0.00377100 | 4.78466700  |
| C | -0.91465300 | 0.14820000  | 5.64636100  |
| H | -3.06928700 | 0.05206000  | 5.86765500  |
| C | -2.23352100 | -0.07833400 | 5.18620600  |
| H | -3.48801600 | -0.61006900 | 3.54432700  |
| C | -2.47059800 | -0.45258500 | 3.88195900  |
| H | -6.14014000 | 4.35438200  | -3.55754700 |
| H | 3.09398800  | -5.31429900 | -3.07799400 |
| H | -5.07645500 | -4.89578300 | -2.44257100 |
| H | -1.84861500 | 3.81621900  | 4.81626800  |
| H | -5.60060300 | 5.17314300  | -1.27335600 |
| H | -5.14872600 | 2.22108500  | -4.37183100 |
| H | 1.31706600  | -4.32299300 | -4.51832600 |
| H | 3.25376600  | -4.63837800 | -0.68714300 |
| H | 0.11037700  | 3.37245300  | 3.36015800  |
| H | -4.12809800 | 3.17433300  | 4.05505700  |
| H | -3.36510400 | -5.68612500 | -0.82076000 |
| H | -4.90178400 | -2.61452500 | -3.41543600 |
| C | 1.91615600  | 2.35954800  | -0.65564300 |
| C | 3.13584900  | 2.03738700  | 1.68094700  |
| C | 2.21535200  | 1.22199500  | -1.56626000 |
| C | 4.05500700  | 0.96371400  | 1.57532100  |
| C | 3.19294600  | 0.20853700  | -1.33978200 |
| C | 5.03093600  | -1.60914100 | 0.30161900  |
| C | 6.06674300  | -2.29615600 | -0.35823600 |
| C | 4.28722400  | -2.33495700 | 1.25460500  |

|    |             |             |             |
|----|-------------|-------------|-------------|
| C  | 6.34978800  | -3.63660500 | -0.08224100 |
| H  | 6.67419800  | -1.78544500 | -1.09781000 |
| C  | 4.56924000  | -3.67048100 | 1.54447200  |
| H  | 3.48308400  | -1.84887800 | 1.79853800  |
| C  | 5.60479100  | -4.32746500 | 0.87455000  |
| H  | 7.15975500  | -4.13569700 | -0.60715100 |
| H  | 3.98392800  | -4.19611700 | 2.29466100  |
| H  | 5.83207300  | -5.36567400 | 1.10073900  |
| C  | 6.03780400  | 1.24039800  | -0.77076600 |
| C  | 7.27587300  | 1.08380600  | 0.13805100  |
| C  | 6.39146000  | 0.84211800  | -2.21980100 |
| C  | 5.60901800  | 2.72650800  | -0.78064100 |
| H  | 7.06084200  | 1.38742000  | 1.16977900  |
| H  | 7.64542400  | 0.05272300  | 0.16279000  |
| H  | 8.09358600  | 1.72042800  | -0.22709200 |
| H  | 5.53572500  | 0.95696100  | -2.89443400 |
| H  | 7.19629500  | 1.48946300  | -2.59437800 |
| H  | 6.74620300  | -0.19016300 | -2.30724800 |
| H  | 6.42412900  | 3.34366000  | -1.18293100 |
| H  | 4.72799600  | 2.89427300  | -1.41148400 |
| H  | 5.38012500  | 3.09638900  | 0.22444300  |
| C  | 2.60678200  | -0.85750800 | -3.49270200 |
| H  | 2.77926000  | -1.65757200 | -4.20246300 |
| C  | 1.49440200  | 1.16879500  | -2.80626500 |
| C  | 1.68559300  | 0.14333300  | -3.74560800 |
| H  | 1.13238000  | 0.17668300  | -4.67984800 |
| C  | 3.33662800  | -0.80679500 | -2.30267300 |
| H  | 4.06391900  | -1.59345300 | -2.12749100 |
| H  | 0.95760200  | 2.04294200  | -3.15292500 |
| C  | 2.93255700  | 2.62491900  | 2.95217400  |
| H  | 2.25926900  | 3.47342400  | 3.03428400  |
| C  | 4.70051700  | 0.51970700  | 2.74454500  |
| C  | 4.45808400  | 1.08751900  | 3.99586200  |
| H  | 4.97503900  | 0.71326700  | 4.87478800  |
| C  | 3.56535900  | 2.15555100  | 4.09655500  |
| H  | 3.37448300  | 2.62929300  | 5.05534900  |
| H  | 5.41366600  | -0.29637200 | 2.67811300  |
| Pd | -0.64807400 | 0.91518500  | -1.52343800 |
| C  | 0.93358100  | 3.36431900  | -1.19483700 |
| C  | -0.35774700 | 2.97073000  | -1.60811500 |
| C  | 1.31272800  | 4.70909300  | -1.31745400 |
| C  | -1.20821000 | 3.91025100  | -2.18849900 |
| C  | 0.43738500  | 5.65482600  | -1.85435800 |
| H  | 2.31252400  | 5.00422600  | -1.00959500 |

|    |             |            |             |
|----|-------------|------------|-------------|
| C  | -0.81677100 | 5.25129600 | -2.30430000 |
| H  | -2.17914000 | 3.62047900 | -2.56707000 |
| H  | 0.74828100  | 6.69174400 | -1.94395000 |
| H  | -1.49759200 | 5.96930400 | -2.75390800 |
| Si | 4.58318300  | 0.20188300 | -0.05424200 |
| C  | 2.33157700  | 2.64024700 | 0.61542800  |
| H  | 1.87449500  | 3.55756600 | 0.97985900  |

**TS3-cf1**

|    |             |             |             |
|----|-------------|-------------|-------------|
| C  | 2.11376500  | -0.95901700 | -1.34360600 |
| C  | 2.73942000  | -1.68703600 | -2.37543300 |
| C  | 0.82337800  | -0.46477500 | -1.63308900 |
| C  | 2.15598500  | -1.85508200 | -3.63450600 |
| H  | 3.71680900  | -2.12214800 | -2.21243100 |
| C  | 0.28326400  | -0.51862200 | -2.92520500 |
| C  | 0.94184700  | -1.23502500 | -3.92590300 |
| H  | 2.67424100  | -2.43277100 | -4.39500900 |
| H  | -0.66245100 | -0.03085800 | -3.14050500 |
| H  | 0.50468100  | -1.30944500 | -4.91797200 |
| C  | 3.06364600  | 1.62425900  | -0.43302400 |
| C  | 1.85104100  | 2.19892000  | -0.88641500 |
| C  | 4.18980600  | 2.46377200  | -0.41314500 |
| C  | 1.80819800  | 3.52972300  | -1.35078400 |
| C  | 4.14947400  | 3.78572000  | -0.85895800 |
| C  | 2.95424200  | 4.31709300  | -1.34374200 |
| H  | 0.86243300  | 3.93830100  | -1.69417200 |
| H  | 5.04907300  | 4.39423200  | -0.82927500 |
| H  | 2.90929300  | 5.34021700  | -1.70643000 |
| H  | 5.13194800  | 2.08620000  | -0.03518500 |
| Pd | -0.69976900 | -0.31007600 | -0.27172700 |
| O  | -3.45515500 | -2.46421400 | 0.93175900  |
| S  | -3.77157100 | -1.01841300 | 1.03698100  |
| O  | -2.54633200 | -0.13493500 | 0.94322700  |
| O  | -4.70851100 | -0.59952100 | 2.07501100  |
| C  | -4.65175800 | -0.69039200 | -0.57944300 |
| F  | -3.75618400 | -0.62938300 | -1.59691100 |
| F  | -5.31836800 | 0.47245500  | -0.54848100 |
| F  | -5.51630000 | -1.67094500 | -0.84812900 |
| Si | 3.11838400  | -0.20795000 | 0.09726200  |
| C  | 0.54754700  | 1.56878600  | -0.77886700 |
| C  | -0.68324800 | 1.75501900  | -0.53326700 |
| C  | -1.71738100 | 2.70542600  | -0.18713900 |
| C  | -1.36630300 | 3.84439200  | 0.56252900  |
| C  | -3.04853500 | 2.51818100  | -0.58104700 |

|   |             |             |             |
|---|-------------|-------------|-------------|
| C | -2.34304500 | 4.77381400  | 0.91125500  |
| H | -0.33294300 | 3.98678300  | 0.86569900  |
| C | -4.01979700 | 3.45111500  | -0.22849200 |
| H | -3.30794100 | 1.64006000  | -1.15322600 |
| C | -3.67126000 | 4.57825700  | 0.51935200  |
| H | -2.06910700 | 5.64884300  | 1.49435300  |
| H | -5.05091800 | 3.28430300  | -0.52465700 |
| H | -4.43211500 | 5.30063800  | 0.80164800  |
| N | -0.78239300 | -2.53091100 | -0.03349000 |
| H | -1.75889300 | -2.62909600 | 0.27245200  |
| C | 0.05524200  | -3.03133600 | 1.08415300  |
| C | -0.45106700 | -2.51866100 | 2.42830000  |
| H | 0.03173200  | -4.13225500 | 1.07801200  |
| H | 1.09037900  | -2.72703200 | 0.90085200  |
| H | 0.14103100  | -2.95299700 | 3.23760900  |
| H | -1.50002700 | -2.79391700 | 2.57176400  |
| H | -0.37039100 | -1.43079100 | 2.49839700  |
| C | -0.63282200 | -3.33984200 | -1.26798700 |
| C | -1.81158800 | -3.13817700 | -2.21544100 |
| H | 0.31345400  | -3.07883100 | -1.74791200 |
| H | -0.57239600 | -4.40242400 | -0.98754500 |
| H | -1.67827400 | -3.75244600 | -3.11243200 |
| H | -1.90090200 | -2.09534000 | -2.52559000 |
| H | -2.75221600 | -3.42564300 | -1.73337300 |
| C | 4.93693900  | -0.89696600 | 0.14263000  |
| C | 5.67849500  | -0.33415100 | 1.38158400  |
| C | 4.95853100  | -2.44341600 | 0.25987300  |
| C | 5.74742500  | -0.50870600 | -1.12032100 |
| H | 5.74481000  | 0.75880200  | 1.37732200  |
| H | 5.19469400  | -0.62455300 | 2.31852500  |
| H | 6.70696900  | -0.72182500 | 1.40159800  |
| H | 4.40937200  | -2.94861800 | -0.53966500 |
| H | 5.99835700  | -2.79714600 | 0.21576000  |
| H | 4.54763600  | -2.79706200 | 1.20944000  |
| H | 6.76806500  | -0.90748900 | -1.03235700 |
| H | 5.32022200  | -0.91107100 | -2.04230200 |
| H | 5.83127200  | 0.57191900  | -1.25536300 |
| C | 2.36730800  | -0.27339300 | 1.84186500  |
| C | 2.64093400  | -1.31880600 | 2.74543500  |
| C | 1.61074300  | 0.80876700  | 2.33477500  |
| C | 2.20524600  | -1.27989800 | 4.07020100  |
| H | 3.20382200  | -2.18688200 | 2.42140900  |
| C | 1.14471200  | 0.84102200  | 3.65074900  |
| H | 1.38058600  | 1.64934800  | 1.69120400  |

|   |            |             |            |
|---|------------|-------------|------------|
| C | 1.44933800 | -0.19983700 | 4.52777600 |
| H | 2.44420500 | -2.10210400 | 4.73980400 |
| H | 0.54958600 | 1.68503700  | 3.98852300 |
| H | 1.09714700 | -0.17271900 | 5.55526100 |

**TS3-cf2**

|    |             |             |             |
|----|-------------|-------------|-------------|
| C  | -1.64308300 | -0.10771200 | -1.13351800 |
| C  | -2.39488600 | -0.68195400 | -2.17848000 |
| C  | -0.31820100 | 0.22220100  | -1.44123700 |
| C  | -1.86076700 | -0.87372500 | -3.45337800 |
| H  | -3.42653100 | -0.96521200 | -1.99358100 |
| C  | 0.20386700  | 0.14399700  | -2.73312500 |
| C  | -0.57118700 | -0.43322000 | -3.74261400 |
| H  | -2.46531900 | -1.33898900 | -4.22676100 |
| H  | 1.21364700  | 0.47941600  | -2.94978000 |
| H  | -0.15850900 | -0.54331800 | -4.74170600 |
| C  | -2.04078600 | 2.35033200  | 0.50657800  |
| C  | -0.77519100 | 2.85676500  | 0.12833000  |
| C  | -2.99202500 | 3.27955200  | 0.96735100  |
| C  | -0.51911000 | 4.24437100  | 0.17149200  |
| C  | -2.73353800 | 4.64858800  | 1.02668900  |
| C  | -1.49149200 | 5.13384100  | 0.61292100  |
| H  | 0.45808400  | 4.61061000  | -0.13057300 |
| H  | -3.49897000 | 5.33183500  | 1.38449000  |
| H  | -1.27667900 | 6.19867000  | 0.63928000  |
| H  | -3.97286400 | 2.92212100  | 1.26811200  |
| Pd | 1.26787700  | 0.03250400  | -0.16205200 |
| O  | 0.58215600  | -2.03782300 | 0.20891000  |
| S  | 1.08137700  | -3.20152900 | -0.63042500 |
| O  | 0.37119900  | -3.40555900 | -1.89298400 |
| O  | 2.56425000  | -3.25797400 | -0.66075000 |
| C  | 0.58031600  | -4.60570700 | 0.48249300  |
| F  | -0.74733300 | -4.60012500 | 0.66732400  |
| F  | 0.93741100  | -5.77392600 | -0.06052100 |
| F  | 1.17791700  | -4.48572400 | 1.67951500  |
| Si | -2.53045800 | 0.51554900  | 0.41544200  |
| C  | 0.38806100  | 2.05483600  | -0.22070400 |
| C  | 1.65922400  | 2.05670200  | -0.28069300 |
| C  | 2.93108000  | 2.73919900  | -0.21562400 |
| C  | 3.64980700  | 3.03742900  | -1.38576100 |
| C  | 3.47508500  | 3.08336200  | 1.03591200  |
| C  | 4.89289800  | 3.66207500  | -1.30292600 |
| H  | 3.23115800  | 2.76696300  | -2.35010100 |
| C  | 4.71815500  | 3.70889500  | 1.11008000  |

|   |             |             |             |
|---|-------------|-------------|-------------|
| H | 2.91575900  | 2.85238600  | 1.93727200  |
| C | 5.43230800  | 3.99469000  | -0.05716600 |
| H | 5.44330800  | 3.88589200  | -2.21234600 |
| H | 5.13131700  | 3.97068300  | 2.08015500  |
| H | 6.40411900  | 4.47619700  | 0.00377900  |
| C | -2.18439500 | -0.29629600 | 2.12843600  |
| C | -4.37441800 | 0.45731000  | -0.03556900 |
| C | -5.23481300 | -0.57766600 | 0.37399500  |
| C | -4.90191600 | 1.41854300  | -0.92137600 |
| C | -6.56093100 | -0.64255500 | -0.06126500 |
| H | -4.87338800 | -1.35602400 | 1.03783900  |
| C | -6.22554200 | 1.36231400  | -1.35896100 |
| H | -4.26821300 | 2.22651000  | -1.27762700 |
| C | -7.06179800 | 0.33054100  | -0.92668200 |
| H | -7.19987200 | -1.45499600 | 0.27527600  |
| H | -6.60278100 | 2.12147500  | -2.03956500 |
| H | -8.09330100 | 0.28291100  | -1.26604200 |
| C | -3.25453600 | 0.19488300  | 3.13144700  |
| H | -4.26709200 | -0.11871000 | 2.86194200  |
| H | -3.03564800 | -0.21200800 | 4.12909200  |
| H | -3.25602500 | 1.28899000  | 3.21892100  |
| C | -2.19437400 | -1.83710500 | 2.04423300  |
| H | -1.43164700 | -2.20692800 | 1.35596000  |
| H | -1.98721400 | -2.26376100 | 3.03681200  |
| H | -3.16266000 | -2.23577100 | 1.72167700  |
| C | -0.81039300 | 0.16064600  | 2.66134000  |
| H | 0.00324900  | -0.14711200 | 1.99928400  |
| H | -0.75469900 | 1.24926600  | 2.77757600  |
| H | -0.62331500 | -0.29311500 | 3.64537300  |
| N | 3.25990200  | -0.71395200 | 0.58394700  |
| H | 3.11790500  | -1.70039100 | 0.33402100  |
| C | 4.45196200  | -0.26270600 | -0.17521100 |
| C | 4.26967000  | -0.43737100 | -1.67937100 |
| H | 5.32267300  | -0.84678500 | 0.16077100  |
| H | 4.64697400  | 0.78247100  | 0.07754600  |
| H | 5.20075400  | -0.18857100 | -2.20017800 |
| H | 3.99256200  | -1.46856800 | -1.91972600 |
| H | 3.48332100  | 0.22380700  | -2.05773600 |
| C | 3.46355700  | -0.63391500 | 2.05305300  |
| C | 2.59516900  | -1.64043900 | 2.80322700  |
| H | 3.25165200  | 0.39322100  | 2.37064400  |
| H | 4.52330300  | -0.82700300 | 2.28042300  |
| H | 2.75502600  | -1.53853000 | 3.88212300  |
| H | 1.53463300  | -1.49884300 | 2.59120800  |

|                |             |             |             |
|----------------|-------------|-------------|-------------|
| H              | 2.84856000  | -2.66489800 | 2.51174700  |
| <b>TS3-cf3</b> |             |             |             |
| C              | -1.94290800 | -0.42850100 | -1.16365100 |
| C              | -2.83923500 | -0.95735500 | -2.11548700 |
| C              | -0.74393900 | 0.11892400  | -1.66846800 |
| C              | -2.59638700 | -0.87831100 | -3.48883300 |
| H              | -3.76535100 | -1.41145900 | -1.77792600 |
| C              | -0.54728800 | 0.31381800  | -3.04354800 |
| C              | -1.46977700 | -0.20050800 | -3.95696200 |
| H              | -3.31036500 | -1.30405700 | -4.18865800 |
| H              | 0.34373200  | 0.82216900  | -3.40093700 |
| H              | -1.29959200 | -0.08019500 | -5.02387300 |
| C              | -2.46844200 | 1.88846300  | 0.51993700  |
| C              | -1.33817300 | 2.53399000  | -0.03098800 |
| C              | -3.48943900 | 2.70384200  | 1.03840400  |
| C              | -1.27470200 | 3.94109500  | -0.09054200 |
| C              | -3.42301700 | 4.09665400  | 0.99299200  |
| C              | -2.31260400 | 4.71597600  | 0.41650900  |
| H              | -0.39580900 | 4.41501300  | -0.51750100 |
| H              | -4.23469900 | 4.69351600  | 1.39981000  |
| H              | -2.24954100 | 5.79947300  | 0.36516700  |
| H              | -4.36602100 | 2.23617900  | 1.47779100  |
| Pd             | 1.07565000  | -0.10851200 | -0.75549800 |
| O              | 3.71914700  | -2.75635000 | -0.07053300 |
| S              | 3.88966800  | -1.45380700 | 0.61482600  |
| O              | 5.22212700  | -1.08287100 | 1.08376200  |
| O              | 3.17219100  | -0.32107600 | -0.08817400 |
| C              | 2.85972000  | -1.66459800 | 2.15233100  |
| F              | 3.44360900  | -2.49667000 | 3.01467000  |
| F              | 2.65693600  | -0.48269800 | 2.76173900  |
| F              | 1.65119100  | -2.17687500 | 1.82053800  |
| Si             | -2.61559900 | -0.00162400 | 0.56740800  |
| C              | -0.12050900 | 1.86041800  | -0.45964400 |
| C              | 1.14428600  | 1.94583100  | -0.39833900 |
| C              | 2.33768700  | 2.73547200  | -0.23729100 |
| C              | 2.54556600  | 3.83190000  | -1.09864200 |
| C              | 3.27473900  | 2.45689700  | 0.77498500  |
| C              | 3.66921400  | 4.63884100  | -0.94135500 |
| H              | 1.82501300  | 4.03341900  | -1.88632100 |
| C              | 4.39188200  | 3.27375400  | 0.92429600  |
| H              | 3.12191000  | 1.60364900  | 1.42156200  |
| C              | 4.59431300  | 4.36109000  | 0.06952100  |
| H              | 3.82479000  | 5.48194100  | -1.60874300 |

|   |             |             |             |
|---|-------------|-------------|-------------|
| H | 5.11335300  | 3.05074500  | 1.70462300  |
| H | 5.47344500  | 4.98852200  | 0.18748900  |
| C | -1.81365100 | -0.59298600 | 2.22607800  |
| C | -4.46261300 | -0.44066400 | 0.49698500  |
| C | -5.01680900 | -1.57260300 | 1.12180900  |
| C | -5.32859100 | 0.34371500  | -0.29292000 |
| C | -6.36804400 | -1.89951500 | 0.98207400  |
| H | -4.39402200 | -2.21922200 | 1.73085600  |
| C | -6.67958300 | 0.02597000  | -0.43581500 |
| H | -4.94025700 | 1.21712900  | -0.81006000 |
| C | -7.20515500 | -1.09822200 | 0.20513700  |
| H | -6.76429000 | -2.78014200 | 1.48105700  |
| H | -7.32073200 | 0.65433100  | -1.04880200 |
| H | -8.25713700 | -1.34886900 | 0.09664800  |
| C | -2.77482100 | -0.15492200 | 3.35993400  |
| H | -3.74240700 | -0.66341200 | 3.32169700  |
| H | -2.31605400 | -0.38401400 | 4.33197800  |
| H | -2.96255300 | 0.92544700  | 3.33564500  |
| C | -1.57864000 | -2.11484600 | 2.30994800  |
| H | -0.79407400 | -2.43779400 | 1.62263900  |
| H | -1.24209000 | -2.38136200 | 3.32180600  |
| H | -2.47570500 | -2.70655000 | 2.09980800  |
| C | -0.46588700 | 0.11858500  | 2.46705400  |
| H | 0.27330700  | -0.13066900 | 1.70367700  |
| H | -0.57454300 | 1.20817300  | 2.48600000  |
| H | -0.04779200 | -0.19522700 | 3.43301800  |
| N | 1.17987000  | -2.24420000 | -1.41995200 |
| H | 1.98374300  | -2.56342100 | -0.86740400 |
| C | 0.02185300  | -3.11628200 | -1.09036000 |
| C | 0.44773400  | -4.53198500 | -0.70017400 |
| H | -0.65547100 | -3.11807500 | -1.95027700 |
| H | -0.53243600 | -2.65686800 | -0.27217900 |
| H | -0.43043500 | -5.14469700 | -0.46712200 |
| H | 1.00293400  | -5.02685300 | -1.50445700 |
| H | 1.09102100  | -4.50281000 | 0.18648400  |
| C | 1.57624400  | -2.37110700 | -2.84769500 |
| C | 2.88356300  | -1.64911200 | -3.15928200 |
| H | 0.75688900  | -1.96573200 | -3.44900800 |
| H | 1.67394600  | -3.43716400 | -3.09998700 |
| H | 3.15240400  | -1.81250300 | -4.20882500 |
| H | 2.79261400  | -0.57059900 | -2.98992400 |
| H | 3.69410700  | -2.01718900 | -2.52504300 |

**TS4-cf1**



|    |             |             |             |
|----|-------------|-------------|-------------|
| C  | 1.75724900  | 0.80241500  | -1.10281200 |
| C  | 2.62807100  | 1.06373300  | -2.18051800 |
| C  | 0.37879500  | 1.06385900  | -1.32526100 |
| C  | 2.18857900  | 1.64677100  | -3.37067100 |
| H  | 3.68408100  | 0.82647600  | -2.08099900 |
| C  | -0.05996700 | 1.68846300  | -2.50724500 |
| C  | 0.84181300  | 1.98643800  | -3.52489300 |
| H  | 2.89964000  | 1.85196700  | -4.16626800 |
| H  | -1.11040200 | 1.93470400  | -2.62045400 |
| H  | 0.49278400  | 2.46257300  | -4.43754200 |
| C  | 1.63491200  | -0.47360900 | 1.92474400  |
| C  | 0.25983900  | -0.18328600 | 2.13585800  |
| C  | 2.25036600  | -1.34913200 | 2.83195600  |
| C  | -0.46519300 | -0.77910100 | 3.17900500  |
| C  | 1.54231900  | -1.91363200 | 3.89718600  |
| C  | 0.18512800  | -1.63152500 | 4.06678800  |
| H  | -1.52773600 | -0.58896300 | 3.26281100  |
| H  | 2.04755100  | -2.58882700 | 4.58243600  |
| H  | -0.37326800 | -2.09153000 | 4.87673800  |
| C  | -0.37229000 | 0.64358600  | 1.14917700  |
| C  | -0.47560900 | 1.64121800  | 0.34338600  |
| H  | 3.29571400  | -1.61231700 | 2.69512200  |
| Pd | -0.87178700 | -0.39761200 | -0.55507000 |
| O  | -3.80770500 | -2.47411700 | -0.82521100 |
| S  | -3.38192600 | -2.23688200 | 0.57394900  |
| O  | -3.89679200 | -3.12474700 | 1.61459600  |
| O  | -1.89783600 | -1.96973900 | 0.68704400  |
| C  | -4.11601200 | -0.56450800 | 0.98143900  |
| F  | -5.43763900 | -0.65372000 | 1.14000200  |
| F  | -3.58157400 | -0.06742700 | 2.11913300  |
| F  | -3.86656400 | 0.32937000  | 0.00096400  |
| Si | 2.65804800  | 0.29736900  | 0.51969800  |
| C  | -1.03587300 | 2.98509900  | 0.28551700  |
| C  | -2.24660900 | 3.22448500  | 0.96247300  |
| C  | -0.40182900 | 4.03754000  | -0.39463700 |
| C  | -2.80202200 | 4.50205100  | 0.96525100  |
| H  | -2.74484600 | 2.39535200  | 1.45421000  |
| C  | -0.95938800 | 5.31420500  | -0.37805900 |
| H  | 0.52570400  | 3.85020900  | -0.92481000 |
| C  | -2.15950800 | 5.54930700  | 0.29888400  |
| H  | -3.74002000 | 4.67856900  | 1.48399400  |
| H  | -0.45728200 | 6.12665100  | -0.89581800 |
| H  | -2.59530500 | 6.54457100  | 0.30230300  |
| C  | 3.88595800  | -1.04008800 | -0.01685300 |

|   |             |             |             |
|---|-------------|-------------|-------------|
| C | 5.23087900  | -0.80317200 | -0.35170300 |
| C | 3.40192200  | -2.35468100 | -0.16941700 |
| C | 6.05670700  | -1.82902100 | -0.81929300 |
| H | 5.65200100  | 0.19199900  | -0.24793400 |
| C | 4.21919200  | -3.38313900 | -0.63851200 |
| H | 2.37218900  | -2.58236100 | 0.09196200  |
| C | 5.55199100  | -3.12176900 | -0.96589200 |
| H | 7.09376400  | -1.61711100 | -1.06686000 |
| H | 3.81702400  | -4.38752700 | -0.74413000 |
| H | 6.19280900  | -3.92074500 | -1.32952500 |
| C | 3.50282400  | 1.87074200  | 1.26694600  |
| C | 4.48897600  | 1.42732400  | 2.37117500  |
| H | 4.94848900  | 2.31094400  | 2.83671400  |
| H | 3.98071900  | 0.86694100  | 3.16401500  |
| H | 5.29826500  | 0.79908600  | 1.98375000  |
| C | 4.25060700  | 2.71820300  | 0.21694300  |
| H | 3.57779700  | 3.07891800  | -0.56830200 |
| H | 4.69736600  | 3.59781600  | 0.70200800  |
| H | 5.06508500  | 2.17258900  | -0.27201200 |
| C | 2.42011300  | 2.76376200  | 1.91373300  |
| H | 1.71258900  | 3.15354200  | 1.17542000  |
| H | 1.84685100  | 2.22920600  | 2.67896600  |
| H | 2.89442500  | 3.62861700  | 2.39936600  |
| N | -1.43333500 | -1.59667400 | -2.35802200 |
| H | -2.19810100 | -2.14898700 | -1.95131000 |
| C | -1.98796300 | -0.86342100 | -3.51676900 |
| C | -3.22435800 | -0.05344200 | -3.13838200 |
| H | -2.24454700 | -1.58159200 | -4.31155100 |
| H | -1.19697100 | -0.21583700 | -3.90982200 |
| H | -3.63027300 | 0.44593000  | -4.02508700 |
| H | -3.99629900 | -0.70034300 | -2.71188200 |
| H | -2.98855800 | 0.70689300  | -2.38749300 |
| C | -0.32869700 | -2.50558500 | -2.74509300 |
| C | 0.01115500  | -3.49211000 | -1.63078500 |
| H | 0.53994900  | -1.88449200 | -2.99415200 |
| H | -0.60799500 | -3.05971700 | -3.65532700 |
| H | 0.85055600  | -4.12611800 | -1.93581600 |
| H | 0.28389100  | -2.97257000 | -0.70734800 |
| H | -0.84572300 | -4.13375200 | -1.39925700 |

**TS4-cf2**

|   |             |             |            |
|---|-------------|-------------|------------|
| C | 1.07019700  | -0.03605200 | 1.84587200 |
| C | 1.20450100  | 0.20049000  | 3.22964900 |
| C | -0.07591000 | 0.53817000  | 1.23643400 |

|    |             |             |             |
|----|-------------|-------------|-------------|
| C  | 0.33229900  | 1.02115200  | 3.94795200  |
| H  | 2.01760300  | -0.26138000 | 3.77216700  |
| C  | -0.92852000 | 1.40114800  | 1.93823800  |
| C  | -0.72177500 | 1.65330700  | 3.29367800  |
| H  | 0.48768900  | 1.16894300  | 5.01314500  |
| H  | -1.78614500 | 1.83554200  | 1.44279000  |
| H  | -1.40688700 | 2.30236800  | 3.83179600  |
| C  | 2.08561300  | -2.03602900 | -0.46523400 |
| C  | 1.29075400  | -1.52499300 | -1.53278700 |
| C  | 2.57552900  | -3.33973300 | -0.61637000 |
| C  | 1.13713700  | -2.23842500 | -2.72962700 |
| C  | 2.37882000  | -4.07654000 | -1.79029800 |
| C  | 1.69728200  | -3.50827500 | -2.86522500 |
| H  | 0.56744700  | -1.79884700 | -3.54104000 |
| H  | 2.77768800  | -5.08416400 | -1.86681400 |
| H  | 1.57660500  | -4.05769100 | -3.79455900 |
| C  | 0.55706000  | -0.31183600 | -1.27035200 |
| C  | 0.41215300  | 0.87860400  | -0.81264500 |
| H  | 3.13120900  | -3.80440200 | 0.18904500  |
| Pd | -1.16043600 | -0.48953600 | -0.17743200 |
| O  | -5.23000800 | -0.58989100 | 2.13951400  |
| S  | -4.37510200 | -0.42126400 | 0.96713000  |
| O  | -4.81479100 | -1.04348800 | -0.30652200 |
| O  | -2.90595300 | -0.64723400 | 1.24536200  |
| C  | -4.42592000 | 1.40290300  | 0.58963800  |
| F  | -5.63122000 | 1.76657000  | 0.14782000  |
| F  | -3.51326800 | 1.71133000  | -0.36277200 |
| F  | -4.12952900 | 2.12574600  | 1.68322500  |
| Si | 2.56544900  | -0.80785900 | 0.92102700  |
| C  | 0.66452500  | 2.27028600  | -1.14370700 |
| C  | 1.17908800  | 2.52365800  | -2.43245500 |
| C  | 0.46953100  | 3.34945800  | -0.26843400 |
| C  | 1.50413700  | 3.81807900  | -2.82184000 |
| H  | 1.32685000  | 1.69055600  | -3.11200600 |
| C  | 0.78143900  | 4.64604900  | -0.67132300 |
| H  | 0.09713200  | 3.17031600  | 0.73095500  |
| C  | 1.30252600  | 4.88664500  | -1.94386600 |
| H  | 1.91093000  | 3.99349300  | -3.81374000 |
| H  | 0.62328300  | 5.47068200  | 0.01803500  |
| H  | 1.54738700  | 5.89944000  | -2.25167700 |
| C  | 3.41476300  | 0.63435400  | 0.03179600  |
| C  | 4.06297200  | 0.46231500  | -1.20454900 |
| C  | 3.44087200  | 1.91535300  | 0.61097200  |
| C  | 4.70392800  | 1.52733500  | -1.84042100 |

|   |             |             |             |
|---|-------------|-------------|-------------|
| H | 4.05782000  | -0.51242600 | -1.68613300 |
| C | 4.07955200  | 2.98408500  | -0.01990600 |
| H | 2.93336700  | 2.08869100  | 1.55696400  |
| C | 4.71084100  | 2.79275200  | -1.24984700 |
| H | 5.19260100  | 1.37057600  | -2.79894600 |
| H | 4.06723000  | 3.96879300  | 0.43924900  |
| H | 5.19931900  | 3.62594200  | -1.74812200 |
| C | 3.92440200  | -1.55896200 | 2.08836500  |
| C | 4.54976500  | -0.48077600 | 3.01129300  |
| H | 5.39482300  | -0.92250300 | 3.55789800  |
| H | 4.93645200  | 0.36584700  | 2.43427100  |
| H | 3.86294300  | -0.08199700 | 3.76059100  |
| C | 5.10427500  | -2.05706900 | 1.21107400  |
| H | 5.90345700  | -2.43729100 | 1.86273200  |
| H | 4.83864500  | -2.86257000 | 0.52453800  |
| H | 5.52718300  | -1.24168300 | 0.61381300  |
| C | 3.38220400  | -2.72245600 | 2.94534900  |
| H | 4.18505500  | -3.14455000 | 3.56663800  |
| H | 2.58045900  | -2.40103700 | 3.61954700  |
| H | 2.97980000  | -3.53871700 | 2.33453800  |
| N | -2.34474200 | -1.85081900 | -1.52840100 |
| H | -3.26605600 | -1.71315300 | -1.09296500 |
| C | -2.47887800 | -1.42602600 | -2.93922300 |
| C | -2.98546100 | 0.00858100  | -3.05862400 |
| H | -3.16453000 | -2.11195600 | -3.46144200 |
| H | -1.49945800 | -1.52776000 | -3.41710600 |
| H | -3.15179600 | 0.25986600  | -4.11197900 |
| H | -3.92700200 | 0.13232800  | -2.51635800 |
| H | -2.26076400 | 0.71758000  | -2.64545000 |
| C | -1.99655400 | -3.28467200 | -1.40059200 |
| C | -1.89105100 | -3.71447800 | 0.06035200  |
| H | -1.04387800 | -3.44802800 | -1.91339000 |
| H | -2.75698600 | -3.88946600 | -1.91941000 |
| H | -1.73228200 | -4.79657800 | 0.12267900  |
| H | -1.04883200 | -3.21772400 | 0.55632100  |
| H | -2.80016000 | -3.46071600 | 0.61432100  |

**TS4-cf3**

|   |             |             |            |
|---|-------------|-------------|------------|
| C | -1.16489000 | 0.20974600  | 1.69598600 |
| C | -1.53040100 | 0.23647500  | 3.05493300 |
| C | -0.76330000 | -1.06359300 | 1.19444300 |
| C | -1.64175500 | -0.92173200 | 3.83219400 |
| H | -1.75869900 | 1.18198100  | 3.52811800 |
| C | -0.94193500 | -2.23712200 | 1.94575100 |

|    |             |             |             |
|----|-------------|-------------|-------------|
| C  | -1.39711700 | -2.17145200 | 3.26149600  |
| H  | -1.94625800 | -0.84339200 | 4.87225100  |
| H  | -0.70303400 | -3.19617600 | 1.49650900  |
| H  | -1.52157300 | -3.08167000 | 3.84226200  |
| C  | -0.33008200 | 2.10513700  | -0.79415100 |
| C  | 0.05343900  | 1.04569900  | -1.67021200 |
| C  | 0.24066600  | 3.35860100  | -1.05337300 |
| C  | 0.91485800  | 1.25585400  | -2.75771000 |
| C  | 1.09244500  | 3.57595700  | -2.14067400 |
| C  | 1.41303800  | 2.53067600  | -3.00570200 |
| H  | 1.21814100  | 0.41055400  | -3.36394500 |
| H  | 1.51680700  | 4.56329900  | -2.29965300 |
| H  | 2.08751000  | 2.69414200  | -3.84031100 |
| C  | -0.34063400 | -0.27600200 | -1.28119800 |
| C  | -1.12546400 | -1.16158300 | -0.77990100 |
| H  | 0.04057100  | 4.19342100  | -0.39400800 |
| Pd | 0.98612600  | -1.04863700 | 0.10816500  |
| O  | 4.99462200  | -0.38140200 | -2.23738700 |
| S  | 4.12667100  | -0.38852900 | -1.06131500 |
| O  | 4.65032700  | -1.02394500 | 0.17457900  |
| O  | 2.69903400  | -0.78523700 | -1.35858200 |
| C  | 3.95669400  | 1.41455100  | -0.57040500 |
| F  | 4.93057300  | 1.75952100  | 0.28263900  |
| F  | 2.77359000  | 1.63319000  | 0.04330000  |
| F  | 4.02626000  | 2.21045000  | -1.64311100 |
| Si | -1.61180400 | 1.72032100  | 0.57210100  |
| C  | -2.13875800 | -2.12495600 | -1.18121900 |
| C  | -2.10920900 | -2.58469500 | -2.51329500 |
| C  | -3.15891900 | -2.57120900 | -0.32706500 |
| C  | -3.08481700 | -3.46171800 | -2.97725800 |
| H  | -1.30950500 | -2.24801500 | -3.16579300 |
| C  | -4.13310500 | -3.44819300 | -0.79837700 |
| H  | -3.19898000 | -2.21101500 | 0.69243500  |
| C  | -4.10017500 | -3.89676000 | -2.12041700 |
| H  | -3.04970700 | -3.80992900 | -4.00565700 |
| H  | -4.92506400 | -3.77640300 | -0.13102300 |
| H  | -4.85980000 | -4.58463100 | -2.48155000 |
| C  | -3.19697500 | 1.15425100  | -0.30005500 |
| C  | -3.42231000 | 1.39380600  | -1.66690800 |
| C  | -4.20677300 | 0.49235400  | 0.42239600  |
| C  | -4.60119400 | 0.97872400  | -2.28971300 |
| H  | -2.66173000 | 1.89664500  | -2.25849400 |
| C  | -5.39193400 | 0.08505200  | -0.19202100 |
| H  | -4.05917500 | 0.27289900  | 1.47751900  |

|   |             |             |             |
|---|-------------|-------------|-------------|
| C | -5.58980500 | 0.32311400  | -1.55317800 |
| H | -4.74639900 | 1.16545600  | -3.35069500 |
| H | -6.15334300 | -0.43078300 | 0.38767600  |
| H | -6.50599600 | -0.00380200 | -2.03772800 |
| C | -2.08486600 | 3.31873800  | 1.56628100  |
| C | -3.29931300 | 3.11119300  | 2.50686400  |
| H | -3.57692800 | 4.07833000  | 2.94920000  |
| H | -4.17221800 | 2.73807600  | 1.96179900  |
| H | -3.11057800 | 2.42865000  | 3.33791100  |
| C | -2.55985200 | 4.39397400  | 0.55180900  |
| H | -2.86539000 | 5.29772700  | 1.09756300  |
| H | -1.79980300 | 4.69494400  | -0.16996300 |
| H | -3.42868500 | 4.04217100  | -0.01619200 |
| C | -0.88866000 | 3.84582300  | 2.38773000  |
| H | -1.15879500 | 4.77991200  | 2.90078400  |
| H | -0.57407600 | 3.12943700  | 3.15619100  |
| H | -0.01155100 | 4.05489700  | 1.76581100  |
| N | 2.37798100  | -1.83040500 | 1.67784000  |
| H | 3.27383600  | -1.55637400 | 1.25129700  |
| C | 2.27621200  | -1.15723600 | 2.99339900  |
| C | 2.51810900  | 0.34576900  | 2.88645900  |
| H | 3.00996200  | -1.60228000 | 3.68426000  |
| H | 1.28018700  | -1.35793400 | 3.39985200  |
| H | 2.49399400  | 0.79706100  | 3.88448800  |
| H | 3.49216600  | 0.55902100  | 2.43478800  |
| H | 1.74905900  | 0.82673700  | 2.27543300  |
| C | 2.39789100  | -3.30470600 | 1.80453600  |
| C | 2.59516500  | -3.98492500 | 0.45241300  |
| H | 1.45640600  | -3.61822000 | 2.26935500  |
| H | 3.20742300  | -3.59690800 | 2.49186600  |
| H | 2.70676200  | -5.06659500 | 0.58566900  |
| H | 1.74136700  | -3.80280200 | -0.21033700 |
| H | 3.49064500  | -3.59776900 | -0.04403700 |

**TS11-cf1**

|   |             |             |             |
|---|-------------|-------------|-------------|
| C | -3.21368700 | -0.69158000 | -1.19871100 |
| C | -3.83547400 | -1.45174100 | -2.21573300 |
| C | -2.02115100 | -0.04263200 | -1.54980700 |
| C | -3.32219500 | -1.52870000 | -3.50900700 |
| H | -4.74988800 | -1.98941800 | -1.99029500 |
| C | -1.54544100 | -0.03366000 | -2.86610700 |
| C | -2.18667100 | -0.79392200 | -3.84693400 |
| H | -3.82483500 | -2.13766800 | -4.25482800 |
| H | -0.66204700 | 0.54064100  | -3.13248500 |

|    |             |             |             |
|----|-------------|-------------|-------------|
| H  | -1.79992600 | -0.80442300 | -4.86282100 |
| C  | -4.54051500 | 1.56902500  | 0.10291500  |
| C  | -3.55482600 | 2.44164500  | -0.41149000 |
| C  | -5.80796600 | 2.11437400  | 0.37383000  |
| C  | -3.87670200 | 3.78547400  | -0.70645500 |
| C  | -6.11683600 | 3.44960300  | 0.11363900  |
| C  | -5.14887400 | 4.28333100  | -0.44766900 |
| H  | -3.11264600 | 4.43848600  | -1.11587300 |
| H  | -7.10964000 | 3.83105800  | 0.33448400  |
| H  | -5.37790300 | 5.31943900  | -0.67985300 |
| H  | -6.58217700 | 1.47120100  | 0.78155100  |
| Si | -4.23873400 | -0.28299300 | 0.35427700  |
| C  | -2.13268700 | 2.16489500  | -0.55416400 |
| C  | -0.99488700 | 2.70594200  | -0.62119700 |
| C  | -0.32365100 | 3.99066200  | -0.51606800 |
| C  | 0.55995100  | 4.46500700  | -1.49602900 |
| C  | -0.65849400 | 4.82342600  | 0.56961900  |
| C  | 1.11594300  | 5.73888600  | -1.38274600 |
| H  | 0.80013500  | 3.84508500  | -2.34919500 |
| C  | -0.10301900 | 6.09430100  | 0.67442400  |
| H  | -1.34440000 | 4.45794400  | 1.32578400  |
| C  | 0.79068100  | 6.55451400  | -0.29754100 |
| H  | 1.79933200  | 6.09375000  | -2.14873200 |
| H  | -0.36115700 | 6.72280900  | 1.52146600  |
| H  | 1.22645200  | 7.54571400  | -0.21079500 |
| C  | -3.56992800 | -0.50680500 | 2.15977000  |
| C  | -5.88517900 | -1.19439300 | 0.12367200  |
| C  | -6.19789000 | -2.39274400 | 0.79216600  |
| C  | -6.81172700 | -0.73450500 | -0.83538600 |
| C  | -7.37987500 | -3.09042200 | 0.53228700  |
| H  | -5.51856500 | -2.79883800 | 1.53400600  |
| C  | -7.99553500 | -1.42437800 | -1.09914000 |
| H  | -6.60449500 | 0.17515100  | -1.39267600 |
| C  | -8.28476200 | -2.60579300 | -0.41275500 |
| H  | -7.59311300 | -4.01012900 | 1.07049500  |
| H  | -8.69050000 | -1.04048000 | -1.84114900 |
| H  | -9.20635800 | -3.14459700 | -0.61478400 |
| P  | 1.80624600  | 1.33207800  | 0.49446900  |
| P  | 0.38428600  | -1.70704400 | -0.32115400 |
| C  | -1.81735700 | -5.41070200 | -2.07416600 |
| C  | -0.51586500 | -5.13425600 | -2.49661100 |
| C  | 0.15511100  | -4.00425500 | -2.02616000 |
| C  | -0.47653900 | -3.12292600 | -1.13203300 |
| C  | -1.77308700 | -3.42817400 | -0.69422300 |

|   |             |             |             |
|---|-------------|-------------|-------------|
| C | -2.44111200 | -4.55724000 | -1.16362800 |
| H | 1.17254400  | -3.82624600 | -2.35405700 |
| H | -2.26780500 | -2.78378100 | 0.01645100  |
| C | 1.32304800  | 4.66088800  | 3.68754500  |
| C | 2.28568400  | 4.82010200  | 2.69001100  |
| C | 2.44815500  | 3.84712100  | 1.70196100  |
| C | 1.64048400  | 2.70351400  | 1.70269900  |
| C | 0.65509100  | 2.56141300  | 2.69467400  |
| C | 0.50304700  | 3.52933200  | 3.68579700  |
| H | 3.18390200  | 4.00035200  | 0.92156700  |
| H | 0.00381300  | 1.69348700  | 2.69293200  |
| C | 4.55013600  | 2.66618800  | -2.99201500 |
| C | 5.04342600  | 2.65280500  | -1.68488000 |
| C | 4.22028800  | 2.26221700  | -0.63030000 |
| C | 2.88432700  | 1.90141700  | -0.87081400 |
| C | 2.40510900  | 1.89903100  | -2.18666200 |
| C | 3.23175200  | 2.28265100  | -3.24169200 |
| H | 4.62530600  | 2.20937600  | 0.37610600  |
| H | 1.38827200  | 1.57641600  | -2.38510400 |
| C | 1.21070500  | -3.66357900 | 3.80335300  |
| C | 1.44600300  | -4.38225900 | 2.62831400  |
| C | 1.21338100  | -3.79245800 | 1.38824800  |
| C | 0.75721800  | -2.46582000 | 1.31087100  |
| C | 0.51808600  | -1.75517500 | 2.49304800  |
| C | 0.74293100  | -2.35081100 | 3.73368900  |
| H | 1.38746700  | -4.36370300 | 0.48230000  |
| H | 0.16092700  | -0.73347200 | 2.44421900  |
| H | 7.67921400  | -0.40243500 | -1.50638400 |
| C | 3.17382400  | -1.20907700 | -0.73739900 |
| C | 1.93384200  | -1.49335800 | -1.30009300 |
| C | 1.77328600  | -1.45677400 | -2.71843000 |
| H | 0.78767500  | -1.60239000 | -3.14723000 |
| C | 2.84719300  | -1.24657700 | -3.54447000 |
| H | 2.71068400  | -1.23271700 | -4.62292600 |
| C | 4.14710100  | -1.04558800 | -3.01272200 |
| C | 4.31486500  | -1.00733800 | -1.59104300 |
| H | 5.76578500  | -0.70854600 | -0.00550900 |
| C | 5.61758900  | -0.75706800 | -1.07749600 |
| C | 6.69205800  | -0.58287000 | -1.92215500 |
| H | 7.37754000  | -0.49148800 | -3.97911500 |
| C | 6.52179600  | -0.63155500 | -3.32511000 |
| H | 5.12559300  | -0.88411900 | -4.93348400 |
| C | 5.27107400  | -0.85263800 | -3.85667100 |
| H | 5.75883600  | -4.85144000 | 3.60573100  |



|    |             |             |             |
|----|-------------|-------------|-------------|
| C  | 3.80261800  | -0.67353600 | 3.49885400  |
| H  | 3.98669500  | -0.52148100 | 4.55932900  |
| C  | 3.13490100  | 0.28396700  | 2.77441200  |
| H  | 2.79802600  | 1.18297100  | 3.27492500  |
| C  | 2.87688900  | 0.10605600  | 1.38779100  |
| C  | 3.34932200  | -1.03842000 | 0.74032500  |
| C  | 4.03088200  | -2.05248800 | 1.48561000  |
| C  | 4.24191200  | -1.87404300 | 2.89070000  |
| H  | 5.02439000  | -2.75724400 | 4.70365500  |
| C  | 4.87265000  | -2.90417600 | 3.63744200  |
| C  | 5.27977800  | -4.06785900 | 3.02595000  |
| H  | 5.40194700  | -5.16726900 | 1.15985700  |
| C  | 5.07719900  | -4.24634700 | 1.63560200  |
| H  | 4.31579800  | -3.41467200 | -0.17819400 |
| C  | 4.47155200  | -3.26468700 | 0.88430000  |
| H  | -2.33623000 | -6.29030600 | -2.44416400 |
| H  | 1.20361900  | 5.41914800  | 4.45609500  |
| H  | 5.19826800  | 2.95530600  | -3.81388400 |
| H  | 1.39052300  | -4.12736600 | 4.76883500  |
| H  | -0.01308400 | -5.80256200 | -3.18993800 |
| H  | -3.45062200 | -4.76189000 | -0.81843700 |
| H  | 2.91030200  | 5.70841000  | 2.67205400  |
| H  | -0.25912400 | 3.40310900  | 4.44960300  |
| H  | 0.55732800  | -1.78544500 | 4.64225500  |
| H  | 1.81521600  | -5.40209600 | 2.67686300  |
| H  | 2.85068300  | 2.26458200  | -4.25876400 |
| H  | 6.07642600  | 2.92404700  | -1.48929300 |
| Pd | -0.41526900 | 0.60019600  | -0.34880400 |
| C  | -4.76207000 | -0.22836800 | 3.10889300  |
| H  | -5.56156400 | -0.96792000 | 3.01275900  |
| H  | -4.41218800 | -0.24994900 | 4.15052900  |
| H  | -5.19854600 | 0.76187900  | 2.93163500  |
| C  | -2.98629000 | -1.90044300 | 2.46350400  |
| H  | -2.06047500 | -2.08224200 | 1.91373900  |
| H  | -2.73462800 | -1.97579400 | 3.53085400  |
| H  | -3.67570100 | -2.71961300 | 2.23809400  |
| C  | -2.48243800 | 0.54255700  | 2.46659700  |
| H  | -1.61492200 | 0.42170900  | 1.80863300  |
| H  | -2.84610900 | 1.56806600  | 2.34282100  |
| H  | -2.13632200 | 0.42977600  | 3.50495600  |

**TS12-cf1**

|   |            |            |             |
|---|------------|------------|-------------|
| C | 2.14677000 | 1.38496300 | -1.46175500 |
| C | 2.06994200 | 0.12348200 | -1.65102900 |

|    |            |             |             |
|----|------------|-------------|-------------|
| C  | 2.78335000 | -1.08310900 | -1.98279800 |
| C  | 1.97840400 | 1.55392500  | 0.63873400  |
| C  | 3.58018500 | -1.63871900 | -0.95314200 |
| C  | 2.96376900 | 0.74749500  | 1.25964000  |
| C  | 2.33800500 | 3.36031200  | 2.22083000  |
| H  | 2.10841600 | 4.36780200  | 2.55618400  |
| C  | 3.23541200 | 2.55526400  | 2.92087600  |
| H  | 3.72790200 | 2.92468100  | 3.81585400  |
| C  | 3.55078800 | 1.28869000  | 2.42931800  |
| H  | 4.32689500 | 0.72627400  | 2.93877100  |
| C  | 1.72918000 | 2.86103600  | 1.07239200  |
| H  | 1.07089000 | 3.49970100  | 0.50440200  |
| C  | 3.55002000 | -2.72848300 | -3.57528200 |
| H  | 3.52989500 | -3.15349100 | -4.57419300 |
| C  | 4.37645600 | -3.27518200 | -2.59139000 |
| H  | 5.01524100 | -4.12206300 | -2.82560800 |
| C  | 4.38858200 | -2.73357200 | -1.30422200 |
| H  | 5.06005700 | -3.16331500 | -0.56656500 |
| C  | 2.75204100 | -1.62892300 | -3.27305100 |
| H  | 2.11231100 | -1.18202100 | -4.02735800 |
| C  | 2.97087600 | -2.23802400 | 2.10902300  |
| Si | 3.71964500 | -0.97486700 | 0.83619100  |
| C  | 5.58598200 | -0.74490300 | 1.05053000  |
| C  | 6.44082400 | -1.75320900 | 1.53125100  |
| C  | 6.18093800 | 0.45084000  | 0.60262200  |
| C  | 7.82567500 | -1.57455900 | 1.57413400  |
| H  | 6.03256400 | -2.69636400 | 1.88216000  |
| C  | 7.56306000 | 0.63529200  | 0.64008700  |
| H  | 5.55472300 | 1.25538600  | 0.22301500  |
| C  | 8.39027400 | -0.37848700 | 1.12925300  |
| H  | 8.46136400 | -2.36868100 | 1.95649700  |
| H  | 7.99496200 | 1.56878400  | 0.28910500  |
| H  | 9.46697900 | -0.23701400 | 1.16252500  |
| C  | 2.36345100 | 2.68029100  | -2.07395500 |
| C  | 1.71383100 | 2.94002100  | -3.29729600 |
| C  | 3.20320000 | 3.66023500  | -1.51885900 |
| C  | 1.89504100 | 4.15983000  | -3.94428800 |
| H  | 1.07033400 | 2.17614700  | -3.72401300 |
| C  | 3.38386200 | 4.87580000  | -2.17440100 |
| H  | 3.70991300 | 3.46235700  | -0.58134000 |
| C  | 2.72700600 | 5.13251800  | -3.38147200 |
| H  | 1.39109500 | 4.35055900  | -4.88751600 |
| H  | 4.04082700 | 5.62518300  | -1.74290900 |
| H  | 2.86767700 | 6.08468800  | -3.88476500 |

|   |             |             |             |
|---|-------------|-------------|-------------|
| P | -1.03881300 | -1.36068800 | -1.18787000 |
| P | -1.46878200 | 1.53990700  | 0.75525600  |
| C | -0.83427200 | 6.01849200  | -0.29885800 |
| C | -1.22018700 | 5.67202800  | 0.99720100  |
| C | -1.45368700 | 4.33496100  | 1.33092500  |
| C | -1.30357600 | 3.33230500  | 0.36460800  |
| C | -0.92865400 | 3.69151600  | -0.94197100 |
| C | -0.69296900 | 5.02408500  | -1.27186500 |
| H | -1.73186800 | 4.07634700  | 2.34717500  |
| H | -0.78642300 | 2.92237700  | -1.69431500 |
| C | 0.92248000  | -5.11422500 | -3.12835300 |
| C | -0.09627200 | -4.44248800 | -3.80345200 |
| C | -0.69345300 | -3.31196100 | -3.24080000 |
| C | -0.27094400 | -2.83203000 | -1.99093300 |
| C | 0.78998600  | -3.49018900 | -1.34578000 |
| C | 1.36655400  | -4.63126200 | -1.89595900 |
| H | -1.48861300 | -2.81437200 | -3.78250700 |
| H | 1.17968600  | -3.10399300 | -0.41420300 |
| C | -3.91920900 | 0.17680300  | -4.46935600 |
| C | -4.22447200 | -1.00377700 | -3.78694200 |
| C | -3.37435400 | -1.47137900 | -2.78627700 |
| C | -2.21483300 | -0.75555100 | -2.45146800 |
| C | -1.91091600 | 0.42338800  | -3.14619000 |
| C | -2.76011800 | 0.88772800  | -4.15142900 |
| H | -3.62132100 | -2.38326900 | -2.25239200 |
| H | -1.00994700 | 0.97596500  | -2.89463600 |
| C | -1.64984300 | 1.35927100  | 5.37829700  |
| C | -2.79953900 | 1.68805900  | 4.65629100  |
| C | -2.76054800 | 1.73825300  | 3.26309500  |
| C | -1.56807900 | 1.45525400  | 2.57976400  |
| C | -0.41362700 | 1.13802800  | 3.31110600  |
| C | -0.45670700 | 1.08939500  | 4.70423600  |
| H | -3.65766200 | 1.98993700  | 2.70586100  |
| H | 0.51769700  | 0.93992300  | 2.79455500  |
| H | -7.20158400 | -2.95195100 | -0.91461400 |
| C | -3.70190700 | -0.12528300 | 0.22358700  |
| C | -3.17288100 | 1.16036600  | 0.14678900  |
| C | -3.93069400 | 2.19782400  | -0.47009900 |
| H | -3.53282700 | 3.20321700  | -0.50991000 |
| C | -5.16298900 | 1.94897400  | -1.01830200 |
| H | -5.72147800 | 2.75420100  | -1.48871600 |
| C | -5.72256400 | 0.64884300  | -0.98814700 |
| C | -4.99503900 | -0.40065700 | -0.34172700 |
| H | -5.04229400 | -2.51525000 | 0.15513900  |

|    |             |             |             |
|----|-------------|-------------|-------------|
| C  | -5.57205400 | -1.70308300 | -0.32833100 |
| C  | -6.78463400 | -1.94909300 | -0.93315900 |
| H  | -8.45290800 | -1.11494100 | -2.04515400 |
| C  | -7.49605300 | -0.90672500 | -1.57530300 |
| H  | -7.51111700 | 1.17652000  | -2.08283200 |
| C  | -6.97438600 | 0.36638500  | -1.59586400 |
| H  | -4.78218400 | -2.82219300 | 5.70294800  |
| C  | -1.99228900 | -3.60732200 | 2.11404400  |
| H  | -1.61702700 | -4.52465100 | 2.56069200  |
| C  | -1.52868400 | -3.20501200 | 0.88657500  |
| H  | -0.79850200 | -3.82282900 | 0.38192200  |
| C  | -1.99502000 | -2.01069200 | 0.26760800  |
| C  | -3.00086400 | -1.26818700 | 0.89483500  |
| C  | -3.49968600 | -1.68050800 | 2.17853800  |
| C  | -2.96383400 | -2.84906000 | 2.80943600  |
| H  | -3.01729400 | -4.12718100 | 4.55361500  |
| C  | -3.43990000 | -3.23974100 | 4.08951900  |
| C  | -4.42174500 | -2.51603900 | 4.72524100  |
| H  | -5.75606300 | -0.81072000 | 4.59777200  |
| C  | -4.97333300 | -1.37337200 | 4.09697900  |
| H  | -4.96609700 | -0.09536100 | 2.39170400  |
| C  | -4.52926800 | -0.96951900 | 2.85860900  |
| H  | -0.63918500 | 7.05712800  | -0.54981100 |
| H  | 1.37737400  | -5.99878900 | -3.56471800 |
| H  | -4.58547800 | 0.54257500  | -5.24533800 |
| H  | -1.68459400 | 1.31408500  | 6.46305400  |
| H  | -1.33204900 | 6.44118400  | 1.75617800  |
| H  | -0.37245700 | 5.27915800  | -2.27735900 |
| H  | -0.43872900 | -4.80014400 | -4.77039500 |
| H  | 2.18142900  | -5.12349700 | -1.37488400 |
| H  | 0.44235100  | 0.83826100  | 5.25976400  |
| H  | -3.72969500 | 1.89725300  | 5.17655200  |
| H  | -2.52025400 | 1.80577300  | -4.68062300 |
| H  | -5.13229800 | -1.55199200 | -4.01901200 |
| Pd | 0.42879200  | 0.41223300  | -0.32958900 |
| C  | 3.25080000  | -3.70034100 | 1.69554300  |
| H  | 2.85181000  | -3.93850000 | 0.70513900  |
| H  | 4.32030100  | -3.93630100 | 1.68049700  |
| H  | 2.78120100  | -4.38436200 | 2.41583700  |
| C  | 1.44450100  | -2.03151500 | 2.19266700  |
| H  | 1.18929500  | -1.07127300 | 2.64667700  |
| H  | 0.95148600  | -2.05849000 | 1.21712200  |
| H  | 0.98176200  | -2.81680700 | 2.80534200  |
| C  | 3.54305000  | -2.01029000 | 3.52753700  |

|   |            |             |            |
|---|------------|-------------|------------|
| H | 3.28507600 | -1.01894100 | 3.91442600 |
| H | 3.11066600 | -2.74699000 | 4.21901500 |
| H | 4.63099400 | -2.11545100 | 3.57049100 |

**TS33**

|    |             |             |             |
|----|-------------|-------------|-------------|
| C  | 3.31458100  | -0.54703700 | -1.13715300 |
| C  | 4.11896400  | -1.13780900 | -2.14027200 |
| C  | 2.12572100  | 0.06119400  | -1.56759900 |
| C  | 3.75567000  | -1.13900100 | -3.48552600 |
| H  | 5.06456400  | -1.59224200 | -1.86612700 |
| C  | 1.78896900  | 0.13333000  | -2.92624100 |
| C  | 2.58782500  | -0.48959400 | -3.88678700 |
| H  | 4.39969300  | -1.61478500 | -4.21981400 |
| H  | 0.89775100  | 0.66438100  | -3.24842000 |
| H  | 2.30388200  | -0.45159800 | -4.93510500 |
| C  | 4.63568900  | 1.65167700  | 0.00865600  |
| C  | 3.63181600  | 2.49447800  | -0.53592700 |
| C  | 5.95150300  | 2.13744000  | -0.01404700 |
| C  | 3.96276600  | 3.75455400  | -1.07666800 |
| C  | 6.27763200  | 3.39374200  | -0.53079900 |
| C  | 5.27868300  | 4.20645700  | -1.06341000 |
| H  | 3.17557400  | 4.37792100  | -1.48889000 |
| H  | 7.31159200  | 3.72678600  | -0.52813400 |
| H  | 5.51883900  | 5.18135500  | -1.47740000 |
| H  | 6.75786400  | 1.51589600  | 0.35447500  |
| Pd | 0.37362800  | 0.66021100  | -0.52972500 |
| Si | 4.19868200  | -0.13023800 | 0.50118700  |
| C  | 2.20329400  | 2.25007900  | -0.51531800 |
| C  | 1.05484500  | 2.74466400  | -0.37672400 |
| C  | 0.38525900  | 4.00458800  | -0.09618000 |
| C  | 0.26145500  | 4.95571400  | -1.12374900 |
| C  | -0.05170600 | 4.32780800  | 1.19732500  |
| C  | -0.29482900 | 6.20414700  | -0.85718900 |
| H  | 0.58725900  | 4.70164400  | -2.12683300 |
| C  | -0.61023300 | 5.57842500  | 1.45548600  |
| H  | 0.05976100  | 3.60802500  | 1.99751500  |
| C  | -0.73538200 | 6.51918900  | 0.43099900  |
| H  | -0.39134400 | 6.92905700  | -1.65995800 |
| H  | -0.94122100 | 5.81769900  | 2.46202600  |
| H  | -1.17152200 | 7.49285200  | 0.63460200  |
| P  | -0.32316000 | -1.64884900 | -0.38379900 |
| P  | -1.98016500 | 1.34779300  | -0.15586400 |
| C  | -2.89473600 | 4.91028400  | -2.98527000 |
| C  | -3.34627000 | 4.96367200  | -1.66660400 |

|   |             |             |             |
|---|-------------|-------------|-------------|
| C | -3.06863600 | 3.92022400  | -0.78045600 |
| C | -2.32504600 | 2.81469000  | -1.20749900 |
| C | -1.84532900 | 2.78292700  | -2.52848000 |
| C | -2.13707800 | 3.81721200  | -3.41499900 |
| H | -3.41377300 | 3.98649000  | 0.24460700  |
| H | -1.24329900 | 1.94287400  | -2.86517100 |
| C | 2.57551500  | -5.28335100 | -0.33618700 |
| C | 1.69126800  | -5.12459900 | 0.73135200  |
| C | 0.82485500  | -4.02971300 | 0.77389500  |
| C | 0.84797500  | -3.06630500 | -0.24715200 |
| C | 1.71751400  | -3.25365100 | -1.33515300 |
| C | 2.57584900  | -4.35037400 | -1.37594500 |
| H | 0.12959000  | -3.94631800 | 1.60036600  |
| H | 1.71143400  | -2.55822300 | -2.16564900 |
| C | -2.67678100 | -3.23652500 | -4.04888300 |
| C | -2.45319100 | -4.06598600 | -2.94634900 |
| C | -1.76198700 | -3.58405800 | -1.83810700 |
| C | -1.30429000 | -2.25613700 | -1.81329300 |
| C | -1.52383900 | -1.43432700 | -2.92433200 |
| C | -2.20753100 | -1.92254900 | -4.03838300 |
| H | -1.58055300 | -4.23853300 | -0.99132000 |
| H | -1.17030300 | -0.40975100 | -2.91140500 |
| C | -3.17818500 | 2.22825700  | 4.22669700  |
| C | -4.14410700 | 2.29598100  | 3.21899400  |
| C | -3.79175600 | 2.04670000  | 1.89378900  |
| C | -2.46074200 | 1.74521300  | 1.56243900  |
| C | -1.50223600 | 1.66293500  | 2.58021200  |
| C | -1.85835700 | 1.90734800  | 3.90588700  |
| H | -4.55563600 | 2.05879400  | 1.12167100  |
| H | -0.48417000 | 1.38386400  | 2.33787500  |
| H | -5.45984900 | -5.25325800 | -0.12792800 |
| C | -3.46062500 | -1.07763200 | -0.07140900 |
| C | -3.29979200 | 0.15542200  | -0.70645800 |
| C | -4.09572800 | 0.46081900  | -1.84486100 |
| H | -4.00686900 | 1.42688900  | -2.32401800 |
| C | -4.98028200 | -0.45631700 | -2.35879400 |
| H | -5.57388600 | -0.20483200 | -3.23402600 |
| C | -5.12400400 | -1.73854200 | -1.77688000 |
| C | -4.37044900 | -2.04742400 | -0.59962600 |
| H | -3.95580100 | -3.58607500 | 0.87239900  |
| C | -4.52095900 | -3.33797500 | -0.01908900 |
| C | -5.36152500 | -4.27148000 | -0.58217700 |
| H | -6.75872300 | -4.71134200 | -2.18423500 |
| C | -6.09996300 | -3.96425800 | -1.75116700 |

|   |             |             |             |
|---|-------------|-------------|-------------|
| H | -6.54839100 | -2.47596600 | -3.22833000 |
| C | -5.98446200 | -2.72215600 | -2.33235200 |
| H | -5.24975800 | -1.21859500 | 5.88828500  |
| C | -1.27313400 | -1.68346900 | 3.59588800  |
| H | -0.70868200 | -1.76384600 | 4.52143700  |
| C | -0.62364800 | -1.75392700 | 2.39031400  |
| H | 0.45042300  | -1.87525100 | 2.38137300  |
| C | -1.33708400 | -1.65852500 | 1.15897400  |
| C | -2.70293800 | -1.38986200 | 1.17984700  |
| C | -3.40458100 | -1.33599000 | 2.43446400  |
| C | -2.67790500 | -1.50244900 | 3.65696100  |
| H | -2.79997200 | -1.57968700 | 5.81398900  |
| C | -3.36774100 | -1.45233400 | 4.89583900  |
| C | -4.72864100 | -1.24881100 | 4.93583300  |
| H | -6.52362700 | -0.90810400 | 3.76853900  |
| C | -5.45083000 | -1.07439400 | 3.73222100  |
| H | -5.37492800 | -0.96372200 | 1.60416400  |
| C | -4.80672600 | -1.10778200 | 2.51507900  |
| H | -3.11949500 | 5.72109300  | -3.67218400 |
| H | 3.24779100  | -6.13610000 | -0.36611700 |
| H | -3.21383000 | -3.61580100 | -4.91337000 |
| H | -3.45933000 | 2.40798500  | 5.26011200  |
| H | -3.91362700 | 5.82202700  | -1.31900600 |
| H | -1.76757900 | 3.77459500  | -4.43581500 |
| H | 1.66421300  | -5.85719000 | 1.53280800  |
| H | 3.24627200  | -4.46901600 | -2.22205000 |
| H | -1.10787800 | 1.82922200  | 4.68725700  |
| H | -5.17664700 | 2.52141200  | 3.46826700  |
| H | -2.37835700 | -1.27335600 | -4.89235100 |
| H | -2.82160100 | -5.08720200 | -2.94774800 |
| C | 5.66492900  | -1.31674100 | 0.68271000  |
| C | 6.90948800  | -0.98555700 | 1.24991700  |
| C | 5.43897100  | -2.67774200 | 0.38579800  |
| C | 7.89304000  | -1.95240300 | 1.47325600  |
| H | 7.12294100  | 0.03475000  | 1.55203300  |
| C | 6.41398900  | -3.64942900 | 0.61173600  |
| H | 4.48220600  | -2.99172700 | -0.02247600 |
| C | 7.65082400  | -3.28775000 | 1.14935900  |
| H | 8.84573100  | -1.66084100 | 1.90694500  |
| H | 6.20439500  | -4.68852600 | 0.37100600  |
| H | 8.41484800  | -4.04029900 | 1.32353500  |
| C | 3.36417800  | -0.19006300 | 2.24788100  |
| C | 2.06653600  | 0.61962800  | 2.37960000  |
| C | 3.09734700  | -1.65959000 | 2.63812700  |

|   |            |             |            |
|---|------------|-------------|------------|
| C | 4.38835600 | 0.40977100  | 3.24229600 |
| H | 2.21817400 | 1.68131300  | 2.16070500 |
| H | 1.28688500 | 0.25364600  | 1.70357700 |
| H | 1.67784000 | 0.53947000  | 3.40584900 |
| H | 4.02482500 | -2.23192400 | 2.72905900 |
| H | 2.58687500 | -1.70350400 | 3.61153100 |
| H | 2.47230300 | -2.17736500 | 1.90322600 |
| H | 3.96907600 | 0.38605400  | 4.25798700 |
| H | 5.32454600 | -0.15638900 | 3.26540300 |
| H | 4.62268800 | 1.45501800  | 3.00688800 |

**TS34**

|    |             |             |             |
|----|-------------|-------------|-------------|
| C  | -2.36395800 | -0.59203700 | 1.72128600  |
| C  | -1.96114100 | 0.59450900  | 1.47716700  |
| C  | -2.41342400 | 1.93128100  | 1.17359400  |
| C  | -2.02794000 | -1.63817800 | 0.01613300  |
| C  | -3.15239500 | 2.06506500  | -0.03158900 |
| C  | -3.02997400 | -1.14984200 | -0.85922500 |
| C  | -2.57736700 | -3.94624100 | -0.50295600 |
| H  | -2.39958900 | -5.00889800 | -0.36731700 |
| C  | -3.56381900 | -3.49501500 | -1.38361200 |
| H  | -4.17891800 | -4.20738000 | -1.92604500 |
| C  | -3.78061300 | -2.12673500 | -1.55158700 |
| H  | -4.58454300 | -1.81074400 | -2.21043200 |
| C  | -1.82055700 | -3.01738200 | 0.20158100  |
| H  | -1.06738300 | -3.35629600 | 0.90651000  |
| C  | -2.66986700 | 4.28005800  | 1.68092600  |
| H  | -2.48577300 | 5.12674100  | 2.33579400  |
| C  | -3.42037300 | 4.43965700  | 0.51462900  |
| H  | -3.83045500 | 5.41225600  | 0.25800400  |
| C  | -3.66989400 | 3.34169700  | -0.31336700 |
| H  | -4.30515200 | 3.48385900  | -1.18206600 |
| C  | -2.17688200 | 3.02286800  | 2.02085500  |
| H  | -1.62611500 | 2.87512200  | 2.94137500  |
| Si | -3.57116000 | 0.66282000  | -1.26857300 |
| Pd | -0.37469300 | -0.34904400 | 0.42535500  |
| P  | 1.30733100  | 1.28899700  | 1.13493800  |
| P  | 1.27003900  | -1.66590800 | -0.77829200 |
| C  | -0.62097400 | -4.76708000 | -3.69206000 |
| C  | 0.37083300  | -5.17813000 | -2.80165400 |
| C  | 0.96995100  | -4.26040000 | -1.93580400 |
| C  | 0.57928900  | -2.91240200 | -1.94710600 |
| C  | -0.44403600 | -2.51879500 | -2.82554300 |
| C  | -1.02731000 | -3.43105300 | -3.70039000 |



|   |             |             |             |
|---|-------------|-------------|-------------|
| H | 1.73204500  | -4.60820600 | -1.24925000 |
| H | -0.80798100 | -1.50050900 | -2.80797400 |
| C | 0.20168500  | 2.61466600  | 5.45106900  |
| C | 0.02818400  | 1.28901000  | 5.04288000  |
| C | 0.36387300  | 0.90848700  | 3.74362000  |
| C | 0.89687100  | 1.84469500  | 2.84115200  |
| C | 1.08158300  | 3.16876400  | 3.26333500  |
| C | 0.73025700  | 3.55074100  | 4.55998100  |
| H | 0.21095500  | -0.11894600 | 3.42661900  |
| H | 1.48407600  | 3.90772500  | 2.57905200  |
| C | 1.62345000  | 5.29780400  | -1.15589200 |
| C | 0.42152800  | 4.58670200  | -1.12306400 |
| C | 0.34968000  | 3.36887000  | -0.44847900 |
| C | 1.47897600  | 2.85154600  | 0.20122000  |
| C | 2.67565000  | 3.58159600  | 0.18646200  |
| C | 2.74788700  | 4.79537600  | -0.49722900 |
| H | -0.58721300 | 2.82859100  | -0.41517300 |
| H | 3.55108800  | 3.19773500  | 0.69874200  |
| C | 4.03752100  | -4.15668200 | 1.97212500  |
| C | 4.35641600  | -4.01983900 | 0.61851700  |
| C | 3.54102300  | -3.25948500 | -0.21697400 |
| C | 2.39470400  | -2.62924400 | 0.29447900  |
| C | 2.08110400  | -2.77222100 | 1.65321700  |
| C | 2.90061100  | -3.53262100 | 2.48876800  |
| H | 3.80378200  | -3.13964600 | -1.26356000 |
| H | 1.20347300  | -2.27346700 | 2.05713700  |
| H | 6.34471000  | 3.73777600  | -1.85265600 |
| C | 3.26811700  | 0.32263900  | -1.20758500 |
| C | 2.29562800  | -0.49629300 | -1.78821400 |
| C | 1.94029900  | -0.30142200 | -3.15290800 |
| H | 1.21642600  | -0.95554600 | -3.62017200 |
| C | 2.50640400  | 0.69904600  | -3.90215200 |
| H | 2.21144900  | 0.83304200  | -4.93983000 |
| C | 3.49458000  | 1.55074400  | -3.35177200 |
| C | 3.91042200  | 1.33776000  | -1.99825900 |
| H | 5.31819000  | 1.98995300  | -0.47944000 |
| C | 4.96359100  | 2.15116700  | -1.49034800 |
| C | 5.54097100  | 3.13306700  | -2.26318200 |
| H | 5.55984700  | 4.14402600  | -4.18486600 |
| C | 5.09922700  | 3.36189500  | -3.58852700 |
| H | 3.76200100  | 2.73400200  | -5.14217800 |
| C | 4.09886000  | 2.58154600  | -4.12003600 |
| H | 8.36661200  | -2.43252300 | 1.01739400  |
| C | 4.72838300  | -0.24812600 | 2.82354400  |

|   |             |             |             |
|---|-------------|-------------|-------------|
| H | 5.10459300  | -0.38881200 | 3.83363500  |
| C | 3.53524300  | 0.39805300  | 2.61933800  |
| H | 2.98637600  | 0.76711700  | 3.47600200  |
| C | 3.01160700  | 0.58625500  | 1.30864500  |
| C | 3.73805400  | 0.13493300  | 0.20540200  |
| C | 4.99998400  | -0.52219100 | 0.40356600  |
| C | 5.48605200  | -0.73744700 | 1.73275500  |
| H | 7.05791300  | -1.59360500 | 2.94623700  |
| C | 6.70693500  | -1.43552400 | 1.92971900  |
| C | 7.43297800  | -1.90103800 | 0.85758700  |
| H | 7.54312100  | -2.04505900 | -1.30401000 |
| C | 6.96421100  | -1.68095400 | -0.46002800 |
| H | 5.43575000  | -0.85774100 | -1.69705400 |
| C | 5.78208500  | -1.01055300 | -0.68182600 |
| H | -1.08133200 | -5.48300800 | -4.36687700 |
| H | -0.07108700 | 2.91421700  | 6.45880900  |
| H | 1.68364600  | 6.24204700  | -1.68950600 |
| H | 4.67910200  | -4.74319000 | 2.62331300  |
| H | 0.68600800  | -6.21749500 | -2.77761700 |
| H | -1.81278400 | -3.10132900 | -4.37396700 |
| H | -0.37210900 | 0.55368900  | 5.73553200  |
| H | 0.87021300  | 4.58167100  | 4.87223800  |
| H | 2.65445100  | -3.63088000 | 3.54218900  |
| H | 5.25083500  | -4.48635900 | 0.21789500  |
| H | 3.68593700  | 5.34164800  | -0.52228100 |
| H | -0.46267400 | 4.97528400  | -1.62014700 |
| C | -3.10269900 | -1.39466200 | 2.67525900  |
| C | -2.86889300 | -1.16707100 | 4.04545100  |
| C | -4.10000100 | -2.30708000 | 2.28457200  |
| C | -3.61157600 | -1.84966300 | 5.00577300  |
| H | -2.11431500 | -0.44429300 | 4.33635600  |
| C | -4.84383400 | -2.97630500 | 3.25235300  |
| H | -4.30344000 | -2.46784300 | 1.23305200  |
| C | -4.59755600 | -2.75799300 | 4.61165500  |
| H | -3.42446300 | -1.67011500 | 6.06057500  |
| H | -5.62140900 | -3.66943200 | 2.94503500  |
| H | -5.17662600 | -3.29018300 | 5.36080600  |
| C | -5.45811800 | 0.58566700  | -1.23746600 |
| C | -6.30319700 | 0.65158800  | -2.35784300 |
| C | -6.05897400 | 0.40229900  | 0.02488300  |
| C | -7.69073800 | 0.54111100  | -2.22666700 |
| H | -5.88846300 | 0.79134200  | -3.35096000 |
| C | -7.44126100 | 0.28681100  | 0.16176100  |
| H | -5.43763300 | 0.34897400  | 0.91735300  |

|   |             |             |             |
|---|-------------|-------------|-------------|
| C | -8.26219600 | 0.35724200  | -0.96745500 |
| H | -8.32269100 | 0.59903000  | -3.10886000 |
| H | -7.87880400 | 0.14550700  | 1.14647900  |
| H | -9.34041500 | 0.27088200  | -0.86480700 |
| C | -2.82065700 | 1.09348600  | -3.00557100 |
| C | -1.29024600 | 1.24572800  | -2.86499000 |
| C | -3.11684300 | -0.03228700 | -4.02385200 |
| C | -3.37026400 | 2.41973700  | -3.57918900 |
| H | -1.02290900 | 2.17909600  | -2.36598800 |
| H | -0.82398700 | 0.43630800  | -2.29222700 |
| H | -0.81110000 | 1.26106400  | -3.85352900 |
| H | -4.18876800 | -0.17276300 | -4.19724700 |
| H | -2.66106000 | 0.21890400  | -4.99157400 |
| H | -2.71064800 | -0.99593400 | -3.70769000 |
| H | -2.95944700 | 2.58230600  | -4.58542700 |
| H | -4.46153500 | 2.42848500  | -3.66598800 |
| H | -3.07296900 | 3.27895900  | -2.97053600 |
